# Supplementary material for: A Multi-Omics Approach for Rapid Identification of Large Genomic Lesions at the Wheat Dense Spike (wds) Locus
Source: Front Plant Sci. 2022 Apr 13;13:850302. doi: 10.3389/fpls.2022.850302 (PMC9043957; doi:10.3389/fpls.2022.850302)
Supplement: Supplementary file 18 [file Table_14.xlsx]

## Sheet: Sheet1
Supplementary Table 14 GO enrichment result of DEGs at the W8.5 stage
ID	Description	GeneRatio	BgRatio	pvalue	p.adjust	qvalue	geneID	Count	Term_type
GO:0045471	response to ethanol	36/3745	89/107890	4.16328e-29	1.09411e-25	1.0268e-25	TraesCS3B02G131200/TraesCS4D02G145600/TraesCS4B02G211700/TraesCS4D02G145500/TraesCS6B02G374100/TraesCS3D02G114800/TraesCS3D02G114900/TraesCS3D02G114700/TraesCS3D02G115300/TraesCS4D02G212300/TraesCS3A02G112900/TraesCS4D02G213300/TraesCS7B02G347100/TraesCS3B02G130500/TraesCS3D02G115000/TraesCS3A02G113000/TraesCS3B02G131000/TraesCS4B02G212300/TraesCS6D02G322300/TraesCS3B02G130300/TraesCS4A02G092100/…	36	BP
GO:0046688	response to copper ion	45/3745	199/107890	9.04295e-24	1.18824e-20	1.11514e-20	TraesCS6D02G338400/TraesCS5A02G151400/TraesCS3D02G164500/TraesCS5B02G149900/TraesCS3B02G131200/TraesCS4D02G145600/TraesCS4B02G211700/TraesCS4D02G145500/TraesCS6B02G374100/TraesCS3D02G114800/TraesCS3D02G114900/TraesCS3D02G114700/TraesCS5D02G156500/TraesCS3D02G115300/TraesCS4D02G212300/TraesCS6B02G450100/TraesCS3A02G112900/TraesCS4D02G213300/TraesCS7B02G347100/TraesCS3B02G130500/TraesCS3D02G115000/…	45	BP
GO:0046685	response to arsenic-containing substance	42/3745	296/107890	1.46522e-14	1.28354e-11	1.20457e-11	TraesCS7A02G215700/TraesCS6D02G257400/TraesCS6B02G408100/TraesCS3B02G131200/TraesCS4D02G145600/TraesCS4B02G211700/TraesCS4D02G145500/TraesCS2D02G033200/TraesCS6B02G374100/TraesCS6B02G336000/TraesCS3D02G114800/TraesCS3D02G114900/TraesCS3D02G114700/TraesCS3D02G115300/TraesCS4D02G212300/TraesCS3A02G112900/TraesCS4D02G213300/TraesCS7B02G347100/TraesCS3B02G130500/TraesCS3D02G115000/TraesCS3A02G113000/…	42	BP
GO:0009834	plant-type secondary cell wall biogenesis	40/3745	313/107890	1.89284e-12	1.2436e-09	1.16709e-09	TraesCS6D02G251700/TraesCS6D02G303000/TraesCS6D02G274900/TraesCS1B02G277500/TraesCS3B02G082700/TraesCS3A02G440800/TraesCS3D02G105500/TraesCS1D02G146600/TraesCS5D02G230300/TraesCS3D02G433400/TraesCS3A02G289900/TraesCS1B02G167200/TraesCS5A02G222500/TraesCS3B02G120700/TraesCS3A02G103100/TraesCS5D02G269300/TraesCS3D02G289600/TraesCS3A02G246600/TraesCS3D02G244900/TraesCS2A02G175000/TraesCS1A02G149300/…	40	BP
GO:0051259	protein complex oligomerization	45/3745	398/107890	6.0295e-12	3.1691e-09	2.97413e-09	TraesCS6D02G183200/TraesCS6D02G183600/TraesCS7A02G213900/TraesCS7B02G283000/TraesCS6B02G187600/TraesCS6B02G233800/TraesCS3B02G131200/TraesCS4D02G145600/TraesCS4B02G211700/TraesCS4D02G145500/TraesCS6B02G374100/TraesCS3D02G114800/TraesCS3D02G114900/TraesCS3D02G114700/TraesCS3D02G115300/TraesCS2B02G129600/TraesCS4D02G212300/TraesCS3A02G112900/TraesCS4D02G213300/TraesCS7B02G347100/TraesCS3B02G130500/…	45	BP
GO:0046271	phenylpropanoid catabolic process	27/3745	168/107890	3.77038e-11	1.41551e-08	1.32842e-08	TraesCS6B02G258400/TraesCS6A02G222900/TraesCS6A02G222800/TraesCS5A02G151400/TraesCS6B02G258500/TraesCS5B02G149900/TraesCS2A02G380800/TraesCS2D02G377200/TraesCS2B02G398000/TraesCS3D02G354400/TraesCS3B02G392700/TraesCS5D02G156500/TraesCS3A02G360600/TraesCS6B02G450100/TraesCS4D02G133800/TraesCS3D02G354200/TraesCS2B02G398400/TraesCS4A02G096400/TraesCS3A02G360400/TraesCS1B02G293100/TraesCS2B02G398200/…	27	BP
GO:0046274	lignin catabolic process	27/3745	168/107890	3.77038e-11	1.41551e-08	1.32842e-08	TraesCS6B02G258400/TraesCS6A02G222900/TraesCS6A02G222800/TraesCS5A02G151400/TraesCS6B02G258500/TraesCS5B02G149900/TraesCS2A02G380800/TraesCS2D02G377200/TraesCS2B02G398000/TraesCS3D02G354400/TraesCS3B02G392700/TraesCS5D02G156500/TraesCS3A02G360600/TraesCS6B02G450100/TraesCS4D02G133800/TraesCS3D02G354200/TraesCS2B02G398400/TraesCS4A02G096400/TraesCS3A02G360400/TraesCS1B02G293100/TraesCS2B02G398200/…	27	BP
GO:0009727	detection of ethylene stimulus	13/3745	49/107890	8.46673e-09	2.78132e-06	2.6102e-06	TraesCS6D02G305100/TraesCS6D02G305400/TraesCS6D02G305200/TraesCS1A02G089600/TraesCS1D02G098000/TraesCS1B02G117500/TraesCS1D02G098100/TraesCS1B02G117400/TraesCS6B02G356200/TraesCS6B02G355700/TraesCS1A02G089500/TraesCS6B02G355900/TraesCS6B02G355800	13	BP
GO:0009720	detection of hormone stimulus	16/3745	81/107890	1.69899e-08	4.46496e-06	4.19025e-06	TraesCS6D02G305100/TraesCS6D02G305400/TraesCS6D02G305200/TraesCS1A02G089600/TraesCS1D02G098000/TraesCS1B02G117500/TraesCS1D02G098100/TraesCS1B02G117400/TraesCS6B02G356200/TraesCS6B02G355700/TraesCS1A02G089500/TraesCS6B02G355900/TraesCS4D02G341000/TraesCS4B02G346100/TraesCS5A02G515000/TraesCS6B02G355800	16	BP
GO:0009726	detection of endogenous stimulus	16/3745	81/107890	1.69899e-08	4.46496e-06	4.19025e-06	TraesCS6D02G305100/TraesCS6D02G305400/TraesCS6D02G305200/TraesCS1A02G089600/TraesCS1D02G098000/TraesCS1B02G117500/TraesCS1D02G098100/TraesCS1B02G117400/TraesCS6B02G356200/TraesCS6B02G355700/TraesCS1A02G089500/TraesCS6B02G355900/TraesCS4D02G341000/TraesCS4B02G346100/TraesCS5A02G515000/TraesCS6B02G355800	16	BP
GO:0051260	protein homooligomerization	25/3745	246/107890	1.9726e-06	0.000471273	0.000442278	TraesCS7B02G283000/TraesCS6B02G187600/TraesCS4B02G211700/TraesCS6B02G374100/TraesCS3D02G115300/TraesCS4D02G212300/TraesCS4D02G213300/TraesCS3B02G130500/TraesCS3D02G115000/TraesCS4B02G212300/TraesCS4A02G092100/TraesCS3A02G113100/TraesCS2B02G429300/TraesCS4A02G092900/TraesCS3B02G131300/TraesCS3D02G045500/TraesCS3A02G035400/TraesCS3D02G115200/TraesCS3B02G130400/TraesCS3D02G115100/TraesCS3B02G049900/…	25	BP
GO:0009593	detection of chemical stimulus	19/3745	170/107890	8.25543e-06	0.00163456	0.001534	TraesCS6D02G305100/TraesCS6D02G305400/TraesCS6D02G305200/TraesCS1A02G089600/TraesCS1D02G098000/TraesCS1B02G117500/TraesCS1D02G098100/TraesCS1B02G117400/TraesCS6B02G356200/TraesCS6B02G355700/TraesCS1A02G089500/TraesCS5B02G153300/TraesCS6B02G355900/TraesCS4D02G341000/TraesCS4B02G346100/TraesCS5A02G515000/TraesCS6B02G355800/TraesCS5D02G392200/TraesCS5A02G382800	19	BP
GO:0009800	cinnamic acid biosynthetic process	11/3745	62/107890	8.61546e-06	0.00163456	0.001534	TraesCS6B02G258400/TraesCS6A02G222900/TraesCS6A02G222800/TraesCS6B02G258500/TraesCS2D02G204400/TraesCS2A02G380800/TraesCS2D02G377200/TraesCS2B02G398000/TraesCS2B02G398400/TraesCS2B02G398200/TraesCS2B02G224300	11	BP
GO:0046244	salicylic acid catabolic process	10/3745	51/107890	8.7077e-06	0.00163456	0.001534	TraesCS6B02G258400/TraesCS6A02G222900/TraesCS6A02G222800/TraesCS6B02G258500/TraesCS2A02G380800/TraesCS2D02G377200/TraesCS2B02G398000/TraesCS2B02G398400/TraesCS2B02G398200/TraesCS2B02G224300	10	BP
GO:0010091	trichome branching	17/3745	142/107890	9.74418e-06	0.00170718	0.00160215	TraesCS6D02G304300/TraesCS6D02G314600/TraesCS3A02G209500/TraesCS6B02G367000/TraesCS7A02G450400/TraesCS6B02G354900/TraesCS6B02G431400/TraesCS7B02G350200/TraesCS7D02G439800/TraesCS5D02G396300/TraesCS3B02G013300/TraesCS5A02G386500/TraesCS6B02G365700/TraesCS3A02G010000/TraesCS3D02G316100/TraesCS3B02G351500/TraesCS3A02G315400	17	BP
GO:0042447	hormone catabolic process	15/3745	120/107890	1.89966e-05	0.00290429	0.00272561	TraesCS6B02G258400/TraesCS6A02G222900/TraesCS6A02G222800/TraesCS6B02G258500/TraesCS4D02G121000/TraesCS2A02G380800/TraesCS2D02G377200/TraesCS2B02G398000/TraesCS1D02G302500/TraesCS1A02G303100/TraesCS2B02G398400/TraesCS1A02G126400/TraesCS2B02G398200/TraesCS2B02G224300/TraesCS1D02G127000	15	BP
GO:1904667	negative regulation of ubiquitin protein ligase activity	5/3745	11/107890	1.94829e-05	0.00290429	0.00272561	TraesCS6D02G190300/TraesCS6D02G391200/TraesCS6B02G452500/TraesCS6B02G452700/TraesCS6B02G225400	5	BP
GO:0009804	coumarin metabolic process	27/3745	317/107890	2.09975e-05	0.00290429	0.00272561	TraesCS7A02G231200/TraesCS7A02G240400/TraesCS6D02G174100/TraesCS6D02G364600/TraesCS7A02G211400/TraesCS3B02G034800/TraesCS6B02G258400/TraesCS6A02G222900/TraesCS6A02G222800/TraesCS7D02G239200/TraesCS6B02G258500/TraesCS7B02G135900/TraesCS2D02G204400/TraesCS4B02G151300/TraesCS2A02G380800/TraesCS2D02G377200/TraesCS2B02G398000/TraesCS5B02G155400/TraesCS3B02G612000/TraesCS2B02G102900/TraesCS5B02G155600/…	27	BP
GO:0009805	coumarin biosynthetic process	27/3745	317/107890	2.09975e-05	0.00290429	0.00272561	TraesCS7A02G231200/TraesCS7A02G240400/TraesCS6D02G174100/TraesCS6D02G364600/TraesCS7A02G211400/TraesCS3B02G034800/TraesCS6B02G258400/TraesCS6A02G222900/TraesCS6A02G222800/TraesCS7D02G239200/TraesCS6B02G258500/TraesCS7B02G135900/TraesCS2D02G204400/TraesCS4B02G151300/TraesCS2A02G380800/TraesCS2D02G377200/TraesCS2B02G398000/TraesCS5B02G155400/TraesCS3B02G612000/TraesCS2B02G102900/TraesCS5B02G155600/…	27	BP
GO:0016485	protein processing	23/3745	249/107890	2.35103e-05	0.00308926	0.0028992	TraesCS7A02G266100/TraesCS6D02G226800/TraesCS6D02G239500/TraesCS6D02G232000/TraesCS7A02G225000/TraesCS6D02G355100/TraesCS6D02G313700/TraesCS6D02G314000/TraesCS6D02G311800/TraesCS4B02G257300/TraesCS6D02G312200/TraesCS1B02G249800/TraesCS6B02G335200/TraesCS6B02G343300/TraesCS6B02G388200/TraesCS3D02G273600/TraesCS3A02G274400/TraesCS3B02G308100/TraesCS1D02G342100/TraesCS6B02G408200/TraesCS6B02G363400/…	23	BP
GO:0006559	L-phenylalanine catabolic process	12/3745	85/107890	3.76746e-05	0.00441928	0.00414739	TraesCS6B02G258400/TraesCS6A02G222900/TraesCS6A02G222800/TraesCS6B02G258500/TraesCS2D02G204400/TraesCS2A02G380800/TraesCS2D02G377200/TraesCS2B02G398000/TraesCS2B02G398400/TraesCS6B02G369300/TraesCS2B02G398200/TraesCS2B02G224300	12	BP
GO:1902222	erythrose 4-phosphate/phosphoenolpyruvate family amino acid catabolic process	12/3745	85/107890	3.76746e-05	0.00441928	0.00414739	TraesCS6B02G258400/TraesCS6A02G222900/TraesCS6A02G222800/TraesCS6B02G258500/TraesCS2D02G204400/TraesCS2A02G380800/TraesCS2D02G377200/TraesCS2B02G398000/TraesCS2B02G398400/TraesCS6B02G369300/TraesCS2B02G398200/TraesCS2B02G224300	12	BP
GO:0019336	phenol-containing compound catabolic process	10/3745	60/107890	3.86771e-05	0.00441928	0.00414739	TraesCS6B02G258400/TraesCS6A02G222900/TraesCS6A02G222800/TraesCS6B02G258500/TraesCS2A02G380800/TraesCS2D02G377200/TraesCS2B02G398000/TraesCS2B02G398400/TraesCS2B02G398200/TraesCS2B02G224300	10	BP
GO:0010077	maintenance of inflorescence meristem identity	11/3745	73/107890	4.2522e-05	0.00465616	0.0043697	TraesCS6D02G293200/TraesCS1A02G199900/TraesCS3A02G432900/TraesCS3D02G427900/TraesCS2B02G300500/TraesCS7D02G261900/TraesCS2D02G442200/TraesCS3D02G428000/TraesCS7B02G158900/TraesCS7D02G176700/TraesCS6B02G343900	11	BP
GO:0030244	cellulose biosynthetic process	33/3745	451/107890	6.00283e-05	0.00614541	0.00576732	TraesCS6D02G181000/TraesCS6D02G304800/TraesCS7A02G241800/TraesCS6D02G235500/TraesCS6D02G231000/TraesCS6D02G303000/TraesCS1B02G252100/TraesCS7A02G298600/TraesCS7D02G294300/TraesCS7B02G188400/TraesCS1D02G146600/TraesCS5B02G152100/TraesCS6B02G229600/TraesCS5D02G230300/TraesCS3A02G289900/TraesCS1B02G167200/TraesCS5A02G222500/TraesCS4A02G110000/TraesCS3D02G164400/TraesCS3D02G289600/TraesCS7A02G415500/…	33	BP
GO:0034059	response to anoxia	7/3745	30/107890	6.07994e-05	0.00614541	0.00576732	TraesCS2D02G034400/TraesCS3B02G119800/TraesCS5D02G320800/TraesCS5B02G315500/TraesCS2D02G110000/TraesCS2A02G109800/TraesCS5A02G314600	7	BP
GO:0009803	cinnamic acid metabolic process	11/3745	78/107890	7.93233e-05	0.0077208	0.00724579	TraesCS6B02G258400/TraesCS6A02G222900/TraesCS6A02G222800/TraesCS6B02G258500/TraesCS2D02G204400/TraesCS2A02G380800/TraesCS2D02G377200/TraesCS2B02G398000/TraesCS2B02G398400/TraesCS2B02G398200/TraesCS2B02G224300	11	BP
GO:0010089	xylem development	26/3745	330/107890	0.000107312	0.010072	0.00945232	TraesCS6D02G250800/TraesCS7A02G263800/TraesCS6D02G245400/TraesCS2A02G306800/TraesCS5B02G152100/TraesCS5D02G230300/TraesCS4A02G110000/TraesCS6B02G345300/TraesCS1D02G228100/TraesCS5D02G031600/TraesCS5D02G107900/TraesCS6B02G237800/TraesCS3D02G235200/TraesCS5A02G386500/TraesCS4D02G341000/TraesCS4D02G195000/TraesCS5A02G025200/TraesCS4B02G194100/TraesCS4B02G346100/TraesCS5A02G515000/TraesCS1A02G226700/…	26	BP
GO:0015692	lead ion transport	5/3745	15/107890	0.000112713	0.0102142	0.00958576	TraesCS3A02G218000/TraesCS3B02G248500/TraesCS3D02G234300/TraesCS7B02G292700/TraesCS7D02G386600	5	BP
GO:0046864	isoprenoid transport	6/3745	25/107890	0.000174583	0.0143376	0.0134555	TraesCS3A02G218000/TraesCS3B02G248500/TraesCS3D02G234300/TraesCS7B02G292700/TraesCS7B02G262200/TraesCS7D02G386600	6	BP
GO:0046865	terpenoid transport	6/3745	25/107890	0.000174583	0.0143376	0.0134555	TraesCS3A02G218000/TraesCS3B02G248500/TraesCS3D02G234300/TraesCS7B02G292700/TraesCS7B02G262200/TraesCS7D02G386600	6	BP
GO:0080168	abscisic acid transport	6/3745	25/107890	0.000174583	0.0143376	0.0134555	TraesCS3A02G218000/TraesCS3B02G248500/TraesCS3D02G234300/TraesCS7B02G292700/TraesCS7B02G262200/TraesCS7D02G386600	6	BP
GO:0010215	cellulose microfibril organization	8/3745	47/107890	0.000196207	0.0156252	0.0146639	TraesCS5B02G159100/TraesCS2A02G175000/TraesCS5D02G107900/TraesCS5B02G101400/TraesCS6B02G418400/TraesCS5A02G095200/TraesCS2D02G182400/TraesCS2B02G201400	8	BP
GO:0060151	peroxisome localization	9/3745	61/107890	0.000245812	0.0189998	0.0178309	TraesCS6D02G263000/TraesCS6D02G350800/TraesCS3A02G209500/TraesCS6B02G367000/TraesCS6B02G431400/TraesCS6B02G403400/TraesCS5D02G396300/TraesCS5A02G386500/TraesCS5A02G382800	9	BP
GO:0051645	Golgi localization	9/3745	62/107890	0.000278759	0.0209308	0.0196431	TraesCS6D02G263000/TraesCS6D02G350800/TraesCS3A02G209500/TraesCS6B02G367000/TraesCS6B02G431400/TraesCS6B02G403400/TraesCS5D02G396300/TraesCS5A02G386500/TraesCS5A02G382800	9	BP
GO:0006465	signal peptide processing	9/3745	64/107890	0.000355656	0.0256938	0.024113	TraesCS7A02G225000/TraesCS6D02G355100/TraesCS6D02G313700/TraesCS6D02G314000/TraesCS6D02G311800/TraesCS6D02G312200/TraesCS1B02G249800/TraesCS6B02G408200/TraesCS6B02G363400	9	BP
GO:1904029	regulation of cyclin-dependent protein kinase activity	18/3745	207/107890	0.000361747	0.0256938	0.024113	TraesCS7A02G227400/TraesCS6D02G301100/TraesCS6D02G223800/TraesCS6D02G332100/TraesCS2B02G235200/TraesCS5B02G140300/TraesCS4B02G116000/TraesCS6B02G362300/TraesCS6B02G352100/TraesCS4B02G115800/TraesCS6B02G345300/TraesCS6B02G382700/TraesCS3D02G164600/TraesCS7A02G191700/TraesCS6B02G113800/TraesCS1B02G375400/TraesCS5D02G247100/TraesCS6A02G083300	18	BP
GO:0000079	regulation of cyclin-dependent protein serine/threonine kinase activity	17/3745	190/107890	0.000374072	0.02587	0.0242784	TraesCS7A02G227400/TraesCS6D02G301100/TraesCS6D02G223800/TraesCS6D02G332100/TraesCS2B02G235200/TraesCS5B02G140300/TraesCS4B02G116000/TraesCS6B02G362300/TraesCS6B02G352100/TraesCS4B02G115800/TraesCS6B02G345300/TraesCS6B02G382700/TraesCS3D02G164600/TraesCS7A02G191700/TraesCS6B02G113800/TraesCS5D02G247100/TraesCS6A02G083300	17	BP
GO:1903321	negative regulation of protein modification by small protein conjugation or removal	6/3745	31/107890	0.000607283	0.0409215	0.0384039	TraesCS6D02G190300/TraesCS6D02G391200/TraesCS6A02G309600/TraesCS6B02G452500/TraesCS6B02G452700/TraesCS6B02G225400	6	BP
GO:0006558	L-phenylalanine metabolic process	12/3745	116/107890	0.000734935	0.0471076	0.0442093	TraesCS6B02G258400/TraesCS6A02G222900/TraesCS6A02G222800/TraesCS6B02G258500/TraesCS2D02G204400/TraesCS2A02G380800/TraesCS2D02G377200/TraesCS2B02G398000/TraesCS2B02G398400/TraesCS6B02G369300/TraesCS2B02G398200/TraesCS2B02G224300	12	BP
GO:1902221	erythrose 4-phosphate/phosphoenolpyruvate family amino acid metabolic process	12/3745	116/107890	0.000734935	0.0471076	0.0442093	TraesCS6B02G258400/TraesCS6A02G222900/TraesCS6A02G222800/TraesCS6B02G258500/TraesCS2D02G204400/TraesCS2A02G380800/TraesCS2D02G377200/TraesCS2B02G398000/TraesCS2B02G398400/TraesCS6B02G369300/TraesCS2B02G398200/TraesCS2B02G224300	12	BP
GO:0009819	drought recovery	10/3745	86/107890	0.000803744	0.0486262	0.0456345	TraesCS6B02G258400/TraesCS6A02G222900/TraesCS6A02G222800/TraesCS6B02G258500/TraesCS2A02G380800/TraesCS2D02G377200/TraesCS2B02G398000/TraesCS2B02G398400/TraesCS2B02G398200/TraesCS2B02G224300	10	BP
GO:0009270	response to humidity	4/3745	13/107890	0.000805548	0.0486262	0.0456345	TraesCS6D02G057900/TraesCS1B02G247700/TraesCS6B02G235200/TraesCS6A02G189800	4	BP
GO:0017148	negative regulation of translation	22/3745	298/107890	0.000832458	0.0486262	0.0456345	TraesCS6D02G373400/TraesCS7A02G067600/TraesCS6D02G293200/TraesCS4D02G023100/TraesCS7D02G061700/TraesCSU02G125400/TraesCS6A02G406200/TraesCS3A02G519500/TraesCS5A02G552500/TraesCS4B02G388100/TraesCS1B02G261000/TraesCS3A02G519400/TraesCS3B02G577000/TraesCS7A02G067700/TraesCS7D02G176700/TraesCS6B02G421000/TraesCS6B02G428600/TraesCS6B02G343900/TraesCS7B02G114200/TraesCS6B02G450900/TraesCS3A02G232500/T…	22	BP
GO:0009835	fruit ripening	16/3745	186/107890	0.00083876	0.0486262	0.0456345	TraesCS6D02G305100/TraesCS6D02G305400/TraesCS6A02G014100/TraesCS6D02G305200/TraesCS1A02G089600/TraesCS1D02G098000/TraesCS1B02G117500/TraesCS1D02G098100/TraesCS1B02G117400/TraesCS6B02G356200/TraesCS6B02G355700/TraesCS1A02G089500/TraesCS6B02G355900/TraesCS6A02G243300/TraesCS6B02G355800/TraesCS2A02G396400	16	BP
GO:0071668	plant-type cell wall assembly	8/3745	58/107890	0.000853557	0.0486262	0.0456345	TraesCS5B02G159100/TraesCS2A02G175000/TraesCS5D02G107900/TraesCS5B02G101400/TraesCS6B02G418400/TraesCS5A02G095200/TraesCS2D02G182400/TraesCS2B02G201400	8	BP
GO:0034249	negative regulation of cellular amide metabolic process	22/3745	299/107890	0.000869646	0.0486262	0.0456345	TraesCS6D02G373400/TraesCS7A02G067600/TraesCS6D02G293200/TraesCS4D02G023100/TraesCS7D02G061700/TraesCSU02G125400/TraesCS6A02G406200/TraesCS3A02G519500/TraesCS5A02G552500/TraesCS4B02G388100/TraesCS1B02G261000/TraesCS3A02G519400/TraesCS3B02G577000/TraesCS7A02G067700/TraesCS7D02G176700/TraesCS6B02G421000/TraesCS6B02G428600/TraesCS6B02G343900/TraesCS7B02G114200/TraesCS6B02G450900/TraesCS3A02G232500/T…	22	BP
GO:0051444	negative regulation of ubiquitin-protein transferase activity	5/3745	23/107890	0.00100176	0.0548466	0.0514722	TraesCS6D02G190300/TraesCS6D02G391200/TraesCS6B02G452500/TraesCS6B02G452700/TraesCS6B02G225400	5	BP
GO:0006874	cellular calcium ion homeostasis	10/3745	89/107890	0.00105114	0.0563753	0.0529069	TraesCS6D02G204000/TraesCS6D02G187200/TraesCS6D02G211700/TraesCS6B02G344100/TraesCS4A02G405400/TraesCS2D02G356300/TraesCS6B02G250200/TraesCS6B02G224100/TraesCS6B02G382300/TraesCS6B02G382500	10	BP
GO:0002181	cytoplasmic translation	22/3745	304/107890	0.00107787	0.0566527	0.0531672	TraesCS6D02G262100/TraesCS7A02G244800/TraesCS7A02G266000/TraesCS6D02G331000/TraesCS4B02G218000/TraesCS2D02G580700/TraesCS4D02G218400/TraesCS6D02G371300/TraesCS7D02G069200/TraesCS2A02G253600/TraesCS1B02G240000/TraesCS4B02G218100/TraesCS6B02G421000/TraesCS6B02G376800/TraesCS6B02G225600/TraesCS6B02G415800/TraesCS6B02G381600/TraesCS3D02G161300/TraesCS3A02G205600/TraesCS6B02G425800/TraesCS7A02G414100/…	22	BP
GO:0051646	mitochondrion localization	10/3745	91/107890	0.00124826	0.064322	0.0603646	TraesCS6D02G263000/TraesCS6D02G350800/TraesCS3A02G209500/TraesCS6B02G367000/TraesCS6B02G387400/TraesCS6B02G431400/TraesCS6B02G403400/TraesCS5D02G396300/TraesCS5A02G386500/TraesCS5A02G382800	10	BP
GO:0031400	negative regulation of protein modification process	28/3745	430/107890	0.00127301	0.0643362	0.060378	TraesCS6D02G336200/TraesCS6D02G263500/TraesCS6D02G301100/TraesCS6D02G190300/TraesCS6D02G196000/TraesCS6A02G037000/TraesCS6D02G391200/TraesCSU02G125400/TraesCS7B02G278100/TraesCS4A02G372200/TraesCS7D02G069700/TraesCS5A02G552500/TraesCS1B02G243500/TraesCS7A02G074600/TraesCS4B02G388100/TraesCS7B02G027500/TraesCS3B02G573800/TraesCS3D02G513300/TraesCS6B02G235500/TraesCS6A02G309600/TraesCS6B02G352100/T…	28	BP
GO:0000413	protein peptidyl-prolyl isomerization	17/3745	214/107890	0.00141598	0.0695073	0.065231	TraesCS7A02G279300/TraesCS7A02G222800/TraesCS6D02G293100/TraesCS6D02G352100/TraesCS6D02G257200/TraesCS7A02G266500/TraesCS6B02G344100/TraesCS6B02G404500/TraesCS6B02G233500/TraesCS2A02G277100/TraesCS2D02G276000/TraesCS6B02G343800/TraesCS3A02G209000/TraesCS7B02G175400/TraesCS7A02G419600/TraesCS6B02G331700/TraesCS2B02G294500	17	BP
GO:0000723	telomere maintenance	26/3745	392/107890	0.00143547	0.0695073	0.065231	TraesCS7A02G258600/TraesCS6D02G327900/TraesCS6D02G378100/TraesCS6D02G315400/TraesCS6D02G302200/TraesCS6D02G196000/TraesCS6B02G311300/TraesCS3A02G145600/TraesCS1B02G328200/TraesCS6D02G092000/TraesCS1A02G126600/TraesCS7B02G121400/TraesCS3A02G486100/TraesCS7B02G254500/TraesCS3A02G211500/TraesCS6B02G333700/TraesCS6B02G366400/TraesCS6B02G356900/TraesCS6B02G399000/TraesCS6B02G351900/TraesCS6B02G353100/…	26	BP
GO:0071277	cellular response to calcium ion	4/3745	15/107890	0.00145468	0.0695073	0.065231	TraesCS6D02G271900/TraesCS2D02G033200/TraesCS2B02G047400/TraesCS2A02G033700	4	BP
GO:0032784	regulation of DNA-templated transcription, elongation	9/3745	78/107890	0.00152729	0.0716735	0.0672639	TraesCS6D02G304800/TraesCS6D02G311700/TraesCS6D02G215900/TraesCS4D02G145700/TraesCS4B02G116000/TraesCS6B02G350800/TraesCS4B02G115800/TraesCS6B02G355400/TraesCS6B02G363200	9	BP
GO:0032200	telomere organization	26/3745	395/107890	0.00159623	0.0735946	0.0690668	TraesCS7A02G258600/TraesCS6D02G327900/TraesCS6D02G378100/TraesCS6D02G315400/TraesCS6D02G302200/TraesCS6D02G196000/TraesCS6B02G311300/TraesCS3A02G145600/TraesCS1B02G328200/TraesCS6D02G092000/TraesCS1A02G126600/TraesCS7B02G121400/TraesCS3A02G486100/TraesCS7B02G254500/TraesCS3A02G211500/TraesCS6B02G333700/TraesCS6B02G366400/TraesCS6B02G356900/TraesCS6B02G399000/TraesCS6B02G351900/TraesCS6B02G353100/…	26	BP
GO:1904666	regulation of ubiquitin protein ligase activity	7/3745	51/107890	0.00183245	0.0824582	0.077385	TraesCS6D02G190300/TraesCS6D02G391200/TraesCS6D02G354500/TraesCS6B02G402400/TraesCS6B02G452500/TraesCS6B02G452700/TraesCS6B02G225400	7	BP
GO:0031670	cellular response to nutrient	6/3745	38/107890	0.00185123	0.0824582	0.077385	TraesCS6D02G294500/TraesCS6D02G187200/TraesCS6D02G211700/TraesCS6D02G192000/TraesCS6B02G345700/TraesCS6B02G224100	6	BP
GO:0010099	regulation of photomorphogenesis	11/3745	114/107890	0.00211137	0.0907893	0.0852036	TraesCS6D02G202000/TraesCS6D02G305800/TraesCS6D02G391200/TraesCS6A02G216400/TraesCS1B02G244300/TraesCS6B02G356400/TraesCS6B02G452500/TraesCS6B02G452700/TraesCS3A02G210100/TraesCS5D02G392200/TraesCS5A02G382800	11	BP
GO:0034250	positive regulation of cellular amide metabolic process	11/3745	114/107890	0.00211137	0.0907893	0.0852036	TraesCS7A02G262400/TraesCS6D02G223400/TraesCS6D02G266800/TraesCS6B02G083500/TraesCS7A02G252300/TraesCS6B02G421000/TraesCS6B02G463000/TraesCS6B02G238900/TraesCS3A02G274400/TraesCS6B02G411200/TraesCS1A02G340100	11	BP
GO:0051480	regulation of cytosolic calcium ion concentration	5/3745	27/107890	0.00214191	0.0907893	0.0852036	TraesCS6D02G187200/TraesCS6D02G211700/TraesCS6B02G344100/TraesCS4A02G405400/TraesCS6B02G224100	5	BP
GO:0030198	extracellular matrix organization	11/3745	116/107890	0.00242281	0.0981018	0.0920662	TraesCS7A02G221500/TraesCS3B02G162400/TraesCS5B02G159100/TraesCS6B02G241000/TraesCS2A02G175000/TraesCS5D02G107900/TraesCS5B02G101400/TraesCS6B02G418400/TraesCS5A02G095200/TraesCS2D02G182400/TraesCS2B02G201400	11	BP
GO:0043062	extracellular structure organization	11/3745	116/107890	0.00242281	0.0981018	0.0920662	TraesCS7A02G221500/TraesCS3B02G162400/TraesCS5B02G159100/TraesCS6B02G241000/TraesCS2A02G175000/TraesCS5D02G107900/TraesCS5B02G101400/TraesCS6B02G418400/TraesCS5A02G095200/TraesCS2D02G182400/TraesCS2B02G201400	11	BP
GO:0070726	cell wall assembly	8/3745	68/107890	0.00242641	0.0981018	0.0920662	TraesCS5B02G159100/TraesCS2A02G175000/TraesCS5D02G107900/TraesCS5B02G101400/TraesCS6B02G418400/TraesCS5A02G095200/TraesCS2D02G182400/TraesCS2B02G201400	8	BP
GO:0031060	regulation of histone methylation	7/3745	54/107890	0.00256175	0.102004	0.0957285	TraesCS6D02G196000/TraesCS4A02G372200/TraesCS7D02G069700/TraesCS7A02G074600/TraesCS4D02G145700/TraesCS6B02G350800/TraesCS7B02G175400	7	BP
GO:0036293	response to decreased oxygen levels	26/3745	412/107890	0.00283023	0.111012	0.104183	TraesCS6D02G254700/TraesCS6D02G250800/TraesCS6D02G358000/TraesCS6D02G287000/TraesCS7B02G283000/TraesCS2D02G034400/TraesCS7B02G093800/TraesCS3B02G119800/TraesCS6B02G450700/TraesCS6B02G336400/TraesCS6B02G430100/TraesCS4B02G175100/TraesCS5D02G031600/TraesCS5A02G025200/TraesCS6B02G411500/TraesCS5D02G320800/TraesCS3D02G091700/TraesCS5B02G315500/TraesCS2D02G110000/TraesCS6D02G080500/TraesCS6A02G091700/…	26	BP
GO:0010116	positive regulation of abscisic acid biosynthetic process	4/3745	18/107890	0.00300088	0.115975	0.10884	TraesCS4B02G095400/TraesCS3A02G289900/TraesCS3D02G289600/TraesCS3B02G324500	4	BP
GO:0070482	response to oxygen levels	26/3745	415/107890	0.00311597	0.116948	0.109753	TraesCS6D02G254700/TraesCS6D02G250800/TraesCS6D02G358000/TraesCS6D02G287000/TraesCS7B02G283000/TraesCS2D02G034400/TraesCS7B02G093800/TraesCS3B02G119800/TraesCS6B02G450700/TraesCS6B02G336400/TraesCS6B02G430100/TraesCS4B02G175100/TraesCS5D02G031600/TraesCS5A02G025200/TraesCS6B02G411500/TraesCS5D02G320800/TraesCS3D02G091700/TraesCS5B02G315500/TraesCS2D02G110000/TraesCS6D02G080500/TraesCS6A02G091700/…	26	BP
GO:0055074	calcium ion homeostasis	11/3745	120/107890	0.00315705	0.116948	0.109753	TraesCS6D02G204000/TraesCS6D02G187200/TraesCS6D02G211700/TraesCS5B02G462600/TraesCS6B02G344100/TraesCS4A02G405400/TraesCS2D02G356300/TraesCS6B02G250200/TraesCS6B02G224100/TraesCS6B02G382300/TraesCS6B02G382500	11	BP
GO:0090376	seed trichome differentiation	7/3745	56/107890	0.00315955	0.116948	0.109753	TraesCS3D02G105500/TraesCS3B02G120700/TraesCS6B02G447600/TraesCS3A02G103100/TraesCS5D02G269300/TraesCS3A02G246600/TraesCS3D02G244900	7	BP
GO:0031397	negative regulation of protein ubiquitination	5/3745	30/107890	0.00346903	0.125844	0.118102	TraesCS6D02G190300/TraesCS6D02G391200/TraesCS6B02G452500/TraesCS6B02G452700/TraesCS6B02G225400	5	BP
GO:0009061	anaerobic respiration	7/3745	57/107890	0.00349567	0.125844	0.118102	TraesCS6D02G250800/TraesCS5D02G031600/TraesCS5A02G025200/TraesCS1A02G416700/TraesCS1B02G446900/TraesCS1D02G424500/TraesCS5D02G504200	7	BP
GO:1902932	positive regulation of alcohol biosynthetic process	4/3745	19/107890	0.00369748	0.13131	0.123232	TraesCS4B02G095400/TraesCS3A02G289900/TraesCS3D02G289600/TraesCS3B02G324500	4	BP
GO:0042398	cellular modified amino acid biosynthetic process	28/3745	465/107890	0.00385342	0.133707	0.125481	TraesCS7A02G265300/TraesCS7A02G265200/TraesCS6D02G360400/TraesCS6D02G260500/TraesCS7A02G276800/TraesCS7A02G276900/TraesCS6D02G383200/TraesCS7A02G252100/TraesCS6B02G408100/TraesCS6B02G258400/TraesCS6A02G222900/TraesCS6A02G222800/TraesCS6B02G455100/TraesCS6B02G258500/TraesCS2D02G204400/TraesCS2A02G380800/TraesCS2D02G377200/TraesCS2B02G398000/TraesCS3D02G167700/TraesCS3B02G612000/TraesCS6B02G439300/…	28	BP
GO:0060249	anatomical structure homeostasis	27/3745	444/107890	0.00393192	0.133707	0.125481	TraesCS7A02G258600/TraesCS6D02G327900/TraesCS6D02G378100/TraesCS6D02G315400/TraesCS6D02G302200/TraesCS6D02G196000/TraesCS6B02G311300/TraesCS3A02G145600/TraesCS1B02G328200/TraesCS6D02G092000/TraesCS1A02G126600/TraesCS7B02G121400/TraesCS3A02G486100/TraesCS7B02G254500/TraesCS4B02G358500/TraesCS3A02G211500/TraesCS6B02G333700/TraesCS6B02G366400/TraesCS6B02G356900/TraesCS6B02G399000/TraesCS6B02G351900/…	27	BP
GO:0007007	inner mitochondrial membrane organization	6/3745	44/107890	0.00396752	0.133707	0.125481	TraesCS6D02G200200/TraesCS7D02G155900/TraesCS6D02G240500/TraesCS7A02G262900/TraesCS1B02G259000/TraesCS6B02G247500	6	BP
GO:0045793	positive regulation of cell size	5/3745	31/107890	0.00401936	0.133707	0.125481	TraesCS6D02G057900/TraesCS1B02G247700/TraesCS6B02G235200/TraesCS6A02G189800/TraesCS6B02G418600	5	BP
GO:1901409	positive regulation of phosphorylation of RNA polymerase II C-terminal domain	5/3745	31/107890	0.00401936	0.133707	0.125481	TraesCS6D02G332100/TraesCS4B02G116000/TraesCS6B02G362300/TraesCS4B02G115800/TraesCS6B02G382700	5	BP
GO:0045727	positive regulation of translation	10/3745	107/107890	0.00415291	0.133775	0.125545	TraesCS6D02G223400/TraesCS6D02G266800/TraesCS6B02G083500/TraesCS7A02G252300/TraesCS6B02G421000/TraesCS6B02G463000/TraesCS6B02G238900/TraesCS3A02G274400/TraesCS6B02G411200/TraesCS1A02G340100	10	BP
GO:0009722	detection of cytokinin stimulus	3/3745	10/107890	0.00417412	0.133775	0.125545	TraesCS4D02G341000/TraesCS4B02G346100/TraesCS5A02G515000	3	BP
GO:0090239	regulation of histone H4 acetylation	3/3745	10/107890	0.00417412	0.133775	0.125545	TraesCS4A02G372200/TraesCS7D02G069700/TraesCS7A02G074600	3	BP
GO:0045489	pectin biosynthetic process	13/3745	161/107890	0.0042508	0.134592	0.126311	TraesCS7D02G140800/TraesCS7A02G139400/TraesCS6D02G303000/TraesCS7B02G041200/TraesCS1B02G253400/TraesCS6B02G348700/TraesCS5B02G152100/TraesCS4A02G110000/TraesCS1D02G228100/TraesCS4D02G195000/TraesCS4B02G194100/TraesCS1A02G226700/TraesCS3B02G382900	13	BP
GO:0048510	regulation of timing of transition from vegetative to reproductive phase	11/3745	125/107890	0.00431513	0.135002	0.126696	TraesCS6D02G293200/TraesCS1A02G199900/TraesCS3A02G432900/TraesCS3D02G427900/TraesCS3A02G434900/TraesCS7D02G261900/TraesCS4B02G288000/TraesCS3D02G428000/TraesCS7D02G176700/TraesCS6B02G343900/TraesCS4A02G409200	11	BP
GO:0019375	galactolipid biosynthetic process	26/3745	426/107890	0.00438131	0.13546	0.127126	TraesCS6D02G183200/TraesCS7A02G231200/TraesCS3D02G055400/TraesCS6D02G252900/TraesCS6D02G287000/TraesCS6D02G311300/TraesCS6D02G211900/TraesCS6D02G360800/TraesCS6D02G364600/TraesCS2A02G169600/TraesCS7A02G226000/TraesCS7B02G093800/TraesCS4A02G212800/TraesCS7B02G478000/TraesCS3A02G055500/TraesCS1B02G253500/TraesCS1B02G264000/TraesCS6B02G404700/TraesCS6B02G336400/TraesCS6B02G334300/TraesCS6B02G413500/…	26	BP
GO:0019374	galactolipid metabolic process	26/3745	427/107890	0.00451511	0.137973	0.129485	TraesCS6D02G183200/TraesCS7A02G231200/TraesCS3D02G055400/TraesCS6D02G252900/TraesCS6D02G287000/TraesCS6D02G311300/TraesCS6D02G211900/TraesCS6D02G360800/TraesCS6D02G364600/TraesCS2A02G169600/TraesCS7A02G226000/TraesCS7B02G093800/TraesCS4A02G212800/TraesCS7B02G478000/TraesCS3A02G055500/TraesCS1B02G253500/TraesCS1B02G264000/TraesCS6B02G404700/TraesCS6B02G336400/TraesCS6B02G334300/TraesCS6B02G413500/…	26	BP
GO:0006383	transcription by RNA polymerase III	11/3745	126/107890	0.00458281	0.138248	0.129743	TraesCS6D02G213900/TraesCS6D02G309500/TraesCS7A02G262100/TraesCS4B02G071600/TraesCS6D02G236300/TraesCS1B02G248100/TraesCS1B02G250000/TraesCS4D02G136700/TraesCSU02G088100/TraesCS6B02G361300/TraesCS6B02G399300	11	BP
GO:0000304	response to singlet oxygen	5/3745	32/107890	0.00462932	0.138248	0.129743	TraesCS6D02G187200/TraesCS6D02G211700/TraesCS6D02G311300/TraesCS6B02G224100/TraesCS6B02G362800	5	BP
GO:0030245	cellulose catabolic process	9/3745	92/107890	0.0047317	0.138927	0.130379	TraesCS4B02G104500/TraesCS7D02G201000/TraesCS4B02G173200/TraesCS6B02G342600/TraesCS6A02G122100/TraesCS6A02G312400/TraesCS7A02G197900/TraesCS7B02G104600/TraesCS6B02G150300	9	BP
GO:0031627	telomeric loop formation	8/3745	76/107890	0.00485523	0.138927	0.130379	TraesCS7A02G258600/TraesCS6D02G327900/TraesCS6D02G378100/TraesCS3A02G211500/TraesCS6B02G432500/TraesCS6B02G431500/TraesCS6B02G378200/TraesCS6B02G419100	8	BP
GO:0046885	regulation of hormone biosynthetic process	8/3745	76/107890	0.00485523	0.138927	0.130379	TraesCS6D02G358000/TraesCS6D02G241900/TraesCS6D02G335000/TraesCS6B02G385200/TraesCS6B02G226200/TraesCS6B02G411500/TraesCS6D02G080500/TraesCS6A02G091700	8	BP
GO:0048506	regulation of timing of meristematic phase transition	11/3745	127/107890	0.00486349	0.138927	0.130379	TraesCS6D02G293200/TraesCS1A02G199900/TraesCS3A02G432900/TraesCS3D02G427900/TraesCS3A02G434900/TraesCS7D02G261900/TraesCS4B02G288000/TraesCS3D02G428000/TraesCS7D02G176700/TraesCS6B02G343900/TraesCS4A02G409200	11	BP
GO:0007006	mitochondrial membrane organization	9/3745	93/107890	0.00508069	0.143099	0.134295	TraesCS6D02G200200/TraesCS7A02G282000/TraesCS7D02G155900/TraesCS6D02G240500/TraesCS7A02G262900/TraesCS1B02G199200/TraesCS1B02G259000/TraesCS6B02G247500/TraesCS3D02G166000	9	BP
GO:0009299	mRNA transcription	7/3745	61/107890	0.00511845	0.143099	0.134295	TraesCS6B02G113100/TraesCS6D02G361900/TraesCS1D02G208400/TraesCS1A02G205100/TraesCS1B02G218700/TraesCS6B02G414700/TraesCS6B02G336900	7	BP
GO:0034605	cellular response to heat	16/3745	223/107890	0.00522193	0.144455	0.135568	TraesCS7A02G210900/TraesCS6D02G266800/TraesCS2D02G034400/TraesCS3D02G510200/TraesCS6B02G083500/TraesCS6B02G228100/TraesCS2D02G276000/TraesCS1D02G072900/TraesCS3D02G273600/TraesCS3A02G274400/TraesCS3B02G308100/TraesCS6A02G330500/TraesCS1D02G342100/TraesCS1A02G340100/TraesCS1B02G352400/TraesCS6D02G309600	16	BP
GO:0032496	response to lipopolysaccharide	4/3745	21/107890	0.00540287	0.147904	0.138804	TraesCS7B02G283000/TraesCS6B02G425700/TraesCS6B02G350800/TraesCS2B02G429300	4	BP
GO:0010398	xylogalacturonan metabolic process	3/3745	11/107890	0.00559199	0.151503	0.142182	TraesCS7D02G140800/TraesCS7A02G139400/TraesCS7B02G041200	3	BP
GO:0018208	peptidyl-proline modification	17/3745	245/107890	0.00567224	0.152109	0.14275	TraesCS7A02G279300/TraesCS7A02G222800/TraesCS6D02G293100/TraesCS6D02G352100/TraesCS6D02G257200/TraesCS7A02G266500/TraesCS6B02G344100/TraesCS6B02G404500/TraesCS6B02G233500/TraesCS2A02G277100/TraesCS2D02G276000/TraesCS6B02G343800/TraesCS3A02G209000/TraesCS7B02G175400/TraesCS7A02G419600/TraesCS6B02G331700/TraesCS2B02G294500	17	BP
GO:0006102	isocitrate metabolic process	5/3745	34/107890	0.00604143	0.159478	0.149666	TraesCS6D02G192900/TraesCS7A02G219100/TraesCS6B02G440200/TraesCS6B02G235000/TraesCS6B02G238500	5	BP
GO:0034243	regulation of transcription elongation from RNA polymerase II promoter	7/3745	63/107890	0.00611529	0.159478	0.149666	TraesCS6D02G304800/TraesCS6D02G215900/TraesCS4D02G145700/TraesCS4B02G116000/TraesCS6B02G350800/TraesCS4B02G115800/TraesCS6B02G355400	7	BP
GO:0010102	lateral root morphogenesis	22/3745	351/107890	0.00612911	0.159478	0.149666	TraesCS6D02G185800/TraesCS6D02G294600/TraesCS6D02G216400/TraesCS6D02G390100/TraesCS6D02G335000/TraesCS7A02G207400/TraesCS1B02G275600/TraesCS1D02G081300/TraesCS6B02G227700/TraesCS3D02G162700/TraesCS6B02G399500/TraesCS6B02G385200/TraesCS6B02G226200/TraesCS3A02G108400/TraesCS6B02G451200/TraesCS4D02G112900/TraesCS4D02G360100/TraesCS6B02G345800/TraesCS4B02G115200/TraesCS7B02G114400/TraesCS4A02G067300/…	22	BP
GO:0010101	post-embryonic root morphogenesis	22/3745	352/107890	0.00632899	0.162334	0.152347	TraesCS6D02G185800/TraesCS6D02G294600/TraesCS6D02G216400/TraesCS6D02G390100/TraesCS6D02G335000/TraesCS7A02G207400/TraesCS1B02G275600/TraesCS1D02G081300/TraesCS6B02G227700/TraesCS3D02G162700/TraesCS6B02G399500/TraesCS6B02G385200/TraesCS6B02G226200/TraesCS3A02G108400/TraesCS6B02G451200/TraesCS4D02G112900/TraesCS4D02G360100/TraesCS6B02G345800/TraesCS4B02G115200/TraesCS7B02G114400/TraesCS4A02G067300/…	22	BP
GO:0042407	cristae formation	4/3745	22/107890	0.00642419	0.162334	0.152347	TraesCS6D02G200200/TraesCS7D02G155900/TraesCS1B02G259000/TraesCS6B02G247500	4	BP
GO:0045948	positive regulation of translational initiation	4/3745	22/107890	0.00642419	0.162334	0.152347	TraesCS6D02G266800/TraesCS6B02G083500/TraesCS7A02G252300/TraesCS6B02G421000	4	BP
GO:0006595	polyamine metabolic process	20/3745	311/107890	0.00661614	0.165236	0.15507	TraesCS7A02G265300/TraesCS7A02G265200/TraesCS7A02G220000/TraesCS6D02G202500/TraesCS6D02G260500/TraesCS6D02G202400/TraesCS6B02G258400/TraesCS6A02G222900/TraesCS6A02G222800/TraesCS6B02G258500/TraesCS2D02G204400/TraesCS2A02G380800/TraesCS2D02G377200/TraesCS2B02G398000/TraesCS3B02G612000/TraesCS2B02G398400/TraesCS1B02G456200/TraesCS2B02G398200/TraesCS2B02G224300/TraesCS1D02G012300	20	BP
GO:0032943	mononuclear cell proliferation	7/3745	64/107890	0.00666475	0.165236	0.15507	TraesCS7A02G262700/TraesCS6D02G276500/TraesCS1B02G244500/TraesCS2D02G480300/TraesCS6B02G344100/TraesCS7A02G419900/TraesCS4D02G091500	7	BP
GO:0010226	response to lithium ion	6/3745	49/107890	0.00678874	0.166736	0.156478	TraesCS6D02G206800/TraesCS4B02G275300/TraesCS6B02G427200/TraesCS1A02G145300/TraesCS1D02G144200/TraesCS1B02G162500	6	BP
GO:0051275	beta-glucan catabolic process	9/3745	98/107890	0.00713416	0.168956	0.158561	TraesCS4B02G104500/TraesCS7D02G201000/TraesCS4B02G173200/TraesCS6B02G342600/TraesCS6A02G122100/TraesCS6A02G312400/TraesCS7A02G197900/TraesCS7B02G104600/TraesCS6B02G150300	9	BP
GO:0010617	circadian regulation of calcium ion oscillation	3/3745	12/107890	0.00726484	0.168956	0.158561	TraesCS6D02G187200/TraesCS6D02G211700/TraesCS6B02G224100	3	BP
GO:0014071	response to cycloalkane	3/3745	12/107890	0.00726484	0.168956	0.158561	TraesCS6D02G211900/TraesCS6D02G360800/TraesCS6B02G413500	3	BP
GO:0070370	cellular heat acclimation	3/3745	12/107890	0.00726484	0.168956	0.158561	TraesCS7A02G210900/TraesCS2D02G276000/TraesCS1D02G072900	3	BP
GO:0070966	nuclear-transcribed mRNA catabolic process, no-go decay	3/3745	12/107890	0.00726484	0.168956	0.158561	TraesCS6D02G334300/TraesCS6D02G334800/TraesCS6D02G334500	3	BP
GO:1902884	positive regulation of response to oxidative stress	3/3745	12/107890	0.00726484	0.168956	0.158561	TraesCS6D02G320800/TraesCS6D02G203800/TraesCS6B02G371500	3	BP
GO:0030912	response to deep water	4/3745	23/107890	0.00756575	0.169938	0.159483	TraesCS4A02G212800/TraesCS6B02G404700/TraesCS6A02G271300/TraesCS6B02G298500	4	BP
GO:0032201	telomere maintenance via semi-conservative replication	4/3745	23/107890	0.00756575	0.169938	0.159483	TraesCS6D02G315400/TraesCS6D02G302200/TraesCS6B02G366400/TraesCS6B02G353100	4	BP
GO:0032876	negative regulation of DNA endoreduplication	4/3745	23/107890	0.00756575	0.169938	0.159483	TraesCS6D02G291000/TraesCS6D02G354500/TraesCS6B02G341900/TraesCS6B02G407600	4	BP
GO:0046516	hypusine metabolic process	4/3745	23/107890	0.00756575	0.169938	0.159483	TraesCS6D02G360400/TraesCS6D02G383200/TraesCS6B02G439300/TraesCS6B02G411200	4	BP
GO:1901407	regulation of phosphorylation of RNA polymerase II C-terminal domain	5/3745	36/107890	0.0077315	0.17219	0.161596	TraesCS6D02G332100/TraesCS4B02G116000/TraesCS6B02G362300/TraesCS4B02G115800/TraesCS6B02G382700	5	BP
GO:0010022	meristem determinacy	8/3745	83/107890	0.00822003	0.181531	0.170363	TraesCS6D02G240200/TraesCS6D02G293100/TraesCS6D02G293200/TraesCS2B02G300500/TraesCS2D02G442200/TraesCS7D02G176700/TraesCS6B02G343800/TraesCS6B02G343900	8	BP
GO:0070661	leukocyte proliferation	7/3745	67/107890	0.00853346	0.186883	0.175385	TraesCS7A02G262700/TraesCS6D02G276500/TraesCS1B02G244500/TraesCS2D02G480300/TraesCS6B02G344100/TraesCS7A02G419900/TraesCS4D02G091500	7	BP
GO:0042391	regulation of membrane potential	9/3745	101/107890	0.00863923	0.187163	0.175648	TraesCS6D02G293100/TraesCS1B02G278600/TraesCS6B02G421000/TraesCS6B02G377200/TraesCS6B02G344100/TraesCS6B02G354200/TraesCS6B02G343800/TraesCS3D02G166000/TraesCS4D02G305100	9	BP
GO:0045737	positive regulation of cyclin-dependent protein serine/threonine kinase activity	5/3745	37/107890	0.00868867	0.187163	0.175648	TraesCS6D02G332100/TraesCS4B02G116000/TraesCS6B02G362300/TraesCS4B02G115800/TraesCS6B02G382700	5	BP
GO:0008612	peptidyl-lysine modification to peptidyl-hypusine	4/3745	24/107890	0.00883302	0.188725	0.177114	TraesCS6D02G360400/TraesCS6D02G383200/TraesCS6B02G439300/TraesCS6B02G411200	4	BP
GO:2000652	regulation of secondary cell wall biogenesis	6/3745	52/107890	0.00905463	0.188942	0.177317	TraesCS6D02G274900/TraesCS4D02G341000/TraesCS4B02G346100/TraesCS5A02G515000/TraesCS2D02G444200/TraesCS3D02G220700	6	BP
GO:0046505	sulfolipid metabolic process	3/3745	13/107890	0.00920263	0.188942	0.177317	TraesCS3D02G055400/TraesCS3A02G055500/TraesCS1B02G253500	3	BP
GO:0046506	sulfolipid biosynthetic process	3/3745	13/107890	0.00920263	0.188942	0.177317	TraesCS3D02G055400/TraesCS3A02G055500/TraesCS1B02G253500	3	BP
GO:0051569	regulation of histone H3-K4 methylation	3/3745	13/107890	0.00920263	0.188942	0.177317	TraesCS6D02G196000/TraesCS4D02G145700/TraesCS6B02G350800	3	BP
GO:0070481	nuclear-transcribed mRNA catabolic process, non-stop decay	3/3745	13/107890	0.00920263	0.188942	0.177317	TraesCS6D02G334300/TraesCS6D02G334800/TraesCS6D02G334500	3	BP
GO:0032508	DNA duplex unwinding	16/3745	238/107890	0.00950519	0.193641	0.181727	TraesCS6D02G344100/TraesCS6D02G235600/TraesCS6D02G251900/TraesCS6D02G320500/TraesCS4A02G372200/TraesCS7D02G069700/TraesCS3A02G145600/TraesCS7A02G074600/TraesCS1B02G273000/TraesCS1B02G273100/TraesCS1A02G126600/TraesCS1B02G274600/TraesCS7B02G254500/TraesCS6B02G393500/TraesCS4D02G133500/TraesCS6B02G371000	16	BP
GO:0051304	chromosome separation	14/3745	198/107890	0.0097122	0.195087	0.183084	TraesCS6D02G191700/TraesCS6D02G233200/TraesCS6D02G327000/TraesCS6D02G354500/TraesCS7A02G155100/TraesCS1B02G244100/TraesCS4B02G308700/TraesCS6A02G309600/TraesCS6B02G356900/TraesCS6B02G236700/TraesCS4D02G106800/TraesCS6B02G377000/TraesCS6B02G265900/TraesCS6B02G407600	14	BP
GO:0031062	positive regulation of histone methylation	5/3745	38/107890	0.00972465	0.195087	0.183084	TraesCS4A02G372200/TraesCS7D02G069700/TraesCS7A02G074600/TraesCS4D02G145700/TraesCS6B02G350800	5	BP
GO:0008295	spermidine biosynthetic process	6/3745	53/107890	0.00991724	0.197443	0.185296	TraesCS7A02G265300/TraesCS7A02G265200/TraesCS7A02G220000/TraesCS6D02G202500/TraesCS6D02G202400/TraesCS1D02G012300	6	BP
GO:0036473	cell death in response to oxidative stress	4/3745	25/107890	0.0102311	0.20216	0.189723	TraesCS6D02G187200/TraesCS6D02G211700/TraesCS6B02G224100/TraesCS2A02G396400	4	BP
GO:0032786	positive regulation of DNA-templated transcription, elongation	6/3745	54/107890	0.0108367	0.209513	0.196623	TraesCS6D02G304800/TraesCS6D02G311700/TraesCS4D02G145700/TraesCS6B02G350800/TraesCS6B02G355400/TraesCS6B02G363200	6	BP
GO:0016103	diterpenoid catabolic process	5/3745	39/107890	0.0108424	0.209513	0.196623	TraesCS4D02G121000/TraesCS1D02G302500/TraesCS1A02G303100/TraesCS1A02G126400/TraesCS1D02G127000	5	BP
GO:0045487	gibberellin catabolic process	5/3745	39/107890	0.0108424	0.209513	0.196623	TraesCS4D02G121000/TraesCS1D02G302500/TraesCS1A02G303100/TraesCS1A02G126400/TraesCS1D02G127000	5	BP
GO:0009631	cold acclimation	13/3745	181/107890	0.0109851	0.210721	0.197757	TraesCS6D02G311300/TraesCS6D02G328800/TraesCS6D02G238200/TraesCS1B02G273000/TraesCS1B02G273100/TraesCS5D02G379300/TraesCS6B02G462300/TraesCS1A02G268800/TraesCS6B02G379500/TraesCS6B02G362800/TraesCS2D02G308900/TraesCS2A02G310700/TraesCS2D02G444200	13	BP
GO:0010343	singlet oxygen-mediated programmed cell death	3/3745	14/107890	0.0114133	0.212859	0.199764	TraesCS6D02G187200/TraesCS6D02G211700/TraesCS6B02G224100	3	BP
GO:0046898	response to cycloheximide	3/3745	14/107890	0.0114133	0.212859	0.199764	TraesCS6D02G211900/TraesCS6D02G360800/TraesCS6B02G413500	3	BP
GO:0030071	regulation of mitotic metaphase/anaphase transition	10/3745	124/107890	0.0114205	0.212859	0.199764	TraesCS6D02G191700/TraesCS6D02G233200/TraesCS6D02G327000/TraesCS6D02G354500/TraesCS7A02G155100/TraesCS4B02G308700/TraesCS6A02G309600/TraesCS6B02G236700/TraesCS6B02G377000/TraesCS6B02G407600	10	BP
GO:1902099	regulation of metaphase/anaphase transition of cell cycle	10/3745	124/107890	0.0114205	0.212859	0.199764	TraesCS6D02G191700/TraesCS6D02G233200/TraesCS6D02G327000/TraesCS6D02G354500/TraesCS7A02G155100/TraesCS4B02G308700/TraesCS6A02G309600/TraesCS6B02G236700/TraesCS6B02G377000/TraesCS6B02G407600	10	BP
GO:0045828	positive regulation of isoprenoid metabolic process	4/3745	26/107890	0.0117647	0.214795	0.20158	TraesCS4B02G095400/TraesCS3A02G289900/TraesCS3D02G289600/TraesCS3B02G324500	4	BP
GO:1904031	positive regulation of cyclin-dependent protein kinase activity	6/3745	55/107890	0.0118148	0.214795	0.20158	TraesCS6D02G332100/TraesCS4B02G116000/TraesCS6B02G362300/TraesCS4B02G115800/TraesCS6B02G382700/TraesCS1B02G375400	6	BP
GO:2000030	regulation of response to red or far red light	12/3745	163/107890	0.0118425	0.214795	0.20158	TraesCS6D02G202000/TraesCS6D02G305800/TraesCS6D02G391200/TraesCS6A02G216400/TraesCS1B02G244300/TraesCS6B02G356400/TraesCS6B02G452500/TraesCS6B02G452700/TraesCS3A02G210100/TraesCS5D02G392200/TraesCS5A02G382800/TraesCS4D02G121300	12	BP
GO:0032392	DNA geometric change	16/3745	244/107890	0.0118513	0.214795	0.20158	TraesCS6D02G344100/TraesCS6D02G235600/TraesCS6D02G251900/TraesCS6D02G320500/TraesCS4A02G372200/TraesCS7D02G069700/TraesCS3A02G145600/TraesCS7A02G074600/TraesCS1B02G273000/TraesCS1B02G273100/TraesCS1A02G126600/TraesCS1B02G274600/TraesCS7B02G254500/TraesCS6B02G393500/TraesCS4D02G133500/TraesCS6B02G371000	16	BP
GO:0045787	positive regulation of cell cycle	16/3745	245/107890	0.012283	0.221095	0.207492	TraesCS7A02G255400/TraesCS6D02G195300/TraesCS6D02G305800/TraesCS6D02G304300/TraesCS6D02G332100/TraesCS6D02G192000/TraesCS6B02G354900/TraesCS6B02G233700/TraesCS4B02G116000/TraesCS6B02G362300/TraesCS4B02G115800/TraesCS6B02G356900/TraesCS6B02G382700/TraesCS6B02G356400/TraesCS7B02G216700/TraesCS7D02G312700	16	BP
GO:0016115	terpenoid catabolic process	7/3745	72/107890	0.0124624	0.221372	0.207752	TraesCS6A02G271300/TraesCS4D02G121000/TraesCS6B02G298500/TraesCS1D02G302500/TraesCS1A02G303100/TraesCS1A02G126400/TraesCS1D02G127000	7	BP
GO:0051329	mitotic interphase	26/3745	464/107890	0.0124669	0.221372	0.207752	TraesCS6D02G195300/TraesCS6D02G188600/TraesCS6D02G315400/TraesCS7A02G261300/TraesCS6D02G324300/TraesCS6D02G386100/TraesCS6D02G384500/TraesCS6D02G302200/TraesCS6D02G341300/TraesCS7A02G213600/TraesCS6D02G233200/TraesCS6D02G196000/TraesCS6D02G327000/TraesCS3B02G487900/TraesCS1B02G266900/TraesCS7A02G246000/TraesCS1A02G308300/TraesCS6B02G440500/TraesCS6B02G444700/TraesCS6B02G350800/TraesCS6B02G391200/…	26	BP
GO:1901616	organic hydroxy compound catabolic process	21/3745	353/107890	0.0126167	0.222529	0.208838	TraesCS6D02G195700/TraesCS6D02G331100/TraesCS5D02G080200/TraesCS7A02G226000/TraesCS1B02G270000/TraesCS6B02G258400/TraesCS6A02G222900/TraesCS6A02G222800/TraesCS6A02G271300/TraesCS6B02G374700/TraesCS6B02G258500/TraesCS3A02G408700/TraesCS6B02G298500/TraesCS2A02G380800/TraesCS2D02G377200/TraesCS2B02G398000/TraesCS6B02G331600/TraesCS2B02G398400/TraesCS6B02G330300/TraesCS2B02G398200/TraesCS2B02G224300	21	BP
GO:0009749	response to glucose	24/3745	421/107890	0.0131356	0.230135	0.215976	TraesCS6D02G183200/TraesCS6D02G219900/TraesCS5A02G153900/TraesCS7B02G283000/TraesCS6D02G300400/TraesCS7A02G067700/TraesCS6B02G421000/TraesCS6A02G298100/TraesCS6B02G235000/TraesCS6B02G344100/TraesCS6B02G415700/TraesCS3D02G164400/TraesCS5B02G155400/TraesCS7A02G483700/TraesCS7D02G471300/TraesCS6B02G456400/TraesCS5B02G155600/TraesCS4B02G174900/TraesCS6B02G382300/TraesCS7B02G387100/TraesCS6B02G342700/…	24	BP
GO:0033045	regulation of sister chromatid segregation	11/3745	146/107890	0.0132673	0.230641	0.216452	TraesCS6D02G191700/TraesCS6D02G233200/TraesCS6D02G327000/TraesCS6D02G354500/TraesCS7A02G155100/TraesCS4B02G308700/TraesCS6A02G309600/TraesCS6B02G356900/TraesCS6B02G236700/TraesCS6B02G377000/TraesCS6B02G407600	11	BP
GO:0018198	peptidyl-cysteine modification	4/3745	27/107890	0.0134383	0.230641	0.216452	TraesCS6B02G425700/TraesCS6B02G238600/TraesCS7A02G419600/TraesCS4D02G305100	4	BP
GO:0051325	interphase	26/3745	468/107890	0.013767	0.230641	0.216452	TraesCS6D02G195300/TraesCS6D02G188600/TraesCS6D02G315400/TraesCS7A02G261300/TraesCS6D02G324300/TraesCS6D02G386100/TraesCS6D02G384500/TraesCS6D02G302200/TraesCS6D02G341300/TraesCS7A02G213600/TraesCS6D02G233200/TraesCS6D02G196000/TraesCS6D02G327000/TraesCS3B02G487900/TraesCS1B02G266900/TraesCS7A02G246000/TraesCS1A02G308300/TraesCS6B02G440500/TraesCS6B02G444700/TraesCS6B02G350800/TraesCS6B02G391200/…	26	BP
GO:0006531	aspartate metabolic process	3/3745	15/107890	0.013903	0.230641	0.216452	TraesCS6D02G344200/TraesCS6D02G370600/TraesCS6B02G393600	3	BP
GO:0015790	UDP-xylose transmembrane transport	3/3745	15/107890	0.013903	0.230641	0.216452	TraesCS2A02G380500/TraesCS2D02G376800/TraesCS2B02G397500	3	BP
GO:0017014	protein nitrosylation	3/3745	15/107890	0.013903	0.230641	0.216452	TraesCS6B02G425700/TraesCS6B02G238600/TraesCS7A02G419600	3	BP
GO:0018119	peptidyl-cysteine S-nitrosylation	3/3745	15/107890	0.013903	0.230641	0.216452	TraesCS6B02G425700/TraesCS6B02G238600/TraesCS7A02G419600	3	BP
GO:0052889	9,9'-di-cis-zeta-carotene desaturation to 7,9,7',9'-tetra-cis-lycopene	8/3745	91/107890	0.0139233	0.230641	0.216452	TraesCS6D02G251800/TraesCS6D02G206800/TraesCS1B02G273500/TraesCS6B02G427200/TraesCS1A02G145300/TraesCS5B02G164400/TraesCS5A02G167400/TraesCS1B02G162500	8	BP
GO:0045003	double-strand break repair via synthesis-dependent strand annealing	6/3745	57/107890	0.0139543	0.230641	0.216452	TraesCS6D02G301000/TraesCS6D02G315400/TraesCS6B02G352000/TraesCS6B02G366400/TraesCS6B02G351900/TraesCS6B02G351800	6	BP
GO:0070816	phosphorylation of RNA polymerase II C-terminal domain	5/3745	42/107890	0.0147135	0.241669	0.226801	TraesCS6D02G332100/TraesCS4B02G116000/TraesCS6B02G362300/TraesCS4B02G115800/TraesCS6B02G382700	5	BP
GO:0006297	nucleotide-excision repair, DNA gap filling	4/3745	28/107890	0.0152557	0.243352	0.22838	TraesCS6D02G315400/TraesCS6D02G302200/TraesCS6B02G366400/TraesCS6B02G353100	4	BP
GO:0019632	shikimate metabolic process	4/3745	28/107890	0.0152557	0.243352	0.22838	TraesCS2A02G523400/TraesCS2D02G525500/TraesCS6B02G333600/TraesCS2B02G553300	4	BP
GO:2000104	negative regulation of DNA-dependent DNA replication	4/3745	28/107890	0.0152557	0.243352	0.22838	TraesCS6D02G291000/TraesCS6D02G354500/TraesCS6B02G341900/TraesCS6B02G407600	4	BP
GO:0008300	isoprenoid catabolic process	7/3745	75/107890	0.0153656	0.243352	0.22838	TraesCS6A02G271300/TraesCS4D02G121000/TraesCS6B02G298500/TraesCS1D02G302500/TraesCS1A02G303100/TraesCS1A02G126400/TraesCS1D02G127000	7	BP
GO:0051438	regulation of ubiquitin-protein transferase activity	7/3745	75/107890	0.0153656	0.243352	0.22838	TraesCS6D02G190300/TraesCS6D02G391200/TraesCS6D02G354500/TraesCS6B02G402400/TraesCS6B02G452500/TraesCS6B02G452700/TraesCS6B02G225400	7	BP
GO:0043650	dicarboxylic acid biosynthetic process	9/3745	111/107890	0.0154234	0.243352	0.22838	TraesCS7A02G276800/TraesCS7A02G278400/TraesCS7A02G276900/TraesCS2A02G523400/TraesCS3D02G167700/TraesCS2D02G525500/TraesCS6B02G333600/TraesCS7B02G175800/TraesCS2B02G553300	9	BP
GO:0006346	DNA methylation-dependent heterochromatin assembly	25/3745	450/107890	0.0154641	0.243352	0.22838	TraesCS7A02G245400/TraesCS7A02G232600/TraesCS6D02G302200/TraesCS7A02G251900/TraesCS4A02G372200/TraesCS7D02G069700/TraesCS6D02G208400/TraesCS7A02G074600/TraesCS1B02G252400/TraesCS1B02G266900/TraesCS1B02G258100/TraesCS1B02G265200/TraesCS1A02G308300/TraesCS6B02G468200/TraesCS5B02G157800/TraesCS6B02G447600/TraesCS6B02G419000/TraesCS5B02G153900/TraesCS6B02G341400/TraesCS6B02G350800/TraesCS6B02G353100/…	25	BP
GO:0006448	regulation of translational elongation	5/3745	43/107890	0.0161852	0.24817	0.232902	TraesCS6D02G371300/TraesCS6B02G456000/TraesCS6B02G415800/TraesCS6B02G425800/TraesCS6B02G411200	5	BP
GO:0051574	positive regulation of histone H3-K9 methylation	3/3745	16/107890	0.016676	0.24817	0.232902	TraesCS4A02G372200/TraesCS7D02G069700/TraesCS7A02G074600	3	BP
GO:0060992	response to fungicide	3/3745	16/107890	0.016676	0.24817	0.232902	TraesCS6D02G211900/TraesCS6D02G360800/TraesCS6B02G413500	3	BP
GO:0070542	response to fatty acid	3/3745	16/107890	0.016676	0.24817	0.232902	TraesCS6D02G305200/TraesCS6B02G355700/TraesCS6B02G355900	3	BP
GO:0097468	programmed cell death in response to reactive oxygen species	3/3745	16/107890	0.016676	0.24817	0.232902	TraesCS6D02G187200/TraesCS6D02G211700/TraesCS6B02G224100	3	BP
GO:1900426	positive regulation of defense response to bacterium	3/3745	16/107890	0.016676	0.24817	0.232902	TraesCS6D02G179200/TraesCS2A02G292600/TraesCS2D02G290400	3	BP
GO:0006598	polyamine catabolic process	14/3745	212/107890	0.0167948	0.24817	0.232902	TraesCS6D02G260500/TraesCS6B02G258400/TraesCS6A02G222900/TraesCS6A02G222800/TraesCS6B02G258500/TraesCS2D02G204400/TraesCS2A02G380800/TraesCS2D02G377200/TraesCS2B02G398000/TraesCS3B02G612000/TraesCS2B02G398400/TraesCS1B02G456200/TraesCS2B02G398200/TraesCS2B02G224300	14	BP
GO:0010311	lateral root formation	14/3745	212/107890	0.0167948	0.24817	0.232902	TraesCS6D02G185800/TraesCS6D02G294600/TraesCS6D02G216400/TraesCS6D02G390100/TraesCS6D02G335000/TraesCS1B02G275600/TraesCS6B02G227700/TraesCS6B02G399500/TraesCS6B02G385200/TraesCS6B02G226200/TraesCS6B02G451200/TraesCS6B02G345800/TraesCS4A02G067300/TraesCS4D02G225200	14	BP
GO:0007091	metaphase/anaphase transition of mitotic cell cycle	10/3745	132/107890	0.0170924	0.24817	0.232902	TraesCS6D02G191700/TraesCS6D02G233200/TraesCS6D02G327000/TraesCS6D02G354500/TraesCS7A02G155100/TraesCS4B02G308700/TraesCS6A02G309600/TraesCS6B02G236700/TraesCS6B02G377000/TraesCS6B02G407600	10	BP
GO:0010965	regulation of mitotic sister chromatid separation	10/3745	132/107890	0.0170924	0.24817	0.232902	TraesCS6D02G191700/TraesCS6D02G233200/TraesCS6D02G327000/TraesCS6D02G354500/TraesCS7A02G155100/TraesCS4B02G308700/TraesCS6A02G309600/TraesCS6B02G236700/TraesCS6B02G377000/TraesCS6B02G407600	10	BP
GO:0044784	metaphase/anaphase transition of cell cycle	10/3745	132/107890	0.0170924	0.24817	0.232902	TraesCS6D02G191700/TraesCS6D02G233200/TraesCS6D02G327000/TraesCS6D02G354500/TraesCS7A02G155100/TraesCS4B02G308700/TraesCS6A02G309600/TraesCS6B02G236700/TraesCS6B02G377000/TraesCS6B02G407600	10	BP
GO:0051306	mitotic sister chromatid separation	10/3745	132/107890	0.0170924	0.24817	0.232902	TraesCS6D02G191700/TraesCS6D02G233200/TraesCS6D02G327000/TraesCS6D02G354500/TraesCS7A02G155100/TraesCS4B02G308700/TraesCS6A02G309600/TraesCS6B02G236700/TraesCS6B02G377000/TraesCS6B02G407600	10	BP
GO:0080022	primary root development	10/3745	132/107890	0.0170924	0.24817	0.232902	TraesCS6D02G294600/TraesCS2A02G116100/TraesCS6D02G391200/TraesCS7D02G419900/TraesCS7A02G427600/TraesCS7B02G327700/TraesCS5B02G158800/TraesCS6B02G345800/TraesCS6B02G452500/TraesCS6B02G452700	10	BP
GO:1905818	regulation of chromosome separation	10/3745	132/107890	0.0170924	0.24817	0.232902	TraesCS6D02G191700/TraesCS6D02G233200/TraesCS6D02G327000/TraesCS6D02G354500/TraesCS7A02G155100/TraesCS4B02G308700/TraesCS6A02G309600/TraesCS6B02G236700/TraesCS6B02G377000/TraesCS6B02G407600	10	BP
GO:0051348	negative regulation of transferase activity	21/3745	367/107890	0.0186308	0.267341	0.250894	TraesCS6D02G336200/TraesCS6D02G263500/TraesCS6D02G301100/TraesCS6D02G190300/TraesCS6A02G037000/TraesCS6D02G391200/TraesCSU02G125400/TraesCS5A02G552500/TraesCS1B02G243500/TraesCS4B02G388100/TraesCS7B02G027500/TraesCS3B02G573800/TraesCS3D02G513300/TraesCS6B02G352100/TraesCS6B02G345300/TraesCS5B02G159300/TraesCS6B02G386600/TraesCS6B02G452500/TraesCS6B02G452700/TraesCS6B02G225400/TraesCS5D02G247100	21	BP
GO:0010582	floral meristem determinacy	7/3745	78/107890	0.0187194	0.267341	0.250894	TraesCS6D02G293100/TraesCS6D02G293200/TraesCS2B02G300500/TraesCS2D02G442200/TraesCS7D02G176700/TraesCS6B02G343800/TraesCS6B02G343900	7	BP
GO:0044273	sulfur compound catabolic process	15/3745	237/107890	0.0193229	0.267341	0.250894	TraesCS6D02G183200/TraesCS6D02G260700/TraesCS6D02G192900/TraesCS7A02G227200/TraesCS7A02G219100/TraesCS7A02G256900/TraesCS2B02G244600/TraesCS6B02G440200/TraesCS6B02G235000/TraesCS6B02G354300/TraesCS6B02G337600/TraesCS6B02G238500/TraesCS5B02G155400/TraesCS5B02G155600/TraesCS7B02G271600	15	BP
GO:0080113	regulation of seed growth	4/3745	30/107890	0.0193362	0.267341	0.250894	TraesCS6D02G285300/TraesCS4B02G288000/TraesCS6B02G334600/TraesCS6B02G418600	4	BP
GO:0048354	mucilage biosynthetic process involved in seed coat development	5/3745	45/107890	0.0194148	0.267341	0.250894	TraesCS1A02G033200/TraesCS4D02G112900/TraesCS4B02G115200/TraesCS1D02G034600/TraesCS2A02G132600	5	BP
GO:0007050	cell cycle arrest	18/3745	302/107890	0.0194352	0.267341	0.250894	TraesCS6D02G195300/TraesCS6D02G315400/TraesCS6D02G305800/TraesCS6D02G301100/TraesCS7A02G214200/TraesCS6D02G302200/TraesCS7A02G213600/TraesCS6D02G233200/TraesCS6D02G192000/TraesCS6D02G327000/TraesCS6B02G352100/TraesCS6B02G366400/TraesCS6B02G334400/TraesCS5B02G159300/TraesCS6B02G356400/TraesCS6B02G353100/TraesCS7B02G115400/TraesCS5D02G247100	18	BP
GO:0006809	nitric oxide biosynthetic process	3/3745	17/107890	0.0197352	0.267341	0.250894	TraesCS6D02G020700/TraesCS6B02G356800/TraesCS6A02G326200	3	BP
GO:0017182	peptidyl-diphthamide metabolic process	3/3745	17/107890	0.0197352	0.267341	0.250894	TraesCS6D02G371300/TraesCS6B02G415800/TraesCS6B02G425800	3	BP
GO:0017183	peptidyl-diphthamide biosynthetic process from peptidyl-histidine	3/3745	17/107890	0.0197352	0.267341	0.250894	TraesCS6D02G371300/TraesCS6B02G415800/TraesCS6B02G425800	3	BP
GO:0050779	RNA destabilization	3/3745	17/107890	0.0197352	0.267341	0.250894	TraesCS7B02G114200/TraesCS3A02G232500/TraesCS3D02G220700	3	BP
GO:0061157	mRNA destabilization	3/3745	17/107890	0.0197352	0.267341	0.250894	TraesCS7B02G114200/TraesCS3A02G232500/TraesCS3D02G220700	3	BP
GO:0071452	cellular response to singlet oxygen	3/3745	17/107890	0.0197352	0.267341	0.250894	TraesCS6D02G187200/TraesCS6D02G211700/TraesCS6B02G224100	3	BP
GO:1900247	regulation of cytoplasmic translational elongation	3/3745	17/107890	0.0197352	0.267341	0.250894	TraesCS6D02G371300/TraesCS6B02G415800/TraesCS6B02G425800	3	BP
GO:0040034	regulation of development, heterochronic	11/3745	156/107890	0.0207184	0.279221	0.262042	TraesCS6D02G293200/TraesCS1A02G199900/TraesCS3A02G432900/TraesCS3D02G427900/TraesCS3A02G434900/TraesCS7D02G261900/TraesCS4B02G288000/TraesCS3D02G428000/TraesCS7D02G176700/TraesCS6B02G343900/TraesCS4A02G409200	11	BP
GO:0043666	regulation of phosphoprotein phosphatase activity	5/3745	46/107890	0.021177	0.282482	0.265103	TraesCS7B02G278100/TraesCS3A02G210300/TraesCS7D02G364600/TraesCS7A02G358200/TraesCS7B02G269600	5	BP
GO:0042273	ribosomal large subunit biogenesis	17/3745	283/107890	0.0211813	0.282482	0.265103	TraesCS7A02G278700/TraesCS6D02G246600/TraesCS7A02G266000/TraesCS6D02G269300/TraesCS7A02G261600/TraesCS4B02G108400/TraesCS6D02G214200/TraesCS6D02G190000/TraesCS3B02G487900/TraesCS1B02G245100/TraesCS1B02G254000/TraesCS5B02G152500/TraesCS6B02G376800/TraesCS6B02G225700/TraesCS6B02G225600/TraesCS6B02G239800/TraesCS4A02G158000	17	BP
GO:0000422	autophagy of mitochondrion	4/3745	31/107890	0.0216054	0.282482	0.265103	TraesCS7A02G208300/TraesCS7B02G070300/TraesCS6B02G366600/TraesCS6B02G386200	4	BP
GO:0031057	negative regulation of histone modification	4/3745	31/107890	0.0216054	0.282482	0.265103	TraesCS6D02G196000/TraesCS4A02G372200/TraesCS7D02G069700/TraesCS7A02G074600	4	BP
GO:0061726	mitochondrion disassembly	4/3745	31/107890	0.0216054	0.282482	0.265103	TraesCS7A02G208300/TraesCS7B02G070300/TraesCS6B02G366600/TraesCS6B02G386200	4	BP
GO:0080112	seed growth	4/3745	31/107890	0.0216054	0.282482	0.265103	TraesCS6D02G285300/TraesCS4B02G288000/TraesCS6B02G334600/TraesCS6B02G418600	4	BP
GO:0006354	DNA-templated transcription, elongation	23/3745	419/107890	0.022088	0.287363	0.269684	TraesCS6D02G288500/TraesCS6D02G288400/TraesCS6D02G304800/TraesCS6D02G311700/TraesCS6D02G286900/TraesCS6D02G215900/TraesCS1B02G259300/TraesCS1B02G254000/TraesCS7A02G114000/TraesCS7D02G109300/TraesCS4D02G145700/TraesCS6B02G338100/TraesCS4B02G116000/TraesCS6B02G338200/TraesCS6B02G336300/TraesCS6B02G350800/TraesCS6B02G349300/TraesCS5B02G157500/TraesCS4B02G115800/TraesCS6B02G355400/TraesCS6B02G331800/…	23	BP
GO:0051983	regulation of chromosome segregation	11/3745	158/107890	0.0225181	0.290182	0.272329	TraesCS6D02G191700/TraesCS6D02G233200/TraesCS6D02G327000/TraesCS6D02G354500/TraesCS7A02G155100/TraesCS4B02G308700/TraesCS6A02G309600/TraesCS6B02G356900/TraesCS6B02G236700/TraesCS6B02G377000/TraesCS6B02G407600	11	BP
GO:0030182	neuron differentiation	25/3745	466/107890	0.0225821	0.290182	0.272329	TraesCS6D02G270300/TraesCS7A02G227400/TraesCS6D02G242400/TraesCS7A02G257800/TraesCS1D02G406300/TraesCS7A02G272700/TraesCS7A02G262700/TraesCS3B02G146300/TraesCS7B02G173000/TraesCS1B02G277400/TraesCS7A02G465800/TraesCS2D02G480300/TraesCS5B02G047900/TraesCS1B02G266200/TraesCS5B02G159100/TraesCS6B02G377200/TraesCS6B02G335200/TraesCS7A02G419900/TraesCS6B02G396100/TraesCS3D02G165500/TraesCSU02G088100/T…	25	BP
GO:0009809	lignin biosynthetic process	24/3745	443/107890	0.022636	0.290182	0.272329	TraesCS6D02G388700/TraesCS5D02G276300/TraesCS7B02G298300/TraesCS3B02G034800/TraesCS7D02G341500/TraesCS7D02G239200/TraesCS3A02G534900/TraesCS3D02G540200/TraesCS7B02G135900/TraesCS6B02G449400/TraesCS5B02G155400/TraesCS1D02G082800/TraesCS3B02G612000/TraesCS1D02G176400/TraesCS5B02G155600/TraesCS7A02G068000/TraesCS7D02G062100/TraesCS6B02G406000/TraesCS1B02G098800/TraesCS1A02G177800/TraesCS7B02G271600/…	24	BP
GO:0031058	positive regulation of histone modification	5/3745	47/107890	0.0230401	0.292509	0.274513	TraesCS4A02G372200/TraesCS7D02G069700/TraesCS7A02G074600/TraesCS4D02G145700/TraesCS6B02G350800	5	BP
GO:1903008	organelle disassembly	5/3745	47/107890	0.0230401	0.292509	0.274513	TraesCS7A02G208300/TraesCS7B02G070300/TraesCS6B02G388100/TraesCS6B02G366600/TraesCS6B02G386200	5	BP
GO:0048581	negative regulation of post-embryonic development	22/3745	399/107890	0.0236817	0.29921	0.280801	TraesCS7A02G218600/TraesCS6D02G305800/TraesCS6D02G293200/TraesCS6D02G216400/TraesCS6B02G113100/TraesCS7A02G263500/TraesCS6A02G216400/TraesCS6D02G267100/TraesCS3D02G385400/TraesCS1B02G275600/TraesCS7D02G176700/TraesCS4D02G145700/TraesCS3D02G163900/TraesCS6A02G309600/TraesCS6B02G367800/TraesCS6B02G350800/TraesCS5B02G153300/TraesCS6B02G356400/TraesCS6B02G343900/TraesCS3D02G161800/TraesCS3A02G210100/…	22	BP
GO:0009423	chorismate biosynthetic process	4/3745	32/107890	0.0240305	0.302164	0.283574	TraesCS2A02G523400/TraesCS2D02G525500/TraesCS6B02G333600/TraesCS2B02G553300	4	BP
GO:0033047	regulation of mitotic sister chromatid segregation	10/3745	141/107890	0.0256985	0.321598	0.301812	TraesCS6D02G191700/TraesCS6D02G233200/TraesCS6D02G327000/TraesCS6D02G354500/TraesCS7A02G155100/TraesCS4B02G308700/TraesCS6A02G309600/TraesCS6B02G236700/TraesCS6B02G377000/TraesCS6B02G407600	10	BP
GO:0000722	telomere maintenance via recombination	4/3745	33/107890	0.0266137	0.323556	0.303649	TraesCS6D02G315400/TraesCS6D02G302200/TraesCS6B02G366400/TraesCS6B02G353100	4	BP
GO:0006368	transcription elongation from RNA polymerase II promoter	13/3745	204/107890	0.0266944	0.323556	0.303649	TraesCS6D02G288500/TraesCS6D02G288400/TraesCS6D02G304800/TraesCS6D02G215900/TraesCS7A02G114000/TraesCS7D02G109300/TraesCS4D02G145700/TraesCS6B02G338100/TraesCS4B02G116000/TraesCS6B02G338200/TraesCS6B02G350800/TraesCS4B02G115800/TraesCS6B02G355400	13	BP
GO:0032350	regulation of hormone metabolic process	13/3745	204/107890	0.0266944	0.323556	0.303649	TraesCS6D02G358000/TraesCS6D02G179200/TraesCS6D02G241900/TraesCS6D02G335000/TraesCS6D02G251700/TraesCS6B02G234200/TraesCS6B02G385200/TraesCS6B02G226200/TraesCS5B02G153300/TraesCS4B02G120800/TraesCS6B02G411500/TraesCS6D02G080500/TraesCS6A02G091700	13	BP
GO:0045763	negative regulation of cellular amino acid metabolic process	3/3745	19/107890	0.0267167	0.323556	0.303649	TraesCS6D02G335000/TraesCS6B02G385200/TraesCS6B02G226200	3	BP
GO:0051175	negative regulation of sulfur metabolic process	3/3745	19/107890	0.0267167	0.323556	0.303649	TraesCS6D02G335000/TraesCS6B02G385200/TraesCS6B02G226200	3	BP
GO:0071480	cellular response to gamma radiation	3/3745	19/107890	0.0267167	0.323556	0.303649	TraesCS6D02G301000/TraesCS6B02G352000/TraesCS6B02G351800	3	BP
GO:0080009	mRNA methylation	3/3745	19/107890	0.0267167	0.323556	0.303649	TraesCS6D02G236200/TraesCS7A02G234600/TraesCS6D02G274200	3	BP
GO:0031056	regulation of histone modification	7/3745	85/107890	0.0284679	0.343182	0.322068	TraesCS6D02G196000/TraesCS4A02G372200/TraesCS7D02G069700/TraesCS7A02G074600/TraesCS4D02G145700/TraesCS6B02G350800/TraesCS7B02G175400	7	BP
GO:0010076	maintenance of floral meristem identity	6/3745	67/107890	0.028743	0.344915	0.323695	TraesCS7A02G260600/TraesCS6D02G293200/TraesCS3A02G434900/TraesCS2B02G300500/TraesCS7D02G176700/TraesCS6B02G343900	6	BP
GO:0031048	heterochromatin assembly by small RNA	19/3745	339/107890	0.0291428	0.345148	0.323913	TraesCS7A02G245400/TraesCS6D02G302200/TraesCS4A02G372200/TraesCS7D02G069700/TraesCS6D02G208400/TraesCS7A02G074600/TraesCS1B02G252400/TraesCS1B02G266900/TraesCS1B02G258100/TraesCS1A02G308300/TraesCS6B02G468200/TraesCS6B02G447600/TraesCS6B02G419000/TraesCS5B02G153900/TraesCS6B02G341400/TraesCS6B02G350800/TraesCS6B02G356900/TraesCS6B02G353100/TraesCS6B02G393100	19	BP
GO:0006801	superoxide metabolic process	10/3745	144/107890	0.0291563	0.345148	0.323913	TraesCS6D02G320800/TraesCS6D02G198100/TraesCS6D02G258600/TraesCS7A02G225400/TraesCS6B02G189800/TraesCS5B02G213900/TraesCS6B02G371500/TraesCS6B02G344900/TraesCS6B02G237400/TraesCS6B02G240200	10	BP
GO:0008340	determination of adult lifespan	10/3745	144/107890	0.0291563	0.345148	0.323913	TraesCS6D02G187100/TraesCS4D02G238200/TraesCS6D02G192000/TraesCS6D02G198800/TraesCS4B02G236700/TraesCS1B02G252100/TraesCS6B02G224000/TraesCS7B02G114200/TraesCS6B02G239500/TraesCS7B02G417700	10	BP
GO:0051783	regulation of nuclear division	15/3745	250/107890	0.0293027	0.345325	0.32408	TraesCS6D02G191700/TraesCS7A02G248700/TraesCS6D02G233200/TraesCS6D02G190300/TraesCS6D02G327000/TraesCS6D02G354500/TraesCS7A02G155100/TraesCS1B02G254400/TraesCS4B02G308700/TraesCS6A02G309600/TraesCS6B02G236700/TraesCS6B02G225400/TraesCS6B02G377000/TraesCS7B02G115400/TraesCS6B02G407600	15	BP
GO:0000027	ribosomal large subunit assembly	8/3745	105/107890	0.0300672	0.352752	0.33105	TraesCS6D02G246600/TraesCS4B02G108400/TraesCS6D02G190000/TraesCS5B02G152500/TraesCS6B02G225700/TraesCS6B02G225600/TraesCS6B02G239800/TraesCS4A02G158000	8	BP
GO:0009081	branched-chain amino acid metabolic process	10/3745	145/107890	0.0303788	0.354699	0.332877	TraesCS6D02G201500/TraesCS7A02G280700/TraesCS6D02G393200/TraesCS6D02G225800/TraesCS3B02G119800/TraesCS7A02G419900/TraesCS3D02G167700/TraesCS3A02G205100/TraesCS6B02G455600/TraesCS5B02G154500	10	BP
GO:0042276	error-prone translesion synthesis	3/3745	20/107890	0.030638	0.354699	0.332877	TraesCS6D02G357600/TraesCS3B02G289300/TraesCS6B02G411100	3	BP
GO:0061014	positive regulation of mRNA catabolic process	3/3745	20/107890	0.030638	0.354699	0.332877	TraesCS7B02G114200/TraesCS3A02G232500/TraesCS3D02G220700	3	BP
GO:0070574	cadmium ion transmembrane transport	5/3745	51/107890	0.0315352	0.36229	0.340001	TraesCS5B02G155400/TraesCS7A02G419500/TraesCS7A02G420000/TraesCS5B02G155600/TraesCS7B02G271600	5	BP
GO:0006606	protein import into nucleus	21/3745	388/107890	0.0315694	0.36229	0.340001	TraesCS7A02G262400/TraesCS6D02G331000/TraesCS5B02G051300/TraesCS6D02G341300/TraesCS6D02G288900/TraesCS3B02G517500/TraesCS1B02G266900/TraesCS1B02G270700/TraesCS1B02G248000/TraesCS4A02G039700/TraesCSU02G140000/TraesCS6A02G177000/TraesCS6B02G339400/TraesCS6B02G373300/TraesCS6B02G456000/TraesCS6A02G309600/TraesCS6B02G337900/TraesCS6B02G391200/TraesCS6B02G381600/TraesCS6A02G190000/TraesCS6B02G339300	21	BP
GO:0006767	water-soluble vitamin metabolic process	22/3745	413/107890	0.0329289	0.374648	0.351598	TraesCS7A02G286300/TraesCS7A02G276800/TraesCS7A02G276900/TraesCS6D02G370600/TraesCS6D02G378500/TraesCS6D02G388700/TraesCS7A02G232400/TraesCS1B02G245400/TraesCS1B02G253900/TraesCS1B02G255100/TraesCS7A02G234200/TraesCS1B02G266500/TraesCS2A02G439900/TraesCS6B02G333700/TraesCS6B02G230600/TraesCS6B02G402400/TraesCS4D02G145000/TraesCS3D02G167700/TraesCS7A02G415600/TraesCS6B02G433000/TraesCS1A02G416700/…	22	BP
GO:0010259	multicellular organism aging	10/3745	147/107890	0.0329314	0.374648	0.351598	TraesCS6D02G187100/TraesCS4D02G238200/TraesCS6D02G192000/TraesCS6D02G198800/TraesCS4B02G236700/TraesCS1B02G252100/TraesCS6B02G224000/TraesCS7B02G114200/TraesCS6B02G239500/TraesCS7B02G417700	10	BP
GO:0071941	nitrogen cycle metabolic process	16/3745	278/107890	0.034738	0.391324	0.367248	TraesCS7A02G259700/TraesCS6D02G260500/TraesCS1B02G267900/TraesCS6D02G020700/TraesCS1B02G257300/TraesCS6A02G298100/TraesCS3A02G206600/TraesCS7B02G113600/TraesCS5B02G153300/TraesCS3D02G166900/TraesCS5B02G414000/TraesCS7B02G262200/TraesCS4D02G047400/TraesCS4A02G266900/TraesCS6B02G356800/TraesCS6A02G326200	16	BP
GO:0031204	posttranslational protein targeting to membrane, translocation	3/3745	21/107890	0.0348439	0.391324	0.367248	TraesCS7A02G244100/TraesCS3A02G207800/TraesCS4A02G066100	3	BP
GO:2000765	regulation of cytoplasmic translation	3/3745	21/107890	0.0348439	0.391324	0.367248	TraesCS6D02G371300/TraesCS6B02G415800/TraesCS6B02G425800	3	BP
GO:0032106	positive regulation of response to extracellular stimulus	4/3745	36/107890	0.035327	0.393387	0.369184	TraesCS2A02G169600/TraesCS7B02G478000/TraesCS6B02G403400/TraesCS3A02G205600	4	BP
GO:0032109	positive regulation of response to nutrient levels	4/3745	36/107890	0.035327	0.393387	0.369184	TraesCS2A02G169600/TraesCS7B02G478000/TraesCS6B02G403400/TraesCS3A02G205600	4	BP
GO:0051322	anaphase	16/3745	279/107890	0.035711	0.395985	0.371623	TraesCS7A02G215000/TraesCS7A02G261300/TraesCS6D02G327000/TraesCS6D02G214400/TraesCS6D02G208400/TraesCS1B02G274600/TraesCS1B02G267200/TraesCS4B02G173500/TraesCS6B02G335200/TraesCS6B02G447600/TraesCS6B02G341400/TraesCS6B02G356900/TraesCS6B02G472100/TraesCS6B02G333400/TraesCS6B02G393100/TraesCS6B02G462700	16	BP
GO:0010833	telomere maintenance via telomere lengthening	5/3745	53/107890	0.0364277	0.402235	0.377488	TraesCS6D02G315400/TraesCS6D02G302200/TraesCS7B02G121400/TraesCS6B02G366400/TraesCS6B02G353100	5	BP
GO:0051170	import into nucleus	23/3745	442/107890	0.0372233	0.407595	0.382519	TraesCS7A02G262400/TraesCS6D02G331000/TraesCS5B02G051300/TraesCS7A02G264000/TraesCS6D02G341300/TraesCS6D02G395000/TraesCS6D02G288900/TraesCS3B02G517500/TraesCS1B02G266900/TraesCS1B02G270700/TraesCS1B02G248000/TraesCS4A02G039700/TraesCSU02G140000/TraesCS6A02G177000/TraesCS6B02G339400/TraesCS6B02G373300/TraesCS6B02G456000/TraesCS6A02G309600/TraesCS6B02G337900/TraesCS6B02G391200/TraesCS6B02G381600/T…	23	BP
GO:1901990	regulation of mitotic cell cycle phase transition	23/3745	442/107890	0.0372233	0.407595	0.382519	TraesCS6D02G195300/TraesCS6D02G191700/TraesCS6D02G305800/TraesCS7A02G248700/TraesCS6D02G233200/TraesCS6D02G327000/TraesCS6D02G214400/TraesCS6D02G354500/TraesCS7A02G155100/TraesCS4B02G308700/TraesCS6B02G344300/TraesCS6A02G309600/TraesCS5B02G156900/TraesCS6B02G341400/TraesCS6B02G356900/TraesCS6B02G356400/TraesCS6B02G236700/TraesCS7B02G216700/TraesCS7D02G312700/TraesCS6B02G393100/TraesCS6B02G377000/…	23	BP
GO:0071826	ribonucleoprotein complex subunit organization	24/3745	467/107890	0.0383043	0.417691	0.391994	TraesCS6D02G294500/TraesCS6D02G246600/TraesCS6D02G331000/TraesCS6D02G197000/TraesCS6D02G188600/TraesCS6D02G207800/TraesCS4B02G108400/TraesCS6D02G182200/TraesCS6D02G190000/TraesCS6D02G266800/TraesCS7D02G069200/TraesCS6B02G083500/TraesCS5B02G152500/TraesCS6B02G225700/TraesCS6B02G225600/TraesCS6B02G239800/TraesCS6B02G231100/TraesCS6B02G381600/TraesCS6B02G230500/TraesCS3D02G161300/TraesCS4A02G158000/…	24	BP
GO:1905269	positive regulation of chromatin organization	5/3745	54/107890	0.039039	0.421757	0.395809	TraesCS4A02G372200/TraesCS7D02G069700/TraesCS7A02G074600/TraesCS4D02G145700/TraesCS6B02G350800	5	BP
GO:0006620	posttranslational protein targeting to endoplasmic reticulum membrane	3/3745	22/107890	0.0393312	0.421757	0.395809	TraesCS7A02G244100/TraesCS3A02G207800/TraesCS4A02G066100	3	BP
GO:0009399	nitrogen fixation	3/3745	22/107890	0.0393312	0.421757	0.395809	TraesCS6A02G298100/TraesCS4D02G047400/TraesCS4A02G266900	3	BP
GO:0051570	regulation of histone H3-K9 methylation	3/3745	22/107890	0.0393312	0.421757	0.395809	TraesCS4A02G372200/TraesCS7D02G069700/TraesCS7A02G074600	3	BP
GO:0016119	carotene metabolic process	9/3745	131/107890	0.0394835	0.421757	0.395809	TraesCS6D02G251800/TraesCS6D02G206800/TraesCS1B02G273500/TraesCS6B02G427200/TraesCS1A02G145300/TraesCS3A02G208800/TraesCS5B02G164400/TraesCS5A02G167400/TraesCS1B02G162500	9	BP
GO:1901987	regulation of cell cycle phase transition	23/3745	445/107890	0.0396578	0.421757	0.395809	TraesCS6D02G195300/TraesCS6D02G191700/TraesCS6D02G305800/TraesCS7A02G248700/TraesCS6D02G233200/TraesCS6D02G327000/TraesCS6D02G214400/TraesCS6D02G354500/TraesCS7A02G155100/TraesCS4B02G308700/TraesCS6B02G344300/TraesCS6A02G309600/TraesCS5B02G156900/TraesCS6B02G341400/TraesCS6B02G356900/TraesCS6B02G356400/TraesCS6B02G236700/TraesCS7B02G216700/TraesCS7D02G312700/TraesCS6B02G393100/TraesCS6B02G377000/…	23	BP
GO:0072503	cellular divalent inorganic cation homeostasis	11/3745	173/107890	0.039808	0.421757	0.395809	TraesCS6D02G204000/TraesCS6D02G187200/TraesCS6D02G211700/TraesCS6B02G344100/TraesCS4A02G405400/TraesCS2D02G356300/TraesCS6B02G250200/TraesCS6B02G224100/TraesCS6B02G382300/TraesCS6B02G396200/TraesCS6B02G382500	11	BP
GO:0032204	regulation of telomere maintenance	10/3745	152/107890	0.039961	0.421757	0.395809	TraesCS6D02G378100/TraesCS6D02G315400/TraesCS6D02G196000/TraesCS1B02G328200/TraesCS6B02G333700/TraesCS6B02G366400/TraesCS6B02G356900/TraesCS6B02G399000/TraesCS6B02G351900/TraesCS6B02G432500	10	BP
GO:0030433	ubiquitin-dependent ERAD pathway	9/3745	132/107890	0.0411219	0.427075	0.4008	TraesCS7A02G220000/TraesCS6D02G187100/TraesCS7A02G274800/TraesCS1D02G330800/TraesCS5B02G054600/TraesCS6B02G376500/TraesCS6B02G341600/TraesCS6B02G339600/TraesCS4A02G066100	9	BP
GO:0016145	S-glycoside catabolic process	5/3745	55/107890	0.0417615	0.427075	0.4008	TraesCS6D02G260700/TraesCS7A02G227200/TraesCS5B02G155400/TraesCS5B02G155600/TraesCS7B02G271600	5	BP
GO:0019759	glycosinolate catabolic process	5/3745	55/107890	0.0417615	0.427075	0.4008	TraesCS6D02G260700/TraesCS7A02G227200/TraesCS5B02G155400/TraesCS5B02G155600/TraesCS7B02G271600	5	BP
GO:0019762	glucosinolate catabolic process	5/3745	55/107890	0.0417615	0.427075	0.4008	TraesCS6D02G260700/TraesCS7A02G227200/TraesCS5B02G155400/TraesCS5B02G155600/TraesCS7B02G271600	5	BP
GO:0046487	glyoxylate metabolic process	5/3745	55/107890	0.0417615	0.427075	0.4008	TraesCS7A02G219100/TraesCS6A02G334000/TraesCS2B02G244600/TraesCS6B02G440200/TraesCS6B02G364700	5	BP
GO:0015850	organic hydroxy compound transport	12/3745	196/107890	0.0418647	0.427075	0.4008	TraesCS2D02G408700/TraesCS3A02G218000/TraesCS3B02G248500/TraesCS3D02G234300/TraesCS6B02G456500/TraesCS5B02G155400/TraesCS7B02G292700/TraesCS2B02G430000/TraesCS5B02G155600/TraesCS7B02G262200/TraesCS7D02G386600/TraesCS7B02G271600	12	BP
GO:0006359	regulation of transcription by RNA polymerase III	4/3745	38/107890	0.0419478	0.427075	0.4008	TraesCS6D02G213900/TraesCS6D02G309500/TraesCS4D02G136700/TraesCS6B02G361300	4	BP
GO:0010411	xyloglucan metabolic process	18/3745	331/107890	0.0422445	0.427075	0.4008	TraesCS6D02G181200/TraesCS7A02G210600/TraesCS6D02G300400/TraesCS5D02G092500/TraesCS7D02G419900/TraesCS3B02G108700/TraesCS6B02G454200/TraesCS7A02G427600/TraesCS1D02G404300/TraesCS7B02G327700/TraesCS7A02G063300/TraesCS3D02G093900/TraesCS7A02G191700/TraesCS7B02G096600/TraesCS5A02G548500/TraesCS6B02G350900/TraesCS7A02G427100/TraesCS7D02G192700	18	BP
GO:0042752	regulation of circadian rhythm	11/3745	175/107890	0.042661	0.427075	0.4008	TraesCS6D02G294500/TraesCS6D02G294600/TraesCS7A02G284800/TraesCS6D02G305800/TraesCS6D02G239800/TraesCS5D02G475400/TraesCS6A02G177000/TraesCS7B02G384000/TraesCS6B02G356400/TraesCS6B02G462100/TraesCS6B02G345800	11	BP
GO:0031145	anaphase-promoting complex-dependent catabolic process	9/3745	133/107890	0.0428055	0.427075	0.4008	TraesCS6D02G195300/TraesCS6D02G233200/TraesCS6D02G327000/TraesCS6D02G354500/TraesCS7A02G155100/TraesCS7A02G275500/TraesCS6B02G335200/TraesCS6B02G377000/TraesCS6B02G407600	9	BP
GO:0000288	nuclear-transcribed mRNA catabolic process, deadenylation-dependent decay	12/3745	197/107890	0.043232	0.427075	0.4008	TraesCS6D02G213600/TraesCS6D02G266800/TraesCS6B02G083500/TraesCS1B02G254400/TraesCS2A02G528800/TraesCS1B02G254600/TraesCS6D02G318000/TraesCS5B02G159400/TraesCS4B02G117300/TraesCS6B02G412000/TraesCS6B02G391400/TraesCS7B02G114200	12	BP
GO:0006542	glutamine biosynthetic process	3/3745	23/107890	0.044096	0.427075	0.4008	TraesCS6A02G298100/TraesCS4D02G047400/TraesCS4A02G266900	3	BP
GO:1901141	regulation of lignin biosynthetic process	3/3745	23/107890	0.044096	0.427075	0.4008	TraesCS5B02G155400/TraesCS5B02G155600/TraesCS7B02G271600	3	BP
GO:2000379	positive regulation of reactive oxygen species metabolic process	3/3745	23/107890	0.044096	0.427075	0.4008	TraesCS6D02G320800/TraesCS1B02G265300/TraesCS6B02G371500	3	BP
GO:0033260	nuclear DNA replication	5/3745	56/107890	0.0445956	0.427075	0.4008	TraesCS6D02G315400/TraesCS6D02G302200/TraesCS7A02G213600/TraesCS6B02G366400/TraesCS6B02G353100	5	BP
GO:0050767	regulation of neurogenesis	5/3745	56/107890	0.0445956	0.427075	0.4008	TraesCS6D02G294500/TraesCS7A02G228200/TraesCS7A02G227400/TraesCS6D02G242400/TraesCS6B02G345700	5	BP
GO:2001251	negative regulation of chromosome organization	10/3745	155/107890	0.0446394	0.427075	0.4008	TraesCS6D02G191700/TraesCS6D02G233200/TraesCS6D02G196000/TraesCS6D02G327000/TraesCS4A02G372200/TraesCS7D02G069700/TraesCS7A02G074600/TraesCS4B02G308700/TraesCS6A02G309600/TraesCS6B02G236700	10	BP
GO:0015794	glycerol-3-phosphate transmembrane transport	2/3745	10/107890	0.0450399	0.427075	0.4008	TraesCS2D02G408700/TraesCS2B02G430000	2	BP
GO:0017198	N-terminal peptidyl-serine acetylation	2/3745	10/107890	0.0450399	0.427075	0.4008	TraesCS2A02G528900/TraesCS6B02G412200	2	BP
GO:0018002	N-terminal peptidyl-glutamic acid acetylation	2/3745	10/107890	0.0450399	0.427075	0.4008	TraesCS2A02G528900/TraesCS6B02G412200	2	BP
GO:0030920	peptidyl-serine acetylation	2/3745	10/107890	0.0450399	0.427075	0.4008	TraesCS2A02G528900/TraesCS6B02G412200	2	BP
GO:0032526	response to retinoic acid	2/3745	10/107890	0.0450399	0.427075	0.4008	TraesCS6D02G294500/TraesCS6B02G345700	2	BP
GO:0033002	muscle cell proliferation	2/3745	10/107890	0.0450399	0.427075	0.4008	TraesCS6D02G270300/TraesCS6B02G405200	2	BP
GO:0042051	compound eye photoreceptor development	2/3745	10/107890	0.0450399	0.427075	0.4008	TraesCS6B02G377200/TraesCS4D02G305100	2	BP
GO:0048489	synaptic vesicle transport	2/3745	10/107890	0.0450399	0.427075	0.4008	TraesCS6D02G254300/TraesCS1B02G252100	2	BP
GO:0050732	negative regulation of peptidyl-tyrosine phosphorylation	2/3745	10/107890	0.0450399	0.427075	0.4008	TraesCS6D02G336200/TraesCS6B02G386600	2	BP
GO:0080142	regulation of salicylic acid biosynthetic process	2/3745	10/107890	0.0450399	0.427075	0.4008	TraesCS6D02G080500/TraesCS6A02G091700	2	BP
GO:0097479	synaptic vesicle localization	2/3745	10/107890	0.0450399	0.427075	0.4008	TraesCS6D02G254300/TraesCS1B02G252100	2	BP
GO:0034504	protein localization to nucleus	21/3745	404/107890	0.045251	0.427075	0.4008	TraesCS7A02G262400/TraesCS6D02G331000/TraesCS5B02G051300/TraesCS6D02G341300/TraesCS6D02G288900/TraesCS3B02G517500/TraesCS1B02G266900/TraesCS1B02G270700/TraesCS1B02G248000/TraesCS4A02G039700/TraesCSU02G140000/TraesCS6A02G177000/TraesCS6B02G339400/TraesCS6B02G373300/TraesCS6B02G456000/TraesCS6A02G309600/TraesCS6B02G337900/TraesCS6B02G391200/TraesCS6B02G381600/TraesCS6A02G190000/TraesCS6B02G339300	21	BP
GO:0051204	protein insertion into mitochondrial membrane	4/3745	39/107890	0.0455027	0.427075	0.4008	TraesCS7A02G282000/TraesCS6D02G240500/TraesCS7A02G262900/TraesCS1B02G199200	4	BP
GO:0090151	establishment of protein localization to mitochondrial membrane	4/3745	39/107890	0.0455027	0.427075	0.4008	TraesCS7A02G282000/TraesCS6D02G240500/TraesCS7A02G262900/TraesCS1B02G199200	4	BP
GO:0048768	root hair cell tip growth	7/3745	95/107890	0.0475914	0.44509	0.417706	TraesCS6D02G390100/TraesCS3A02G209500/TraesCS6B02G367000/TraesCS6B02G431400/TraesCS6B02G451200/TraesCS5D02G396300/TraesCS5A02G386500	7	BP
GO:0045596	negative regulation of cell differentiation	19/3745	360/107890	0.0483318	0.450411	0.4227	TraesCS7A02G260600/TraesCS7A02G228200/TraesCS6D02G293200/TraesCS1A02G199900/TraesCS3A02G432900/TraesCS3D02G427900/TraesCS3A02G434900/TraesCS1B02G273300/TraesCS2B02G300500/TraesCS7D02G261900/TraesCS5D02G454200/TraesCS2D02G442200/TraesCS3D02G428000/TraesCS7B02G158900/TraesCS7D02G176700/TraesCS4D02G145700/TraesCS6B02G350800/TraesCS6B02G343900/TraesCS6B02G466700	19	BP
GO:0006771	riboflavin metabolic process	4/3745	40/107890	0.0492202	0.45546	0.427439	TraesCS6D02G378500/TraesCS6B02G230600/TraesCS7A02G415600/TraesCS6B02G433000	4	BP
GO:0009231	riboflavin biosynthetic process	4/3745	40/107890	0.0492202	0.45546	0.427439	TraesCS6D02G378500/TraesCS6B02G230600/TraesCS7A02G415600/TraesCS6B02G433000	4	BP
GO:0006446	regulation of translational initiation	10/3745	158/107890	0.0496751	0.458056	0.429875	TraesCS6D02G331000/TraesCS6D02G266800/TraesCS7D02G069200/TraesCS6B02G083500/TraesCS7A02G252300/TraesCS1B02G254000/TraesCS6B02G421000/TraesCS6B02G381600/TraesCS7A02G419400/TraesCS3D02G161300	10	BP
GO:0007129	homologous chromosome pairing at meiosis	16/3745	292/107890	0.0502146	0.461413	0.433025	TraesCS7A02G255400/TraesCS6D02G315400/TraesCS7A02G279000/TraesCS7A02G233700/TraesCS6D02G196000/TraesCS7A02G247500/TraesCS6D02G341400/TraesCS1B02G328200/TraesCS6D02G229100/TraesCS5A02G099700/TraesCS6B02G333700/TraesCS6B02G366400/TraesCS6B02G356900/TraesCS3D02G145600/TraesCS6B02G351900/TraesCS3D02G235200	16	BP
GO:0032196	transposition	5/3745	58/107890	0.0506006	0.463339	0.434833	TraesCS4A02G372200/TraesCS7D02G069700/TraesCS7A02G074600/TraesCS6B02G337500/TraesCS6A02G308700	5	BP
GO:0051592	response to calcium ion	6/3745	77/107890	0.0512846	0.467972	0.439181	TraesCS6D02G271900/TraesCS2D02G033200/TraesCS2B02G047400/TraesCS2A02G033700/TraesCS5D02G392200/TraesCS5A02G382800	6	BP
GO:0010332	response to gamma radiation	13/3745	225/107890	0.0516957	0.470091	0.441169	TraesCS6D02G301000/TraesCS6D02G315400/TraesCS6D02G196000/TraesCS1B02G328200/TraesCS6B02G333700/TraesCS6B02G352000/TraesCS6B02G366400/TraesCS6B02G356900/TraesCS7A02G414700/TraesCS6B02G399000/TraesCS6B02G351900/TraesCS7B02G115400/TraesCS6B02G351800	13	BP
GO:0042727	flavin-containing compound biosynthetic process	4/3745	41/107890	0.0530998	0.472129	0.443082	TraesCS6D02G378500/TraesCS6B02G230600/TraesCS7A02G415600/TraesCS6B02G433000	4	BP
GO:0044804	autophagy of nucleus	4/3745	41/107890	0.0530998	0.472129	0.443082	TraesCS7A02G208300/TraesCS7B02G070300/TraesCS6B02G366600/TraesCS6B02G386200	4	BP
GO:0022618	ribonucleoprotein complex assembly	23/3745	460/107890	0.0536143	0.472129	0.443082	TraesCS6D02G294500/TraesCS6D02G246600/TraesCS6D02G331000/TraesCS6D02G197000/TraesCS6D02G188600/TraesCS6D02G207800/TraesCS4B02G108400/TraesCS6D02G182200/TraesCS6D02G190000/TraesCS6D02G266800/TraesCS7D02G069200/TraesCS6B02G083500/TraesCS5B02G152500/TraesCS6B02G225700/TraesCS6B02G225600/TraesCS6B02G239800/TraesCS6B02G231100/TraesCS6B02G381600/TraesCS6B02G230500/TraesCS3D02G161300/TraesCS4A02G158000/…	23	BP
GO:0000050	urea cycle	2/3745	11/107890	0.0538061	0.472129	0.443082	TraesCS1B02G257300/TraesCS3A02G206600	2	BP
GO:0018200	peptidyl-glutamic acid modification	2/3745	11/107890	0.0538061	0.472129	0.443082	TraesCS2A02G528900/TraesCS6B02G412200	2	BP
GO:0051571	positive regulation of histone H3-K4 methylation	2/3745	11/107890	0.0538061	0.472129	0.443082	TraesCS4D02G145700/TraesCS6B02G350800	2	BP
GO:0051881	regulation of mitochondrial membrane potential	2/3745	11/107890	0.0538061	0.472129	0.443082	TraesCS6D02G293100/TraesCS6B02G343800	2	BP
GO:1901976	regulation of cell cycle checkpoint	2/3745	11/107890	0.0538061	0.472129	0.443082	TraesCS6D02G191700/TraesCS6B02G236700	2	BP
GO:0006825	copper ion transport	9/3745	139/107890	0.0538786	0.472129	0.443082	TraesCS7A02G261100/TraesCS5D02G218300/TraesCS5B02G210000/TraesCS5A02G213700/TraesCS6D02G338400/TraesCS7A02G419500/TraesCS7A02G420000/TraesCS2B02G429200/TraesCS6B02G388500	9	BP
GO:0006596	polyamine biosynthetic process	6/3745	78/107890	0.0539984	0.472129	0.443082	TraesCS7A02G265300/TraesCS7A02G265200/TraesCS7A02G220000/TraesCS6D02G202500/TraesCS6D02G202400/TraesCS1D02G012300	6	BP
GO:2001252	positive regulation of chromosome organization	6/3745	78/107890	0.0539984	0.472129	0.443082	TraesCS4A02G372200/TraesCS7D02G069700/TraesCS7A02G074600/TraesCS4D02G145700/TraesCS6B02G350800/TraesCS6B02G356900	6	BP
GO:0000393	spliceosomal conformational changes to generate catalytic conformation	3/3745	25/107890	0.0544385	0.472129	0.443082	TraesCS6D02G294500/TraesCS6D02G197000/TraesCS3A02G210800	3	BP
GO:0042098	T cell proliferation	3/3745	25/107890	0.0544385	0.472129	0.443082	TraesCS2D02G480300/TraesCS6B02G344100/TraesCS4D02G091500	3	BP
GO:1902882	regulation of response to oxidative stress	3/3745	25/107890	0.0544385	0.472129	0.443082	TraesCS6D02G320800/TraesCS6D02G203800/TraesCS6B02G371500	3	BP
GO:0070192	chromosome organization involved in meiotic cell cycle	18/3745	342/107890	0.0546146	0.472129	0.443082	TraesCS7A02G255400/TraesCS6D02G315400/TraesCS7A02G279000/TraesCS7A02G233700/TraesCS6D02G196000/TraesCS7A02G247500/TraesCS6D02G341400/TraesCS1B02G328200/TraesCS6D02G229100/TraesCS1B02G244100/TraesCS5A02G099700/TraesCS6B02G333700/TraesCS6B02G366400/TraesCS6B02G356900/TraesCS3D02G145600/TraesCS6B02G399000/TraesCS6B02G351900/TraesCS3D02G235200	18	BP
GO:0009687	abscisic acid metabolic process	11/3745	183/107890	0.0554723	0.474857	0.445642	TraesCS7A02G256900/TraesCS2B02G106500/TraesCS4B02G095400/TraesCS5B02G375900/TraesCS6A02G271300/TraesCS3A02G289900/TraesCS3D02G289600/TraesCS6B02G298500/TraesCS3B02G324500/TraesCS3D02G166900/TraesCS3A02G210800	11	BP
GO:0043288	apocarotenoid metabolic process	11/3745	183/107890	0.0554723	0.474857	0.445642	TraesCS7A02G256900/TraesCS2B02G106500/TraesCS4B02G095400/TraesCS5B02G375900/TraesCS6A02G271300/TraesCS3A02G289900/TraesCS3D02G289600/TraesCS6B02G298500/TraesCS3B02G324500/TraesCS3D02G166900/TraesCS3A02G210800	11	BP
GO:1902644	tertiary alcohol metabolic process	11/3745	183/107890	0.0554723	0.474857	0.445642	TraesCS7A02G256900/TraesCS2B02G106500/TraesCS4B02G095400/TraesCS5B02G375900/TraesCS6A02G271300/TraesCS3A02G289900/TraesCS3D02G289600/TraesCS6B02G298500/TraesCS3B02G324500/TraesCS3D02G166900/TraesCS3A02G210800	11	BP
GO:1903338	regulation of cell wall organization or biogenesis	6/3745	79/107890	0.0567975	0.482846	0.45314	TraesCS6D02G274900/TraesCS4D02G341000/TraesCS4B02G346100/TraesCS5A02G515000/TraesCS2D02G444200/TraesCS3D02G220700	6	BP
GO:0000387	spliceosomal snRNP assembly	5/3745	60/107890	0.057056	0.482846	0.45314	TraesCS6D02G188600/TraesCS6D02G182200/TraesCS6B02G231100/TraesCS6B02G230500/TraesCS6B02G415500	5	BP
GO:0009846	pollen germination	18/3745	344/107890	0.0571099	0.482846	0.45314	TraesCS6D02G258600/TraesCS6D02G263000/TraesCS6D02G390100/TraesCS7A02G225400/TraesCS7A02G262100/TraesCS6D02G210300/TraesCS6D02G360700/TraesCS6B02G333500/TraesCS7A02G298600/TraesCS7D02G294300/TraesCS6B02G468200/TraesCS7B02G188400/TraesCS6B02G456500/TraesCS4B02G173300/TraesCS6B02G451200/TraesCS6A02G189700/TraesCS5D02G392200/TraesCS5A02G382800	18	BP
GO:0009303	rRNA transcription	4/3745	42/107890	0.0571405	0.482846	0.45314	TraesCS6D02G213900/TraesCS6D02G325000/TraesCS1B02G265700/TraesCS6B02G376100	4	BP
GO:0046655	folic acid metabolic process	3/3745	26/107890	0.0600047	0.487294	0.457314	TraesCS7A02G276800/TraesCS7A02G276900/TraesCS3D02G167700	3	BP
GO:0046656	folic acid biosynthetic process	3/3745	26/107890	0.0600047	0.487294	0.457314	TraesCS7A02G276800/TraesCS7A02G276900/TraesCS3D02G167700	3	BP
GO:0048872	homeostasis of number of cells	3/3745	26/107890	0.0600047	0.487294	0.457314	TraesCS6D02G315400/TraesCS4B02G109300/TraesCS6B02G366400	3	BP
GO:0070084	protein initiator methionine removal	3/3745	26/107890	0.0600047	0.487294	0.457314	TraesCS7A02G266100/TraesCS6B02G352500/TraesCS6B02G352400	3	BP
GO:0071366	cellular response to indolebutyric acid stimulus	3/3745	26/107890	0.0600047	0.487294	0.457314	TraesCS5B02G155400/TraesCS5B02G155600/TraesCS7B02G271600	3	BP
GO:0010921	regulation of phosphatase activity	5/3745	61/107890	0.0604525	0.487294	0.457314	TraesCS7B02G278100/TraesCS3A02G210300/TraesCS7D02G364600/TraesCS7A02G358200/TraesCS7B02G269600	5	BP
GO:0071158	positive regulation of cell cycle arrest	4/3745	43/107890	0.061341	0.487294	0.457314	TraesCS6D02G195300/TraesCS6D02G305800/TraesCS6D02G192000/TraesCS6B02G356400	4	BP
GO:0072331	signal transduction by p53 class mediator	4/3745	43/107890	0.061341	0.487294	0.457314	TraesCS6D02G195300/TraesCS6D02G305800/TraesCS6D02G192000/TraesCS6B02G356400	4	BP
GO:1905268	negative regulation of chromatin organization	4/3745	43/107890	0.061341	0.487294	0.457314	TraesCS6D02G196000/TraesCS4A02G372200/TraesCS7D02G069700/TraesCS7A02G074600	4	BP
GO:0048666	neuron development	17/3745	324/107890	0.0617803	0.487294	0.457314	TraesCS6D02G270300/TraesCS6D02G242400/TraesCS7A02G257800/TraesCS1D02G406300/TraesCS7A02G272700/TraesCS7A02G262700/TraesCS3B02G146300/TraesCS5B02G047900/TraesCS1B02G266200/TraesCS5B02G159100/TraesCS6B02G377200/TraesCS6B02G335200/TraesCS7A02G419900/TraesCS6B02G396100/TraesCS3D02G165500/TraesCS6B02G229900/TraesCS4D02G305100	17	BP
GO:0000070	mitotic sister chromatid segregation	16/3745	301/107890	0.0623989	0.487294	0.457314	TraesCS7A02G278700/TraesCS6D02G191700/TraesCS6D02G233200/TraesCS6D02G207900/TraesCS6D02G327000/TraesCS6D02G354500/TraesCS7D02G057500/TraesCS7A02G155100/TraesCS1B02G244100/TraesCS4B02G308700/TraesCS6A02G309600/TraesCS6B02G341400/TraesCS7B02G176600/TraesCS6B02G236700/TraesCS6B02G377000/TraesCS6B02G407600	16	BP
GO:0005992	trehalose biosynthetic process	6/3745	81/107890	0.0626522	0.487294	0.457314	TraesCS7A02G209600/TraesCS6D02G334000/TraesCS6B02G235400/TraesCS6B02G384500/TraesCS1B02G224300/TraesCS6B02G330900	6	BP
GO:0006271	DNA strand elongation involved in DNA replication	6/3745	81/107890	0.0626522	0.487294	0.457314	TraesCS6D02G315400/TraesCS6D02G302200/TraesCS6D02G357600/TraesCS6D02G251900/TraesCS6B02G366400/TraesCS6B02G353100	6	BP
GO:0008216	spermidine metabolic process	6/3745	81/107890	0.0626522	0.487294	0.457314	TraesCS7A02G265300/TraesCS7A02G265200/TraesCS7A02G220000/TraesCS6D02G202500/TraesCS6D02G202400/TraesCS1D02G012300	6	BP
GO:0000350	generation of catalytic spliceosome for second transesterification step	2/3745	12/107890	0.0631144	0.487294	0.457314	TraesCS6D02G294500/TraesCS6D02G197000	2	BP
GO:0001756	somitogenesis	2/3745	12/107890	0.0631144	0.487294	0.457314	TraesCS6B02G405200/TraesCS6B02G350800	2	BP
GO:0002103	endonucleolytic cleavage of tetracistronic rRNA transcript (SSU-rRNA, LSU-rRNA, 4.5S-rRNA, 5S-rRNA)	2/3745	12/107890	0.0631144	0.487294	0.457314	TraesCS6B02G010000/TraesCS6B02G344700	2	BP
GO:0015825	L-serine transport	2/3745	12/107890	0.0631144	0.487294	0.457314	TraesCS6D02G336100/TraesCS6B02G386500	2	BP
GO:0031154	culmination involved in sorocarp development	2/3745	12/107890	0.0631144	0.487294	0.457314	TraesCS3A02G211000/TraesCS6B02G403400	2	BP
GO:0032329	serine transport	2/3745	12/107890	0.0631144	0.487294	0.457314	TraesCS6D02G336100/TraesCS6B02G386500	2	BP
GO:0033189	response to vitamin A	2/3745	12/107890	0.0631144	0.487294	0.457314	TraesCS6D02G294500/TraesCS6B02G345700	2	BP
GO:0034729	histone H3-K79 methylation	2/3745	12/107890	0.0631144	0.487294	0.457314	TraesCS4D02G145700/TraesCS6B02G350800	2	BP
GO:0045638	negative regulation of myeloid cell differentiation	2/3745	12/107890	0.0631144	0.487294	0.457314	TraesCS4D02G145700/TraesCS6B02G350800	2	BP
GO:0050670	regulation of lymphocyte proliferation	2/3745	12/107890	0.0631144	0.487294	0.457314	TraesCS2D02G480300/TraesCS4D02G091500	2	BP
GO:0061053	somite development	2/3745	12/107890	0.0631144	0.487294	0.457314	TraesCS6B02G405200/TraesCS6B02G350800	2	BP
GO:0071722	detoxification of arsenic-containing substance	2/3745	12/107890	0.0631144	0.487294	0.457314	TraesCS6D02G257400/TraesCS6B02G336000	2	BP
GO:1903707	negative regulation of hemopoiesis	2/3745	12/107890	0.0631144	0.487294	0.457314	TraesCS4D02G145700/TraesCS6B02G350800	2	BP
GO:0001666	response to hypoxia	20/3745	397/107890	0.064074	0.487294	0.457314	TraesCS6D02G254700/TraesCS6D02G250800/TraesCS6D02G358000/TraesCS6D02G287000/TraesCS7B02G283000/TraesCS7B02G093800/TraesCS3B02G119800/TraesCS6B02G450700/TraesCS6B02G336400/TraesCS6B02G430100/TraesCS4B02G175100/TraesCS5D02G031600/TraesCS5A02G025200/TraesCS6B02G411500/TraesCS3D02G091700/TraesCS6D02G080500/TraesCS6A02G091700/TraesCS3B02G106900/TraesCS4D02G103300/TraesCS4A02G202300	20	BP
GO:0048359	mucilage metabolic process involved in seed coat development	9/3745	144/107890	0.0644126	0.487294	0.457314	TraesCS7A02G211600/TraesCS6D02G319900/TraesCS6B02G369400/TraesCS1A02G033200/TraesCS4D02G112900/TraesCS6B02G370300/TraesCS4B02G115200/TraesCS1D02G034600/TraesCS2A02G132600	9	BP
GO:0010565	regulation of cellular ketone metabolic process	19/3745	374/107890	0.0653098	0.487294	0.457314	TraesCS6D02G195300/TraesCS6D02G358000/TraesCS6D02G179200/TraesCS6D02G335000/TraesCS6D02G251700/TraesCS7A02G261700/TraesCS2B02G106500/TraesCS4B02G095400/TraesCS3A02G289900/TraesCS6B02G234200/TraesCS3D02G289600/TraesCS6B02G385200/TraesCS6B02G226200/TraesCS3B02G324500/TraesCS5B02G153300/TraesCS4B02G120800/TraesCS6B02G411500/TraesCS6D02G080500/TraesCS6A02G091700	19	BP
GO:0030030	cell projection organization	19/3745	374/107890	0.0653098	0.487294	0.457314	TraesCS6D02G270300/TraesCS6D02G242400/TraesCS6D02G396300/TraesCS1D02G406300/TraesCS2D02G218400/TraesCS7A02G272700/TraesCS7A02G262700/TraesCS3B02G146300/TraesCS1B02G266200/TraesCS5B02G159100/TraesCS6B02G377200/TraesCS6B02G335200/TraesCS7A02G419900/TraesCS6B02G396100/TraesCS3D02G165500/TraesCS4D02G091500/TraesCS6B02G229900/TraesCS6B02G461200/TraesCS4D02G305100	19	BP
GO:0045143	homologous chromosome segregation	16/3745	303/107890	0.0653572	0.487294	0.457314	TraesCS7A02G255400/TraesCS6D02G315400/TraesCS7A02G279000/TraesCS7A02G233700/TraesCS6D02G196000/TraesCS7A02G247500/TraesCS6D02G341400/TraesCS1B02G328200/TraesCS6D02G229100/TraesCS5A02G099700/TraesCS6B02G333700/TraesCS6B02G366400/TraesCS6B02G356900/TraesCS3D02G145600/TraesCS6B02G351900/TraesCS3D02G235200	16	BP
GO:0042726	flavin-containing compound metabolic process	4/3745	44/107890	0.0657	0.487294	0.457314	TraesCS6D02G378500/TraesCS6B02G230600/TraesCS7A02G415600/TraesCS6B02G433000	4	BP
GO:0001745	compound eye morphogenesis	3/3745	27/107890	0.0658255	0.487294	0.457314	TraesCS6B02G377200/TraesCS6B02G335200/TraesCS4D02G305100	3	BP
GO:0006384	transcription initiation from RNA polymerase III promoter	3/3745	27/107890	0.0658255	0.487294	0.457314	TraesCS6D02G213900/TraesCS6D02G309500/TraesCS6B02G361300	3	BP
GO:0010021	amylopectin biosynthetic process	3/3745	27/107890	0.0658255	0.487294	0.457314	TraesCS6D02G287000/TraesCS7B02G093800/TraesCS6B02G336400	3	BP
GO:0035067	negative regulation of histone acetylation	3/3745	27/107890	0.0658255	0.487294	0.457314	TraesCS4A02G372200/TraesCS7D02G069700/TraesCS7A02G074600	3	BP
GO:0050829	defense response to Gram-negative bacterium	3/3745	27/107890	0.0658255	0.487294	0.457314	TraesCS1D02G218400/TraesCS5B02G219700/TraesCS5A02G220600	3	BP
GO:0060236	regulation of mitotic spindle organization	3/3745	27/107890	0.0658255	0.487294	0.457314	TraesCS5D02G184300/TraesCS5A02G179700/TraesCS5B02G177500	3	BP
GO:0080163	regulation of protein serine/threonine phosphatase activity	3/3745	27/107890	0.0658255	0.487294	0.457314	TraesCS7D02G364600/TraesCS7A02G358200/TraesCS7B02G269600	3	BP
GO:0090224	regulation of spindle organization	3/3745	27/107890	0.0658255	0.487294	0.457314	TraesCS5D02G184300/TraesCS5A02G179700/TraesCS5B02G177500	3	BP
GO:1901984	negative regulation of protein acetylation	3/3745	27/107890	0.0658255	0.487294	0.457314	TraesCS4A02G372200/TraesCS7D02G069700/TraesCS7A02G074600	3	BP
GO:2000757	negative regulation of peptidyl-lysine acetylation	3/3745	27/107890	0.0658255	0.487294	0.457314	TraesCS4A02G372200/TraesCS7D02G069700/TraesCS7A02G074600	3	BP
GO:2000896	amylopectin metabolic process	3/3745	27/107890	0.0658255	0.487294	0.457314	TraesCS6D02G287000/TraesCS7B02G093800/TraesCS6B02G336400	3	BP
GO:0072507	divalent inorganic cation homeostasis	14/3745	257/107890	0.0662114	0.488774	0.458703	TraesCS6D02G204000/TraesCS6D02G187200/TraesCS6D02G211700/TraesCS5B02G462600/TraesCS6B02G344100/TraesCS4A02G405400/TraesCS2D02G356300/TraesCS6B02G250200/TraesCS6B02G224100/TraesCS7A02G419500/TraesCS7A02G420000/TraesCS6B02G382300/TraesCS6B02G396200/TraesCS6B02G382500	14	BP
GO:0009110	vitamin biosynthetic process	24/3745	496/107890	0.0665472	0.489877	0.459738	TraesCS7A02G286300/TraesCS6D02G286900/TraesCS6D02G245200/TraesCS7A02G276800/TraesCS7A02G276900/TraesCS6D02G219600/TraesCS6D02G370600/TraesCS6D02G378500/TraesCS7A02G232400/TraesCS1B02G245400/TraesCS1B02G253900/TraesCS1B02G255100/TraesCS7A02G234200/TraesCS1B02G266500/TraesCS2A02G439900/TraesCS6B02G230600/TraesCS6B02G402400/TraesCS6B02G336300/TraesCS3D02G167700/TraesCS7A02G415600/TraesCS6B02G433000/…	24	BP
GO:0048864	stem cell development	16/3745	304/107890	0.0668712	0.490887	0.460686	TraesCS7A02G260600/TraesCS6D02G293200/TraesCS1A02G199900/TraesCS3A02G432900/TraesCS3D02G427900/TraesCS3A02G434900/TraesCS2B02G300500/TraesCS7D02G261900/TraesCS5D02G454200/TraesCS2D02G442200/TraesCS3D02G428000/TraesCS7B02G158900/TraesCS7D02G176700/TraesCS6B02G350800/TraesCS6B02G343900/TraesCS6B02G466700	16	BP
GO:0007094	mitotic spindle assembly checkpoint	5/3745	63/107890	0.0675821	0.493349	0.462996	TraesCS6D02G191700/TraesCS6D02G233200/TraesCS6D02G327000/TraesCS6A02G309600/TraesCS6B02G236700	5	BP
GO:0071174	mitotic spindle checkpoint	5/3745	63/107890	0.0675821	0.493349	0.462996	TraesCS6D02G191700/TraesCS6D02G233200/TraesCS6D02G327000/TraesCS6A02G309600/TraesCS6B02G236700	5	BP
GO:0007088	regulation of mitotic nuclear division	10/3745	168/107890	0.0691378	0.496437	0.465894	TraesCS6D02G191700/TraesCS6D02G233200/TraesCS6D02G327000/TraesCS6D02G354500/TraesCS7A02G155100/TraesCS4B02G308700/TraesCS6A02G309600/TraesCS6B02G236700/TraesCS6B02G377000/TraesCS6B02G407600	10	BP
GO:0010100	negative regulation of photomorphogenesis	4/3745	45/107890	0.0702156	0.496437	0.465894	TraesCS6D02G305800/TraesCS6A02G216400/TraesCS6B02G356400/TraesCS3A02G210100	4	BP
GO:0006626	protein targeting to mitochondrion	21/3745	426/107890	0.0704248	0.496437	0.465894	TraesCS6D02G205400/TraesCS6D02G188600/TraesCS7A02G282000/TraesCS6D02G242400/TraesCS6D02G272800/TraesCS6D02G341300/TraesCS6D02G240500/TraesCS6D02G298000/TraesCS7A02G262900/TraesCS6D02G214000/TraesCS6D02G380400/TraesCS6D02G341400/TraesCS1B02G199200/TraesCS5A02G099700/TraesCS1B02G250000/TraesCS5D02G529900/TraesCS4B02G175300/TraesCS6B02G391200/TraesCS6B02G230500/TraesCS6B02G349000/TraesCS6B02G435000	21	BP
GO:0070585	protein localization to mitochondrion	21/3745	426/107890	0.0704248	0.496437	0.465894	TraesCS6D02G205400/TraesCS6D02G188600/TraesCS7A02G282000/TraesCS6D02G242400/TraesCS6D02G272800/TraesCS6D02G341300/TraesCS6D02G240500/TraesCS6D02G298000/TraesCS7A02G262900/TraesCS6D02G214000/TraesCS6D02G380400/TraesCS6D02G341400/TraesCS1B02G199200/TraesCS5A02G099700/TraesCS1B02G250000/TraesCS5D02G529900/TraesCS4B02G175300/TraesCS6B02G391200/TraesCS6B02G230500/TraesCS6B02G349000/TraesCS6B02G435000	21	BP
GO:0072655	establishment of protein localization to mitochondrion	21/3745	426/107890	0.0704248	0.496437	0.465894	TraesCS6D02G205400/TraesCS6D02G188600/TraesCS7A02G282000/TraesCS6D02G242400/TraesCS6D02G272800/TraesCS6D02G341300/TraesCS6D02G240500/TraesCS6D02G298000/TraesCS7A02G262900/TraesCS6D02G214000/TraesCS6D02G380400/TraesCS6D02G341400/TraesCS1B02G199200/TraesCS5A02G099700/TraesCS1B02G250000/TraesCS5D02G529900/TraesCS4B02G175300/TraesCS6B02G391200/TraesCS6B02G230500/TraesCS6B02G349000/TraesCS6B02G435000	21	BP
GO:0031175	neuron projection development	14/3745	260/107890	0.0713086	0.496437	0.465894	TraesCS6D02G270300/TraesCS6D02G242400/TraesCS1D02G406300/TraesCS7A02G262700/TraesCS3B02G146300/TraesCS1B02G266200/TraesCS5B02G159100/TraesCS6B02G377200/TraesCS6B02G335200/TraesCS7A02G419900/TraesCS6B02G396100/TraesCS3D02G165500/TraesCS6B02G229900/TraesCS4D02G305100	14	BP
GO:0000045	autophagosome assembly	5/3745	64/107890	0.0713142	0.496437	0.465894	TraesCS7A02G208300/TraesCS6D02G315600/TraesCS7B02G070300/TraesCS6B02G366600/TraesCS6B02G386200	5	BP
GO:0071173	spindle assembly checkpoint	5/3745	64/107890	0.0713142	0.496437	0.465894	TraesCS6D02G191700/TraesCS6D02G233200/TraesCS6D02G327000/TraesCS6A02G309600/TraesCS6B02G236700	5	BP
GO:0010364	regulation of ethylene biosynthetic process	3/3745	28/107890	0.0718938	0.496437	0.465894	TraesCS6D02G335000/TraesCS6B02G385200/TraesCS6B02G226200	3	BP
GO:0018202	peptidyl-histidine modification	3/3745	28/107890	0.0718938	0.496437	0.465894	TraesCS6D02G371300/TraesCS6B02G415800/TraesCS6B02G425800	3	BP
GO:0031335	regulation of sulfur amino acid metabolic process	3/3745	28/107890	0.0718938	0.496437	0.465894	TraesCS6D02G335000/TraesCS6B02G385200/TraesCS6B02G226200	3	BP
GO:0140115	export across plasma membrane	3/3745	28/107890	0.0718938	0.496437	0.465894	TraesCS2D02G135600/TraesCS4B02G081100/TraesCS6B02G360900	3	BP
GO:1900908	regulation of olefin metabolic process	3/3745	28/107890	0.0718938	0.496437	0.465894	TraesCS6D02G335000/TraesCS6B02G385200/TraesCS6B02G226200	3	BP
GO:1900911	regulation of olefin biosynthetic process	3/3745	28/107890	0.0718938	0.496437	0.465894	TraesCS6D02G335000/TraesCS6B02G385200/TraesCS6B02G226200	3	BP
GO:1903409	reactive oxygen species biosynthetic process	15/3745	284/107890	0.0724265	0.496437	0.465894	TraesCS7A02G210100/TraesCS6D02G272400/TraesCS6D02G325100/TraesCS6D02G236400/TraesCS1B02G265300/TraesCS6D02G020700/TraesCS3D02G366500/TraesCS5D02G230300/TraesCS6B02G436400/TraesCS4D02G133700/TraesCS6B02G415700/TraesCS6B02G376200/TraesCS2A02G368700/TraesCS6B02G356800/TraesCS6A02G326200	15	BP
GO:0000478	endonucleolytic cleavage involved in rRNA processing	8/3745	126/107890	0.0728753	0.496437	0.465894	TraesCS7A02G286200/TraesCS6D02G384500/TraesCS6D02G272800/TraesCS6B02G010000/TraesCS4D02G167600/TraesCS6B02G440500/TraesCS3A02G209700/TraesCS6B02G344700	8	BP
GO:0001560	regulation of cell growth by extracellular stimulus	2/3745	13/107890	0.0729165	0.496437	0.465894	TraesCS4A02G158000/TraesCS6B02G369300	2	BP
GO:0006127	glycerophosphate shuttle	2/3745	13/107890	0.0729165	0.496437	0.465894	TraesCS2D02G408700/TraesCS2B02G430000	2	BP
GO:0006616	SRP-dependent cotranslational protein targeting to membrane, translocation	2/3745	13/107890	0.0729165	0.496437	0.465894	TraesCS3A02G207800/TraesCS4A02G066100	2	BP
GO:0010971	positive regulation of G2/M transition of mitotic cell cycle	2/3745	13/107890	0.0729165	0.496437	0.465894	TraesCS7B02G216700/TraesCS7D02G312700	2	BP
GO:0016107	sesquiterpenoid catabolic process	2/3745	13/107890	0.0729165	0.496437	0.465894	TraesCS6A02G271300/TraesCS6B02G298500	2	BP
GO:0030242	autophagy of peroxisome	2/3745	13/107890	0.0729165	0.496437	0.465894	TraesCS7A02G208300/TraesCS7B02G115500	2	BP
GO:0043290	apocarotenoid catabolic process	2/3745	13/107890	0.0729165	0.496437	0.465894	TraesCS6A02G271300/TraesCS6B02G298500	2	BP
GO:0046345	abscisic acid catabolic process	2/3745	13/107890	0.0729165	0.496437	0.465894	TraesCS6A02G271300/TraesCS6B02G298500	2	BP
GO:1900117	regulation of execution phase of apoptosis	2/3745	13/107890	0.0729165	0.496437	0.465894	TraesCS6D02G192000/TraesCS2A02G396400	2	BP
GO:1902751	positive regulation of cell cycle G2/M phase transition	2/3745	13/107890	0.0729165	0.496437	0.465894	TraesCS7B02G216700/TraesCS7D02G312700	2	BP
GO:0042364	water-soluble vitamin biosynthetic process	18/3745	356/107890	0.0737495	0.500811	0.469999	TraesCS7A02G286300/TraesCS7A02G276800/TraesCS7A02G276900/TraesCS6D02G370600/TraesCS6D02G378500/TraesCS7A02G232400/TraesCS1B02G245400/TraesCS1B02G255100/TraesCS7A02G234200/TraesCS1B02G266500/TraesCS2A02G439900/TraesCS6B02G230600/TraesCS6B02G402400/TraesCS3D02G167700/TraesCS7A02G415600/TraesCS6B02G433000/TraesCS1A02G416700/TraesCS7A02G317500	18	BP
GO:0071156	regulation of cell cycle arrest	14/3745	262/107890	0.074846	0.50125	0.470411	TraesCS6D02G195300/TraesCS6D02G315400/TraesCS6D02G305800/TraesCS7A02G214200/TraesCS6D02G302200/TraesCS7A02G213600/TraesCS6D02G233200/TraesCS6D02G192000/TraesCS6D02G327000/TraesCS6B02G366400/TraesCS6B02G334400/TraesCS6B02G356400/TraesCS6B02G353100/TraesCS7B02G115400	14	BP
GO:0009200	deoxyribonucleoside triphosphate metabolic process	4/3745	46/107890	0.0748859	0.50125	0.470411	TraesCS6D02G357100/TraesCS7B02G119100/TraesCS6B02G410800/TraesCS6B02G381500	4	BP
GO:0051960	regulation of nervous system development	5/3745	65/107890	0.075157	0.50125	0.470411	TraesCS6D02G294500/TraesCS7A02G228200/TraesCS7A02G227400/TraesCS6D02G242400/TraesCS6B02G345700	5	BP
GO:1905037	autophagosome organization	5/3745	65/107890	0.075157	0.50125	0.470411	TraesCS7A02G208300/TraesCS6D02G315600/TraesCS7B02G070300/TraesCS6B02G366600/TraesCS6B02G386200	5	BP
GO:0042326	negative regulation of phosphorylation	18/3745	357/107890	0.0752682	0.50125	0.470411	TraesCS6D02G336200/TraesCS6D02G263500/TraesCS6D02G301100/TraesCS6A02G037000/TraesCSU02G125400/TraesCS5A02G552500/TraesCS1B02G243500/TraesCS4B02G388100/TraesCS7B02G027500/TraesCS1B02G255700/TraesCS3B02G573800/TraesCS3D02G513300/TraesCS6B02G235500/TraesCS6B02G352100/TraesCS6B02G345300/TraesCS5B02G159300/TraesCS6B02G386600/TraesCS5D02G247100	18	BP
GO:0033869	nucleoside bisphosphate catabolic process	8/3745	127/107890	0.0755308	0.50125	0.470411	TraesCS6D02G183200/TraesCS6D02G192900/TraesCS7A02G219100/TraesCS7A02G256900/TraesCS2B02G244600/TraesCS6B02G440200/TraesCS6B02G235000/TraesCS6B02G238500	8	BP
GO:0034031	ribonucleoside bisphosphate catabolic process	8/3745	127/107890	0.0755308	0.50125	0.470411	TraesCS6D02G183200/TraesCS6D02G192900/TraesCS7A02G219100/TraesCS7A02G256900/TraesCS2B02G244600/TraesCS6B02G440200/TraesCS6B02G235000/TraesCS6B02G238500	8	BP
GO:0034034	purine nucleoside bisphosphate catabolic process	8/3745	127/107890	0.0755308	0.50125	0.470411	TraesCS6D02G183200/TraesCS6D02G192900/TraesCS7A02G219100/TraesCS7A02G256900/TraesCS2B02G244600/TraesCS6B02G440200/TraesCS6B02G235000/TraesCS6B02G238500	8	BP
GO:0071216	cellular response to biotic stimulus	8/3745	127/107890	0.0755308	0.50125	0.470411	TraesCS6B02G234200/TraesCS3D02G164500/TraesCS6B02G350800/TraesCS5D02G244800/TraesCS4B02G120800/TraesCS5A02G237900/TraesCS5B02G236400/TraesCS4D02G305100	8	BP
GO:0000741	karyogamy	20/3745	407/107890	0.0777798	0.514875	0.483198	TraesCS6D02G253600/TraesCS6D02G207200/TraesCS6D02G190000/TraesCS2A02G117600/TraesCS2B02G137500/TraesCS4A02G289700/TraesCS2B02G137600/TraesCS3B02G145400/TraesCS3B02G210900/TraesCS4B02G024300/TraesCS1D02G042400/TraesCS5B02G446900/TraesCS4B02G126500/TraesCS5B02G157800/TraesCS6B02G225700/TraesCS6B02G239800/TraesCS4D02G144500/TraesCS6B02G415500/TraesCS4A02G066100/TraesCS4D02G096800	20	BP
GO:0010199	organ boundary specification between lateral organs and the meristem	3/3745	29/107890	0.0782023	0.515077	0.483387	TraesCS3A02G140700/TraesCS4A02G067300/TraesCS4D02G225200	3	BP
GO:1900424	regulation of defense response to bacterium	3/3745	29/107890	0.0782023	0.515077	0.483387	TraesCS6D02G179200/TraesCS2A02G292600/TraesCS2D02G290400	3	BP
GO:0000084	mitotic S phase	6/3745	86/107890	0.0787851	0.516327	0.484561	TraesCS6D02G195300/TraesCS6D02G315400/TraesCS6D02G302200/TraesCS7A02G213600/TraesCS6B02G366400/TraesCS6B02G353100	6	BP
GO:0051320	S phase	6/3745	86/107890	0.0787851	0.516327	0.484561	TraesCS6D02G195300/TraesCS6D02G315400/TraesCS6D02G302200/TraesCS7A02G213600/TraesCS6B02G366400/TraesCS6B02G353100	6	BP
GO:1900865	chloroplast RNA modification	5/3745	66/107890	0.0791097	0.517165	0.485347	TraesCS7A02G262500/TraesCS7A02G265000/TraesCS6B02G010000/TraesCS3D02G101500/TraesCS6B02G344700	5	BP
GO:0048579	negative regulation of long-day photoperiodism, flowering	4/3745	47/107890	0.0797088	0.518819	0.4869	TraesCS7A02G218600/TraesCS6B02G113100/TraesCS7A02G263500/TraesCS6D02G267100	4	BP
GO:0009838	abscission	16/3745	312/107890	0.0798322	0.518819	0.4869	TraesCS6D02G186900/TraesCS7A02G236400/TraesCS6D02G328800/TraesCS4D02G329400/TraesCS4A02G362100/TraesCS6B02G223700/TraesCS2A02G175000/TraesCS5D02G107900/TraesCS6B02G379500/TraesCS5B02G101400/TraesCS6B02G418400/TraesCS5A02G095200/TraesCS2D02G182400/TraesCS4D02G120400/TraesCS2B02G201400/TraesCS3D02G403000	16	BP
GO:0000469	cleavage involved in rRNA processing	9/3745	151/107890	0.0812078	0.518819	0.4869	TraesCS7A02G286200/TraesCS6D02G269300/TraesCS6D02G384500/TraesCS6D02G272800/TraesCS6B02G010000/TraesCS4D02G167600/TraesCS6B02G440500/TraesCS3A02G209700/TraesCS6B02G344700	9	BP
GO:0036503	ERAD pathway	9/3745	151/107890	0.0812078	0.518819	0.4869	TraesCS7A02G220000/TraesCS6D02G187100/TraesCS7A02G274800/TraesCS1D02G330800/TraesCS5B02G054600/TraesCS6B02G376500/TraesCS6B02G341600/TraesCS6B02G339600/TraesCS4A02G066100	9	BP
GO:0072350	tricarboxylic acid metabolic process	6/3745	87/107890	0.0822667	0.518819	0.4869	TraesCS6D02G192900/TraesCS7A02G219100/TraesCS1B02G257300/TraesCS6B02G440200/TraesCS6B02G235000/TraesCS6B02G238500	6	BP
GO:0007204	positive regulation of cytosolic calcium ion concentration	2/3745	14/107890	0.083167	0.518819	0.4869	TraesCS6B02G344100/TraesCS4A02G405400	2	BP
GO:0008217	regulation of blood pressure	2/3745	14/107890	0.083167	0.518819	0.4869	TraesCS6B02G425700/TraesCS5D02G479300	2	BP
GO:0009202	deoxyribonucleoside triphosphate biosynthetic process	2/3745	14/107890	0.083167	0.518819	0.4869	TraesCS6D02G357100/TraesCS6B02G410800	2	BP
GO:0009432	SOS response	2/3745	14/107890	0.083167	0.518819	0.4869	TraesCS6D02G320500/TraesCS6B02G371000	2	BP
GO:0042058	regulation of epidermal growth factor receptor signaling pathway	2/3745	14/107890	0.083167	0.518819	0.4869	TraesCS6D02G336200/TraesCS6B02G386600	2	BP
GO:0042059	negative regulation of epidermal growth factor receptor signaling pathway	2/3745	14/107890	0.083167	0.518819	0.4869	TraesCS6D02G336200/TraesCS6B02G386600	2	BP
GO:0046874	quinolinate metabolic process	2/3745	14/107890	0.083167	0.518819	0.4869	TraesCS7A02G278400/TraesCS7B02G175800	2	BP
GO:0048838	release of seed from dormancy	2/3745	14/107890	0.083167	0.518819	0.4869	TraesCS6A02G271300/TraesCS6B02G298500	2	BP
GO:0061158	3'-UTR-mediated mRNA destabilization	2/3745	14/107890	0.083167	0.518819	0.4869	TraesCS3A02G232500/TraesCS3D02G220700	2	BP
GO:0080182	histone H3-K4 trimethylation	2/3745	14/107890	0.083167	0.518819	0.4869	TraesCS4D02G145700/TraesCS6B02G350800	2	BP
GO:0097438	exit from dormancy	2/3745	14/107890	0.083167	0.518819	0.4869	TraesCS6A02G271300/TraesCS6B02G298500	2	BP
GO:1901184	regulation of ERBB signaling pathway	2/3745	14/107890	0.083167	0.518819	0.4869	TraesCS6D02G336200/TraesCS6B02G386600	2	BP
GO:1901185	negative regulation of ERBB signaling pathway	2/3745	14/107890	0.083167	0.518819	0.4869	TraesCS6D02G336200/TraesCS6B02G386600	2	BP
GO:0010115	regulation of abscisic acid biosynthetic process	5/3745	67/107890	0.0831716	0.518819	0.4869	TraesCS2B02G106500/TraesCS4B02G095400/TraesCS3A02G289900/TraesCS3D02G289600/TraesCS3B02G324500	5	BP
GO:0120036	plasma membrane bounded cell projection organization	16/3745	314/107890	0.0833112	0.518819	0.4869	TraesCS6D02G270300/TraesCS6D02G242400/TraesCS6D02G396300/TraesCS1D02G406300/TraesCS7A02G262700/TraesCS3B02G146300/TraesCS1B02G266200/TraesCS5B02G159100/TraesCS6B02G377200/TraesCS6B02G335200/TraesCS7A02G419900/TraesCS6B02G396100/TraesCS3D02G165500/TraesCS6B02G229900/TraesCS6B02G461200/TraesCS4D02G305100	16	BP
GO:0006283	transcription-coupled nucleotide-excision repair	4/3745	48/107890	0.0846818	0.521556	0.489468	TraesCS6D02G315400/TraesCS6D02G302200/TraesCS6B02G366400/TraesCS6B02G353100	4	BP
GO:0007585	respiratory gaseous exchange by respiratory system	4/3745	48/107890	0.0846818	0.521556	0.489468	TraesCS7A02G239000/TraesCS6B02G425700/TraesCS2B02G459000/TraesCS2B02G459100	4	BP
GO:0032968	positive regulation of transcription elongation from RNA polymerase II promoter	4/3745	48/107890	0.0846818	0.521556	0.489468	TraesCS6D02G304800/TraesCS4D02G145700/TraesCS6B02G350800/TraesCS6B02G355400	4	BP
GO:0002182	cytoplasmic translational elongation	3/3745	30/107890	0.084743	0.521556	0.489468	TraesCS6D02G371300/TraesCS6B02G415800/TraesCS6B02G425800	3	BP
GO:0048749	compound eye development	3/3745	30/107890	0.084743	0.521556	0.489468	TraesCS6B02G377200/TraesCS6B02G335200/TraesCS4D02G305100	3	BP
GO:0010074	maintenance of meristem identity	13/3745	244/107890	0.0851342	0.522448	0.490305	TraesCS7A02G260600/TraesCS6D02G293200/TraesCS1A02G199900/TraesCS3A02G432900/TraesCS3D02G427900/TraesCS3A02G434900/TraesCS2B02G300500/TraesCS7D02G261900/TraesCS2D02G442200/TraesCS3D02G428000/TraesCS7B02G158900/TraesCS7D02G176700/TraesCS6B02G343900	13	BP
GO:0010191	mucilage metabolic process	10/3745	175/107890	0.0852855	0.522448	0.490305	TraesCS7A02G211600/TraesCS6D02G319900/TraesCS6B02G369400/TraesCS1A02G033200/TraesCS4D02G112900/TraesCS6B02G370300/TraesCS4B02G115200/TraesCS1D02G034600/TraesCS4B02G346100/TraesCS2A02G132600	10	BP
GO:0005991	trehalose metabolic process	6/3745	88/107890	0.0858324	0.524224	0.491972	TraesCS7A02G209600/TraesCS6D02G334000/TraesCS6B02G235400/TraesCS6B02G384500/TraesCS1B02G224300/TraesCS6B02G330900	6	BP
GO:0051028	mRNA transport	19/3745	388/107890	0.0859744	0.524224	0.491972	TraesCS6D02G311700/TraesCS6D02G213600/TraesCS6D02G219400/TraesCS6D02G341300/TraesCS6D02G266800/TraesCS6B02G083500/TraesCS3B02G162400/TraesCS1B02G266900/TraesCS1B02G270700/TraesCS1B02G063400/TraesCS2D02G480300/TraesCS6B02G373300/TraesCS6B02G456000/TraesCS6A02G309600/TraesCS6B02G337900/TraesCS6B02G391200/TraesCS6B02G363200/TraesCS4B02G173400/TraesCS6B02G239100	19	BP
GO:0031644	regulation of nervous system process	8/3745	131/107890	0.0867273	0.527591	0.495132	TraesCS6D02G270300/TraesCS6D02G234100/TraesCS6D02G190300/TraesCS6D02G187000/TraesCS1A02G021200/TraesCS6D02G238300/TraesCS6D02G349100/TraesCS2D02G533700	8	BP
GO:0031577	spindle checkpoint	5/3745	68/107890	0.0873415	0.5301	0.497487	TraesCS6D02G191700/TraesCS6D02G233200/TraesCS6D02G327000/TraesCS6A02G309600/TraesCS6B02G236700	5	BP
GO:0010440	stomatal lineage progression	6/3745	89/107890	0.0894818	0.540047	0.506821	TraesCS6D02G223800/TraesCS7A02G262100/TraesCS7B02G009900/TraesCS6B02G345300/TraesCS6B02G113800/TraesCS6A02G083300	6	BP
GO:0002238	response to molecule of fungal origin	8/3745	132/107890	0.0896695	0.540047	0.506821	TraesCS6D02G252900/TraesCS6D02G254400/TraesCS1B02G278500/TraesCS6B02G344000/TraesCS4D02G186500/TraesCS2D02G112300/TraesCS2A02G111700/TraesCS2B02G130500	8	BP
GO:0006370	7-methylguanosine mRNA capping	4/3745	49/107890	0.0898023	0.540047	0.506821	TraesCS6D02G203100/TraesCS6D02G274200/TraesCS4B02G116000/TraesCS4B02G115800	4	BP
GO:0046889	positive regulation of lipid biosynthetic process	4/3745	49/107890	0.0898023	0.540047	0.506821	TraesCS4B02G095400/TraesCS3A02G289900/TraesCS3D02G289600/TraesCS3B02G324500	4	BP
GO:0000085	mitotic G2 phase	15/3745	294/107890	0.0905134	0.54041	0.507162	TraesCS6D02G195300/TraesCS6D02G188600/TraesCS6D02G386100/TraesCS6D02G384500/TraesCS6D02G341300/TraesCS6D02G196000/TraesCS3B02G487900/TraesCS1B02G266900/TraesCS1A02G308300/TraesCS6B02G440500/TraesCS6B02G444700/TraesCS6B02G350800/TraesCS6B02G391200/TraesCS6B02G230500/TraesCS6B02G471600	15	BP
GO:0051319	G2 phase	15/3745	294/107890	0.0905134	0.54041	0.507162	TraesCS6D02G195300/TraesCS6D02G188600/TraesCS6D02G386100/TraesCS6D02G384500/TraesCS6D02G341300/TraesCS6D02G196000/TraesCS3B02G487900/TraesCS1B02G266900/TraesCS1A02G308300/TraesCS6B02G440500/TraesCS6B02G444700/TraesCS6B02G350800/TraesCS6B02G391200/TraesCS6B02G230500/TraesCS6B02G471600	15	BP
GO:0008361	regulation of cell size	23/3745	490/107890	0.0913357	0.54041	0.507162	TraesCS7A02G284900/TraesCS6A02G014100/TraesCS6D02G251700/TraesCS6D02G057900/TraesCS1B02G247700/TraesCS6B02G355600/TraesCS3D02G162700/TraesCS6B02G235200/TraesCS2A02G175000/TraesCS6B02G472100/TraesCS6A02G189800/TraesCS5D02G107900/TraesCS4A02G158000/TraesCS5B02G101400/TraesCS6B02G418400/TraesCS3B02G310000/TraesCS5A02G095200/TraesCS6B02G418600/TraesCS2D02G182400/TraesCS3D02G276200/TraesCS3A02G339600/…	23	BP
GO:2000242	negative regulation of reproductive process	13/3745	247/107890	0.0914251	0.54041	0.507162	TraesCS7A02G218600/TraesCS6D02G293200/TraesCS6B02G113100/TraesCS7A02G263500/TraesCS6D02G267100/TraesCS7D02G176700/TraesCS4D02G145700/TraesCS6A02G309600/TraesCS6B02G350800/TraesCS5B02G153300/TraesCS6B02G343900/TraesCS3D02G161800/TraesCS4A02G409200	13	BP
GO:0031086	nuclear-transcribed mRNA catabolic process, deadenylation-independent decay	3/3745	31/107890	0.0915077	0.54041	0.507162	TraesCS6D02G359000/TraesCS4B02G117300/TraesCS6B02G412000	3	BP
GO:0031087	deadenylation-independent decapping of nuclear-transcribed mRNA	3/3745	31/107890	0.0915077	0.54041	0.507162	TraesCS6D02G359000/TraesCS4B02G117300/TraesCS6B02G412000	3	BP
GO:0042344	indole glucosinolate catabolic process	3/3745	31/107890	0.0915077	0.54041	0.507162	TraesCS5B02G155400/TraesCS5B02G155600/TraesCS7B02G271600	3	BP
GO:1901654	response to ketone	3/3745	31/107890	0.0915077	0.54041	0.507162	TraesCS6D02G211900/TraesCS6D02G360800/TraesCS6B02G413500	3	BP
GO:0001751	compound eye photoreceptor cell differentiation	2/3745	15/107890	0.0938231	0.549147	0.515361	TraesCS6B02G377200/TraesCS4D02G305100	2	BP
GO:0007028	cytoplasm organization	2/3745	15/107890	0.0938231	0.549147	0.515361	TraesCS4B02G109300/TraesCS4D02G305100	2	BP
GO:0010113	negative regulation of systemic acquired resistance	2/3745	15/107890	0.0938231	0.549147	0.515361	TraesCS6D02G196000/TraesCS5B02G153300	2	BP
GO:0045912	negative regulation of carbohydrate metabolic process	2/3745	15/107890	0.0938231	0.549147	0.515361	TraesCS2D02G034400/TraesCS2B02G048200	2	BP
GO:0019359	nicotinamide nucleotide biosynthetic process	4/3745	50/107890	0.0950675	0.554484	0.52037	TraesCS7A02G278400/TraesCS6D02G370600/TraesCS1B02G253900/TraesCS7B02G175800	4	BP
GO:0006312	mitotic recombination	13/3745	249/107890	0.0957746	0.554484	0.52037	TraesCS7A02G255400/TraesCS6D02G190800/TraesCS6D02G315400/TraesCS6D02G302200/TraesCS6D02G341400/TraesCS1B02G328200/TraesCS6D02G229100/TraesCS5A02G099700/TraesCS5B02G155000/TraesCS6B02G366400/TraesCS6B02G356900/TraesCS6B02G353100/TraesCS6B02G239100	13	BP
GO:0006772	thiamine metabolic process	5/3745	70/107890	0.0960009	0.554484	0.52037	TraesCS7A02G286300/TraesCS1B02G245400/TraesCS1B02G255100/TraesCS1B02G266500/TraesCS6B02G333700	5	BP
GO:0007219	Notch signaling pathway	5/3745	70/107890	0.0960009	0.554484	0.52037	TraesCS6D02G294500/TraesCS6D02G254700/TraesCS6D02G202800/TraesCS7A02G262700/TraesCS6B02G345700	5	BP
GO:0032875	regulation of DNA endoreduplication	5/3745	70/107890	0.0960009	0.554484	0.52037	TraesCS6D02G233200/TraesCS6D02G291000/TraesCS6D02G354500/TraesCS6B02G341900/TraesCS6B02G407600	5	BP
GO:0042723	thiamine-containing compound metabolic process	5/3745	70/107890	0.0960009	0.554484	0.52037	TraesCS7A02G286300/TraesCS1B02G245400/TraesCS1B02G255100/TraesCS1B02G266500/TraesCS6B02G333700	5	BP
GO:0022616	DNA strand elongation	6/3745	91/107890	0.0970294	0.557972	0.523644	TraesCS6D02G315400/TraesCS6D02G302200/TraesCS6D02G357600/TraesCS6D02G251900/TraesCS6B02G366400/TraesCS6B02G353100	6	BP
GO:0050817	coagulation	6/3745	91/107890	0.0970294	0.557972	0.523644	TraesCS6A02G037600/TraesCS3D02G033700/TraesCS5B02G159100/TraesCS5B02G155400/TraesCS3A02G205700/TraesCS5B02G155600	6	BP
GO:0044030	regulation of DNA methylation	3/3745	32/107890	0.0984881	0.562871	0.528241	TraesCS4A02G372200/TraesCS7D02G069700/TraesCS7A02G074600	3	BP
GO:0006743	ubiquinone metabolic process	8/3745	135/107890	0.0988377	0.562871	0.528241	TraesCS7A02G235000/TraesCS6D02G202500/TraesCS6D02G239700/TraesCS2A02G523400/TraesCS6B02G430100/TraesCS2D02G525500/TraesCS6B02G333600/TraesCS2B02G553300	8	BP
GO:0043009	chordate embryonic development	7/3745	113/107890	0.0989422	0.562871	0.528241	TraesCS6D02G315400/TraesCS4B02G109300/TraesCS6B02G405200/TraesCS6B02G470000/TraesCS6B02G350800/TraesCS6B02G366400/TraesCS4D02G126400	7	BP
GO:0009910	negative regulation of flower development	9/3745	158/107890	0.10041	0.562871	0.528241	TraesCS6D02G293200/TraesCS7D02G176700/TraesCS4D02G145700/TraesCS6A02G309600/TraesCS6B02G350800/TraesCS5B02G153300/TraesCS6B02G343900/TraesCS3D02G161800/TraesCS4A02G409200	9	BP
GO:0023061	signal release	4/3745	51/107890	0.100475	0.562871	0.528241	TraesCS1A02G089300/TraesCS1B02G252100/TraesCS6B02G344100/TraesCS6B02G229000	4	BP
GO:0042724	thiamine-containing compound biosynthetic process	4/3745	51/107890	0.100475	0.562871	0.528241	TraesCS7A02G286300/TraesCS1B02G245400/TraesCS1B02G255100/TraesCS1B02G266500	4	BP
GO:0045834	positive regulation of lipid metabolic process	4/3745	51/107890	0.100475	0.562871	0.528241	TraesCS4B02G095400/TraesCS3A02G289900/TraesCS3D02G289600/TraesCS3B02G324500	4	BP
GO:0042110	T cell activation	5/3745	71/107890	0.100488	0.562871	0.528241	TraesCS6D02G270300/TraesCS4B02G071600/TraesCS2D02G480300/TraesCS6B02G344100/TraesCS4D02G091500	5	BP
GO:0070897	transcription preinitiation complex assembly	5/3745	71/107890	0.100488	0.562871	0.528241	TraesCS6D02G309500/TraesCS7A02G262100/TraesCS6B02G376500/TraesCS6B02G341600/TraesCS6B02G361300	5	BP
GO:0001933	negative regulation of protein phosphorylation	17/3745	348/107890	0.101453	0.562871	0.528241	TraesCS6D02G336200/TraesCS6D02G263500/TraesCS6D02G301100/TraesCS6A02G037000/TraesCSU02G125400/TraesCS5A02G552500/TraesCS1B02G243500/TraesCS4B02G388100/TraesCS7B02G027500/TraesCS3B02G573800/TraesCS3D02G513300/TraesCS6B02G235500/TraesCS6B02G352100/TraesCS6B02G345300/TraesCS5B02G159300/TraesCS6B02G386600/TraesCS5D02G247100	17	BP
GO:0042692	muscle cell differentiation	8/3745	136/107890	0.102007	0.562871	0.528241	TraesCS6D02G270300/TraesCS7A02G262700/TraesCS7A02G275500/TraesCS2D02G480300/TraesCS5B02G156800/TraesCS4D02G126400/TraesCS6B02G452800/TraesCS3D02G166900	8	BP
GO:0000082	G1/S transition of mitotic cell cycle	7/3745	114/107890	0.102442	0.562871	0.528241	TraesCS6D02G195300/TraesCS6D02G315400/TraesCS6D02G305800/TraesCS7A02G248700/TraesCS7A02G213600/TraesCS6B02G366400/TraesCS6B02G356400	7	BP
GO:0040010	positive regulation of growth rate	7/3745	114/107890	0.102442	0.562871	0.528241	TraesCS6D02G253600/TraesCS6D02G190000/TraesCS6D02G192000/TraesCS3D02G163900/TraesCS6B02G225700/TraesCS6B02G239500/TraesCS7B02G262100	7	BP
GO:0042793	plastid transcription	12/3745	229/107890	0.104215	0.562871	0.528241	TraesCS6D02G183600/TraesCS6D02G202300/TraesCS6D02G204200/TraesCS6D02G325000/TraesCS6B02G010000/TraesCS1B02G254000/TraesCS1B02G255100/TraesCS1B02G265700/TraesCS6B02G233800/TraesCS6B02G349300/TraesCS6B02G376100/TraesCS6B02G344700	12	BP
GO:0000718	nucleotide-excision repair, DNA damage removal	2/3745	16/107890	0.104844	0.562871	0.528241	TraesCS6D02G315400/TraesCS6B02G366400	2	BP
GO:0010031	circumnutation	2/3745	16/107890	0.104844	0.562871	0.528241	TraesCS6D02G290800/TraesCS6B02G341700	2	BP
GO:0043392	negative regulation of DNA binding	2/3745	16/107890	0.104844	0.562871	0.528241	TraesCS6D02G276500/TraesCS1A02G289300	2	BP
GO:0044349	DNA excision	2/3745	16/107890	0.104844	0.562871	0.528241	TraesCS6D02G315400/TraesCS6B02G366400	2	BP
GO:0045898	regulation of RNA polymerase II transcription preinitiation complex assembly	2/3745	16/107890	0.104844	0.562871	0.528241	TraesCS6B02G376500/TraesCS6B02G341600	2	BP
GO:0045899	positive regulation of RNA polymerase II transcription preinitiation complex assembly	2/3745	16/107890	0.104844	0.562871	0.528241	TraesCS6B02G376500/TraesCS6B02G341600	2	BP
GO:0051100	negative regulation of binding	2/3745	16/107890	0.104844	0.562871	0.528241	TraesCS6D02G276500/TraesCS1A02G289300	2	BP
GO:0080141	regulation of jasmonic acid biosynthetic process	2/3745	16/107890	0.104844	0.562871	0.528241	TraesCS6D02G358000/TraesCS6B02G411500	2	BP
GO:2000023	regulation of lateral root development	2/3745	16/107890	0.104844	0.562871	0.528241	TraesCS6D02G216400/TraesCS1B02G275600	2	BP
GO:0018196	peptidyl-asparagine modification	6/3745	93/107890	0.104904	0.562871	0.528241	TraesCS6D02G250200/TraesCS7A02G415500/TraesCS4B02G173000/TraesCS4D02G126400/TraesCS6B02G339600/TraesCS6B02G393900	6	BP
GO:0018279	protein N-linked glycosylation via asparagine	6/3745	93/107890	0.104904	0.562871	0.528241	TraesCS6D02G250200/TraesCS7A02G415500/TraesCS4B02G173000/TraesCS4D02G126400/TraesCS6B02G339600/TraesCS6B02G393900	6	BP
GO:0019430	removal of superoxide radicals	6/3745	93/107890	0.104904	0.562871	0.528241	TraesCS6D02G320800/TraesCS6D02G258600/TraesCS7A02G225400/TraesCS6B02G371500/TraesCS6B02G344900/TraesCS6B02G237400	6	BP
GO:0071450	cellular response to oxygen radical	6/3745	93/107890	0.104904	0.562871	0.528241	TraesCS6D02G320800/TraesCS6D02G258600/TraesCS7A02G225400/TraesCS6B02G371500/TraesCS6B02G344900/TraesCS6B02G237400	6	BP
GO:0071451	cellular response to superoxide	6/3745	93/107890	0.104904	0.562871	0.528241	TraesCS6D02G320800/TraesCS6D02G258600/TraesCS7A02G225400/TraesCS6B02G371500/TraesCS6B02G344900/TraesCS6B02G237400	6	BP
GO:0062013	positive regulation of small molecule metabolic process	5/3745	72/107890	0.105078	0.562871	0.528241	TraesCS6D02G251700/TraesCS4B02G095400/TraesCS3A02G289900/TraesCS3D02G289600/TraesCS3B02G324500	5	BP
GO:0035065	regulation of histone acetylation	3/3745	33/107890	0.105676	0.562871	0.528241	TraesCS4A02G372200/TraesCS7D02G069700/TraesCS7A02G074600	3	BP
GO:0048066	developmental pigmentation	3/3745	33/107890	0.105676	0.562871	0.528241	TraesCS1B02G252100/TraesCS6B02G387300/TraesCS4D02G126400	3	BP
GO:0098755	maintenance of seed dormancy by absisic acid	3/3745	33/107890	0.105676	0.562871	0.528241	TraesCS6D02G216600/TraesCS5B02G244000/TraesCS5D02G253400	3	BP
GO:1901983	regulation of protein acetylation	3/3745	33/107890	0.105676	0.562871	0.528241	TraesCS4A02G372200/TraesCS7D02G069700/TraesCS7A02G074600	3	BP
GO:2000142	regulation of DNA-templated transcription, initiation	3/3745	33/107890	0.105676	0.562871	0.528241	TraesCS4B02G109300/TraesCS6B02G376500/TraesCS6B02G341600	3	BP
GO:2000756	regulation of peptidyl-lysine acetylation	3/3745	33/107890	0.105676	0.562871	0.528241	TraesCS4A02G372200/TraesCS7D02G069700/TraesCS7A02G074600	3	BP
GO:0006488	dolichol-linked oligosaccharide biosynthetic process	4/3745	52/107890	0.10602	0.562871	0.528241	TraesCS6D02G250200/TraesCS4B02G173000/TraesCS4D02G126400/TraesCS6B02G409700	4	BP
GO:0010358	leaf shaping	4/3745	52/107890	0.10602	0.562871	0.528241	TraesCS6B02G337300/TraesCS7B02G175400/TraesCS4B02G117100/TraesCS4D02G235200	4	BP
GO:0031023	microtubule organizing center organization	4/3745	52/107890	0.10602	0.562871	0.528241	TraesCS7A02G278700/TraesCS6D02G241100/TraesCS5B02G156500/TraesCS7B02G176600	4	BP
GO:0070972	protein localization to endoplasmic reticulum	9/3745	160/107890	0.106336	0.563407	0.528744	TraesCS7A02G255400/TraesCS7A02G271400/TraesCS7A02G221600/TraesCS7A02G244100/TraesCS6B02G417700/TraesCS4B02G117900/TraesCS3A02G207800/TraesCS4B02G117800/TraesCS4A02G066100	9	BP
GO:0140014	mitotic nuclear division	20/3745	425/107890	0.107087	0.566248	0.53141	TraesCS7A02G278700/TraesCS6D02G191700/TraesCS6D02G233200/TraesCS6D02G207900/TraesCS7A02G234900/TraesCS6D02G327000/TraesCS6D02G354500/TraesCS7D02G057500/TraesCS7A02G155100/TraesCS1B02G244100/TraesCS4B02G308700/TraesCS1A02G246000/TraesCS6A02G309600/TraesCS6B02G341400/TraesCS5B02G156500/TraesCS7B02G176600/TraesCS6B02G236700/TraesCS6B02G377000/TraesCS3D02G120200/TraesCS6B02G407600	20	BP
GO:0010093	specification of floral organ identity	8/3745	138/107890	0.108513	0.572635	0.537405	TraesCS6D02G240200/TraesCS7A02G260600/TraesCS6D02G220400/TraesCS3A02G434900/TraesCS1B02G275000/TraesCS2B02G300500/TraesCS7B02G235800/TraesCS7A02G413700	8	BP
GO:0031540	regulation of anthocyanin biosynthetic process	6/3745	94/107890	0.108962	0.573843	0.538538	TraesCS4B02G236700/TraesCS6D02G212700/TraesCS2B02G300500/TraesCS7A02G093900/TraesCS6B02G366900/TraesCS2B02G558400	6	BP
GO:0007584	response to nutrient	12/3745	231/107890	0.109179	0.573843	0.538538	TraesCS6D02G294500/TraesCS7A02G259700/TraesCS6D02G187200/TraesCS6D02G211700/TraesCS6D02G311300/TraesCS6D02G192000/TraesCS6D02G294800/TraesCS7B02G009900/TraesCS6B02G432600/TraesCS6B02G345700/TraesCS6B02G224100/TraesCS6B02G362800	12	BP
GO:0044843	cell cycle G1/S phase transition	7/3745	116/107890	0.109639	0.575111	0.539728	TraesCS6D02G195300/TraesCS6D02G315400/TraesCS6D02G305800/TraesCS7A02G248700/TraesCS7A02G213600/TraesCS6B02G366400/TraesCS6B02G356400	7	BP
GO:0006551	leucine metabolic process	4/3745	53/107890	0.111701	0.575823	0.540397	TraesCS6D02G201500/TraesCS6D02G393200/TraesCS6D02G225800/TraesCS6B02G455600	4	BP
GO:0019363	pyridine nucleotide biosynthetic process	4/3745	53/107890	0.111701	0.575823	0.540397	TraesCS7A02G278400/TraesCS6D02G370600/TraesCS1B02G253900/TraesCS7B02G175800	4	BP
GO:0016572	histone phosphorylation	12/3745	232/107890	0.111711	0.575823	0.540397	TraesCS6D02G235400/TraesCS7A02G215000/TraesCS7A02G248700/TraesCS6D02G246700/TraesCS6D02G196000/TraesCS4A02G372200/TraesCS7D02G069700/TraesCS7A02G074600/TraesCS6B02G447600/TraesCS6B02G419000/TraesCS6B02G350800/TraesCS6B02G356900	12	BP
GO:0090701	specification of plant organ identity	8/3745	139/107890	0.11185	0.575823	0.540397	TraesCS6D02G240200/TraesCS7A02G260600/TraesCS6D02G220400/TraesCS3A02G434900/TraesCS1B02G275000/TraesCS2B02G300500/TraesCS7B02G235800/TraesCS7A02G413700	8	BP
GO:0071248	cellular response to metal ion	10/3745	185/107890	0.112	0.575823	0.540397	TraesCS6D02G301000/TraesCS6D02G271900/TraesCS3D02G164500/TraesCS6B02G352000/TraesCS4B02G175100/TraesCS2D02G033200/TraesCS2B02G047400/TraesCS2A02G033700/TraesCS6B02G351800/TraesCS2A02G396400	10	BP
GO:0006977	DNA damage response, signal transduction by p53 class mediator resulting in cell cycle arrest	3/3745	34/107890	0.113061	0.575823	0.540397	TraesCS6D02G195300/TraesCS6D02G305800/TraesCS6B02G356400	3	BP
GO:0007411	axon guidance	3/3745	34/107890	0.113061	0.575823	0.540397	TraesCS5B02G159100/TraesCS6B02G377200/TraesCS4D02G305100	3	BP
GO:0072395	signal transduction involved in cell cycle checkpoint	3/3745	34/107890	0.113061	0.575823	0.540397	TraesCS6D02G195300/TraesCS6D02G305800/TraesCS6B02G356400	3	BP
GO:0072401	signal transduction involved in DNA integrity checkpoint	3/3745	34/107890	0.113061	0.575823	0.540397	TraesCS6D02G195300/TraesCS6D02G305800/TraesCS6B02G356400	3	BP
GO:0072413	signal transduction involved in mitotic cell cycle checkpoint	3/3745	34/107890	0.113061	0.575823	0.540397	TraesCS6D02G195300/TraesCS6D02G305800/TraesCS6B02G356400	3	BP
GO:0072422	signal transduction involved in DNA damage checkpoint	3/3745	34/107890	0.113061	0.575823	0.540397	TraesCS6D02G195300/TraesCS6D02G305800/TraesCS6B02G356400	3	BP
GO:0072431	signal transduction involved in mitotic G1 DNA damage checkpoint	3/3745	34/107890	0.113061	0.575823	0.540397	TraesCS6D02G195300/TraesCS6D02G305800/TraesCS6B02G356400	3	BP
GO:1902400	intracellular signal transduction involved in G1 DNA damage checkpoint	3/3745	34/107890	0.113061	0.575823	0.540397	TraesCS6D02G195300/TraesCS6D02G305800/TraesCS6B02G356400	3	BP
GO:1902402	signal transduction involved in mitotic DNA damage checkpoint	3/3745	34/107890	0.113061	0.575823	0.540397	TraesCS6D02G195300/TraesCS6D02G305800/TraesCS6B02G356400	3	BP
GO:1902403	signal transduction involved in mitotic DNA integrity checkpoint	3/3745	34/107890	0.113061	0.575823	0.540397	TraesCS6D02G195300/TraesCS6D02G305800/TraesCS6B02G356400	3	BP
GO:0010417	glucuronoxylan biosynthetic process	5/3745	74/107890	0.11456	0.577247	0.541733	TraesCS1B02G277500/TraesCS3B02G082700/TraesCS3A02G440800/TraesCS3D02G433400/TraesCS3B02G474900	5	BP
GO:0006099	tricarboxylic acid cycle	9/3745	163/107890	0.115584	0.577247	0.541733	TraesCS6D02G183200/TraesCS6D02G192900/TraesCS7A02G263400/TraesCS7A02G219100/TraesCS5B02G322200/TraesCS2B02G244600/TraesCS6B02G440200/TraesCS6B02G235000/TraesCS6B02G238500	9	BP
GO:0000022	mitotic spindle elongation	2/3745	17/107890	0.116192	0.577247	0.541733	TraesCS7A02G278700/TraesCS7B02G176600	2	BP
GO:0006103	2-oxoglutarate metabolic process	2/3745	17/107890	0.116192	0.577247	0.541733	TraesCS6D02G344200/TraesCS6B02G393600	2	BP
GO:0031120	snRNA pseudouridine synthesis	2/3745	17/107890	0.116192	0.577247	0.541733	TraesCS6D02G269300/TraesCS6D02G204400	2	BP
GO:0040031	snRNA modification	2/3745	17/107890	0.116192	0.577247	0.541733	TraesCS6D02G269300/TraesCS6D02G204400	2	BP
GO:0042461	photoreceptor cell development	2/3745	17/107890	0.116192	0.577247	0.541733	TraesCS6B02G377200/TraesCS4D02G305100	2	BP
GO:0042462	eye photoreceptor cell development	2/3745	17/107890	0.116192	0.577247	0.541733	TraesCS6B02G377200/TraesCS4D02G305100	2	BP
GO:0045040	protein insertion into mitochondrial outer membrane	2/3745	17/107890	0.116192	0.577247	0.541733	TraesCS7A02G282000/TraesCS1B02G199200	2	BP
GO:0080140	regulation of jasmonic acid metabolic process	2/3745	17/107890	0.116192	0.577247	0.541733	TraesCS6D02G358000/TraesCS6B02G411500	2	BP
GO:0097428	protein maturation by iron-sulfur cluster transfer	2/3745	17/107890	0.116192	0.577247	0.541733	TraesCS7A02G213900/TraesCS6B02G224200	2	BP
GO:0006275	regulation of DNA replication	20/3745	430/107890	0.116305	0.577247	0.541733	TraesCS7A02G279000/TraesCS6D02G233200/TraesCS6D02G357600/TraesCS6D02G196000/TraesCS6D02G291000/TraesCS6D02G214400/TraesCS6D02G354500/TraesCS6D02G208400/TraesCS1B02G274600/TraesCS3B02G289300/TraesCS6B02G344300/TraesCS6B02G419000/TraesCS6B02G341400/TraesCS3D02G165900/TraesCS6B02G356900/TraesCS6B02G393100/TraesCS6B02G341900/TraesCS6B02G411100/TraesCS6B02G462700/TraesCS6B02G407600	20	BP
GO:0019827	stem cell population maintenance	16/3745	331/107890	0.116795	0.577247	0.541733	TraesCS7A02G260600/TraesCS6D02G293200/TraesCS1A02G199900/TraesCS3A02G432900/TraesCS3D02G427900/TraesCS3A02G434900/TraesCS2B02G300500/TraesCS7D02G261900/TraesCS5D02G454200/TraesCS2D02G442200/TraesCS3D02G428000/TraesCS7B02G158900/TraesCS7D02G176700/TraesCS6B02G350800/TraesCS6B02G343900/TraesCS6B02G466700	16	BP
GO:0098727	maintenance of cell number	16/3745	331/107890	0.116795	0.577247	0.541733	TraesCS7A02G260600/TraesCS6D02G293200/TraesCS1A02G199900/TraesCS3A02G432900/TraesCS3D02G427900/TraesCS3A02G434900/TraesCS2B02G300500/TraesCS7D02G261900/TraesCS5D02G454200/TraesCS2D02G442200/TraesCS3D02G428000/TraesCS7B02G158900/TraesCS7D02G176700/TraesCS6B02G350800/TraesCS6B02G343900/TraesCS6B02G466700	16	BP
GO:0010193	response to ozone	13/3745	258/107890	0.116884	0.577247	0.541733	TraesCS6D02G181000/TraesCS7A02G241800/TraesCS6D02G235500/TraesCS3A02G218000/TraesCS6B02G229600/TraesCS3B02G248500/TraesCS3D02G234300/TraesCS7B02G292700/TraesCS3D02G165700/TraesCS7D02G386600/TraesCS4D02G121300/TraesCS3A02G492600/TraesCS3D02G499700	13	BP
GO:0040009	regulation of growth rate	7/3745	118/107890	0.117097	0.577247	0.541733	TraesCS6D02G253600/TraesCS6D02G190000/TraesCS6D02G192000/TraesCS3D02G163900/TraesCS6B02G225700/TraesCS6B02G239500/TraesCS7B02G262100	7	BP
GO:0046356	acetyl-CoA catabolic process	7/3745	118/107890	0.117097	0.577247	0.541733	TraesCS6D02G183200/TraesCS6D02G192900/TraesCS7A02G219100/TraesCS2B02G244600/TraesCS6B02G440200/TraesCS6B02G235000/TraesCS6B02G238500	7	BP
GO:0009649	entrainment of circadian clock	4/3745	54/107890	0.117514	0.577247	0.541733	TraesCS7A02G284800/TraesCS6D02G305800/TraesCS6A02G177000/TraesCS6B02G356400	4	BP
GO:0098781	ncRNA transcription	4/3745	54/107890	0.117514	0.577247	0.541733	TraesCS6D02G213900/TraesCS6D02G325000/TraesCS1B02G265700/TraesCS6B02G376100	4	BP
GO:0006469	negative regulation of protein kinase activity	16/3745	332/107890	0.118983	0.581822	0.546026	TraesCS6D02G336200/TraesCS6D02G263500/TraesCS6D02G301100/TraesCS6A02G037000/TraesCSU02G125400/TraesCS5A02G552500/TraesCS1B02G243500/TraesCS4B02G388100/TraesCS7B02G027500/TraesCS3B02G573800/TraesCS3D02G513300/TraesCS6B02G352100/TraesCS6B02G345300/TraesCS5B02G159300/TraesCS6B02G386600/TraesCS5D02G247100	16	BP
GO:0010189	vitamin E biosynthetic process	5/3745	75/107890	0.119449	0.581822	0.546026	TraesCS6D02G286900/TraesCS6D02G245200/TraesCS6D02G219600/TraesCS6B02G336300/TraesCS6B02G369300	5	BP
GO:1902930	regulation of alcohol biosynthetic process	5/3745	75/107890	0.119449	0.581822	0.546026	TraesCS2B02G106500/TraesCS4B02G095400/TraesCS3A02G289900/TraesCS3D02G289600/TraesCS3B02G324500	5	BP
GO:0001894	tissue homeostasis	3/3745	35/107890	0.120636	0.581822	0.546026	TraesCS6D02G315400/TraesCS4B02G358500/TraesCS6B02G366400	3	BP
GO:0007098	centrosome cycle	3/3745	35/107890	0.120636	0.581822	0.546026	TraesCS7A02G278700/TraesCS5B02G156500/TraesCS7B02G176600	3	BP
GO:0046209	nitric oxide metabolic process	3/3745	35/107890	0.120636	0.581822	0.546026	TraesCS6D02G020700/TraesCS6B02G356800/TraesCS6A02G326200	3	BP
GO:0090691	formation of plant organ boundary	3/3745	35/107890	0.120636	0.581822	0.546026	TraesCS3A02G140700/TraesCS4A02G067300/TraesCS4D02G225200	3	BP
GO:0007052	mitotic spindle organization	7/3745	119/107890	0.120922	0.581822	0.546026	TraesCS7A02G278700/TraesCS1A02G246000/TraesCS5B02G156500/TraesCS7B02G176600/TraesCS5D02G184300/TraesCS5A02G179700/TraesCS5B02G177500	7	BP
GO:0033673	negative regulation of kinase activity	16/3745	333/107890	0.121195	0.581822	0.546026	TraesCS6D02G336200/TraesCS6D02G263500/TraesCS6D02G301100/TraesCS6A02G037000/TraesCSU02G125400/TraesCS5A02G552500/TraesCS1B02G243500/TraesCS4B02G388100/TraesCS7B02G027500/TraesCS3B02G573800/TraesCS3D02G513300/TraesCS6B02G352100/TraesCS6B02G345300/TraesCS5B02G159300/TraesCS6B02G386600/TraesCS5D02G247100	16	BP
GO:0080156	mitochondrial mRNA modification	14/3745	284/107890	0.121229	0.581822	0.546026	TraesCS7A02G262500/TraesCS7A02G264900/TraesCS7A02G253800/TraesCS6D02G306500/TraesCS7A02G231100/TraesCS6D02G242600/TraesCS7A02G247500/TraesCS6D02G307000/TraesCS6B02G010000/TraesCS6D02G378800/TraesCS6D02G208300/TraesCS6B02G344700/TraesCS6B02G433400/TraesCS4B02G120700	14	BP
GO:0006614	SRP-dependent cotranslational protein targeting to membrane	6/3745	97/107890	0.121608	0.581822	0.546026	TraesCS7A02G255400/TraesCS7A02G221600/TraesCS4B02G117900/TraesCS3A02G207800/TraesCS4B02G117800/TraesCS4A02G066100	6	BP
GO:0010337	regulation of salicylic acid metabolic process	6/3745	97/107890	0.121608	0.581822	0.546026	TraesCS6D02G179200/TraesCS6B02G234200/TraesCS5B02G153300/TraesCS4B02G120800/TraesCS6D02G080500/TraesCS6A02G091700	6	BP
GO:0007169	transmembrane receptor protein tyrosine kinase signaling pathway	17/3745	358/107890	0.121806	0.581822	0.546026	TraesCS7A02G245400/TraesCS6D02G336200/TraesCS2D02G218400/TraesCS1B02G252400/TraesCS4B02G095400/TraesCS5B02G047900/TraesCS7A02G226900/TraesCS1B02G266200/TraesCS7A02G419900/TraesCS5D02G285700/TraesCS5A02G278800/TraesCS7B02G260600/TraesCS5B02G278100/TraesCS6B02G386600/TraesCS7A02G191700/TraesCS4B02G173100/TraesCS6B02G336800	17	BP
GO:0009688	abscisic acid biosynthetic process	9/3745	165/107890	0.121988	0.581822	0.546026	TraesCS7A02G256900/TraesCS2B02G106500/TraesCS4B02G095400/TraesCS5B02G375900/TraesCS3A02G289900/TraesCS3D02G289600/TraesCS3B02G324500/TraesCS3D02G166900/TraesCS3A02G210800	9	BP
GO:0043289	apocarotenoid biosynthetic process	9/3745	165/107890	0.121988	0.581822	0.546026	TraesCS7A02G256900/TraesCS2B02G106500/TraesCS4B02G095400/TraesCS5B02G375900/TraesCS3A02G289900/TraesCS3D02G289600/TraesCS3B02G324500/TraesCS3D02G166900/TraesCS3A02G210800	9	BP
GO:1902645	tertiary alcohol biosynthetic process	9/3745	165/107890	0.121988	0.581822	0.546026	TraesCS7A02G256900/TraesCS2B02G106500/TraesCS4B02G095400/TraesCS5B02G375900/TraesCS3A02G289900/TraesCS3D02G289600/TraesCS3B02G324500/TraesCS3D02G166900/TraesCS3A02G210800	9	BP
GO:0006406	mRNA export from nucleus	15/3745	309/107890	0.122545	0.582366	0.546536	TraesCS6D02G311700/TraesCS6D02G213600/TraesCS6D02G341300/TraesCS6D02G266800/TraesCS6B02G083500/TraesCS1B02G266900/TraesCS1B02G270700/TraesCS1B02G063400/TraesCS6B02G373300/TraesCS6B02G456000/TraesCS6A02G309600/TraesCS6B02G337900/TraesCS6B02G391200/TraesCS6B02G363200/TraesCS6B02G239100	15	BP
GO:0071427	mRNA-containing ribonucleoprotein complex export from nucleus	15/3745	309/107890	0.122545	0.582366	0.546536	TraesCS6D02G311700/TraesCS6D02G213600/TraesCS6D02G341300/TraesCS6D02G266800/TraesCS6B02G083500/TraesCS1B02G266900/TraesCS1B02G270700/TraesCS1B02G063400/TraesCS6B02G373300/TraesCS6B02G456000/TraesCS6A02G309600/TraesCS6B02G337900/TraesCS6B02G391200/TraesCS6B02G363200/TraesCS6B02G239100	15	BP
GO:0010264	myo-inositol hexakisphosphate biosynthetic process	10/3745	189/107890	0.12387	0.582552	0.546711	TraesCS6D02G199200/TraesCS6D02G287000/TraesCS6D02G379900/TraesCS6B02G246500/TraesCS6A02G216400/TraesCS7B02G093800/TraesCS1B02G274000/TraesCS1B02G278600/TraesCS6B02G336400/TraesCS6B02G434400	10	BP
GO:0033517	myo-inositol hexakisphosphate metabolic process	10/3745	189/107890	0.12387	0.582552	0.546711	TraesCS6D02G199200/TraesCS6D02G287000/TraesCS6D02G379900/TraesCS6B02G246500/TraesCS6A02G216400/TraesCS7B02G093800/TraesCS1B02G274000/TraesCS1B02G278600/TraesCS6B02G336400/TraesCS6B02G434400	10	BP
GO:0000075	cell cycle checkpoint	17/3745	359/107890	0.123965	0.582552	0.546711	TraesCS6D02G195300/TraesCS6D02G191700/TraesCS6D02G315400/TraesCS6D02G305800/TraesCS7A02G214200/TraesCS6D02G302200/TraesCS7A02G213600/TraesCS6D02G233200/TraesCS6D02G327000/TraesCS2D02G480300/TraesCS6A02G309600/TraesCS6B02G366400/TraesCS6B02G334400/TraesCS6B02G356400/TraesCS6B02G353100/TraesCS6B02G236700/TraesCS7B02G115400	17	BP
GO:0009073	aromatic amino acid family biosynthetic process	18/3745	384/107890	0.12421	0.582552	0.546711	TraesCS6D02G337500/TraesCS6D02G252200/TraesCS6D02G255300/TraesCS6D02G202300/TraesCS6D02G275700/TraesCS6D02G239700/TraesCS6D02G227700/TraesCS4A02G140700/TraesCS1B02G254000/TraesCS1B02G266500/TraesCS1B02G261600/TraesCS6B02G388100/TraesCS2A02G523400/TraesCS7B02G176100/TraesCS2D02G525500/TraesCS6B02G333600/TraesCS6B02G447700/TraesCS2B02G553300	18	BP
GO:0006714	sesquiterpenoid metabolic process	12/3745	237/107890	0.12488	0.582552	0.546711	TraesCS7A02G256900/TraesCS2B02G106500/TraesCS4B02G095400/TraesCS5B02G375900/TraesCS6A02G271300/TraesCS3A02G289900/TraesCS3D02G289600/TraesCS4B02G151300/TraesCS6B02G298500/TraesCS3B02G324500/TraesCS3D02G166900/TraesCS3A02G210800	12	BP
GO:0052546	cell wall pectin metabolic process	12/3745	237/107890	0.12488	0.582552	0.546711	TraesCS5B02G051300/TraesCS7A02G264200/TraesCS1B02G253400/TraesCS5D02G404300/TraesCS6B02G348700/TraesCS5D02G230300/TraesCS5A02G222500/TraesCS6B02G226700/TraesCS5B02G155400/TraesCS5B02G221600/TraesCS5B02G155600/TraesCS7B02G271600	12	BP
GO:0006298	mismatch repair	6/3745	98/107890	0.125978	0.582552	0.546711	TraesCS7A02G214200/TraesCS6D02G302200/TraesCS6D02G357600/TraesCS1B02G328200/TraesCS6B02G235900/TraesCS6B02G235600	6	BP
GO:0009690	cytokinin metabolic process	22/3745	486/107890	0.126874	0.582552	0.546711	TraesCS6D02G195800/TraesCS1A02G156100/TraesCS6D02G257300/TraesCS6D02G239100/TraesCS6D02G057900/TraesCS6D02G294700/TraesCS2B02G066000/TraesCS1B02G328200/TraesCS7B02G009900/TraesCS1B02G247700/TraesCS1B02G239000/TraesCS6D02G243500/TraesCS6B02G334300/TraesCS6B02G413100/TraesCS6B02G235200/TraesCS6A02G189800/TraesCS6B02G227500/TraesCS5B02G248900/TraesCS4B02G261100/TraesCS2B02G039900/TraesCS5A02G250900/…	22	BP
GO:0032990	cell part morphogenesis	12/3745	238/107890	0.127614	0.582552	0.546711	TraesCS6D02G242400/TraesCS1D02G406300/TraesCS7A02G262700/TraesCS2D02G480300/TraesCS1B02G266200/TraesCS5B02G159100/TraesCS6B02G377200/TraesCS6B02G335200/TraesCS3D02G165500/TraesCS3D02G166900/TraesCS6B02G229900/TraesCS4D02G305100	12	BP
GO:0042126	nitrate metabolic process	12/3745	238/107890	0.127614	0.582552	0.546711	TraesCS7A02G259700/TraesCS6D02G260500/TraesCS1B02G267900/TraesCS6D02G020700/TraesCS6A02G298100/TraesCS7B02G113600/TraesCS5B02G153300/TraesCS3D02G166900/TraesCS5B02G414000/TraesCS7B02G262200/TraesCS6B02G356800/TraesCS6A02G326200	12	BP
GO:0042128	nitrate assimilation	12/3745	238/107890	0.127614	0.582552	0.546711	TraesCS7A02G259700/TraesCS6D02G260500/TraesCS1B02G267900/TraesCS6D02G020700/TraesCS6A02G298100/TraesCS7B02G113600/TraesCS5B02G153300/TraesCS3D02G166900/TraesCS5B02G414000/TraesCS7B02G262200/TraesCS6B02G356800/TraesCS6A02G326200	12	BP
GO:0015739	sialic acid transport	2/3745	18/107890	0.127831	0.582552	0.546711	TraesCS6D02G187100/TraesCS6B02G224000	2	BP
GO:0019305	dTDP-rhamnose biosynthetic process	2/3745	18/107890	0.127831	0.582552	0.546711	TraesCS2D02G111400/TraesCS2B02G129600	2	BP
GO:0032973	amino acid export across plasma membrane	2/3745	18/107890	0.127831	0.582552	0.546711	TraesCS4B02G081100/TraesCS6B02G360900	2	BP
GO:0045637	regulation of myeloid cell differentiation	2/3745	18/107890	0.127831	0.582552	0.546711	TraesCS4D02G145700/TraesCS6B02G350800	2	BP
GO:0046383	dTDP-rhamnose metabolic process	2/3745	18/107890	0.127831	0.582552	0.546711	TraesCS2D02G111400/TraesCS2B02G129600	2	BP
GO:0051101	regulation of DNA binding	2/3745	18/107890	0.127831	0.582552	0.546711	TraesCS6D02G276500/TraesCS1A02G289300	2	BP
GO:0072489	methylammonium transmembrane transport	2/3745	18/107890	0.127831	0.582552	0.546711	TraesCS4B02G349500/TraesCS3D02G163400	2	BP
GO:1901031	regulation of response to reactive oxygen species	2/3745	18/107890	0.127831	0.582552	0.546711	TraesCS6D02G320800/TraesCS6B02G371500	2	BP
GO:2000121	regulation of removal of superoxide radicals	2/3745	18/107890	0.127831	0.582552	0.546711	TraesCS6D02G320800/TraesCS6B02G371500	2	BP
GO:0001523	retinoid metabolic process	3/3745	36/107890	0.128392	0.582552	0.546711	TraesCS4D02G351800/TraesCS4B02G358500/TraesCS6B02G425700	3	BP
GO:0042335	cuticle development	18/3745	386/107890	0.128447	0.582552	0.546711	TraesCS6D02G237000/TraesCS6D02G181700/TraesCS6D02G274600/TraesCS2D02G218400/TraesCS1B02G272100/TraesCS1B02G249700/TraesCS1B02G273500/TraesCS6B02G423900/TraesCS6D02G166600/TraesCS6B02G207000/TraesCS6B02G241000/TraesCS6B02G238600/TraesCS6B02G230200/TraesCS3D02G283300/TraesCS4B02G173000/TraesCS6B02G425900/TraesCS6B02G473900/TraesCS7B02G114200	18	BP
GO:0042360	vitamin E metabolic process	5/3745	77/107890	0.129514	0.582552	0.546711	TraesCS6D02G286900/TraesCS6D02G245200/TraesCS6D02G219600/TraesCS6B02G336300/TraesCS6B02G369300	5	BP
GO:0006490	oligosaccharide-lipid intermediate biosynthetic process	4/3745	56/107890	0.129522	0.582552	0.546711	TraesCS6D02G250200/TraesCS4B02G173000/TraesCS4D02G126400/TraesCS6B02G409700	4	BP
GO:0046417	chorismate metabolic process	4/3745	56/107890	0.129522	0.582552	0.546711	TraesCS2A02G523400/TraesCS2D02G525500/TraesCS6B02G333600/TraesCS2B02G553300	4	BP
GO:0048442	sepal development	15/3745	312/107890	0.129654	0.582552	0.546711	TraesCS7A02G245400/TraesCS7A02G260600/TraesCS6D02G304300/TraesCS6D02G212700/TraesCS6D02G356500/TraesCS6D02G208400/TraesCS3A02G434900/TraesCS1B02G252400/TraesCS6B02G354900/TraesCS6B02G333400/TraesCS7B02G175400/TraesCS6B02G233400/TraesCS6B02G410200/TraesCS4B02G118300/TraesCS5B02G158100	15	BP
GO:0048464	flower calyx development	15/3745	312/107890	0.129654	0.582552	0.546711	TraesCS7A02G245400/TraesCS7A02G260600/TraesCS6D02G304300/TraesCS6D02G212700/TraesCS6D02G356500/TraesCS6D02G208400/TraesCS3A02G434900/TraesCS1B02G252400/TraesCS6B02G354900/TraesCS6B02G333400/TraesCS7B02G175400/TraesCS6B02G233400/TraesCS6B02G410200/TraesCS4B02G118300/TraesCS5B02G158100	15	BP
GO:0033046	negative regulation of sister chromatid segregation	6/3745	99/107890	0.130422	0.582552	0.546711	TraesCS6D02G191700/TraesCS6D02G233200/TraesCS6D02G327000/TraesCS4B02G308700/TraesCS6A02G309600/TraesCS6B02G236700	6	BP
GO:0033048	negative regulation of mitotic sister chromatid segregation	6/3745	99/107890	0.130422	0.582552	0.546711	TraesCS6D02G191700/TraesCS6D02G233200/TraesCS6D02G327000/TraesCS4B02G308700/TraesCS6A02G309600/TraesCS6B02G236700	6	BP
GO:0045839	negative regulation of mitotic nuclear division	6/3745	99/107890	0.130422	0.582552	0.546711	TraesCS6D02G191700/TraesCS6D02G233200/TraesCS6D02G327000/TraesCS4B02G308700/TraesCS6A02G309600/TraesCS6B02G236700	6	BP
GO:0045841	negative regulation of mitotic metaphase/anaphase transition	6/3745	99/107890	0.130422	0.582552	0.546711	TraesCS6D02G191700/TraesCS6D02G233200/TraesCS6D02G327000/TraesCS4B02G308700/TraesCS6A02G309600/TraesCS6B02G236700	6	BP
GO:0051985	negative regulation of chromosome segregation	6/3745	99/107890	0.130422	0.582552	0.546711	TraesCS6D02G191700/TraesCS6D02G233200/TraesCS6D02G327000/TraesCS4B02G308700/TraesCS6A02G309600/TraesCS6B02G236700	6	BP
GO:1902100	negative regulation of metaphase/anaphase transition of cell cycle	6/3745	99/107890	0.130422	0.582552	0.546711	TraesCS6D02G191700/TraesCS6D02G233200/TraesCS6D02G327000/TraesCS4B02G308700/TraesCS6A02G309600/TraesCS6B02G236700	6	BP
GO:1905819	negative regulation of chromosome separation	6/3745	99/107890	0.130422	0.582552	0.546711	TraesCS6D02G191700/TraesCS6D02G233200/TraesCS6D02G327000/TraesCS4B02G308700/TraesCS6A02G309600/TraesCS6B02G236700	6	BP
GO:2000816	negative regulation of mitotic sister chromatid separation	6/3745	99/107890	0.130422	0.582552	0.546711	TraesCS6D02G191700/TraesCS6D02G233200/TraesCS6D02G327000/TraesCS4B02G308700/TraesCS6A02G309600/TraesCS6B02G236700	6	BP
GO:0009556	microsporogenesis	11/3745	215/107890	0.130564	0.582552	0.546711	TraesCS6D02G186900/TraesCS6D02G191600/TraesCS6D02G293200/TraesCS7B02G009900/TraesCS7D02G176700/TraesCS6B02G223700/TraesCS6B02G468200/TraesCS6B02G236600/TraesCS3D02G164600/TraesCS6B02G343900/TraesCS4D02G104300	11	BP
GO:0010214	seed coat development	9/3745	168/107890	0.131943	0.587705	0.551547	TraesCS7A02G211600/TraesCS6D02G319900/TraesCS6B02G369400/TraesCS1A02G033200/TraesCS4D02G112900/TraesCS6B02G370300/TraesCS4B02G115200/TraesCS1D02G034600/TraesCS2A02G132600	9	BP
GO:0016055	Wnt signaling pathway	8/3745	145/107890	0.13301	0.590349	0.554029	TraesCS6D02G379500/TraesCS4D02G351800/TraesCS4B02G358500/TraesCS7A02G226900/TraesCS4D02G145700/TraesCS7A02G419900/TraesCS6B02G350800/TraesCS4B02G348300	8	BP
GO:0198738	cell-cell signaling by wnt	8/3745	145/107890	0.13301	0.590349	0.554029	TraesCS6D02G379500/TraesCS4D02G351800/TraesCS4B02G358500/TraesCS7A02G226900/TraesCS4D02G145700/TraesCS7A02G419900/TraesCS6B02G350800/TraesCS4B02G348300	8	BP
GO:0051568	histone H3-K4 methylation	5/3745	78/107890	0.134687	0.590349	0.554029	TraesCS6D02G232000/TraesCS6D02G196000/TraesCS4D02G145700/TraesCS6B02G348300/TraesCS6B02G350800	5	BP
GO:0044786	cell cycle DNA replication	16/3745	339/107890	0.134969	0.590349	0.554029	TraesCS6D02G195300/TraesCS6D02G315400/TraesCS7A02G248700/TraesCS6D02G302200/TraesCS7A02G213600/TraesCS6D02G233200/TraesCS6D02G291000/TraesCS6D02G354500/TraesCS5D02G475400/TraesCS6B02G233700/TraesCS6B02G366400/TraesCS6B02G356900/TraesCS6B02G345300/TraesCS6B02G353100/TraesCS6B02G341900/TraesCS6B02G407600	16	BP
GO:0009452	7-methylguanosine RNA capping	4/3745	57/107890	0.135709	0.590349	0.554029	TraesCS6D02G203100/TraesCS6D02G274200/TraesCS4B02G116000/TraesCS4B02G115800	4	BP
GO:0036260	RNA capping	4/3745	57/107890	0.135709	0.590349	0.554029	TraesCS6D02G203100/TraesCS6D02G274200/TraesCS4B02G116000/TraesCS4B02G115800	4	BP
GO:0090481	pyrimidine nucleotide-sugar transmembrane transport	4/3745	57/107890	0.135709	0.590349	0.554029	TraesCS6D02G187100/TraesCS2A02G380500/TraesCS2D02G376800/TraesCS2B02G397500	4	BP
GO:0006914	autophagy	20/3745	440/107890	0.136143	0.590349	0.554029	TraesCS7A02G208300/TraesCS6D02G192100/TraesCS6D02G240800/TraesCS1B02G201100/TraesCS6D02G315600/TraesCS6D02G221200/TraesCS7A02G256900/TraesCS1B02G441400/TraesCS7B02G070300/TraesCS2D02G491500/TraesCS6B02G237600/TraesCS7B02G115500/TraesCS6B02G366600/TraesCS5A02G548000/TraesCS6B02G439800/TraesCS1D02G072900/TraesCS6B02G386200/TraesCS6B02G396200/TraesCS6B02G443700/TraesCS5B02G155700	20	BP
GO:0061919	process utilizing autophagic mechanism	20/3745	440/107890	0.136143	0.590349	0.554029	TraesCS7A02G208300/TraesCS6D02G192100/TraesCS6D02G240800/TraesCS1B02G201100/TraesCS6D02G315600/TraesCS6D02G221200/TraesCS7A02G256900/TraesCS1B02G441400/TraesCS7B02G070300/TraesCS2D02G491500/TraesCS6B02G237600/TraesCS7B02G115500/TraesCS6B02G366600/TraesCS5A02G548000/TraesCS6B02G439800/TraesCS1D02G072900/TraesCS6B02G386200/TraesCS6B02G396200/TraesCS6B02G443700/TraesCS5B02G155700	20	BP
GO:0006376	mRNA splice site selection	3/3745	37/107890	0.136318	0.590349	0.554029	TraesCS6D02G197000/TraesCS6D02G182200/TraesCS6B02G231100	3	BP
GO:0006491	N-glycan processing	3/3745	37/107890	0.136318	0.590349	0.554029	TraesCS6B02G470000/TraesCS4A02G118200/TraesCS4D02G187300	3	BP
GO:0019985	translesion synthesis	3/3745	37/107890	0.136318	0.590349	0.554029	TraesCS6D02G357600/TraesCS3B02G289300/TraesCS6B02G411100	3	BP
GO:0048592	eye morphogenesis	3/3745	37/107890	0.136318	0.590349	0.554029	TraesCS6B02G377200/TraesCS6B02G335200/TraesCS4D02G305100	3	BP
GO:1903313	positive regulation of mRNA metabolic process	3/3745	37/107890	0.136318	0.590349	0.554029	TraesCS7B02G114200/TraesCS3A02G232500/TraesCS3D02G220700	3	BP
GO:0032958	inositol phosphate biosynthetic process	10/3745	193/107890	0.136398	0.590349	0.554029	TraesCS6D02G199200/TraesCS6D02G287000/TraesCS6D02G379900/TraesCS6B02G246500/TraesCS6A02G216400/TraesCS7B02G093800/TraesCS1B02G274000/TraesCS1B02G278600/TraesCS6B02G336400/TraesCS6B02G434400	10	BP
GO:0045047	protein targeting to ER	7/3745	123/107890	0.136851	0.590349	0.554029	TraesCS7A02G255400/TraesCS7A02G221600/TraesCS7A02G244100/TraesCS4B02G117900/TraesCS3A02G207800/TraesCS4B02G117800/TraesCS4A02G066100	7	BP
GO:0072599	establishment of protein localization to endoplasmic reticulum	7/3745	123/107890	0.136851	0.590349	0.554029	TraesCS7A02G255400/TraesCS7A02G221600/TraesCS7A02G244100/TraesCS4B02G117900/TraesCS3A02G207800/TraesCS4B02G117800/TraesCS4A02G066100	7	BP
GO:0006597	spermine biosynthetic process	2/3745	19/107890	0.139726	0.590349	0.554029	TraesCS6D02G202500/TraesCS6D02G202400	2	BP
GO:0007008	outer mitochondrial membrane organization	2/3745	19/107890	0.139726	0.590349	0.554029	TraesCS7A02G282000/TraesCS1B02G199200	2	BP
GO:0007611	learning or memory	2/3745	19/107890	0.139726	0.590349	0.554029	TraesCS2D02G480300/TraesCS1B02G253700	2	BP
GO:0010481	epidermal cell division	2/3745	19/107890	0.139726	0.590349	0.554029	TraesCS5B02G244000/TraesCS5D02G253400	2	BP
GO:0010482	regulation of epidermal cell division	2/3745	19/107890	0.139726	0.590349	0.554029	TraesCS5B02G244000/TraesCS5D02G253400	2	BP
GO:0032944	regulation of mononuclear cell proliferation	2/3745	19/107890	0.139726	0.590349	0.554029	TraesCS2D02G480300/TraesCS4D02G091500	2	BP
GO:0043901	negative regulation of multi-organism process	2/3745	19/107890	0.139726	0.590349	0.554029	TraesCS6D02G196000/TraesCS5B02G153300	2	BP
GO:0051231	spindle elongation	2/3745	19/107890	0.139726	0.590349	0.554029	TraesCS7A02G278700/TraesCS7B02G176600	2	BP
GO:0051775	response to redox state	2/3745	19/107890	0.139726	0.590349	0.554029	TraesCS6B02G425700/TraesCS6B02G344100	2	BP
GO:0080040	positive regulation of cellular response to phosphate starvation	2/3745	19/107890	0.139726	0.590349	0.554029	TraesCS2A02G169600/TraesCS7B02G478000	2	BP
GO:0097193	intrinsic apoptotic signaling pathway	2/3745	19/107890	0.139726	0.590349	0.554029	TraesCS6D02G192000/TraesCS2A02G396400	2	BP
GO:0097194	execution phase of apoptosis	2/3745	19/107890	0.139726	0.590349	0.554029	TraesCS6D02G192000/TraesCS2A02G396400	2	BP
GO:0140255	regulation of cellular response to phosphate starvation	2/3745	19/107890	0.139726	0.590349	0.554029	TraesCS2A02G169600/TraesCS7B02G478000	2	BP
GO:0016236	macroautophagy	5/3745	79/107890	0.13995	0.590349	0.554029	TraesCS7A02G208300/TraesCS6D02G315600/TraesCS7B02G070300/TraesCS6B02G366600/TraesCS6B02G386200	5	BP
GO:0045292	mRNA cis splicing, via spliceosome	5/3745	79/107890	0.13995	0.590349	0.554029	TraesCS6D02G203100/TraesCS6D02G182200/TraesCS6D02G244900/TraesCS6B02G231100/TraesCS3A02G210800	5	BP
GO:0090503	RNA phosphodiester bond hydrolysis, exonucleolytic	5/3745	79/107890	0.13995	0.590349	0.554029	TraesCS6D02G206900/TraesCS6D02G386600/TraesCS6D02G318000/TraesCS6B02G231600/TraesCS6B02G391400	5	BP
GO:0034219	carbohydrate transmembrane transport	18/3745	392/107890	0.141658	0.595914	0.559252	TraesCS6D02G187100/TraesCS6D02G205100/TraesCS7A02G247300/TraesCS7A02G261100/TraesCS5D02G218300/TraesCS5B02G210000/TraesCS5A02G213700/TraesCS2B02G141000/TraesCS3A02G296400/TraesCS6D02G367300/TraesCS6D02G367400/TraesCSU02G013200/TraesCS6B02G456500/TraesCS6B02G224000/TraesCS6B02G421500/TraesCS5D02G046300/TraesCS6B02G421800/TraesCS2D02G319100	18	BP
GO:0015936	coenzyme A metabolic process	4/3745	58/107890	0.142013	0.595914	0.559252	TraesCS7A02G248800/TraesCS6D02G219600/TraesCS6D02G258300/TraesCS7A02G256900	4	BP
GO:1903706	regulation of hemopoiesis	4/3745	58/107890	0.142013	0.595914	0.559252	TraesCS4B02G071600/TraesCS2D02G480300/TraesCS4D02G145700/TraesCS6B02G350800	4	BP
GO:0000959	mitochondrial RNA metabolic process	16/3745	342/107890	0.142176	0.595914	0.559252	TraesCS7A02G262500/TraesCS6D02G206900/TraesCS7A02G264900/TraesCS7A02G253800/TraesCS6D02G306500/TraesCS7A02G231100/TraesCS6D02G242600/TraesCS7A02G247500/TraesCS6D02G307000/TraesCS6B02G010000/TraesCS6D02G378800/TraesCS6D02G208300/TraesCS3D02G163900/TraesCS6B02G344700/TraesCS6B02G433400/TraesCS4B02G120700	16	BP
GO:0006414	translational elongation	19/3745	418/107890	0.143273	0.599555	0.562669	TraesCS6D02G371300/TraesCS7A02G239600/TraesCS4D02G167600/TraesCS1B02G178700/TraesCS5A02G378500/TraesCS6B02G199300/TraesCS7A02G114000/TraesCS7D02G109300/TraesCS6B02G456000/TraesCS6B02G367200/TraesCS6B02G238600/TraesCS6B02G234000/TraesCS6B02G402400/TraesCS6B02G224800/TraesCS6B02G399800/TraesCS6B02G415800/TraesCS7A02G419100/TraesCS6B02G425800/TraesCS6B02G411200	19	BP
GO:0043247	telomere maintenance in response to DNA damage	8/3745	148/107890	0.144303	0.600478	0.563535	TraesCS6D02G315400/TraesCS6D02G196000/TraesCS1B02G328200/TraesCS6B02G333700/TraesCS6B02G366400/TraesCS6B02G356900/TraesCS6B02G399000/TraesCS6B02G351900	8	BP
GO:1905114	cell surface receptor signaling pathway involved in cell-cell signaling	8/3745	148/107890	0.144303	0.600478	0.563535	TraesCS6D02G379500/TraesCS4D02G351800/TraesCS4B02G358500/TraesCS7A02G226900/TraesCS4D02G145700/TraesCS7A02G419900/TraesCS6B02G350800/TraesCS4B02G348300	8	BP
GO:0009435	NAD biosynthetic process	3/3745	38/107890	0.144407	0.600478	0.563535	TraesCS7A02G278400/TraesCS6D02G370600/TraesCS7B02G175800	3	BP
GO:0030330	DNA damage response, signal transduction by p53 class mediator	3/3745	38/107890	0.144407	0.600478	0.563535	TraesCS6D02G195300/TraesCS6D02G305800/TraesCS6B02G356400	3	BP
GO:0009251	glucan catabolic process	10/3745	196/107890	0.146216	0.60416	0.56699	TraesCS3A02G366300/TraesCS4B02G104500/TraesCS7D02G201000/TraesCS4B02G173200/TraesCS6B02G342600/TraesCS6A02G122100/TraesCS6A02G312400/TraesCS7A02G197900/TraesCS7B02G104600/TraesCS6B02G150300	10	BP
GO:0031123	RNA 3'-end processing	14/3745	294/107890	0.146809	0.60416	0.56699	TraesCS6D02G384500/TraesCS2D02G342600/TraesCS6D02G266800/TraesCS6B02G083500/TraesCS4D02G167600/TraesCS1B02G254600/TraesCS2D02G480300/TraesCSU02G248500/TraesCS1A02G324600/TraesCS6D02G318000/TraesCS3D02G163900/TraesCS7B02G114200/TraesCS7D02G325500/TraesCS7B02G229300	14	BP
GO:0042255	ribosome assembly	14/3745	294/107890	0.146809	0.60416	0.56699	TraesCS6D02G246600/TraesCS6D02G207800/TraesCS4B02G108400/TraesCS6D02G190000/TraesCS6D02G196900/TraesCS6D02G283900/TraesCS1B02G265700/TraesCS5B02G152500/TraesCS6B02G225700/TraesCS6B02G225600/TraesCS6B02G234000/TraesCS6B02G239800/TraesCS4A02G158000/TraesCS6B02G333100	14	BP
GO:0006535	cysteine biosynthetic process from serine	4/3745	59/107890	0.148431	0.60416	0.56699	TraesCS3A02G287400/TraesCS3A02G209500/TraesCS5D02G396300/TraesCS5A02G386500	4	BP
GO:0043044	ATP-dependent chromatin remodeling	4/3745	59/107890	0.148431	0.60416	0.56699	TraesCS4A02G372200/TraesCS7D02G069700/TraesCS7A02G074600/TraesCS1A02G246000	4	BP
GO:0050826	response to freezing	20/3745	446/107890	0.14893	0.60416	0.56699	TraesCS6D02G315400/TraesCS6D02G203800/TraesCS2D02G506500/TraesCS4D02G329400/TraesCS1B02G238200/TraesCS5B02G152100/TraesCS4A02G110000/TraesCS6B02G366400/TraesCS6B02G356900/TraesCS1D02G228100/TraesCS5B02G153300/TraesCS4D02G195000/TraesCS6A02G330500/TraesCS4B02G194100/TraesCS7B02G114700/TraesCS4A02G333300/TraesCS1A02G226700/TraesCS3B02G382900/TraesCS6D02G309600/TraesCS4A02G333200	20	BP
GO:0006744	ubiquinone biosynthetic process	7/3745	126/107890	0.149434	0.60416	0.56699	TraesCS7A02G235000/TraesCS6D02G239700/TraesCS2A02G523400/TraesCS6B02G430100/TraesCS2D02G525500/TraesCS6B02G333600/TraesCS2B02G553300	7	BP
GO:1900864	mitochondrial RNA modification	14/3745	295/107890	0.149517	0.60416	0.56699	TraesCS7A02G262500/TraesCS7A02G264900/TraesCS7A02G253800/TraesCS6D02G306500/TraesCS7A02G231100/TraesCS6D02G242600/TraesCS7A02G247500/TraesCS6D02G307000/TraesCS6B02G010000/TraesCS6D02G378800/TraesCS6D02G208300/TraesCS6B02G344700/TraesCS6B02G433400/TraesCS4B02G120700	14	BP
GO:0070417	cellular response to cold	5/3745	81/107890	0.150738	0.60416	0.56699	TraesCS2A02G169600/TraesCS7B02G478000/TraesCS6B02G415500/TraesCS6A02G330500/TraesCS6D02G309600	5	BP
GO:0071241	cellular response to inorganic substance	13/3745	271/107890	0.151727	0.60416	0.56699	TraesCS6D02G294600/TraesCS6D02G301000/TraesCS6D02G271900/TraesCS3D02G164500/TraesCS6B02G352000/TraesCS4B02G175100/TraesCS2D02G033200/TraesCS2B02G047400/TraesCS5B02G158800/TraesCS6B02G345800/TraesCS2A02G033700/TraesCS6B02G351800/TraesCS2A02G396400	13	BP
GO:0000290	deadenylation-dependent decapping of nuclear-transcribed mRNA	2/3745	20/107890	0.151847	0.60416	0.56699	TraesCS4B02G117300/TraesCS6B02G412000	2	BP
GO:0006554	lysine catabolic process	2/3745	20/107890	0.151847	0.60416	0.56699	TraesCS6D02G325100/TraesCS6B02G376200	2	BP
GO:0007141	male meiosis I	2/3745	20/107890	0.151847	0.60416	0.56699	TraesCS6D02G315400/TraesCS6B02G366400	2	BP
GO:0010086	embryonic root morphogenesis	2/3745	20/107890	0.151847	0.60416	0.56699	TraesCS4B02G288000/TraesCS6B02G342700	2	BP
GO:0019474	L-lysine catabolic process to acetyl-CoA	2/3745	20/107890	0.151847	0.60416	0.56699	TraesCS6D02G325100/TraesCS6B02G376200	2	BP
GO:0019477	L-lysine catabolic process	2/3745	20/107890	0.151847	0.60416	0.56699	TraesCS6D02G325100/TraesCS6B02G376200	2	BP
GO:0019585	glucuronate metabolic process	2/3745	20/107890	0.151847	0.60416	0.56699	TraesCS7A02G219200/TraesCS7A02G419300	2	BP
GO:0030002	cellular anion homeostasis	2/3745	20/107890	0.151847	0.60416	0.56699	TraesCS6D02G203800/TraesCS7A02G263000	2	BP
GO:0030320	cellular monovalent inorganic anion homeostasis	2/3745	20/107890	0.151847	0.60416	0.56699	TraesCS6D02G203800/TraesCS7A02G263000	2	BP
GO:0030682	mitigation of host defenses by symbiont	2/3745	20/107890	0.151847	0.60416	0.56699	TraesCS2A02G292600/TraesCS2D02G290400	2	BP
GO:0046440	L-lysine metabolic process	2/3745	20/107890	0.151847	0.60416	0.56699	TraesCS6D02G325100/TraesCS6B02G376200	2	BP
GO:0052158	modulation by symbiont of host resistance gene-dependent defense response	2/3745	20/107890	0.151847	0.60416	0.56699	TraesCS2A02G292600/TraesCS2D02G290400	2	BP
GO:0052167	modulation by symbiont of host innate immune response	2/3745	20/107890	0.151847	0.60416	0.56699	TraesCS2A02G292600/TraesCS2D02G290400	2	BP
GO:0052390	induction by symbiont of host innate immune response	2/3745	20/107890	0.151847	0.60416	0.56699	TraesCS2A02G292600/TraesCS2D02G290400	2	BP
GO:0080185	effector-mediated induction of plant hypersensitive response by symbiont	2/3745	20/107890	0.151847	0.60416	0.56699	TraesCS2A02G292600/TraesCS2D02G290400	2	BP
GO:0140404	effector-mediated modulation of host innate immune response by symbiont	2/3745	20/107890	0.151847	0.60416	0.56699	TraesCS2A02G292600/TraesCS2D02G290400	2	BP
GO:0140415	effector-mediated modulation of host defenses by symbiont	2/3745	20/107890	0.151847	0.60416	0.56699	TraesCS2A02G292600/TraesCS2D02G290400	2	BP
GO:0031571	mitotic G1 DNA damage checkpoint	3/3745	39/107890	0.152649	0.60416	0.56699	TraesCS6D02G195300/TraesCS6D02G305800/TraesCS6B02G356400	3	BP
GO:0044783	G1 DNA damage checkpoint	3/3745	39/107890	0.152649	0.60416	0.56699	TraesCS6D02G195300/TraesCS6D02G305800/TraesCS6B02G356400	3	BP
GO:0044819	mitotic G1/S transition checkpoint	3/3745	39/107890	0.152649	0.60416	0.56699	TraesCS6D02G195300/TraesCS6D02G305800/TraesCS6B02G356400	3	BP
GO:1902807	negative regulation of cell cycle G1/S phase transition	3/3745	39/107890	0.152649	0.60416	0.56699	TraesCS6D02G195300/TraesCS6D02G305800/TraesCS6B02G356400	3	BP
GO:2000134	negative regulation of G1/S transition of mitotic cell cycle	3/3745	39/107890	0.152649	0.60416	0.56699	TraesCS6D02G195300/TraesCS6D02G305800/TraesCS6B02G356400	3	BP
GO:0006613	cotranslational protein targeting to membrane	6/3745	104/107890	0.153731	0.605759	0.568491	TraesCS7A02G255400/TraesCS7A02G221600/TraesCS4B02G117900/TraesCS3A02G207800/TraesCS4B02G117800/TraesCS4A02G066100	6	BP
GO:0018209	peptidyl-serine modification	6/3745	104/107890	0.153731	0.605759	0.568491	TraesCS6D02G241800/TraesCS2A02G528900/TraesCS1D02G288200/TraesCS3A02G190700/TraesCS6B02G413500/TraesCS6B02G412200	6	BP
GO:0016444	somatic cell DNA recombination	7/3745	127/107890	0.153745	0.605759	0.568491	TraesCS6D02G315400/TraesCS6D02G196000/TraesCS6D02G214400/TraesCS6B02G366400/TraesCS3D02G165900/TraesCS6B02G351900/TraesCS6B02G462700	7	BP
GO:0009262	deoxyribonucleotide metabolic process	4/3745	60/107890	0.154957	0.609623	0.572117	TraesCS6D02G357100/TraesCS7B02G119100/TraesCS6B02G410800/TraesCS6B02G381500	4	BP
GO:0009625	response to insect	12/3745	248/107890	0.156742	0.614836	0.577009	TraesCS6D02G294600/TraesCS6D02G369200/TraesCS6D02G369100/TraesCS6B02G405200/TraesCS6B02G423500/TraesCS5D02G285700/TraesCS5A02G278800/TraesCS5B02G278100/TraesCS6B02G423200/TraesCS6B02G345800/TraesCS4D02G265000/TraesCS4B02G265100	12	BP
GO:0031124	mRNA 3'-end processing	9/3745	175/107890	0.15675	0.614836	0.577009	TraesCS2D02G342600/TraesCS6D02G266800/TraesCS6B02G083500/TraesCS1B02G254600/TraesCSU02G248500/TraesCS6D02G318000/TraesCS7B02G114200/TraesCS7D02G325500/TraesCS7B02G229300	9	BP
GO:0009226	nucleotide-sugar biosynthetic process	6/3745	105/107890	0.158601	0.620242	0.582083	TraesCS6D02G323500/TraesCS5D02G404300/TraesCS7A02G419300/TraesCS2D02G111400/TraesCS4D02G126400/TraesCS2B02G129600	6	BP
GO:0090332	stomatal closure	6/3745	105/107890	0.158601	0.620242	0.582083	TraesCS6D02G271900/TraesCS2A02G101600/TraesCS1B02G278600/TraesCS6B02G367800/TraesCS4B02G173700/TraesCS4D02G147600	6	BP
GO:0006475	internal protein amino acid acetylation	20/3745	451/107890	0.160083	0.62511	0.586651	TraesCS6D02G253400/TraesCS6D02G253600/TraesCS6D02G247700/TraesCS6D02G232000/TraesCS6D02G196000/TraesCS6D02G317200/TraesCS4A02G372200/TraesCS7D02G069700/TraesCS7A02G074600/TraesCS5B02G526700/TraesCS2A02G528900/TraesCS1A02G107700/TraesCS2D02G339900/TraesCS3B02G151500/TraesCS7A02G414500/TraesCS7B02G261800/TraesCS7A02G191700/TraesCS6B02G412200/TraesCS7A02G414600/TraesCS6B02G355300	20	BP
GO:0046654	tetrahydrofolate biosynthetic process	3/3745	40/107890	0.161035	0.625415	0.586937	TraesCS7A02G276800/TraesCS7A02G276900/TraesCS3D02G167700	3	BP
GO:0071423	malate transmembrane transport	3/3745	40/107890	0.161035	0.625415	0.586937	TraesCS7A02G208700/TraesCS7A02G220200/TraesCS7A02G244400	3	BP
GO:0097485	neuron projection guidance	3/3745	40/107890	0.161035	0.625415	0.586937	TraesCS5B02G159100/TraesCS6B02G377200/TraesCS4D02G305100	3	BP
GO:0010380	regulation of chlorophyll biosynthetic process	4/3745	61/107890	0.161589	0.625415	0.586937	TraesCS6D02G183600/TraesCS4D02G225400/TraesCS4A02G063600/TraesCS6B02G233800	4	BP
GO:0030100	regulation of endocytosis	4/3745	61/107890	0.161589	0.625415	0.586937	TraesCS6D02G270300/TraesCS6D02G242400/TraesCS6B02G452200/TraesCS6B02G230400	4	BP
GO:0042762	regulation of sulfur metabolic process	4/3745	61/107890	0.161589	0.625415	0.586937	TraesCS7A02G246100/TraesCS6D02G335000/TraesCS6B02G385200/TraesCS6B02G226200	4	BP
GO:0048830	adventitious root development	5/3745	83/107890	0.161863	0.625552	0.587066	TraesCS2B02G300500/TraesCS5D02G454200/TraesCS6B02G337300/TraesCS6B02G466700/TraesCS6B02G369300	5	BP
GO:0031425	chloroplast RNA processing	13/3745	275/107890	0.163442	0.627066	0.588487	TraesCS6D02G247900/TraesCS6D02G191000/TraesCS7A02G264900/TraesCS7A02G247500/TraesCS6D02G307000/TraesCS7A02G242100/TraesCS1B02G257400/TraesCS6D02G378800/TraesCS1A02G355000/TraesCS6B02G224800/TraesCS6B02G236000/TraesCS6B02G433400/TraesCS4B02G120700	13	BP
GO:0051784	negative regulation of nuclear division	6/3745	106/107890	0.163537	0.627066	0.588487	TraesCS6D02G191700/TraesCS6D02G233200/TraesCS6D02G327000/TraesCS4B02G308700/TraesCS6A02G309600/TraesCS6B02G236700	6	BP
GO:0006290	pyrimidine dimer repair	2/3745	21/107890	0.164163	0.627066	0.588487	TraesCS7A02G267500/TraesCS6A02G177000	2	BP
GO:0006621	protein retention in ER lumen	2/3745	21/107890	0.164163	0.627066	0.588487	TraesCS7A02G271400/TraesCS6B02G417700	2	BP
GO:0030072	peptide hormone secretion	2/3745	21/107890	0.164163	0.627066	0.588487	TraesCS6B02G344100/TraesCS6B02G229000	2	BP
GO:0032025	response to cobalt ion	2/3745	21/107890	0.164163	0.627066	0.588487	TraesCS7A02G419500/TraesCS7A02G420000	2	BP
GO:0051298	centrosome duplication	2/3745	21/107890	0.164163	0.627066	0.588487	TraesCS7A02G278700/TraesCS7B02G176600	2	BP
GO:0072347	response to anesthetic	2/3745	21/107890	0.164163	0.627066	0.588487	TraesCS7A02G040900/TraesCS2B02G429300	2	BP
GO:0015691	cadmium ion transport	5/3745	84/107890	0.167545	0.639056	0.599739	TraesCS5B02G155400/TraesCS7A02G419500/TraesCS7A02G420000/TraesCS5B02G155600/TraesCS7B02G271600	5	BP
GO:0002683	negative regulation of immune system process	4/3745	62/107890	0.168322	0.639236	0.599908	TraesCS6D02G196000/TraesCS4D02G145700/TraesCS6B02G350800/TraesCS5B02G153300	4	BP
GO:0007000	nucleolus organization	4/3745	62/107890	0.168322	0.639236	0.599908	TraesCS4B02G109300/TraesCS1B02G266900/TraesCS7B02G121400/TraesCS6B02G447600	4	BP
GO:1901463	regulation of tetrapyrrole biosynthetic process	4/3745	62/107890	0.168322	0.639236	0.599908	TraesCS6D02G183600/TraesCS4D02G225400/TraesCS4A02G063600/TraesCS6B02G233800	4	BP
GO:0031929	TOR signaling	3/3745	41/107890	0.169557	0.642068	0.602565	TraesCS6D02G194900/TraesCS6B02G405200/TraesCS6B02G241500	3	BP
GO:0035282	segmentation	3/3745	41/107890	0.169557	0.642068	0.602565	TraesCS6B02G405200/TraesCS6B02G350800/TraesCS4D02G305100	3	BP
GO:0048863	stem cell differentiation	16/3745	353/107890	0.17037	0.644221	0.604586	TraesCS7A02G260600/TraesCS6D02G293200/TraesCS1A02G199900/TraesCS3A02G432900/TraesCS3D02G427900/TraesCS3A02G434900/TraesCS2B02G300500/TraesCS7D02G261900/TraesCS5D02G454200/TraesCS2D02G442200/TraesCS3D02G428000/TraesCS7B02G158900/TraesCS7D02G176700/TraesCS6B02G350800/TraesCS6B02G343900/TraesCS6B02G466700	16	BP
GO:0090068	positive regulation of cell cycle process	7/3745	131/107890	0.171547	0.647739	0.607888	TraesCS6D02G195300/TraesCS6D02G305800/TraesCS6D02G192000/TraesCS6B02G356900/TraesCS6B02G356400/TraesCS7B02G216700/TraesCS7D02G312700	7	BP
GO:0009084	glutamine family amino acid biosynthetic process	9/3745	179/107890	0.171871	0.648031	0.608162	TraesCS6D02G251000/TraesCS1B02G257300/TraesCS2B02G106500/TraesCS6A02G298100/TraesCS5B02G154400/TraesCS3A02G206600/TraesCS4D02G047400/TraesCS4A02G266900/TraesCS6B02G274800	9	BP
GO:0007018	microtubule-based movement	18/3745	405/107890	0.172785	0.648966	0.609039	TraesCS6D02G221400/TraesCS7A02G279000/TraesCS6B02G139400/TraesCS6D02G403700/TraesCS7A02G253400/TraesCS3D02G038700/TraesCS1B02G269400/TraesCS1B02G259800/TraesCS5B02G159100/TraesCS6B02G365300/TraesCS6B02G417400/TraesCS1A02G033200/TraesCS5B02G156500/TraesCS6B02G415600/TraesCS1D02G034600/TraesCS6B02G466400/TraesCS2A02G132600/TraesCS6B02G461200	18	BP
GO:0000289	nuclear-transcribed mRNA poly(A) tail shortening	5/3745	85/107890	0.173305	0.648966	0.609039	TraesCS1B02G254600/TraesCS6D02G318000/TraesCS5B02G159400/TraesCS6B02G391400/TraesCS7B02G114200	5	BP
GO:0006513	protein monoubiquitination	5/3745	85/107890	0.173305	0.648966	0.609039	TraesCS6D02G254700/TraesCS6D02G216400/TraesCS6B02G335200/TraesCS6B02G350800/TraesCS5B02G158800	5	BP
GO:0030091	protein repair	5/3745	85/107890	0.173305	0.648966	0.609039	TraesCS6D02G311300/TraesCS7D02G548900/TraesCS1B02G261800/TraesCS6B02G337900/TraesCS6B02G362800	5	BP
GO:0006487	protein N-linked glycosylation	19/3745	431/107890	0.173537	0.648966	0.609039	TraesCS6D02G185500/TraesCS7A02G252700/TraesCS7A02G244100/TraesCS6D02G250200/TraesCS2B02G332800/TraesCS6B02G440200/TraesCS6B02G471700/TraesCS3A02G207000/TraesCS7A02G415500/TraesCS6B02G230900/TraesCS4B02G173000/TraesCS4D02G126400/TraesCS6B02G409700/TraesCS6B02G238000/TraesCS6B02G339600/TraesCS2B02G429200/TraesCS6B02G393900/TraesCS6D02G080500/TraesCS6A02G091700	19	BP
GO:0010192	mucilage biosynthetic process	6/3745	108/107890	0.173601	0.648966	0.609039	TraesCS1A02G033200/TraesCS4D02G112900/TraesCS4B02G115200/TraesCS1D02G034600/TraesCS4B02G346100/TraesCS2A02G132600	6	BP
GO:0001754	eye photoreceptor cell differentiation	2/3745	22/107890	0.176647	0.651446	0.611367	TraesCS6B02G377200/TraesCS4D02G305100	2	BP
GO:0007076	mitotic chromosome condensation	2/3745	22/107890	0.176647	0.651446	0.611367	TraesCS1B02G244100/TraesCS6B02G341400	2	BP
GO:0010970	transport along microtubule	2/3745	22/107890	0.176647	0.651446	0.611367	TraesCS5B02G159100/TraesCS6B02G461200	2	BP
GO:0019627	urea metabolic process	2/3745	22/107890	0.176647	0.651446	0.611367	TraesCS1B02G257300/TraesCS3A02G206600	2	BP
GO:0034214	protein hexamerization	2/3745	22/107890	0.176647	0.651446	0.611367	TraesCS6D02G183600/TraesCS6B02G233800	2	BP
GO:0045039	protein insertion into mitochondrial inner membrane	2/3745	22/107890	0.176647	0.651446	0.611367	TraesCS6D02G240500/TraesCS7A02G262900	2	BP
GO:0046530	photoreceptor cell differentiation	2/3745	22/107890	0.176647	0.651446	0.611367	TraesCS6B02G377200/TraesCS4D02G305100	2	BP
GO:0099111	microtubule-based transport	2/3745	22/107890	0.176647	0.651446	0.611367	TraesCS5B02G159100/TraesCS6B02G461200	2	BP
GO:1900407	regulation of cellular response to oxidative stress	2/3745	22/107890	0.176647	0.651446	0.611367	TraesCS6D02G320800/TraesCS6B02G371500	2	BP
GO:0000105	histidine biosynthetic process	3/3745	42/107890	0.178204	0.651446	0.611367	TraesCS6D02G252200/TraesCS6D02G255300/TraesCS1B02G261600	3	BP
GO:0007601	visual perception	3/3745	42/107890	0.178204	0.651446	0.611367	TraesCS7A02G248400/TraesCS4D02G351800/TraesCS4B02G358500	3	BP
GO:0009228	thiamine biosynthetic process	3/3745	42/107890	0.178204	0.651446	0.611367	TraesCS7A02G286300/TraesCS1B02G255100/TraesCS1B02G266500	3	BP
GO:0050953	sensory perception of light stimulus	3/3745	42/107890	0.178204	0.651446	0.611367	TraesCS7A02G248400/TraesCS4D02G351800/TraesCS4B02G358500	3	BP
GO:0071479	cellular response to ionizing radiation	3/3745	42/107890	0.178204	0.651446	0.611367	TraesCS6D02G301000/TraesCS6B02G352000/TraesCS6B02G351800	3	BP
GO:0045036	protein targeting to chloroplast	13/3745	280/107890	0.178709	0.651446	0.611367	TraesCS6D02G337500/TraesCS6D02G183600/TraesCS6D02G205400/TraesCS6D02G341400/TraesCS5A02G099700/TraesCS1B02G254000/TraesCS6B02G388100/TraesCS6B02G233800/TraesCS6B02G386400/TraesCS7B02G176100/TraesCS4B02G117900/TraesCS4B02G117800/TraesCS6B02G239000	13	BP
GO:0072596	establishment of protein localization to chloroplast	13/3745	280/107890	0.178709	0.651446	0.611367	TraesCS6D02G337500/TraesCS6D02G183600/TraesCS6D02G205400/TraesCS6D02G341400/TraesCS5A02G099700/TraesCS1B02G254000/TraesCS6B02G388100/TraesCS6B02G233800/TraesCS6B02G386400/TraesCS7B02G176100/TraesCS4B02G117900/TraesCS4B02G117800/TraesCS6B02G239000	13	BP
GO:0007423	sensory organ development	11/3745	230/107890	0.17872	0.651446	0.611367	TraesCS6D02G195300/TraesCS6D02G302200/TraesCS6D02G379500/TraesCS6A02G406200/TraesCS7A02G262700/TraesCS1D02G288200/TraesCS6B02G377200/TraesCS6B02G335200/TraesCS6B02G353100/TraesCS7A02G418100/TraesCS4D02G305100	11	BP
GO:0015780	nucleotide-sugar transmembrane transport	6/3745	109/107890	0.178726	0.651446	0.611367	TraesCS6D02G187100/TraesCS2A02G380500/TraesCS2D02G376800/TraesCS2B02G397500/TraesCS6B02G224000/TraesCS4D02G245400	6	BP
GO:0006526	arginine biosynthetic process	5/3745	86/107890	0.17914	0.652049	0.611933	TraesCS6D02G251000/TraesCS1B02G257300/TraesCS5B02G154400/TraesCS3A02G206600/TraesCS6B02G274800	5	BP
GO:0010092	specification of animal organ identity	7/3745	133/107890	0.180769	0.656163	0.615793	TraesCS6D02G240200/TraesCS7A02G260600/TraesCS6D02G220400/TraesCS3A02G434900/TraesCS2B02G300500/TraesCS7B02G235800/TraesCS7A02G413700	7	BP
GO:1902850	microtubule cytoskeleton organization involved in mitosis	7/3745	133/107890	0.180769	0.656163	0.615793	TraesCS7A02G278700/TraesCS1A02G246000/TraesCS5B02G156500/TraesCS7B02G176600/TraesCS5D02G184300/TraesCS5A02G179700/TraesCS5B02G177500	7	BP
GO:0016106	sesquiterpenoid biosynthetic process	10/3745	206/107890	0.181415	0.657599	0.617141	TraesCS7A02G256900/TraesCS2B02G106500/TraesCS4B02G095400/TraesCS5B02G375900/TraesCS3A02G289900/TraesCS3D02G289600/TraesCS4B02G151300/TraesCS3B02G324500/TraesCS3D02G166900/TraesCS3A02G210800	10	BP
GO:0072598	protein localization to chloroplast	13/3745	281/107890	0.181843	0.657712	0.617248	TraesCS6D02G337500/TraesCS6D02G183600/TraesCS6D02G205400/TraesCS6D02G341400/TraesCS5A02G099700/TraesCS1B02G254000/TraesCS6B02G388100/TraesCS6B02G233800/TraesCS6B02G386400/TraesCS7B02G176100/TraesCS4B02G117900/TraesCS4B02G117800/TraesCS6B02G239000	13	BP
GO:0010586	miRNA metabolic process	4/3745	64/107890	0.182075	0.657712	0.617248	TraesCS6D02G358000/TraesCS5D02G454200/TraesCS6B02G466700/TraesCS6B02G411500	4	BP
GO:0048236	plant-type sporogenesis	11/3745	231/107890	0.182197	0.657712	0.617248	TraesCS6D02G186900/TraesCS6D02G191600/TraesCS6D02G293200/TraesCS7B02G009900/TraesCS7D02G176700/TraesCS6B02G223700/TraesCS6B02G468200/TraesCS6B02G236600/TraesCS3D02G164600/TraesCS6B02G343900/TraesCS4D02G104300	11	BP
GO:0002694	regulation of leukocyte activation	6/3745	110/107890	0.183912	0.66299	0.622201	TraesCS6D02G242400/TraesCS4B02G071600/TraesCS2D02G480300/TraesCS6B02G452200/TraesCS4D02G091500/TraesCS5D02G479300	6	BP
GO:0010948	negative regulation of cell cycle process	13/3745	282/107890	0.185004	0.664338	0.623465	TraesCS6D02G195300/TraesCS6D02G191700/TraesCS6D02G305800/TraesCS6D02G233200/TraesCS6D02G291000/TraesCS6D02G327000/TraesCS6D02G354500/TraesCS4B02G308700/TraesCS6A02G309600/TraesCS6B02G356400/TraesCS6B02G236700/TraesCS6B02G341900/TraesCS6B02G407600	13	BP
GO:0009830	cell wall modification involved in abscission	8/3745	158/107890	0.185124	0.664338	0.623465	TraesCS2A02G175000/TraesCS5D02G107900/TraesCS5B02G101400/TraesCS6B02G418400/TraesCS5A02G095200/TraesCS2D02G182400/TraesCS2B02G201400/TraesCS3D02G403000	8	BP
GO:0044277	cell wall disassembly	8/3745	158/107890	0.185124	0.664338	0.623465	TraesCS2A02G175000/TraesCS5D02G107900/TraesCS5B02G101400/TraesCS6B02G418400/TraesCS5A02G095200/TraesCS2D02G182400/TraesCS2B02G201400/TraesCS3D02G403000	8	BP
GO:0050665	hydrogen peroxide biosynthetic process	12/3745	257/107890	0.185604	0.664338	0.623465	TraesCS7A02G210100/TraesCS6D02G272400/TraesCS6D02G325100/TraesCS6D02G236400/TraesCS1B02G265300/TraesCS3D02G366500/TraesCS5D02G230300/TraesCS6B02G436400/TraesCS4D02G133700/TraesCS6B02G415700/TraesCS6B02G376200/TraesCS2A02G368700	12	BP
GO:0032103	positive regulation of response to external stimulus	11/3745	232/107890	0.185706	0.664338	0.623465	TraesCS7A02G262400/TraesCS6D02G179200/TraesCS2A02G169600/TraesCS7B02G478000/TraesCS6B02G403400/TraesCS3A02G205600/TraesCS6B02G281000/TraesCS2A02G292600/TraesCS2D02G290400/TraesCS6A02G243300/TraesCS4D02G121300	11	BP
GO:0009806	lignan metabolic process	3/3745	43/107890	0.186969	0.664338	0.623465	TraesCS7A02G211400/TraesCS2B02G102900/TraesCS6D02G015400	3	BP
GO:0009807	lignan biosynthetic process	3/3745	43/107890	0.186969	0.664338	0.623465	TraesCS7A02G211400/TraesCS2B02G102900/TraesCS6D02G015400	3	BP
GO:0033273	response to vitamin	3/3745	43/107890	0.186969	0.664338	0.623465	TraesCS6D02G294500/TraesCS6D02G294800/TraesCS6B02G345700	3	BP
GO:0110154	RNA decapping	3/3745	43/107890	0.186969	0.664338	0.623465	TraesCS6D02G359000/TraesCS4B02G117300/TraesCS6B02G412000	3	BP
GO:0110156	methylguanosine-cap decapping	3/3745	43/107890	0.186969	0.664338	0.623465	TraesCS6D02G359000/TraesCS4B02G117300/TraesCS6B02G412000	3	BP
GO:0000086	G2/M transition of mitotic cell cycle	14/3745	308/107890	0.187066	0.664338	0.623465	TraesCS6D02G324300/TraesCS7A02G248700/TraesCS6D02G327000/TraesCS6D02G214400/TraesCS7A02G246000/TraesCS6B02G344300/TraesCS5B02G156900/TraesCS6B02G341400/TraesCS6B02G356900/TraesCS7B02G216700/TraesCS7D02G312700/TraesCS6B02G375500/TraesCS6B02G393100/TraesCS6B02G462700	14	BP
GO:0043967	histone H4 acetylation	4/3745	65/107890	0.189086	0.665867	0.624901	TraesCS6D02G232000/TraesCS4A02G372200/TraesCS7D02G069700/TraesCS7A02G074600	4	BP
GO:0035434	copper ion transmembrane transport	6/3745	111/107890	0.189156	0.665867	0.624901	TraesCS5D02G218300/TraesCS5B02G210000/TraesCS5A02G213700/TraesCS7A02G419500/TraesCS7A02G420000/TraesCS2B02G429200	6	BP
GO:0006063	uronic acid metabolic process	2/3745	23/107890	0.189271	0.665867	0.624901	TraesCS7A02G219200/TraesCS7A02G419300	2	BP
GO:0006116	NADH oxidation	2/3745	23/107890	0.189271	0.665867	0.624901	TraesCS2D02G408700/TraesCS2B02G430000	2	BP
GO:0034053	modulation by symbiont of host defense-related programmed cell death	2/3745	23/107890	0.189271	0.665867	0.624901	TraesCS2A02G292600/TraesCS2D02G290400	2	BP
GO:0052031	modulation by symbiont of host defense response	2/3745	23/107890	0.189271	0.665867	0.624901	TraesCS2A02G292600/TraesCS2D02G290400	2	BP
GO:0070663	regulation of leukocyte proliferation	2/3745	23/107890	0.189271	0.665867	0.624901	TraesCS2D02G480300/TraesCS4D02G091500	2	BP
GO:0042732	D-xylose metabolic process	7/3745	135/107890	0.190194	0.668221	0.627109	TraesCS5D02G404300/TraesCS6B02G415700/TraesCS4B02G173300/TraesCS2D02G111400/TraesCS2B02G129600/TraesCS5B02G244000/TraesCS5D02G253400	7	BP
GO:0044839	cell cycle G2/M phase transition	14/3745	310/107890	0.193214	0.677925	0.636217	TraesCS6D02G324300/TraesCS7A02G248700/TraesCS6D02G327000/TraesCS6D02G214400/TraesCS7A02G246000/TraesCS6B02G344300/TraesCS5B02G156900/TraesCS6B02G341400/TraesCS6B02G356900/TraesCS7B02G216700/TraesCS7D02G312700/TraesCS6B02G375500/TraesCS6B02G393100/TraesCS6B02G462700	14	BP
GO:0001501	skeletal system development	6/3745	112/107890	0.194456	0.681375	0.639454	TraesCS6D02G204700/TraesCS6D02G232000/TraesCS3B02G162400/TraesCS4B02G358500/TraesCS4D02G126400/TraesCS4D02G091500	6	BP
GO:0006501	C-terminal protein lipidation	3/3745	44/107890	0.195842	0.683497	0.641446	TraesCS6D02G210300/TraesCS7B02G070300/TraesCS6B02G366600	3	BP
GO:0031099	regeneration	3/3745	44/107890	0.195842	0.683497	0.641446	TraesCS6D02G213600/TraesCS6D02G199500/TraesCS2A02G350900	3	BP
GO:2000038	regulation of stomatal complex development	3/3745	44/107890	0.195842	0.683497	0.641446	TraesCS6D02G328800/TraesCS6B02G379500/TraesCS7D02G254300	3	BP
GO:0046496	nicotinamide nucleotide metabolic process	4/3745	66/107890	0.196181	0.683771	0.641703	TraesCS7A02G278400/TraesCS6D02G370600/TraesCS1B02G253900/TraesCS7B02G175800	4	BP
GO:0044057	regulation of system process	10/3745	210/107890	0.196492	0.683949	0.64187	TraesCS6D02G270300/TraesCS6D02G234100/TraesCS6D02G190300/TraesCS6D02G187000/TraesCS1A02G021200/TraesCS6D02G238300/TraesCS6D02G349100/TraesCS6B02G344100/TraesCS6B02G451000/TraesCS2D02G533700	10	BP
GO:0001541	ovarian follicle development	2/3745	24/107890	0.20201	0.694955	0.652199	TraesCS6B02G421000/TraesCS2B02G594400	2	BP
GO:0010262	somatic embryogenesis	2/3745	24/107890	0.20201	0.694955	0.652199	TraesCS6D02G199500/TraesCS2A02G350900	2	BP
GO:0010469	regulation of signaling receptor activity	2/3745	24/107890	0.20201	0.694955	0.652199	TraesCS6D02G336200/TraesCS6B02G386600	2	BP
GO:0015843	methylammonium transport	2/3745	24/107890	0.20201	0.694955	0.652199	TraesCS4B02G349500/TraesCS3D02G163400	2	BP
GO:0015976	carbon utilization	2/3745	24/107890	0.20201	0.694955	0.652199	TraesCS3A02G230100/TraesCS3D02G222400	2	BP
GO:0032922	circadian regulation of gene expression	2/3745	24/107890	0.20201	0.694955	0.652199	TraesCS1A02G107700/TraesCS3B02G151500	2	BP
GO:0046879	hormone secretion	2/3745	24/107890	0.20201	0.694955	0.652199	TraesCS6B02G344100/TraesCS6B02G229000	2	BP
GO:0051924	regulation of calcium ion transport	2/3745	24/107890	0.20201	0.694955	0.652199	TraesCS6B02G344100/TraesCS4A02G405400	2	BP
GO:0050821	protein stabilization	5/3745	90/107890	0.203177	0.694955	0.652199	TraesCS6D02G380400/TraesCS2D02G033200/TraesCS2B02G047400/TraesCS6B02G435000/TraesCS2A02G033700	5	BP
GO:0090329	regulation of DNA-dependent DNA replication	5/3745	90/107890	0.203177	0.694955	0.652199	TraesCS6D02G233200/TraesCS6D02G291000/TraesCS6D02G354500/TraesCS6B02G341900/TraesCS6B02G407600	5	BP
GO:0007596	blood coagulation	4/3745	67/107890	0.203356	0.694955	0.652199	TraesCS5B02G159100/TraesCS5B02G155400/TraesCS3A02G205700/TraesCS5B02G155600	4	BP
GO:0007599	hemostasis	4/3745	67/107890	0.203356	0.694955	0.652199	TraesCS5B02G159100/TraesCS5B02G155400/TraesCS3A02G205700/TraesCS5B02G155600	4	BP
GO:0032104	regulation of response to extracellular stimulus	4/3745	67/107890	0.203356	0.694955	0.652199	TraesCS2A02G169600/TraesCS7B02G478000/TraesCS6B02G403400/TraesCS3A02G205600	4	BP
GO:0032107	regulation of response to nutrient levels	4/3745	67/107890	0.203356	0.694955	0.652199	TraesCS2A02G169600/TraesCS7B02G478000/TraesCS6B02G403400/TraesCS3A02G205600	4	BP
GO:0000380	alternative mRNA splicing, via spliceosome	3/3745	45/107890	0.204815	0.69542	0.652635	TraesCS7A02G234600/TraesCS1B02G252100/TraesCS6B02G415500	3	BP
GO:0046651	lymphocyte proliferation	3/3745	45/107890	0.204815	0.69542	0.652635	TraesCS2D02G480300/TraesCS6B02G344100/TraesCS4D02G091500	3	BP
GO:0048859	formation of anatomical boundary	3/3745	45/107890	0.204815	0.69542	0.652635	TraesCS3A02G140700/TraesCS4A02G067300/TraesCS4D02G225200	3	BP
GO:0051026	chiasma assembly	3/3745	45/107890	0.204815	0.69542	0.652635	TraesCS6D02G315400/TraesCS1B02G328200/TraesCS6B02G366400	3	BP
GO:0062014	negative regulation of small molecule metabolic process	3/3745	45/107890	0.204815	0.69542	0.652635	TraesCS6D02G335000/TraesCS6B02G385200/TraesCS6B02G226200	3	BP
GO:0050878	regulation of body fluid levels	5/3745	91/107890	0.209348	0.709893	0.666217	TraesCS6A02G037600/TraesCS5B02G159100/TraesCS5B02G155400/TraesCS3A02G205700/TraesCS5B02G155600	5	BP
GO:2001057	reactive nitrogen species metabolic process	12/3745	264/107890	0.209642	0.709973	0.666293	TraesCS7A02G259700/TraesCS6D02G260500/TraesCS1B02G267900/TraesCS6D02G020700/TraesCS6A02G298100/TraesCS7B02G113600/TraesCS5B02G153300/TraesCS3D02G166900/TraesCS5B02G414000/TraesCS7B02G262200/TraesCS6B02G356800/TraesCS6A02G326200	12	BP
GO:0009877	nodulation	4/3745	68/107890	0.210607	0.711389	0.667621	TraesCS7A02G091800/TraesCS4A02G392100/TraesCS7D02G087800/TraesCS4A02G392500	4	BP
GO:0080001	mucilage extrusion from seed coat	4/3745	68/107890	0.210607	0.711389	0.667621	TraesCS7A02G211600/TraesCS6D02G319900/TraesCS6B02G369400/TraesCS6B02G370300	4	BP
GO:0031331	positive regulation of cellular catabolic process	8/3745	164/107890	0.211736	0.711389	0.667621	TraesCS5B02G153700/TraesCS5A02G548000/TraesCS6B02G341600/TraesCS1D02G072900/TraesCS7B02G114200/TraesCS3A02G232500/TraesCS4B02G208900/TraesCS3D02G220700	8	BP
GO:1904062	regulation of cation transmembrane transport	14/3745	316/107890	0.212209	0.711389	0.667621	TraesCS6D02G202000/TraesCS7A02G282100/TraesCS6D02G202300/TraesCS6D02G274600/TraesCS6D02G275700/TraesCS6D02G239700/TraesCS6D02G227700/TraesCS6B02G390600/TraesCS1B02G266500/TraesCS6B02G344100/TraesCS5B02G155200/TraesCS6B02G352700/TraesCS6B02G454500/TraesCS7A02G414600	14	BP
GO:0016573	histone acetylation	19/3745	446/107890	0.21222	0.711389	0.667621	TraesCS6D02G253400/TraesCS6D02G253600/TraesCS6D02G247700/TraesCS6D02G232000/TraesCS6D02G196000/TraesCS6D02G317200/TraesCS4A02G372200/TraesCS7D02G069700/TraesCS7A02G074600/TraesCS5B02G526700/TraesCS2A02G528900/TraesCS1A02G107700/TraesCS2D02G339900/TraesCS3B02G151500/TraesCS7A02G414500/TraesCS7B02G261800/TraesCS7A02G191700/TraesCS7A02G414600/TraesCS6B02G355300	19	BP
GO:0018393	internal peptidyl-lysine acetylation	19/3745	446/107890	0.21222	0.711389	0.667621	TraesCS6D02G253400/TraesCS6D02G253600/TraesCS6D02G247700/TraesCS6D02G232000/TraesCS6D02G196000/TraesCS6D02G317200/TraesCS4A02G372200/TraesCS7D02G069700/TraesCS7A02G074600/TraesCS5B02G526700/TraesCS2A02G528900/TraesCS1A02G107700/TraesCS2D02G339900/TraesCS3B02G151500/TraesCS7A02G414500/TraesCS7B02G261800/TraesCS7A02G191700/TraesCS7A02G414600/TraesCS6B02G355300	19	BP
GO:0018394	peptidyl-lysine acetylation	19/3745	446/107890	0.21222	0.711389	0.667621	TraesCS6D02G253400/TraesCS6D02G253600/TraesCS6D02G247700/TraesCS6D02G232000/TraesCS6D02G196000/TraesCS6D02G317200/TraesCS4A02G372200/TraesCS7D02G069700/TraesCS7A02G074600/TraesCS5B02G526700/TraesCS2A02G528900/TraesCS1A02G107700/TraesCS2D02G339900/TraesCS3B02G151500/TraesCS7A02G414500/TraesCS7B02G261800/TraesCS7A02G191700/TraesCS7A02G414600/TraesCS6B02G355300	19	BP
GO:0007190	activation of adenylate cyclase activity	9/3745	189/107890	0.212401	0.711389	0.667621	TraesCS6D02G186200/TraesCS7A02G263400/TraesCS3B02G146300/TraesCS6B02G452200/TraesCS6B02G451000/TraesCS4B02G173700/TraesCS6B02G229000/TraesCS6A02G323800/TraesCS6B02G354400	9	BP
GO:0007269	neurotransmitter secretion	2/3745	25/107890	0.214843	0.711389	0.667621	TraesCS1A02G089300/TraesCS1B02G252100	2	BP
GO:0010455	positive regulation of cell fate commitment	2/3745	25/107890	0.214843	0.711389	0.667621	TraesCS7A02G068000/TraesCS7D02G062100	2	BP
GO:0035437	maintenance of protein localization in endoplasmic reticulum	2/3745	25/107890	0.214843	0.711389	0.667621	TraesCS7A02G271400/TraesCS6B02G417700	2	BP
GO:0051512	positive regulation of unidimensional cell growth	2/3745	25/107890	0.214843	0.711389	0.667621	TraesCS6D02G358000/TraesCS6B02G411500	2	BP
GO:0060260	regulation of transcription initiation from RNA polymerase II promoter	2/3745	25/107890	0.214843	0.711389	0.667621	TraesCS6B02G376500/TraesCS6B02G341600	2	BP
GO:0060261	positive regulation of transcription initiation from RNA polymerase II promoter	2/3745	25/107890	0.214843	0.711389	0.667621	TraesCS6B02G376500/TraesCS6B02G341600	2	BP
GO:0099643	signal release from synapse	2/3745	25/107890	0.214843	0.711389	0.667621	TraesCS1A02G089300/TraesCS1B02G252100	2	BP
GO:2000144	positive regulation of DNA-templated transcription, initiation	2/3745	25/107890	0.214843	0.711389	0.667621	TraesCS6B02G376500/TraesCS6B02G341600	2	BP
GO:0010563	negative regulation of phosphorus metabolic process	19/3745	447/107890	0.214932	0.711389	0.667621	TraesCS6D02G336200/TraesCS6D02G263500/TraesCS6D02G301100/TraesCS6A02G037000/TraesCSU02G125400/TraesCS7B02G278100/TraesCS5A02G552500/TraesCS1B02G243500/TraesCS4B02G388100/TraesCS7B02G027500/TraesCS1B02G255700/TraesCS3B02G573800/TraesCS3D02G513300/TraesCS6B02G235500/TraesCS6B02G352100/TraesCS6B02G345300/TraesCS5B02G159300/TraesCS6B02G386600/TraesCS5D02G247100	19	BP
GO:0045936	negative regulation of phosphate metabolic process	19/3745	447/107890	0.214932	0.711389	0.667621	TraesCS6D02G336200/TraesCS6D02G263500/TraesCS6D02G301100/TraesCS6A02G037000/TraesCSU02G125400/TraesCS7B02G278100/TraesCS5A02G552500/TraesCS1B02G243500/TraesCS4B02G388100/TraesCS7B02G027500/TraesCS1B02G255700/TraesCS3B02G573800/TraesCS3D02G513300/TraesCS6B02G235500/TraesCS6B02G352100/TraesCS6B02G345300/TraesCS5B02G159300/TraesCS6B02G386600/TraesCS5D02G247100	19	BP
GO:0006388	tRNA splicing, via endonucleolytic cleavage and ligation	5/3745	92/107890	0.215579	0.712632	0.668788	TraesCS1B02G215400/TraesCS1D02G204400/TraesCS4B02G085000/TraesCS3D02G163900/TraesCS4D02G141600	5	BP
GO:0043934	sporulation	20/3745	474/107890	0.216867	0.715987	0.671937	TraesCS6D02G186900/TraesCS6D02G191600/TraesCS6D02G293200/TraesCS6D02G216400/TraesCS7B02G009900/TraesCS7A02G275500/TraesCS7D02G176700/TraesCS6B02G223700/TraesCS6B02G468200/TraesCS3A02G211000/TraesCS7B02G176900/TraesCS6B02G236600/TraesCS3D02G164600/TraesCS6B02G343900/TraesCS4D02G212300/TraesCS4B02G212300/TraesCS3D02G045500/TraesCS3B02G049900/TraesCS4D02G104300/TraesCS7A02G394700	20	BP
GO:0030641	regulation of cellular pH	4/3745	69/107890	0.21793	0.717693	0.673538	TraesCS7A02G244400/TraesCS7A02G242300/TraesCS3A02G210400/TraesCS4D02G147600	4	BP
GO:0051453	regulation of intracellular pH	4/3745	69/107890	0.21793	0.717693	0.673538	TraesCS7A02G244400/TraesCS7A02G242300/TraesCS3A02G210400/TraesCS4D02G147600	4	BP
GO:0007140	male meiotic nuclear division	7/3745	141/107890	0.21959	0.722256	0.67782	TraesCS6D02G315400/TraesCS6D02G196000/TraesCS5D02G454200/TraesCS6B02G366400/TraesCS3D02G164600/TraesCS6B02G351900/TraesCS6B02G354700	7	BP
GO:0007409	axonogenesis	6/3745	117/107890	0.221754	0.726293	0.681609	TraesCS6D02G242400/TraesCS1B02G266200/TraesCS5B02G159100/TraesCS6B02G377200/TraesCS6B02G335200/TraesCS4D02G305100	6	BP
GO:0031098	stress-activated protein kinase signaling cascade	6/3745	117/107890	0.221754	0.726293	0.681609	TraesCS6D02G328800/TraesCS6D02G276500/TraesCS2D02G480300/TraesCS6B02G452200/TraesCS6B02G226200/TraesCS6B02G379500	6	BP
GO:0061564	axon development	6/3745	117/107890	0.221754	0.726293	0.681609	TraesCS6D02G242400/TraesCS1B02G266200/TraesCS5B02G159100/TraesCS6B02G377200/TraesCS6B02G335200/TraesCS4D02G305100	6	BP
GO:0006547	histidine metabolic process	3/3745	47/107890	0.223028	0.726293	0.681609	TraesCS6D02G252200/TraesCS6D02G255300/TraesCS1B02G261600	3	BP
GO:0008015	blood circulation	3/3745	47/107890	0.223028	0.726293	0.681609	TraesCS6B02G425700/TraesCS6B02G344100/TraesCS5D02G479300	3	BP
GO:0018410	C-terminal protein amino acid modification	3/3745	47/107890	0.223028	0.726293	0.681609	TraesCS6D02G210300/TraesCS7B02G070300/TraesCS6B02G366600	3	BP
GO:0080026	response to indolebutyric acid	3/3745	47/107890	0.223028	0.726293	0.681609	TraesCS5B02G155400/TraesCS5B02G155600/TraesCS7B02G271600	3	BP
GO:0090333	regulation of stomatal closure	3/3745	47/107890	0.223028	0.726293	0.681609	TraesCS6D02G271900/TraesCS1B02G278600/TraesCS4D02G147600	3	BP
GO:0009638	phototropism	4/3745	70/107890	0.225319	0.728721	0.683887	TraesCS6D02G211700/TraesCS5B02G155200/TraesCS6B02G237800/TraesCS4D02G120400	4	BP
GO:0045321	leukocyte activation	8/3745	167/107890	0.225565	0.728721	0.683887	TraesCS6D02G270300/TraesCS6D02G242400/TraesCS4B02G071600/TraesCS2D02G480300/TraesCS6B02G344100/TraesCS6B02G452200/TraesCS4D02G091500/TraesCS5D02G479300	8	BP
GO:0006044	N-acetylglucosamine metabolic process	2/3745	26/107890	0.227746	0.728721	0.683887	TraesCS6B02G470000/TraesCS4D02G126400	2	BP
GO:0006552	leucine catabolic process	2/3745	26/107890	0.227746	0.728721	0.683887	TraesCS6D02G393200/TraesCS6B02G455600	2	BP
GO:0010811	positive regulation of cell-substrate adhesion	2/3745	26/107890	0.227746	0.728721	0.683887	TraesCS7A02G221500/TraesCS6B02G241000	2	BP
GO:0032065	maintenance of protein location in cell cortex	2/3745	26/107890	0.227746	0.728721	0.683887	TraesCS6D02G241800/TraesCS1B02G252700	2	BP
GO:0043243	positive regulation of protein-containing complex disassembly	2/3745	26/107890	0.227746	0.728721	0.683887	TraesCS3D02G164500/TraesCS6B02G411200	2	BP
GO:0046080	dUTP metabolic process	2/3745	26/107890	0.227746	0.728721	0.683887	TraesCS7B02G119100/TraesCS6B02G381500	2	BP
GO:0052559	induction by symbiont of host immune response	2/3745	26/107890	0.227746	0.728721	0.683887	TraesCS2A02G292600/TraesCS2D02G290400	2	BP
GO:0070302	regulation of stress-activated protein kinase signaling cascade	2/3745	26/107890	0.227746	0.728721	0.683887	TraesCS6D02G276500/TraesCS2D02G480300	2	BP
GO:0098657	import into cell	2/3745	26/107890	0.227746	0.728721	0.683887	TraesCS6D02G286400/TraesCS4D02G147600	2	BP
GO:0098739	import across plasma membrane	2/3745	26/107890	0.227746	0.728721	0.683887	TraesCS6D02G286400/TraesCS4D02G147600	2	BP
GO:0048812	neuron projection morphogenesis	10/3745	218/107890	0.228174	0.728721	0.683887	TraesCS6D02G242400/TraesCS1D02G406300/TraesCS7A02G262700/TraesCS1B02G266200/TraesCS5B02G159100/TraesCS6B02G377200/TraesCS6B02G335200/TraesCS3D02G165500/TraesCS6B02G229900/TraesCS4D02G305100	10	BP
GO:0120039	plasma membrane bounded cell projection morphogenesis	10/3745	218/107890	0.228174	0.728721	0.683887	TraesCS6D02G242400/TraesCS1D02G406300/TraesCS7A02G262700/TraesCS1B02G266200/TraesCS5B02G159100/TraesCS6B02G377200/TraesCS6B02G335200/TraesCS3D02G165500/TraesCS6B02G229900/TraesCS4D02G305100	10	BP
GO:0019747	regulation of isoprenoid metabolic process	5/3745	94/107890	0.228211	0.728721	0.683887	TraesCS2B02G106500/TraesCS4B02G095400/TraesCS3A02G289900/TraesCS3D02G289600/TraesCS3B02G324500	5	BP
GO:0051648	vesicle localization	5/3745	94/107890	0.228211	0.728721	0.683887	TraesCS6D02G254300/TraesCS1B02G252100/TraesCS6B02G335200/TraesCS6B02G338000/TraesCS6B02G387300	5	BP
GO:0031503	protein-containing complex localization	18/3745	426/107890	0.229744	0.732726	0.687646	TraesCS6D02G311700/TraesCS6D02G213600/TraesCS6D02G341300/TraesCS6D02G266800/TraesCS3B02G487900/TraesCS6B02G083500/TraesCS1B02G266900/TraesCS1B02G270700/TraesCS1B02G063400/TraesCS1A02G246000/TraesCS6B02G373300/TraesCS6B02G456000/TraesCS6A02G309600/TraesCS6B02G337900/TraesCS6B02G391200/TraesCS6B02G363200/TraesCS6B02G239100/TraesCS6B02G461200	18	BP
GO:0006817	phosphate ion transport	15/3745	348/107890	0.231785	0.733649	0.688512	TraesCS7A02G231200/TraesCS6D02G187100/TraesCS6D02G191600/TraesCS6D02G364600/TraesCS2A02G169600/TraesCS7A02G263000/TraesCS7B02G478000/TraesCS1B02G415800/TraesCS2A02G380500/TraesCS2D02G376800/TraesCS2B02G397500/TraesCS6B02G236600/TraesCS6B02G224000/TraesCS4D02G245400/TraesCS6B02G418600	15	BP
GO:0006349	regulation of gene expression by genetic imprinting	3/3745	48/107890	0.232251	0.733649	0.688512	TraesCS4A02G372200/TraesCS7D02G069700/TraesCS7A02G074600	3	BP
GO:0010231	maintenance of seed dormancy	3/3745	48/107890	0.232251	0.733649	0.688512	TraesCS6D02G216600/TraesCS5B02G244000/TraesCS5D02G253400	3	BP
GO:0048640	negative regulation of developmental growth	3/3745	48/107890	0.232251	0.733649	0.688512	TraesCS3D02G163900/TraesCS3D02G164500/TraesCS3D02G220700	3	BP
GO:0051341	regulation of oxidoreductase activity	3/3745	48/107890	0.232251	0.733649	0.688512	TraesCS6D02G320800/TraesCS6D02G187100/TraesCS6B02G371500	3	BP
GO:0070979	protein K11-linked ubiquitination	3/3745	48/107890	0.232251	0.733649	0.688512	TraesCS6D02G233200/TraesCS6D02G327000/TraesCS6D02G354500	3	BP
GO:0097437	maintenance of dormancy	3/3745	48/107890	0.232251	0.733649	0.688512	TraesCS6D02G216600/TraesCS5B02G244000/TraesCS5D02G253400	3	BP
GO:0015718	monocarboxylic acid transport	10/3745	219/107890	0.232266	0.733649	0.688512	TraesCS6D02G187100/TraesCS3A02G218000/TraesCS3B02G248500/TraesCS3D02G234300/TraesCS5B02G157900/TraesCS7B02G292700/TraesCS6B02G224000/TraesCS7B02G262200/TraesCS7D02G386600/TraesCS4D02G217600	10	BP
GO:0006474	N-terminal protein amino acid acetylation	4/3745	72/107890	0.240283	0.749435	0.703327	TraesCS2A02G528900/TraesCS6B02G412200/TraesCS5D02G441800/TraesCS5B02G436800	4	BP
GO:0006949	syncytium formation	4/3745	72/107890	0.240283	0.749435	0.703327	TraesCS6D02G287100/TraesCS6D02G218500/TraesCS6B02G427000/TraesCS6B02G336500	4	BP
GO:0009068	aspartate family amino acid catabolic process	4/3745	72/107890	0.240283	0.749435	0.703327	TraesCS6D02G325100/TraesCS1B02G257300/TraesCS6B02G376200/TraesCS2D02G512000	4	BP
GO:0048858	cell projection morphogenesis	10/3745	221/107890	0.240532	0.749435	0.703327	TraesCS6D02G242400/TraesCS1D02G406300/TraesCS7A02G262700/TraesCS1B02G266200/TraesCS5B02G159100/TraesCS6B02G377200/TraesCS6B02G335200/TraesCS3D02G165500/TraesCS6B02G229900/TraesCS4D02G305100	10	BP
GO:0009235	cobalamin metabolic process	2/3745	27/107890	0.240699	0.749435	0.703327	TraesCS2A02G439900/TraesCS6B02G402400	2	BP
GO:0009236	cobalamin biosynthetic process	2/3745	27/107890	0.240699	0.749435	0.703327	TraesCS2A02G439900/TraesCS6B02G402400	2	BP
GO:0031990	mRNA export from nucleus in response to heat stress	2/3745	27/107890	0.240699	0.749435	0.703327	TraesCS6D02G266800/TraesCS6B02G083500	2	BP
GO:0051123	RNA polymerase II preinitiation complex assembly	2/3745	27/107890	0.240699	0.749435	0.703327	TraesCS6B02G376500/TraesCS6B02G341600	2	BP
GO:0052553	modulation by symbiont of host immune response	2/3745	27/107890	0.240699	0.749435	0.703327	TraesCS2A02G292600/TraesCS2D02G290400	2	BP
GO:0080111	DNA demethylation	2/3745	27/107890	0.240699	0.749435	0.703327	TraesCS7A02G215000/TraesCS7A02G215100	2	BP
GO:0097190	apoptotic signaling pathway	2/3745	27/107890	0.240699	0.749435	0.703327	TraesCS6D02G192000/TraesCS2A02G396400	2	BP
GO:0016358	dendrite development	3/3745	49/107890	0.241542	0.749435	0.703327	TraesCS3B02G146300/TraesCS6B02G335200/TraesCS7A02G419900	3	BP
GO:0034471	ncRNA 5'-end processing	3/3745	49/107890	0.241542	0.749435	0.703327	TraesCS6D02G272800/TraesCS4B02G140700/TraesCS3A02G209700	3	BP
GO:0050863	regulation of T cell activation	3/3745	49/107890	0.241542	0.749435	0.703327	TraesCS4B02G071600/TraesCS2D02G480300/TraesCS4D02G091500	3	BP
GO:1900377	negative regulation of secondary metabolite biosynthetic process	3/3745	49/107890	0.241542	0.749435	0.703327	TraesCS7A02G272100/TraesCS2A02G481500/TraesCS2B02G507700	3	BP
GO:0045927	positive regulation of growth	10/3745	222/107890	0.244705	0.758355	0.711698	TraesCS6D02G253600/TraesCS6D02G358000/TraesCS6D02G190000/TraesCS6D02G192000/TraesCS3D02G163900/TraesCS6B02G225700/TraesCS7B02G114200/TraesCS6B02G239500/TraesCS7B02G262100/TraesCS6B02G411500	10	BP
GO:0006270	DNA replication initiation	11/3745	248/107890	0.245732	0.760639	0.713842	TraesCS6D02G344100/TraesCS7A02G279000/TraesCS7A02G213600/TraesCS6D02G196000/TraesCS6D02G214400/TraesCS6D02G208400/TraesCS1B02G274600/TraesCS6B02G393500/TraesCS6B02G419000/TraesCS6B02G341400/TraesCS6B02G462700	11	BP
GO:0048586	regulation of long-day photoperiodism, flowering	5/3745	97/107890	0.247542	0.764441	0.71741	TraesCS7A02G218600/TraesCS6B02G113100/TraesCS7A02G263500/TraesCS6D02G267100/TraesCS7B02G009900	5	BP
GO:0051445	regulation of meiotic cell cycle	5/3745	97/107890	0.247542	0.764441	0.71741	TraesCS7A02G248700/TraesCS1B02G254400/TraesCS6B02G233700/TraesCS3D02G164600/TraesCS7B02G115400	5	BP
GO:0090056	regulation of chlorophyll metabolic process	4/3745	73/107890	0.247849	0.764493	0.717458	TraesCS6D02G183600/TraesCS4D02G225400/TraesCS4A02G063600/TraesCS6B02G233800	4	BP
GO:0010212	response to ionizing radiation	14/3745	327/107890	0.249012	0.766302	0.719156	TraesCS6D02G301000/TraesCS6D02G315400/TraesCS6D02G196000/TraesCS1B02G328200/TraesCS6B02G333700/TraesCS6B02G352000/TraesCS6B02G366400/TraesCS6B02G356900/TraesCS7A02G414700/TraesCS6B02G399000/TraesCS6B02G351900/TraesCS7B02G115400/TraesCS6B02G354700/TraesCS6B02G351800	14	BP
GO:0009682	induced systemic resistance	8/3745	172/107890	0.249302	0.766302	0.719156	TraesCS4D02G238200/TraesCS6D02G198800/TraesCS7A02G253800/TraesCS4B02G236700/TraesCS6B02G281000/TraesCS6A02G243300/TraesCS7B02G417700/TraesCS4D02G121300	8	BP
GO:0044247	cellular polysaccharide catabolic process	13/3745	301/107890	0.249626	0.766302	0.719156	TraesCS3A02G366300/TraesCS6D02G311400/TraesCS4B02G104500/TraesCS7D02G201000/TraesCS3D02G167100/TraesCS4B02G173200/TraesCS6B02G342600/TraesCS6A02G122100/TraesCS6A02G312400/TraesCS7A02G197900/TraesCS7B02G104600/TraesCS6B02G362900/TraesCS6B02G150300	13	BP
GO:0009952	anterior/posterior pattern specification	3/3745	50/107890	0.250891	0.766302	0.719156	TraesCS6B02G405200/TraesCS6B02G350800/TraesCS4D02G305100	3	BP
GO:0030168	platelet activation	3/3745	50/107890	0.250891	0.766302	0.719156	TraesCS5B02G155400/TraesCS3A02G205700/TraesCS5B02G155600	3	BP
GO:0052803	imidazole-containing compound metabolic process	3/3745	50/107890	0.250891	0.766302	0.719156	TraesCS6D02G252200/TraesCS6D02G255300/TraesCS1B02G261600	3	BP
GO:0071514	genetic imprinting	3/3745	50/107890	0.250891	0.766302	0.719156	TraesCS4A02G372200/TraesCS7D02G069700/TraesCS7A02G074600	3	BP
GO:0007033	vacuole organization	15/3745	354/107890	0.25145	0.766302	0.719156	TraesCS6D02G192900/TraesCS7A02G208300/TraesCS7A02G219100/TraesCS6D02G315600/TraesCS7B02G070300/TraesCS1B02G264000/TraesCS1B02G252100/TraesCS6D02G318000/TraesCS6B02G374700/TraesCS6B02G238500/TraesCS6B02G366600/TraesCS6B02G387300/TraesCS7A02G416800/TraesCS6B02G391400/TraesCS6B02G386200	15	BP
GO:0006729	tetrahydrobiopterin biosynthetic process	2/3745	28/107890	0.253684	0.766302	0.719156	TraesCS2D02G218400/TraesCS6B02G348200	2	BP
GO:0010117	photoprotection	2/3745	28/107890	0.253684	0.766302	0.719156	TraesCS7A02G282100/TraesCS4D02G077900	2	BP
GO:0010587	miRNA catabolic process	2/3745	28/107890	0.253684	0.766302	0.719156	TraesCS6D02G358000/TraesCS6B02G411500	2	BP
GO:0046146	tetrahydrobiopterin metabolic process	2/3745	28/107890	0.253684	0.766302	0.719156	TraesCS2D02G218400/TraesCS6B02G348200	2	BP
GO:0050769	positive regulation of neurogenesis	2/3745	28/107890	0.253684	0.766302	0.719156	TraesCS6D02G294500/TraesCS6B02G345700	2	BP
GO:0051709	regulation of killing of cells of other organism	2/3745	28/107890	0.253684	0.766302	0.719156	TraesCS2A02G292600/TraesCS2D02G290400	2	BP
GO:0051712	positive regulation of killing of cells of other organism	2/3745	28/107890	0.253684	0.766302	0.719156	TraesCS2A02G292600/TraesCS2D02G290400	2	BP
GO:0052042	positive regulation by symbiont of host programmed cell death	2/3745	28/107890	0.253684	0.766302	0.719156	TraesCS2A02G292600/TraesCS2D02G290400	2	BP
GO:0090307	mitotic spindle assembly	2/3745	28/107890	0.253684	0.766302	0.719156	TraesCS1A02G246000/TraesCS5B02G156500	2	BP
GO:2000069	regulation of post-embryonic root development	2/3745	28/107890	0.253684	0.766302	0.719156	TraesCS6D02G216400/TraesCS1B02G275600	2	BP
GO:0036065	fucosylation	4/3745	74/107890	0.255466	0.769913	0.722545	TraesCS6D02G300700/TraesCS6D02G300400/TraesCS6B02G351700/TraesCS6B02G350900	4	BP
GO:0055083	monovalent inorganic anion homeostasis	4/3745	74/107890	0.255466	0.769913	0.722545	TraesCS6D02G203800/TraesCS7A02G263000/TraesCS1B02G415800/TraesCS2B02G430000	4	BP
GO:0009911	positive regulation of flower development	14/3745	330/107890	0.25945	0.781024	0.732973	TraesCS6D02G232600/TraesCS6D02G211700/TraesCS6D02G236400/TraesCS6B02G113100/TraesCS1A02G199900/TraesCS3A02G432900/TraesCS3D02G427900/TraesCS2B02G300500/TraesCS7D02G261900/TraesCS3D02G428000/TraesCS7B02G158900/TraesCS6B02G335200/TraesCS6B02G348300/TraesCS6B02G237800	14	BP
GO:0000470	maturation of LSU-rRNA	5/3745	99/107890	0.260655	0.782858	0.734694	TraesCS7A02G278700/TraesCS7A02G266000/TraesCS6D02G269300/TraesCS7A02G261600/TraesCS1B02G254000	5	BP
GO:0042362	fat-soluble vitamin biosynthetic process	5/3745	99/107890	0.260655	0.782858	0.734694	TraesCS6D02G286900/TraesCS6D02G245200/TraesCS6D02G219600/TraesCS6B02G336300/TraesCS6B02G369300	5	BP
GO:0051225	spindle assembly	17/3745	410/107890	0.261322	0.783065	0.734888	TraesCS7A02G215000/TraesCS7A02G261300/TraesCS7D02G078500/TraesCS2B02G358500/TraesCS4B02G121600/TraesCS6A02G037600/TraesCS7A02G030400/TraesCS7D02G323200/TraesCS3D02G515700/TraesCS1A02G246000/TraesCSU02G037800/TraesCS6B02G447600/TraesCS6B02G356900/TraesCS5B02G156500/TraesCS6B02G451000/TraesCS2B02G429800/TraesCS2B02G429900	17	BP
GO:0046173	polyol biosynthetic process	12/3745	278/107890	0.261333	0.783065	0.734888	TraesCS6D02G199200/TraesCS6D02G287000/TraesCS6D02G379900/TraesCS6B02G246500/TraesCS6A02G216400/TraesCS7B02G093800/TraesCS2D02G218400/TraesCS1B02G274000/TraesCS1B02G278600/TraesCS6B02G336400/TraesCS6B02G434400/TraesCS6B02G348200	12	BP
GO:1901663	quinone biosynthetic process	10/3745	226/107890	0.261643	0.783065	0.734888	TraesCS7A02G235000/TraesCS6D02G219600/TraesCS6D02G239700/TraesCS6B02G165000/TraesCS1B02G266500/TraesCS2A02G523400/TraesCS6B02G430100/TraesCS2D02G525500/TraesCS6B02G333600/TraesCS2B02G553300	10	BP
GO:0061013	regulation of mRNA catabolic process	4/3745	75/107890	0.263129	0.783065	0.734888	TraesCS5B02G159400/TraesCS7B02G114200/TraesCS3A02G232500/TraesCS3D02G220700	4	BP
GO:0009788	negative regulation of abscisic acid-activated signaling pathway	8/3745	175/107890	0.263913	0.783065	0.734888	TraesCS1B02G441400/TraesCS6B02G338000/TraesCS3A02G209200/TraesCS5D02G144800/TraesCS3D02G161900/TraesCS3B02G371200/TraesCS3A02G339600/TraesCS4B02G120400	8	BP
GO:1901420	negative regulation of response to alcohol	8/3745	175/107890	0.263913	0.783065	0.734888	TraesCS1B02G441400/TraesCS6B02G338000/TraesCS3A02G209200/TraesCS5D02G144800/TraesCS3D02G161900/TraesCS3B02G371200/TraesCS3A02G339600/TraesCS4B02G120400	8	BP
GO:1905958	negative regulation of cellular response to alcohol	8/3745	175/107890	0.263913	0.783065	0.734888	TraesCS1B02G441400/TraesCS6B02G338000/TraesCS3A02G209200/TraesCS5D02G144800/TraesCS3D02G161900/TraesCS3B02G371200/TraesCS3A02G339600/TraesCS4B02G120400	8	BP
GO:0051168	nuclear export	19/3745	465/107890	0.266282	0.783065	0.734888	TraesCS7A02G262400/TraesCS6D02G311700/TraesCS6D02G213600/TraesCS6D02G341300/TraesCS6D02G266800/TraesCS3B02G487900/TraesCS6B02G083500/TraesCS1B02G266900/TraesCS1B02G270700/TraesCS1B02G063400/TraesCS2D02G480300/TraesCS6B02G373300/TraesCS6B02G456000/TraesCS6A02G309600/TraesCS6B02G337900/TraesCS6B02G391200/TraesCS6B02G363200/TraesCS4B02G173400/TraesCS6B02G239100	19	BP
GO:0000730	DNA recombinase assembly	2/3745	29/107890	0.266683	0.783065	0.734888	TraesCS6D02G315400/TraesCS6B02G366400	2	BP
GO:0001508	action potential	2/3745	29/107890	0.266683	0.783065	0.734888	TraesCS6B02G421000/TraesCS6B02G344100	2	BP
GO:0001907	killing by symbiont of host cells	2/3745	29/107890	0.266683	0.783065	0.734888	TraesCS2A02G292600/TraesCS2D02G290400	2	BP
GO:0006047	UDP-N-acetylglucosamine metabolic process	2/3745	29/107890	0.266683	0.783065	0.734888	TraesCS6B02G470000/TraesCS4D02G126400	2	BP
GO:0009211	pyrimidine deoxyribonucleoside triphosphate metabolic process	2/3745	29/107890	0.266683	0.783065	0.734888	TraesCS7B02G119100/TraesCS6B02G381500	2	BP
GO:0010810	regulation of cell-substrate adhesion	2/3745	29/107890	0.266683	0.783065	0.734888	TraesCS7A02G221500/TraesCS6B02G241000	2	BP
GO:0018023	peptidyl-lysine trimethylation	2/3745	29/107890	0.266683	0.783065	0.734888	TraesCS4D02G145700/TraesCS6B02G350800	2	BP
GO:0030705	cytoskeleton-dependent intracellular transport	2/3745	29/107890	0.266683	0.783065	0.734888	TraesCS5B02G159100/TraesCS6B02G461200	2	BP
GO:0042572	retinol metabolic process	2/3745	29/107890	0.266683	0.783065	0.734888	TraesCS4D02G351800/TraesCS4B02G358500	2	BP
GO:0048096	chromatin-mediated maintenance of transcription	2/3745	29/107890	0.266683	0.783065	0.734888	TraesCS7A02G114000/TraesCS7D02G109300	2	BP
GO:0052572	response to host immune response	2/3745	29/107890	0.266683	0.783065	0.734888	TraesCS2A02G292600/TraesCS2D02G290400	2	BP
GO:0090735	DNA repair complex assembly	2/3745	29/107890	0.266683	0.783065	0.734888	TraesCS6D02G315400/TraesCS6B02G366400	2	BP
GO:0010155	regulation of proton transport	13/3745	306/107890	0.267901	0.785314	0.736998	TraesCS6D02G202000/TraesCS7A02G282100/TraesCS6D02G202300/TraesCS6D02G274600/TraesCS6D02G275700/TraesCS6D02G239700/TraesCS6D02G227700/TraesCS6B02G390600/TraesCS1B02G266500/TraesCS5B02G155200/TraesCS6B02G352700/TraesCS6B02G454500/TraesCS7A02G414600	13	BP
GO:0042181	ketone biosynthetic process	12/3745	280/107890	0.269058	0.785314	0.736998	TraesCS7A02G235000/TraesCS6D02G219600/TraesCS6D02G239700/TraesCS6B02G165000/TraesCS7A02G093900/TraesCS1B02G266500/TraesCS2A02G523400/TraesCS6B02G430100/TraesCS2B02G558400/TraesCS2D02G525500/TraesCS6B02G333600/TraesCS2B02G553300	12	BP
GO:0006097	glyoxylate cycle	3/3745	52/107890	0.269737	0.785314	0.736998	TraesCS7A02G219100/TraesCS2B02G244600/TraesCS6B02G440200	3	BP
GO:0019674	NAD metabolic process	3/3745	52/107890	0.269737	0.785314	0.736998	TraesCS2D02G408700/TraesCS1B02G253900/TraesCS2B02G430000	3	BP
GO:0040020	regulation of meiotic nuclear division	3/3745	52/107890	0.269737	0.785314	0.736998	TraesCS7A02G248700/TraesCS1B02G254400/TraesCS7B02G115400	3	BP
GO:0009294	DNA mediated transformation	9/3745	202/107890	0.269992	0.785314	0.736998	TraesCS4A02G372200/TraesCS7D02G069700/TraesCS7A02G074600/TraesCS1A02G308300/TraesCS6B02G413400/TraesCS6B02G419000/TraesCS7A02G414500/TraesCS7B02G261800/TraesCS6B02G419400	9	BP
GO:0000291	nuclear-transcribed mRNA catabolic process, exonucleolytic	4/3745	76/107890	0.270834	0.785314	0.736998	TraesCS6D02G298400/TraesCS1B02G254400/TraesCS2A02G528800/TraesCS6B02G349400	4	BP
GO:1901401	regulation of tetrapyrrole metabolic process	4/3745	76/107890	0.270834	0.785314	0.736998	TraesCS6D02G183600/TraesCS4D02G225400/TraesCS4A02G063600/TraesCS6B02G233800	4	BP
GO:0009225	nucleotide-sugar metabolic process	7/3745	151/107890	0.271735	0.785314	0.736998	TraesCS6D02G323500/TraesCS5D02G404300/TraesCS6B02G470000/TraesCS7A02G419300/TraesCS2D02G111400/TraesCS4D02G126400/TraesCS2B02G129600	7	BP
GO:0051052	regulation of DNA metabolic process	14/3745	334/107890	0.273605	0.785314	0.736998	TraesCS6D02G378100/TraesCS6D02G315400/TraesCS6D02G196000/TraesCS4A02G372200/TraesCS7D02G069700/TraesCS1B02G328200/TraesCS7A02G074600/TraesCS2D02G339900/TraesCS6B02G333700/TraesCS6B02G366400/TraesCS6B02G356900/TraesCS6B02G399000/TraesCS6B02G351900/TraesCS6B02G432500	14	BP
GO:0071901	negative regulation of protein serine/threonine kinase activity	6/3745	126/107890	0.273684	0.785314	0.736998	TraesCS6D02G263500/TraesCS6D02G301100/TraesCS6B02G352100/TraesCS6B02G345300/TraesCS5B02G159300/TraesCS5D02G247100	6	BP
GO:0010072	primary shoot apical meristem specification	8/3745	177/107890	0.273791	0.785314	0.736998	TraesCS6D02G359000/TraesCS6D02G186900/TraesCS1B02G238200/TraesCS6B02G223700/TraesCS6B02G356900/TraesCS6B02G412000/TraesCS6B02G466700/TraesCS3A02G210100	8	BP
GO:0007420	brain development	5/3745	101/107890	0.273924	0.785314	0.736998	TraesCS7A02G227400/TraesCS7A02G262700/TraesCS6B02G452200/TraesCS2B02G429300/TraesCS7A02G418100	5	BP
GO:0007600	sensory perception	5/3745	101/107890	0.273924	0.785314	0.736998	TraesCS7A02G248400/TraesCS4D02G351800/TraesCS2D02G480300/TraesCS4B02G358500/TraesCS3D02G369700	5	BP
GO:0051249	regulation of lymphocyte activation	5/3745	101/107890	0.273924	0.785314	0.736998	TraesCS4B02G071600/TraesCS2D02G480300/TraesCS6B02G452200/TraesCS4D02G091500/TraesCS5D02G479300	5	BP
GO:0070507	regulation of microtubule cytoskeleton organization	5/3745	101/107890	0.273924	0.785314	0.736998	TraesCS1B02G267200/TraesCS3D02G164500/TraesCS5D02G184300/TraesCS5A02G179700/TraesCS5B02G177500	5	BP
GO:0000724	double-strand break repair via homologous recombination	15/3745	361/107890	0.275153	0.785314	0.736998	TraesCS6D02G301000/TraesCS6D02G315400/TraesCS6D02G304300/TraesCS6D02G235600/TraesCS7A02G213600/TraesCS6D02G196000/TraesCS6D02G214400/TraesCS4D02G133500/TraesCS6B02G354900/TraesCS6B02G352000/TraesCS6B02G366400/TraesCS3D02G165900/TraesCS6B02G351900/TraesCS6B02G462700/TraesCS6B02G351800	15	BP
GO:0030522	intracellular receptor signaling pathway	7/3745	152/107890	0.277126	0.785314	0.736998	TraesCS6D02G294500/TraesCS6D02G187200/TraesCS6D02G211700/TraesCS5B02G155200/TraesCS6B02G345700/TraesCS6B02G224100/TraesCS6B02G237800	7	BP
GO:0048574	long-day photoperiodism, flowering	7/3745	152/107890	0.277126	0.785314	0.736998	TraesCS7A02G218600/TraesCS6D02G241900/TraesCS6B02G113100/TraesCS7A02G263500/TraesCS6D02G267100/TraesCS7B02G009900/TraesCS3B02G151500	7	BP
GO:1902275	regulation of chromatin organization	7/3745	152/107890	0.277126	0.785314	0.736998	TraesCS6D02G196000/TraesCS4A02G372200/TraesCS7D02G069700/TraesCS7A02G074600/TraesCS4D02G145700/TraesCS6B02G350800/TraesCS7B02G175400	7	BP
GO:0007173	epidermal growth factor receptor signaling pathway	3/3745	53/107890	0.279219	0.785314	0.736998	TraesCS6D02G336200/TraesCS6B02G386600/TraesCS7A02G191700	3	BP
GO:0038127	ERBB signaling pathway	3/3745	53/107890	0.279219	0.785314	0.736998	TraesCS6D02G336200/TraesCS6B02G386600/TraesCS7A02G191700	3	BP
GO:0071025	RNA surveillance	3/3745	53/107890	0.279219	0.785314	0.736998	TraesCS6D02G334300/TraesCS6D02G334800/TraesCS6D02G334500	3	BP
GO:0001654	eye development	6/3745	127/107890	0.279632	0.785314	0.736998	TraesCS6D02G195300/TraesCS6D02G302200/TraesCS6B02G377200/TraesCS6B02G335200/TraesCS6B02G353100/TraesCS4D02G305100	6	BP
GO:0048880	sensory system development	6/3745	127/107890	0.279632	0.785314	0.736998	TraesCS6D02G195300/TraesCS6D02G302200/TraesCS6B02G377200/TraesCS6B02G335200/TraesCS6B02G353100/TraesCS4D02G305100	6	BP
GO:0150063	visual system development	6/3745	127/107890	0.279632	0.785314	0.736998	TraesCS6D02G195300/TraesCS6D02G302200/TraesCS6B02G377200/TraesCS6B02G335200/TraesCS6B02G353100/TraesCS4D02G305100	6	BP
GO:0006878	cellular copper ion homeostasis	2/3745	30/107890	0.279679	0.785314	0.736998	TraesCS7A02G239900/TraesCS6B02G393800	2	BP
GO:0036465	synaptic vesicle recycling	2/3745	30/107890	0.279679	0.785314	0.736998	TraesCS1B02G252100/TraesCS6B02G342500	2	BP
GO:0043157	response to cation stress	2/3745	30/107890	0.279679	0.785314	0.736998	TraesCS6D02G358000/TraesCS6B02G411500	2	BP
GO:0045038	protein import into chloroplast thylakoid membrane	2/3745	30/107890	0.279679	0.785314	0.736998	TraesCS4B02G117900/TraesCS4B02G117800	2	BP
GO:0048488	synaptic vesicle endocytosis	2/3745	30/107890	0.279679	0.785314	0.736998	TraesCS1B02G252100/TraesCS6B02G342500	2	BP
GO:0050730	regulation of peptidyl-tyrosine phosphorylation	2/3745	30/107890	0.279679	0.785314	0.736998	TraesCS6D02G336200/TraesCS6B02G386600	2	BP
GO:0071219	cellular response to molecule of bacterial origin	2/3745	30/107890	0.279679	0.785314	0.736998	TraesCS3D02G164500/TraesCS6B02G350800	2	BP
GO:0140238	presynaptic endocytosis	2/3745	30/107890	0.279679	0.785314	0.736998	TraesCS1B02G252100/TraesCS6B02G342500	2	BP
GO:2000037	regulation of stomatal complex patterning	2/3745	30/107890	0.279679	0.785314	0.736998	TraesCS6D02G328800/TraesCS6B02G379500	2	BP
GO:0009785	blue light signaling pathway	5/3745	102/107890	0.280611	0.785314	0.736998	TraesCS6D02G187200/TraesCS6D02G211700/TraesCS5B02G155200/TraesCS6B02G224100/TraesCS6B02G237800	5	BP
GO:0051056	regulation of small GTPase mediated signal transduction	10/3745	231/107890	0.283324	0.785314	0.736998	TraesCS7A02G270600/TraesCS7A02G263800/TraesCS6D02G204700/TraesCS4B02G140700/TraesCS6B02G456300/TraesCS6B02G377200/TraesCS6B02G335200/TraesCS6B02G415900/TraesCS6B02G228600/TraesCS4B02G175500	10	BP
GO:0042558	pteridine-containing compound metabolic process	8/3745	179/107890	0.283769	0.785314	0.736998	TraesCS6D02G181700/TraesCS7A02G276800/TraesCS7A02G276900/TraesCS2D02G218400/TraesCS6B02G230200/TraesCS3D02G167700/TraesCS6B02G348200/TraesCS2B02G337100	8	BP
GO:0009292	genetic transfer	9/3745	205/107890	0.28391	0.785314	0.736998	TraesCS4A02G372200/TraesCS7D02G069700/TraesCS7A02G074600/TraesCS1A02G308300/TraesCS6B02G413400/TraesCS6B02G419000/TraesCS7A02G414500/TraesCS7B02G261800/TraesCS6B02G419400	9	BP
GO:0007265	Ras protein signal transduction	14/3745	337/107890	0.284387	0.785314	0.736998	TraesCS7A02G270600/TraesCS7A02G263800/TraesCS6D02G217700/TraesCS6D02G204700/TraesCS1B02G266200/TraesCS6B02G456300/TraesCS6B02G377200/TraesCS6B02G335200/TraesCS1D02G163000/TraesCS3D02G166900/TraesCS6B02G415900/TraesCS6B02G228600/TraesCS6B02G414700/TraesCS4B02G175500	14	BP
GO:0006521	regulation of cellular amino acid metabolic process	6/3745	128/107890	0.285608	0.785314	0.736998	TraesCS6D02G195300/TraesCS6D02G335000/TraesCS6D02G251700/TraesCS7A02G261700/TraesCS6B02G385200/TraesCS6B02G226200	6	BP
GO:0006525	arginine metabolic process	6/3745	128/107890	0.285608	0.785314	0.736998	TraesCS6D02G251000/TraesCS1B02G257300/TraesCS5B02G154400/TraesCS3A02G206600/TraesCS1D02G012300/TraesCS6B02G274800	6	BP
GO:0070588	calcium ion transmembrane transport	6/3745	128/107890	0.285608	0.785314	0.736998	TraesCS6D02G204000/TraesCS1B02G248000/TraesCSU02G140000/TraesCS6B02G344100/TraesCS2D02G356300/TraesCS6B02G250200	6	BP
GO:0043484	regulation of RNA splicing	5/3745	103/107890	0.28733	0.785314	0.736998	TraesCS7A02G234600/TraesCS1B02G252100/TraesCS4A02G091300/TraesCS4B02G213400/TraesCS4D02G214100	5	BP
GO:0048439	flower morphogenesis	14/3745	338/107890	0.28801	0.785314	0.736998	TraesCS7A02G248500/TraesCS7A02G211100/TraesCS7A02G263800/TraesCS7A02G236400/TraesCS7A02G270900/TraesCS6D02G361900/TraesCS6D02G269400/TraesCS6D02G208400/TraesCS4A02G362100/TraesCS3D02G162700/TraesCS6B02G472100/TraesCS6B02G466700/TraesCS6B02G414700/TraesCS4D02G120400	14	BP
GO:0015743	malate transport	3/3745	54/107890	0.288732	0.785314	0.736998	TraesCS7A02G208700/TraesCS7A02G220200/TraesCS7A02G244400	3	BP
GO:0016973	poly(A)+ mRNA export from nucleus	3/3745	54/107890	0.288732	0.785314	0.736998	TraesCS1B02G063400/TraesCS6A02G309600/TraesCS6B02G239100	3	BP
GO:0048268	clathrin coat assembly	3/3745	54/107890	0.288732	0.785314	0.736998	TraesCS5B02G239400/TraesCS5B02G152300/TraesCS6B02G407500	3	BP
GO:0010152	pollen maturation	6/3745	129/107890	0.291611	0.785314	0.736998	TraesCS6D02G294600/TraesCS6D02G186900/TraesCS6B02G223700/TraesCS6B02G364000/TraesCS5B02G158800/TraesCS6B02G345800	6	BP
GO:0006313	transposition, DNA-mediated	2/3745	31/107890	0.292656	0.785314	0.736998	TraesCS6B02G337500/TraesCS6A02G308700	2	BP
GO:0007189	adenylate cyclase-activating G protein-coupled receptor signaling pathway	2/3745	31/107890	0.292656	0.785314	0.736998	TraesCS4B02G173700/TraesCS6B02G229000	2	BP
GO:0009263	deoxyribonucleotide biosynthetic process	2/3745	31/107890	0.292656	0.785314	0.736998	TraesCS6D02G357100/TraesCS6B02G410800	2	BP
GO:0010160	formation of animal organ boundary	2/3745	31/107890	0.292656	0.785314	0.736998	TraesCS4A02G067300/TraesCS4D02G225200	2	BP
GO:0031119	tRNA pseudouridine synthesis	2/3745	31/107890	0.292656	0.785314	0.736998	TraesCS6D02G234300/TraesCS7A02G252400	2	BP
GO:0031343	positive regulation of cell killing	2/3745	31/107890	0.292656	0.785314	0.736998	TraesCS2A02G292600/TraesCS2D02G290400	2	BP
GO:0032260	response to jasmonic acid stimulus involved in jasmonic acid and ethylene-dependent systemic resistance	2/3745	31/107890	0.292656	0.785314	0.736998	TraesCS2D02G037300/TraesCS6B02G358000	2	BP
GO:0034508	centromere complex assembly	2/3745	31/107890	0.292656	0.785314	0.736998	TraesCS6D02G207900/TraesCS1A02G246000	2	BP
GO:0044068	modulation by symbiont of host cellular process	2/3745	31/107890	0.292656	0.785314	0.736998	TraesCS2A02G292600/TraesCS2D02G290400	2	BP
GO:0052040	modulation by symbiont of host programmed cell death	2/3745	31/107890	0.292656	0.785314	0.736998	TraesCS2A02G292600/TraesCS2D02G290400	2	BP
GO:0099003	vesicle-mediated transport in synapse	2/3745	31/107890	0.292656	0.785314	0.736998	TraesCS1B02G252100/TraesCS6B02G342500	2	BP
GO:0099504	synaptic vesicle cycle	2/3745	31/107890	0.292656	0.785314	0.736998	TraesCS1B02G252100/TraesCS6B02G342500	2	BP
GO:1901989	positive regulation of cell cycle phase transition	2/3745	31/107890	0.292656	0.785314	0.736998	TraesCS7B02G216700/TraesCS7D02G312700	2	BP
GO:1901992	positive regulation of mitotic cell cycle phase transition	2/3745	31/107890	0.292656	0.785314	0.736998	TraesCS7B02G216700/TraesCS7D02G312700	2	BP
GO:0071166	ribonucleoprotein complex localization	16/3745	393/107890	0.293108	0.785314	0.736998	TraesCS6D02G311700/TraesCS6D02G213600/TraesCS6D02G341300/TraesCS6D02G266800/TraesCS3B02G487900/TraesCS6B02G083500/TraesCS1B02G266900/TraesCS1B02G270700/TraesCS1B02G063400/TraesCS6B02G373300/TraesCS6B02G456000/TraesCS6A02G309600/TraesCS6B02G337900/TraesCS6B02G391200/TraesCS6B02G363200/TraesCS6B02G239100	16	BP
GO:0071426	ribonucleoprotein complex export from nucleus	16/3745	393/107890	0.293108	0.785314	0.736998	TraesCS6D02G311700/TraesCS6D02G213600/TraesCS6D02G341300/TraesCS6D02G266800/TraesCS3B02G487900/TraesCS6B02G083500/TraesCS1B02G266900/TraesCS1B02G270700/TraesCS1B02G063400/TraesCS6B02G373300/TraesCS6B02G456000/TraesCS6A02G309600/TraesCS6B02G337900/TraesCS6B02G391200/TraesCS6B02G363200/TraesCS6B02G239100	16	BP
GO:0046649	lymphocyte activation	7/3745	155/107890	0.293454	0.785314	0.736998	TraesCS6D02G270300/TraesCS4B02G071600/TraesCS2D02G480300/TraesCS6B02G344100/TraesCS6B02G452200/TraesCS4D02G091500/TraesCS5D02G479300	7	BP
GO:0032483	regulation of Rab protein signal transduction	4/3745	79/107890	0.294164	0.785314	0.736998	TraesCS7A02G270600/TraesCS6D02G204700/TraesCS6B02G377200/TraesCS6B02G415900	4	BP
GO:0032776	DNA methylation on cytosine	4/3745	79/107890	0.294164	0.785314	0.736998	TraesCS6D02G266800/TraesCS2D02G218400/TraesCS6B02G419000/TraesCS6B02G369700	4	BP
GO:0000913	preprophase band assembly	1/3745	10/107890	0.29763	0.785314	0.736998	TraesCS5B02G155000	1	BP
GO:0000957	mitochondrial RNA catabolic process	1/3745	10/107890	0.29763	0.785314	0.736998	TraesCS6D02G206900	1	BP
GO:0001682	tRNA 5'-leader removal	1/3745	10/107890	0.29763	0.785314	0.736998	TraesCS4B02G140700	1	BP
GO:0006428	isoleucyl-tRNA aminoacylation	1/3745	10/107890	0.29763	0.785314	0.736998	TraesCS6B02G367200	1	BP
GO:0006651	diacylglycerol biosynthetic process	1/3745	10/107890	0.29763	0.785314	0.736998	TraesCS6D02G252100	1	BP
GO:0007259	receptor signaling pathway via JAK-STAT	1/3745	10/107890	0.29763	0.785314	0.736998	TraesCS6B02G350800	1	BP
GO:0007270	neuron-neuron synaptic transmission	1/3745	10/107890	0.29763	0.785314	0.736998	TraesCS6D02G349100	1	BP
GO:0010352	lithium ion export across the plasma membrane	1/3745	10/107890	0.29763	0.785314	0.736998	TraesCS2D02G135600	1	BP
GO:0031054	pre-miRNA processing	1/3745	10/107890	0.29763	0.785314	0.736998	TraesCS4B02G118400	1	BP
GO:0031117	positive regulation of microtubule depolymerization	1/3745	10/107890	0.29763	0.785314	0.736998	TraesCS3D02G164500	1	BP
GO:0032400	melanosome localization	1/3745	10/107890	0.29763	0.785314	0.736998	TraesCS6B02G387300	1	BP
GO:0034433	steroid esterification	1/3745	10/107890	0.29763	0.785314	0.736998	TraesCS6B02G330300	1	BP
GO:0034434	sterol esterification	1/3745	10/107890	0.29763	0.785314	0.736998	TraesCS6B02G330300	1	BP
GO:0035987	endodermal cell differentiation	1/3745	10/107890	0.29763	0.785314	0.736998	TraesCS6B02G350800	1	BP
GO:0040025	vulval development	1/3745	10/107890	0.29763	0.785314	0.736998	TraesCS3D02G163900	1	BP
GO:0040027	negative regulation of vulval development	1/3745	10/107890	0.29763	0.785314	0.736998	TraesCS3D02G163900	1	BP
GO:0040028	regulation of vulval development	1/3745	10/107890	0.29763	0.785314	0.736998	TraesCS3D02G163900	1	BP
GO:0042779	tRNA 3'-trailer cleavage	1/3745	10/107890	0.29763	0.785314	0.736998	TraesCS3D02G163900	1	BP
GO:0043276	anoikis	1/3745	10/107890	0.29763	0.785314	0.736998	TraesCS6B02G417700	1	BP
GO:0048069	eye pigmentation	1/3745	10/107890	0.29763	0.785314	0.736998	TraesCS1B02G252100	1	BP
GO:0048704	embryonic skeletal system morphogenesis	1/3745	10/107890	0.29763	0.785314	0.736998	TraesCS4D02G126400	1	BP
GO:0048708	astrocyte differentiation	1/3745	10/107890	0.29763	0.785314	0.736998	TraesCS6B02G421000	1	BP
GO:0051875	pigment granule localization	1/3745	10/107890	0.29763	0.785314	0.736998	TraesCS6B02G387300	1	BP
GO:0055064	chloride ion homeostasis	1/3745	10/107890	0.29763	0.785314	0.736998	TraesCS6D02G203800	1	BP
GO:0060401	cytosolic calcium ion transport	1/3745	10/107890	0.29763	0.785314	0.736998	TraesCS6B02G344100	1	BP
GO:0060402	calcium ion transport into cytosol	1/3745	10/107890	0.29763	0.785314	0.736998	TraesCS6B02G344100	1	BP
GO:0061064	negative regulation of nematode larval development	1/3745	10/107890	0.29763	0.785314	0.736998	TraesCS3D02G163900	1	BP
GO:0071586	CAAX-box protein processing	1/3745	10/107890	0.29763	0.785314	0.736998	TraesCS6D02G239500	1	BP
GO:0080120	CAAX-box protein maturation	1/3745	10/107890	0.29763	0.785314	0.736998	TraesCS6D02G239500	1	BP
GO:0097696	receptor signaling pathway via STAT	1/3745	10/107890	0.29763	0.785314	0.736998	TraesCS6B02G350800	1	BP
GO:0099116	tRNA 5'-end processing	1/3745	10/107890	0.29763	0.785314	0.736998	TraesCS4B02G140700	1	BP
GO:1990481	mRNA pseudouridine synthesis	1/3745	10/107890	0.29763	0.785314	0.736998	TraesCS6D02G234300	1	BP
GO:2000209	regulation of anoikis	1/3745	10/107890	0.29763	0.785314	0.736998	TraesCS6B02G417700	1	BP
GO:0051307	meiotic chromosome separation	3/3745	55/107890	0.298267	0.785416	0.737094	TraesCS6B02G356900/TraesCS4D02G106800/TraesCS6B02G265900	3	BP
GO:0090596	sensory organ morphogenesis	3/3745	55/107890	0.298267	0.785416	0.737094	TraesCS6B02G377200/TraesCS6B02G335200/TraesCS4D02G305100	3	BP
GO:0030865	cortical cytoskeleton organization	4/3745	80/107890	0.301998	0.794446	0.745569	TraesCS5B02G155000/TraesCS3D02G164500/TraesCS6B02G226200/TraesCS4B02G173200	4	BP
GO:0045860	positive regulation of protein kinase activity	15/3745	369/107890	0.303111	0.795167	0.746245	TraesCS6D02G332100/TraesCS6D02G328800/TraesCS5B02G154600/TraesCS4B02G116000/TraesCS6B02G362300/TraesCS6B02G226200/TraesCS4B02G115800/TraesCS6B02G382700/TraesCS6B02G352700/TraesCS6B02G379500/TraesCS5D02G184300/TraesCS6B02G358800/TraesCS5A02G179700/TraesCS1B02G375400/TraesCS5B02G177500	15	BP
GO:0006611	protein export from nucleus	17/3745	423/107890	0.303317	0.795167	0.746245	TraesCS7A02G262400/TraesCS6D02G311700/TraesCS6D02G213600/TraesCS6D02G341300/TraesCS6D02G266800/TraesCS3B02G487900/TraesCS6B02G083500/TraesCS1B02G266900/TraesCS1B02G270700/TraesCS1B02G063400/TraesCS6B02G373300/TraesCS6B02G456000/TraesCS6A02G309600/TraesCS6B02G337900/TraesCS6B02G391200/TraesCS6B02G363200/TraesCS6B02G239100	17	BP
GO:0042761	very long-chain fatty acid biosynthetic process	6/3745	131/107890	0.303693	0.795167	0.746245	TraesCS6D02G193600/TraesCS7A02G221300/TraesCS7A02G221500/TraesCS5A02G268900/TraesCS6B02G241000/TraesCS6B02G239400	6	BP
GO:0051302	regulation of cell division	10/3745	236/107890	0.30549	0.795167	0.746245	TraesCS6D02G195300/TraesCS6D02G216400/TraesCS6D02G233200/TraesCS6D02G354500/TraesCS1B02G275600/TraesCS6B02G366900/TraesCS6B02G233700/TraesCS5B02G244000/TraesCS5D02G253400/TraesCS6B02G407600	10	BP
GO:0010453	regulation of cell fate commitment	2/3745	32/107890	0.305601	0.795167	0.746245	TraesCS7A02G068000/TraesCS7D02G062100	2	BP
GO:0031341	regulation of cell killing	2/3745	32/107890	0.305601	0.795167	0.746245	TraesCS2A02G292600/TraesCS2D02G290400	2	BP
GO:0034427	nuclear-transcribed mRNA catabolic process, exonucleolytic, 3'-5'	2/3745	32/107890	0.305601	0.795167	0.746245	TraesCS6D02G298400/TraesCS6B02G349400	2	BP
GO:0046416	D-amino acid metabolic process	2/3745	32/107890	0.305601	0.795167	0.746245	TraesCS6B02G354300/TraesCS2B02G429300	2	BP
GO:0052173	response to defenses of other organism	2/3745	32/107890	0.305601	0.795167	0.746245	TraesCS2A02G292600/TraesCS2D02G290400	2	BP
GO:0052200	response to host defenses	2/3745	32/107890	0.305601	0.795167	0.746245	TraesCS2A02G292600/TraesCS2D02G290400	2	BP
GO:0075136	response to host	2/3745	32/107890	0.305601	0.795167	0.746245	TraesCS2A02G292600/TraesCS2D02G290400	2	BP
GO:0006563	L-serine metabolic process	5/3745	106/107890	0.307649	0.798565	0.749435	TraesCS3A02G287400/TraesCS3A02G209500/TraesCS5D02G396300/TraesCS5A02G386500/TraesCS2B02G429300	5	BP
GO:0045037	protein import into chloroplast stroma	3/3745	56/107890	0.307818	0.798565	0.749435	TraesCS6D02G183600/TraesCS6D02G205400/TraesCS6B02G233800	3	BP
GO:0048639	positive regulation of developmental growth	3/3745	56/107890	0.307818	0.798565	0.749435	TraesCS6D02G358000/TraesCS7B02G114200/TraesCS6B02G411500	3	BP
GO:0010227	floral organ abscission	8/3745	184/107890	0.309097	0.801093	0.751807	TraesCS6D02G186900/TraesCS7A02G236400/TraesCS6D02G328800/TraesCS4D02G329400/TraesCS4A02G362100/TraesCS6B02G223700/TraesCS6B02G379500/TraesCS4D02G120400	8	BP
GO:0035725	sodium ion transmembrane transport	4/3745	81/107890	0.309856	0.802268	0.75291	TraesCS7A02G244400/TraesCS7A02G242300/TraesCS4D02G146900/TraesCS4D02G147600	4	BP
GO:0048447	sepal morphogenesis	12/3745	291/107890	0.312766	0.80816	0.758439	TraesCS7A02G245400/TraesCS6D02G304300/TraesCS6D02G356500/TraesCS6D02G208400/TraesCS1B02G252400/TraesCS6B02G354900/TraesCS6B02G333400/TraesCS7B02G175400/TraesCS6B02G233400/TraesCS6B02G410200/TraesCS4B02G118300/TraesCS5B02G158100	12	BP
GO:0048453	sepal formation	12/3745	291/107890	0.312766	0.80816	0.758439	TraesCS7A02G245400/TraesCS6D02G304300/TraesCS6D02G356500/TraesCS6D02G208400/TraesCS1B02G252400/TraesCS6B02G354900/TraesCS6B02G333400/TraesCS7B02G175400/TraesCS6B02G233400/TraesCS6B02G410200/TraesCS4B02G118300/TraesCS5B02G158100	12	BP
GO:0060322	head development	5/3745	107/107890	0.314468	0.80816	0.758439	TraesCS7A02G227400/TraesCS7A02G262700/TraesCS6B02G452200/TraesCS2B02G429300/TraesCS7A02G418100	5	BP
GO:0045597	positive regulation of cell differentiation	6/3745	133/107890	0.315861	0.80816	0.758439	TraesCS6D02G294500/TraesCS6D02G379500/TraesCS6B02G345700/TraesCS6B02G403400/TraesCS7A02G068000/TraesCS7D02G062100	6	BP
GO:0032482	Rab protein signal transduction	4/3745	82/107890	0.317733	0.80816	0.758439	TraesCS7A02G270600/TraesCS6D02G204700/TraesCS6B02G377200/TraesCS6B02G415900	4	BP
GO:0031053	primary miRNA processing	2/3745	33/107890	0.318499	0.80816	0.758439	TraesCS6D02G203100/TraesCS4B02G118400	2	BP
GO:0035510	DNA dealkylation	2/3745	33/107890	0.318499	0.80816	0.758439	TraesCS7A02G215000/TraesCS7A02G215100	2	BP
GO:0044782	cilium organization	2/3745	33/107890	0.318499	0.80816	0.758439	TraesCS6D02G396300/TraesCS6B02G461200	2	BP
GO:0051353	positive regulation of oxidoreductase activity	2/3745	33/107890	0.318499	0.80816	0.758439	TraesCS6D02G320800/TraesCS6B02G371500	2	BP
GO:0051962	positive regulation of nervous system development	2/3745	33/107890	0.318499	0.80816	0.758439	TraesCS6D02G294500/TraesCS6B02G345700	2	BP
GO:0032507	maintenance of protein location in cell	6/3745	134/107890	0.321974	0.80816	0.758439	TraesCS7A02G271400/TraesCS6D02G241800/TraesCS1B02G252700/TraesCS6B02G224600/TraesCS6B02G417700/TraesCS5B02G155000	6	BP
GO:0006148	inosine catabolic process	1/3745	11/107890	0.322013	0.80816	0.758439	TraesCS7B02G176500	1	BP
GO:0006336	DNA replication-independent nucleosome assembly	1/3745	11/107890	0.322013	0.80816	0.758439	TraesCS1A02G246000	1	BP
GO:0006557	S-adenosylmethioninamine biosynthetic process	1/3745	11/107890	0.322013	0.80816	0.758439	TraesCS6D02G202500	1	BP
GO:0007063	regulation of sister chromatid cohesion	1/3745	11/107890	0.322013	0.80816	0.758439	TraesCS6B02G356900	1	BP
GO:0007606	sensory perception of chemical stimulus	1/3745	11/107890	0.322013	0.80816	0.758439	TraesCS2D02G480300	1	BP
GO:0010376	stomatal complex formation	1/3745	11/107890	0.322013	0.80816	0.758439	TraesCS7A02G248700	1	BP
GO:0010425	DNA methylation on cytosine within a CNG sequence	1/3745	11/107890	0.322013	0.80816	0.758439	TraesCS6B02G419000	1	BP
GO:0016480	negative regulation of transcription by RNA polymerase III	1/3745	11/107890	0.322013	0.80816	0.758439	TraesCS4D02G136700	1	BP
GO:0018996	molting cycle, collagen and cuticulin-based cuticle	1/3745	11/107890	0.322013	0.80816	0.758439	TraesCS6D02G253600	1	BP
GO:0034501	protein localization to kinetochore	1/3745	11/107890	0.322013	0.80816	0.758439	TraesCS6D02G207900	1	BP
GO:0035524	proline transmembrane transport	1/3745	11/107890	0.322013	0.80816	0.758439	TraesCS4B02G139700	1	BP
GO:0042791	5S class rRNA transcription by RNA polymerase III	1/3745	11/107890	0.322013	0.80816	0.758439	TraesCS6D02G213900	1	BP
GO:0046499	S-adenosylmethioninamine metabolic process	1/3745	11/107890	0.322013	0.80816	0.758439	TraesCS6D02G202500	1	BP
GO:0051382	kinetochore assembly	1/3745	11/107890	0.322013	0.80816	0.758439	TraesCS6D02G207900	1	BP
GO:0051383	kinetochore organization	1/3745	11/107890	0.322013	0.80816	0.758439	TraesCS6D02G207900	1	BP
GO:0051409	response to nitrosative stress	1/3745	11/107890	0.322013	0.80816	0.758439	TraesCS6B02G425700	1	BP
GO:0061062	regulation of nematode larval development	1/3745	11/107890	0.322013	0.80816	0.758439	TraesCS3D02G163900	1	BP
GO:0071459	protein localization to chromosome, centromeric region	1/3745	11/107890	0.322013	0.80816	0.758439	TraesCS6D02G207900	1	BP
GO:1901881	positive regulation of protein depolymerization	1/3745	11/107890	0.322013	0.80816	0.758439	TraesCS3D02G164500	1	BP
GO:0042214	terpene metabolic process	11/3745	267/107890	0.324493	0.80816	0.758439	TraesCS6D02G251800/TraesCS6D02G206800/TraesCS2B02G106500/TraesCS1B02G273500/TraesCS6B02G427200/TraesCS1A02G145300/TraesCS3A02G208800/TraesCS6B02G413300/TraesCS5B02G164400/TraesCS5A02G167400/TraesCS1B02G162500	11	BP
GO:0010119	regulation of stomatal movement	18/3745	457/107890	0.325807	0.80816	0.758439	TraesCS6D02G271900/TraesCS6D02G305800/TraesCS6D02G287100/TraesCS1B02G441400/TraesCS1B02G278600/TraesCS6B02G338000/TraesCS5B02G155200/TraesCS5B02G377900/TraesCS2B02G180000/TraesCS6B02G356400/TraesCS3A02G209200/TraesCS2D02G160200/TraesCS6B02G336500/TraesCS7B02G262200/TraesCS4D02G147600/TraesCS2A02G154900/TraesCS2B02G429200/TraesCS4D02G121300	18	BP
GO:0048571	long-day photoperiodism	7/3745	161/107890	0.326692	0.80816	0.758439	TraesCS7A02G218600/TraesCS6D02G241900/TraesCS6B02G113100/TraesCS7A02G263500/TraesCS6D02G267100/TraesCS7B02G009900/TraesCS3B02G151500	7	BP
GO:0000447	endonucleolytic cleavage in ITS1 to separate SSU-rRNA from 5.8S rRNA and LSU-rRNA from tricistronic rRNA transcript (SSU-rRNA, 5.8S rRNA, LSU-rRNA)	3/3745	58/107890	0.326945	0.80816	0.758439	TraesCS6D02G272800/TraesCS4D02G167600/TraesCS3A02G209700	3	BP
GO:0006432	phenylalanyl-tRNA aminoacylation	3/3745	58/107890	0.326945	0.80816	0.758439	TraesCS5B02G254900/TraesCS7A02G248100/TraesCS5A02G255200	3	BP
GO:0016073	snRNA metabolic process	3/3745	58/107890	0.326945	0.80816	0.758439	TraesCS6D02G269300/TraesCS6D02G204400/TraesCS1A02G324600	3	BP
GO:0044764	multi-organism cellular process	13/3745	322/107890	0.329038	0.80816	0.758439	TraesCS4A02G372200/TraesCS7D02G069700/TraesCS7A02G074600/TraesCS1A02G308300/TraesCS6B02G413400/TraesCS6B02G419000/TraesCS3A02G211000/TraesCS4A02G158000/TraesCS7A02G414500/TraesCS7B02G261800/TraesCS4A02G066100/TraesCS6B02G419400/TraesCS4B02G197800	13	BP
GO:0001817	regulation of cytokine production	8/3745	188/107890	0.329686	0.80816	0.758439	TraesCS6D02G270300/TraesCS6D02G190300/TraesCS6A02G406200/TraesCS2D02G480300/TraesCS6B02G452200/TraesCS4D02G091500/TraesCS7A02G418100/TraesCS5D02G479300	8	BP
GO:2000243	positive regulation of reproductive process	17/3745	431/107890	0.330101	0.80816	0.758439	TraesCS6D02G232600/TraesCS6D02G211700/TraesCS6D02G236400/TraesCS6B02G113100/TraesCS1A02G199900/TraesCS3A02G432900/TraesCS7B02G009900/TraesCS3D02G427900/TraesCS2B02G300500/TraesCS7D02G261900/TraesCS3D02G428000/TraesCS7B02G158900/TraesCS6B02G335200/TraesCS6B02G233700/TraesCS6B02G348300/TraesCS6B02G403400/TraesCS6B02G237800	17	BP
GO:0000381	regulation of alternative mRNA splicing, via spliceosome	2/3745	34/107890	0.331339	0.80816	0.758439	TraesCS7A02G234600/TraesCS1B02G252100	2	BP
GO:0006734	NADH metabolic process	2/3745	34/107890	0.331339	0.80816	0.758439	TraesCS2D02G408700/TraesCS2B02G430000	2	BP
GO:0010338	leaf formation	2/3745	34/107890	0.331339	0.80816	0.758439	TraesCS6B02G337300/TraesCS7B02G175400	2	BP
GO:0016123	xanthophyll biosynthetic process	2/3745	34/107890	0.331339	0.80816	0.758439	TraesCS3A02G208800/TraesCS6B02G432200	2	BP
GO:0031930	mitochondria-nucleus signaling pathway	2/3745	34/107890	0.331339	0.80816	0.758439	TraesCS2B02G459000/TraesCS2B02G459100	2	BP
GO:0051883	killing of cells in other organism involved in symbiotic interaction	2/3745	34/107890	0.331339	0.80816	0.758439	TraesCS2A02G292600/TraesCS2D02G290400	2	BP
GO:0061512	protein localization to cilium	2/3745	34/107890	0.331339	0.80816	0.758439	TraesCS6D02G252800/TraesCS6B02G461200	2	BP
GO:0009691	cytokinin biosynthetic process	12/3745	296/107890	0.333197	0.80816	0.758439	TraesCS6D02G195800/TraesCS1A02G156100/TraesCS6D02G257300/TraesCS6D02G239100/TraesCS6D02G294700/TraesCS2B02G066000/TraesCS1B02G328200/TraesCS7B02G009900/TraesCS1B02G239000/TraesCS6B02G334300/TraesCS6B02G227500/TraesCS2B02G039900	12	BP
GO:0000373	Group II intron splicing	4/3745	84/107890	0.333529	0.80816	0.758439	TraesCS6D02G275700/TraesCS6D02G244900/TraesCS6D02G227700/TraesCS1D02G081300	4	BP
GO:0001701	in utero embryonic development	4/3745	84/107890	0.333529	0.80816	0.758439	TraesCS6D02G315400/TraesCS4B02G109300/TraesCS6B02G470000/TraesCS6B02G366400	4	BP
GO:0002183	cytoplasmic translational initiation	5/3745	110/107890	0.33503	0.80816	0.758439	TraesCS6D02G331000/TraesCS7D02G069200/TraesCS6B02G421000/TraesCS6B02G381600/TraesCS3D02G161300	5	BP
GO:0002790	peptide secretion	5/3745	110/107890	0.33503	0.80816	0.758439	TraesCS1B02G259300/TraesCS6B02G344100/TraesCS5B02G157500/TraesCS6B02G229000/TraesCS6B02G396200	5	BP
GO:0042559	pteridine-containing compound biosynthetic process	5/3745	110/107890	0.33503	0.80816	0.758439	TraesCS7A02G276800/TraesCS7A02G276900/TraesCS2D02G218400/TraesCS3D02G167700/TraesCS6B02G348200	5	BP
GO:0071483	cellular response to blue light	5/3745	110/107890	0.33503	0.80816	0.758439	TraesCS6D02G187200/TraesCS6D02G211700/TraesCS5B02G155200/TraesCS6B02G224100/TraesCS6B02G237800	5	BP
GO:0009896	positive regulation of catabolic process	9/3745	216/107890	0.336389	0.80816	0.758439	TraesCS6D02G360700/TraesCS5B02G153700/TraesCS5A02G548000/TraesCS6B02G341600/TraesCS1D02G072900/TraesCS7B02G114200/TraesCS3A02G232500/TraesCS4B02G208900/TraesCS3D02G220700	9	BP
GO:0007205	protein kinase C-activating G protein-coupled receptor signaling pathway	3/3745	59/107890	0.336509	0.80816	0.758439	TraesCS3D02G101500/TraesCS1B02G248300/TraesCS6B02G381300	3	BP
GO:1905156	negative regulation of photosynthesis	3/3745	59/107890	0.336509	0.80816	0.758439	TraesCS2D02G034400/TraesCS2B02G048200/TraesCS3A02G209200	3	BP
GO:0007268	chemical synaptic transmission	12/3745	297/107890	0.337316	0.80816	0.758439	TraesCS6D02G187000/TraesCS6D02G349100/TraesCS6D02G254300/TraesCS3B02G146300/TraesCS1A02G089300/TraesCS7B02G492900/TraesCS1B02G252100/TraesCS6B02G342500/TraesCS6B02G377200/TraesCS6B02G344300/TraesCS6B02G432900/TraesCS4D02G305100	12	BP
GO:0098916	anterograde trans-synaptic signaling	12/3745	297/107890	0.337316	0.80816	0.758439	TraesCS6D02G187000/TraesCS6D02G349100/TraesCS6D02G254300/TraesCS3B02G146300/TraesCS1A02G089300/TraesCS7B02G492900/TraesCS1B02G252100/TraesCS6B02G342500/TraesCS6B02G377200/TraesCS6B02G344300/TraesCS6B02G432900/TraesCS4D02G305100	12	BP
GO:0099536	synaptic signaling	12/3745	297/107890	0.337316	0.80816	0.758439	TraesCS6D02G187000/TraesCS6D02G349100/TraesCS6D02G254300/TraesCS3B02G146300/TraesCS1A02G089300/TraesCS7B02G492900/TraesCS1B02G252100/TraesCS6B02G342500/TraesCS6B02G377200/TraesCS6B02G344300/TraesCS6B02G432900/TraesCS4D02G305100	12	BP
GO:0099537	trans-synaptic signaling	12/3745	297/107890	0.337316	0.80816	0.758439	TraesCS6D02G187000/TraesCS6D02G349100/TraesCS6D02G254300/TraesCS3B02G146300/TraesCS1A02G089300/TraesCS7B02G492900/TraesCS1B02G252100/TraesCS6B02G342500/TraesCS6B02G377200/TraesCS6B02G344300/TraesCS6B02G432900/TraesCS4D02G305100	12	BP
GO:0001775	cell activation	11/3745	270/107890	0.337438	0.80816	0.758439	TraesCS6D02G270300/TraesCS6D02G242400/TraesCS4B02G071600/TraesCS2D02G480300/TraesCS6B02G344100/TraesCS6B02G452200/TraesCS5B02G155400/TraesCS3A02G205700/TraesCS5B02G155600/TraesCS4D02G091500/TraesCS5D02G479300	11	BP
GO:0000038	very long-chain fatty acid metabolic process	17/3745	434/107890	0.340294	0.80816	0.758439	TraesCS6D02G193600/TraesCS6D02G181700/TraesCS7A02G221300/TraesCS6D02G274600/TraesCS7A02G221500/TraesCS5A02G268900/TraesCS1B02G272100/TraesCS1B02G249700/TraesCS1B02G273500/TraesCS6D02G166600/TraesCS6B02G207000/TraesCS6B02G241000/TraesCS6B02G238600/TraesCS6B02G230200/TraesCS3D02G283300/TraesCS6B02G239400/TraesCS6B02G473900	17	BP
GO:0046578	regulation of Ras protein signal transduction	9/3745	217/107890	0.341247	0.80816	0.758439	TraesCS7A02G270600/TraesCS7A02G263800/TraesCS6D02G204700/TraesCS6B02G456300/TraesCS6B02G377200/TraesCS6B02G335200/TraesCS6B02G415900/TraesCS6B02G228600/TraesCS4B02G175500	9	BP
GO:0046890	regulation of lipid biosynthetic process	9/3745	217/107890	0.341247	0.80816	0.758439	TraesCS6D02G358000/TraesCS2B02G358500/TraesCS2B02G106500/TraesCS4B02G095400/TraesCS2D02G442200/TraesCS3A02G289900/TraesCS3D02G289600/TraesCS3B02G324500/TraesCS6B02G411500	9	BP
GO:0008156	negative regulation of DNA replication	4/3745	85/107890	0.341441	0.80816	0.758439	TraesCS6D02G291000/TraesCS6D02G354500/TraesCS6B02G341900/TraesCS6B02G407600	4	BP
GO:0035264	multicellular organism growth	4/3745	85/107890	0.341441	0.80816	0.758439	TraesCS4D02G077900/TraesCS3D02G163900/TraesCS7B02G114200/TraesCS3D02G167400	4	BP
GO:0043966	histone H3 acetylation	4/3745	85/107890	0.341441	0.80816	0.758439	TraesCS6D02G232000/TraesCS6D02G196000/TraesCS1A02G107700/TraesCS3B02G151500	4	BP
GO:0048477	oogenesis	4/3745	85/107890	0.341441	0.80816	0.758439	TraesCS1B02G254600/TraesCS4A02G158000/TraesCS7B02G114200/TraesCS4D02G305100	4	BP
GO:0043647	inositol phosphate metabolic process	12/3745	298/107890	0.341446	0.80816	0.758439	TraesCS6D02G199200/TraesCS6D02G287000/TraesCS6D02G379900/TraesCS6B02G246500/TraesCS6A02G216400/TraesCS7B02G093800/TraesCS1B02G274000/TraesCS1B02G278600/TraesCS6B02G374700/TraesCS6B02G336400/TraesCS6B02G434400/TraesCS6B02G350700	12	BP
GO:1901264	carbohydrate derivative transport	12/3745	298/107890	0.341446	0.80816	0.758439	TraesCS6D02G187100/TraesCS2D02G408700/TraesCS2A02G380500/TraesCS2D02G376800/TraesCS2B02G397500/TraesCS4B02G119700/TraesCS6B02G456500/TraesCS3A02G206300/TraesCS6B02G224000/TraesCS6B02G382100/TraesCS2B02G430000/TraesCS4D02G245400	12	BP
GO:0000725	recombinational repair	15/3745	380/107890	0.342767	0.80816	0.758439	TraesCS6D02G301000/TraesCS6D02G315400/TraesCS6D02G304300/TraesCS6D02G235600/TraesCS7A02G213600/TraesCS6D02G196000/TraesCS6D02G214400/TraesCS4D02G133500/TraesCS6B02G354900/TraesCS6B02G352000/TraesCS6B02G366400/TraesCS3D02G165900/TraesCS6B02G351900/TraesCS6B02G462700/TraesCS6B02G351800	15	BP
GO:0005513	detection of calcium ion	2/3745	35/107890	0.344109	0.80816	0.758439	TraesCS5D02G392200/TraesCS5A02G382800	2	BP
GO:0006471	protein ADP-ribosylation	2/3745	35/107890	0.344109	0.80816	0.758439	TraesCS4B02G257300/TraesCS7A02G414700	2	BP
GO:0009219	pyrimidine deoxyribonucleotide metabolic process	2/3745	35/107890	0.344109	0.80816	0.758439	TraesCS7B02G119100/TraesCS6B02G381500	2	BP
GO:0015866	ADP transport	2/3745	35/107890	0.344109	0.80816	0.758439	TraesCS4B02G119700/TraesCS3A02G206300	2	BP
GO:0030259	lipid glycosylation	2/3745	35/107890	0.344109	0.80816	0.758439	TraesCS4A02G212800/TraesCS6B02G404700	2	BP
GO:0051224	negative regulation of protein transport	2/3745	35/107890	0.344109	0.80816	0.758439	TraesCS6D02G241800/TraesCS1B02G252700	2	BP
GO:1904950	negative regulation of establishment of protein localization	2/3745	35/107890	0.344109	0.80816	0.758439	TraesCS6D02G241800/TraesCS1B02G252700	2	BP
GO:0000733	DNA strand renaturation	1/3745	12/107890	0.345549	0.80816	0.758439	TraesCS4D02G133500	1	BP
GO:0006420	arginyl-tRNA aminoacylation	1/3745	12/107890	0.345549	0.80816	0.758439	TraesCS2A02G543800	1	BP
GO:0006434	seryl-tRNA aminoacylation	1/3745	12/107890	0.345549	0.80816	0.758439	TraesCS6B02G365000	1	BP
GO:0006577	amino-acid betaine metabolic process	1/3745	12/107890	0.345549	0.80816	0.758439	TraesCS6B02G408100	1	BP
GO:0006578	amino-acid betaine biosynthetic process	1/3745	12/107890	0.345549	0.80816	0.758439	TraesCS6B02G408100	1	BP
GO:0006624	vacuolar protein processing	1/3745	12/107890	0.345549	0.80816	0.758439	TraesCS6D02G226800	1	BP
GO:0006741	NADP biosynthetic process	1/3745	12/107890	0.345549	0.80816	0.758439	TraesCS1B02G253900	1	BP
GO:0009093	cysteine catabolic process	1/3745	12/107890	0.345549	0.80816	0.758439	TraesCS6B02G354300	1	BP
GO:0010273	detoxification of copper ion	1/3745	12/107890	0.345549	0.80816	0.758439	TraesCS2B02G429200	1	BP
GO:0017062	respiratory chain complex III assembly	1/3745	12/107890	0.345549	0.80816	0.758439	TraesCS7B02G326400	1	BP
GO:0019285	glycine betaine biosynthetic process from choline	1/3745	12/107890	0.345549	0.80816	0.758439	TraesCS6B02G408100	1	BP
GO:0021537	telencephalon development	1/3745	12/107890	0.345549	0.80816	0.758439	TraesCS7A02G262700	1	BP
GO:0031455	glycine betaine metabolic process	1/3745	12/107890	0.345549	0.80816	0.758439	TraesCS6B02G408100	1	BP
GO:0031456	glycine betaine biosynthetic process	1/3745	12/107890	0.345549	0.80816	0.758439	TraesCS6B02G408100	1	BP
GO:0033319	UDP-D-xylose metabolic process	1/3745	12/107890	0.345549	0.80816	0.758439	TraesCS2B02G129600	1	BP
GO:0033320	UDP-D-xylose biosynthetic process	1/3745	12/107890	0.345549	0.80816	0.758439	TraesCS2B02G129600	1	BP
GO:0034551	mitochondrial respiratory chain complex III assembly	1/3745	12/107890	0.345549	0.80816	0.758439	TraesCS7B02G326400	1	BP
GO:0045947	negative regulation of translational initiation	1/3745	12/107890	0.345549	0.80816	0.758439	TraesCS6B02G421000	1	BP
GO:0048496	maintenance of animal organ identity	1/3745	12/107890	0.345549	0.80816	0.758439	TraesCS1B02G273300	1	BP
GO:0051354	negative regulation of oxidoreductase activity	1/3745	12/107890	0.345549	0.80816	0.758439	TraesCS6D02G187100	1	BP
GO:0071222	cellular response to lipopolysaccharide	1/3745	12/107890	0.345549	0.80816	0.758439	TraesCS6B02G350800	1	BP
GO:0090352	regulation of nitrate assimilation	1/3745	12/107890	0.345549	0.80816	0.758439	TraesCS5B02G153300	1	BP
GO:0090391	granum assembly	1/3745	12/107890	0.345549	0.80816	0.758439	TraesCS3A02G210000	1	BP
GO:1903314	regulation of nitrogen cycle metabolic process	1/3745	12/107890	0.345549	0.80816	0.758439	TraesCS5B02G153300	1	BP
GO:0048582	positive regulation of post-embryonic development	18/3745	463/107890	0.345571	0.80816	0.758439	TraesCS6D02G232600/TraesCS6D02G211700/TraesCS6D02G236400/TraesCS6B02G113100/TraesCS1A02G199900/TraesCS3A02G432900/TraesCS7B02G009900/TraesCS3D02G427900/TraesCS2B02G300500/TraesCS7D02G261900/TraesCS3D02G428000/TraesCS7B02G158900/TraesCS2A02G288700/TraesCS3D02G163900/TraesCS6B02G335200/TraesCS6B02G348300/TraesCS6B02G237800/TraesCS7D02G254300	18	BP
GO:0006782	protoporphyrinogen IX biosynthetic process	3/3745	60/107890	0.346064	0.80816	0.758439	TraesCS7A02G260800/TraesCS1B02G258200/TraesCS7A02G415000	3	BP
GO:0043488	regulation of mRNA stability	3/3745	60/107890	0.346064	0.80816	0.758439	TraesCS7B02G114200/TraesCS3A02G232500/TraesCS3D02G220700	3	BP
GO:0046501	protoporphyrinogen IX metabolic process	3/3745	60/107890	0.346064	0.80816	0.758439	TraesCS7A02G260800/TraesCS1B02G258200/TraesCS7A02G415000	3	BP
GO:2000045	regulation of G1/S transition of mitotic cell cycle	3/3745	60/107890	0.346064	0.80816	0.758439	TraesCS6D02G195300/TraesCS6D02G305800/TraesCS6B02G356400	3	BP
GO:0009118	regulation of nucleoside metabolic process	9/3745	218/107890	0.346116	0.80816	0.758439	TraesCS6D02G232600/TraesCS7A02G270600/TraesCS7A02G263800/TraesCS6D02G204700/TraesCS1B02G266900/TraesCS6B02G377200/TraesCS6B02G415900/TraesCS4B02G175500/TraesCS4D02G305100	9	BP
GO:0030811	regulation of nucleotide catabolic process	9/3745	218/107890	0.346116	0.80816	0.758439	TraesCS6D02G232600/TraesCS7A02G270600/TraesCS7A02G263800/TraesCS6D02G204700/TraesCS1B02G266900/TraesCS6B02G377200/TraesCS6B02G415900/TraesCS4B02G175500/TraesCS4D02G305100	9	BP
GO:0033121	regulation of purine nucleotide catabolic process	9/3745	218/107890	0.346116	0.80816	0.758439	TraesCS6D02G232600/TraesCS7A02G270600/TraesCS7A02G263800/TraesCS6D02G204700/TraesCS1B02G266900/TraesCS6B02G377200/TraesCS6B02G415900/TraesCS4B02G175500/TraesCS4D02G305100	9	BP
GO:0010304	PSII associated light-harvesting complex II catabolic process	6/3745	138/107890	0.346574	0.80816	0.758439	TraesCS6D02G183600/TraesCS6D02G222800/TraesCS7A02G276900/TraesCS6B02G233800/TraesCS6B02G357800/TraesCS1A02G186200	6	BP
GO:0034308	primary alcohol metabolic process	6/3745	138/107890	0.346574	0.80816	0.758439	TraesCS2D02G408700/TraesCS4D02G351800/TraesCS4B02G358500/TraesCS6B02G425700/TraesCS2B02G430000/TraesCS6D02G082300	6	BP
GO:0031647	regulation of protein stability	5/3745	112/107890	0.348801	0.811913	0.761961	TraesCS6D02G380400/TraesCS2D02G033200/TraesCS2B02G047400/TraesCS6B02G435000/TraesCS2A02G033700	5	BP
GO:0032886	regulation of microtubule-based process	5/3745	112/107890	0.348801	0.811913	0.761961	TraesCS1B02G267200/TraesCS3D02G164500/TraesCS5D02G184300/TraesCS5A02G179700/TraesCS5B02G177500	5	BP
GO:0009312	oligosaccharide biosynthetic process	12/3745	300/107890	0.349733	0.813362	0.763321	TraesCS7A02G209600/TraesCS6D02G334000/TraesCS3D02G385400/TraesCS1B02G249700/TraesCS1B02G265900/TraesCS6B02G235400/TraesCS6B02G384500/TraesCS7A02G419200/TraesCS1B02G224300/TraesCS6B02G393900/TraesCS6B02G429500/TraesCS6B02G330900	12	BP
GO:0030097	hemopoiesis	8/3745	192/107890	0.350493	0.814409	0.764303	TraesCS6D02G315400/TraesCS4B02G071600/TraesCS2D02G480300/TraesCS4D02G145700/TraesCS3D02G166200/TraesCS6B02G350800/TraesCS6B02G366400/TraesCS6B02G387300	8	BP
GO:1902905	positive regulation of supramolecular fiber organization	19/3745	493/107890	0.353666	0.819928	0.769483	TraesCS7A02G284900/TraesCS7A02G263800/TraesCS7A02G518700/TraesCS1B02G267200/TraesCS1B02G278600/TraesCS4B02G173500/TraesCS6B02G226700/TraesCS3D02G164500/TraesCS6B02G240500/TraesCS7A02G414500/TraesCS6B02G432000/TraesCS6B02G466700/TraesCS4D02G341000/TraesCS3A02G210100/TraesCS4B02G346100/TraesCS5A02G515000/TraesCS2A02G368700/TraesCS4A02G067300/TraesCS4D02G225200	19	BP
GO:0009864	induced systemic resistance, jasmonic acid mediated signaling pathway	3/3745	61/107890	0.355606	0.819928	0.769483	TraesCS6B02G281000/TraesCS6A02G243300/TraesCS4D02G121300	3	BP
GO:0016926	protein desumoylation	13/3745	329/107890	0.356734	0.819928	0.769483	TraesCS7A02G210100/TraesCS6D02G272400/TraesCS6D02G325100/TraesCS6D02G236400/TraesCS3D02G366500/TraesCS5D02G230300/TraesCS6B02G436400/TraesCS4D02G133700/TraesCS6B02G415700/TraesCS6B02G333700/TraesCS4A02G157500/TraesCS6B02G376200/TraesCS2A02G368700	13	BP
GO:0042304	regulation of fatty acid biosynthetic process	2/3745	36/107890	0.356798	0.819928	0.769483	TraesCS6D02G358000/TraesCS6B02G411500	2	BP
GO:0045580	regulation of T cell differentiation	2/3745	36/107890	0.356798	0.819928	0.769483	TraesCS4B02G071600/TraesCS2D02G480300	2	BP
GO:0045785	positive regulation of cell adhesion	2/3745	36/107890	0.356798	0.819928	0.769483	TraesCS7A02G221500/TraesCS6B02G241000	2	BP
GO:0001731	formation of translation preinitiation complex	4/3745	87/107890	0.357277	0.819928	0.769483	TraesCS6D02G331000/TraesCS7D02G069200/TraesCS6B02G381600/TraesCS3D02G161300	4	BP
GO:0051650	establishment of vesicle localization	4/3745	87/107890	0.357277	0.819928	0.769483	TraesCS6D02G254300/TraesCS1B02G252100/TraesCS6B02G335200/TraesCS6B02G338000	4	BP
GO:0051552	flavone metabolic process	12/3745	303/107890	0.362227	0.819928	0.769483	TraesCS6D02G388700/TraesCS4B02G081200/TraesCS7D02G341500/TraesCS3A02G534900/TraesCS3D02G540200/TraesCS6B02G449400/TraesCS3B02G612000/TraesCS2B02G057100/TraesCS1D02G072700/TraesCS7D02G190600/TraesCS3D02G403000/TraesCS2D02G043500	12	BP
GO:0051553	flavone biosynthetic process	12/3745	303/107890	0.362227	0.819928	0.769483	TraesCS6D02G388700/TraesCS4B02G081200/TraesCS7D02G341500/TraesCS3A02G534900/TraesCS3D02G540200/TraesCS6B02G449400/TraesCS3B02G612000/TraesCS2B02G057100/TraesCS1D02G072700/TraesCS7D02G190600/TraesCS3D02G403000/TraesCS2D02G043500	12	BP
GO:0051495	positive regulation of cytoskeleton organization	19/3745	496/107890	0.363403	0.819928	0.769483	TraesCS7A02G284900/TraesCS7A02G263800/TraesCS7A02G518700/TraesCS1B02G267200/TraesCS1B02G278600/TraesCS4B02G173500/TraesCS6B02G226700/TraesCS3D02G164500/TraesCS6B02G240500/TraesCS7A02G414500/TraesCS6B02G432000/TraesCS6B02G466700/TraesCS4D02G341000/TraesCS3A02G210100/TraesCS4B02G346100/TraesCS5A02G515000/TraesCS2A02G368700/TraesCS4A02G067300/TraesCS4D02G225200	19	BP
GO:0045010	actin nucleation	17/3745	441/107890	0.364332	0.819928	0.769483	TraesCS7A02G284900/TraesCS7A02G263800/TraesCS7A02G518700/TraesCS1B02G278600/TraesCS4B02G173500/TraesCS6B02G226700/TraesCS6B02G240500/TraesCS7A02G414500/TraesCS6B02G432000/TraesCS6B02G466700/TraesCS4D02G341000/TraesCS3A02G210100/TraesCS4B02G346100/TraesCS5A02G515000/TraesCS2A02G368700/TraesCS4A02G067300/TraesCS4D02G225200	17	BP
GO:0033239	negative regulation of cellular amine metabolic process	3/3745	62/107890	0.365129	0.819928	0.769483	TraesCS6D02G335000/TraesCS6B02G385200/TraesCS6B02G226200	3	BP
GO:0043487	regulation of RNA stability	3/3745	62/107890	0.365129	0.819928	0.769483	TraesCS7B02G114200/TraesCS3A02G232500/TraesCS3D02G220700	3	BP
GO:0043622	cortical microtubule organization	3/3745	62/107890	0.365129	0.819928	0.769483	TraesCS3D02G164500/TraesCS6B02G226200/TraesCS4B02G173200	3	BP
GO:0006450	regulation of translational fidelity	4/3745	88/107890	0.365194	0.819928	0.769483	TraesCS6D02G229600/TraesCS7D02G548900/TraesCS6B02G367200/TraesCS6B02G361500	4	BP
GO:0043628	ncRNA 3'-end processing	4/3745	88/107890	0.365194	0.819928	0.769483	TraesCS6D02G384500/TraesCS4D02G167600/TraesCS1A02G324600/TraesCS3D02G163900	4	BP
GO:0001706	endoderm formation	1/3745	13/107890	0.368268	0.819928	0.769483	TraesCS6B02G350800	1	BP
GO:0002088	lens development in camera-type eye	1/3745	13/107890	0.368268	0.819928	0.769483	TraesCS6D02G195300	1	BP
GO:0006104	succinyl-CoA metabolic process	1/3745	13/107890	0.368268	0.819928	0.769483	TraesCS7A02G256900	1	BP
GO:0006212	uracil catabolic process	1/3745	13/107890	0.368268	0.819928	0.769483	TraesCS4D02G145000	1	BP
GO:0006386	termination of RNA polymerase III transcription	1/3745	13/107890	0.368268	0.819928	0.769483	TraesCS6D02G236300	1	BP
GO:0007293	germarium-derived egg chamber formation	1/3745	13/107890	0.368268	0.819928	0.769483	TraesCS4D02G305100	1	BP
GO:0007308	oocyte construction	1/3745	13/107890	0.368268	0.819928	0.769483	TraesCS4D02G305100	1	BP
GO:0007309	oocyte axis specification	1/3745	13/107890	0.368268	0.819928	0.769483	TraesCS4D02G305100	1	BP
GO:0007314	oocyte anterior/posterior axis specification	1/3745	13/107890	0.368268	0.819928	0.769483	TraesCS4D02G305100	1	BP
GO:0008358	maternal determination of anterior/posterior axis, embryo	1/3745	13/107890	0.368268	0.819928	0.769483	TraesCS4D02G305100	1	BP
GO:0009413	response to flooding	1/3745	13/107890	0.368268	0.819928	0.769483	TraesCS7A02G040900	1	BP
GO:0010360	negative regulation of anion channel activity	1/3745	13/107890	0.368268	0.819928	0.769483	TraesCS5B02G155200	1	BP
GO:0010600	regulation of auxin biosynthetic process	1/3745	13/107890	0.368268	0.819928	0.769483	TraesCS6D02G241900	1	BP
GO:0015880	coenzyme A transport	1/3745	13/107890	0.368268	0.819928	0.769483	TraesCS3A02G206300	1	BP
GO:0016254	preassembly of GPI anchor in ER membrane	1/3745	13/107890	0.368268	0.819928	0.769483	TraesCS6D02G210300	1	BP
GO:0032006	regulation of TOR signaling	1/3745	13/107890	0.368268	0.819928	0.769483	TraesCS6B02G405200	1	BP
GO:0032790	ribosome disassembly	1/3745	13/107890	0.368268	0.819928	0.769483	TraesCS6B02G388100	1	BP
GO:0035349	coenzyme A transmembrane transport	1/3745	13/107890	0.368268	0.819928	0.769483	TraesCS3A02G206300	1	BP
GO:0046331	lateral inhibition	1/3745	13/107890	0.368268	0.819928	0.769483	TraesCS3D02G163900	1	BP
GO:0048255	mRNA stabilization	1/3745	13/107890	0.368268	0.819928	0.769483	TraesCS7B02G114200	1	BP
GO:0050768	negative regulation of neurogenesis	1/3745	13/107890	0.368268	0.819928	0.769483	TraesCS7A02G228200	1	BP
GO:0070306	lens fiber cell differentiation	1/3745	13/107890	0.368268	0.819928	0.769483	TraesCS6D02G195300	1	BP
GO:0071106	adenosine 3',5'-bisphosphate transmembrane transport	1/3745	13/107890	0.368268	0.819928	0.769483	TraesCS3A02G206300	1	BP
GO:1902373	negative regulation of mRNA catabolic process	1/3745	13/107890	0.368268	0.819928	0.769483	TraesCS7B02G114200	1	BP
GO:1903792	negative regulation of anion transport	1/3745	13/107890	0.368268	0.819928	0.769483	TraesCS5B02G155200	1	BP
GO:1903960	negative regulation of anion transmembrane transport	1/3745	13/107890	0.368268	0.819928	0.769483	TraesCS5B02G155200	1	BP
GO:1990169	stress response to copper ion	1/3745	13/107890	0.368268	0.819928	0.769483	TraesCS2B02G429200	1	BP
GO:0033674	positive regulation of kinase activity	15/3745	387/107890	0.368545	0.819928	0.769483	TraesCS6D02G332100/TraesCS6D02G328800/TraesCS5B02G154600/TraesCS4B02G116000/TraesCS6B02G362300/TraesCS6B02G226200/TraesCS4B02G115800/TraesCS6B02G382700/TraesCS6B02G352700/TraesCS6B02G379500/TraesCS5D02G184300/TraesCS6B02G358800/TraesCS5A02G179700/TraesCS1B02G375400/TraesCS5B02G177500	15	BP
GO:0008585	female gonad development	2/3745	37/107890	0.369397	0.819928	0.769483	TraesCS6B02G421000/TraesCS2B02G594400	2	BP
GO:0030217	T cell differentiation	2/3745	37/107890	0.369397	0.819928	0.769483	TraesCS4B02G071600/TraesCS2D02G480300	2	BP
GO:0043433	negative regulation of DNA-binding transcription factor activity	2/3745	37/107890	0.369397	0.819928	0.769483	TraesCS6B02G447600/TraesCS6B02G462100	2	BP
GO:0050808	synapse organization	2/3745	37/107890	0.369397	0.819928	0.769483	TraesCS6B02G377200/TraesCS4D02G126400	2	BP
GO:0051216	cartilage development	2/3745	37/107890	0.369397	0.819928	0.769483	TraesCS3B02G162400/TraesCS4D02G126400	2	BP
GO:0055070	copper ion homeostasis	2/3745	37/107890	0.369397	0.819928	0.769483	TraesCS7A02G239900/TraesCS6B02G393800	2	BP
GO:0061448	connective tissue development	2/3745	37/107890	0.369397	0.819928	0.769483	TraesCS3B02G162400/TraesCS4D02G126400	2	BP
GO:1900542	regulation of purine nucleotide metabolic process	10/3745	250/107890	0.369404	0.819928	0.769483	TraesCS6D02G232600/TraesCS7A02G270600/TraesCS7A02G263800/TraesCS6D02G204700/TraesCS6D02G219600/TraesCS1B02G266900/TraesCS6B02G377200/TraesCS6B02G415900/TraesCS4B02G175500/TraesCS4D02G305100	10	BP
GO:0010029	regulation of seed germination	17/3745	443/107890	0.371255	0.822704	0.772088	TraesCS6D02G184500/TraesCS6D02G216600/TraesCS3D02G385400/TraesCS1B02G441400/TraesCS6D02G220700/TraesCS2A02G288700/TraesCS3A02G210600/TraesCS6B02G367800/TraesCS3A02G209200/TraesCS6B02G230000/TraesCS5B02G244000/TraesCS6B02G334900/TraesCS6B02G342700/TraesCS5D02G253400/TraesCS7D02G364600/TraesCS7A02G358200/TraesCS7B02G269600	17	BP
GO:0007281	germ cell development	6/3745	142/107890	0.371331	0.822704	0.772088	TraesCS1B02G254600/TraesCS3D02G163900/TraesCS6B02G335200/TraesCS4A02G158000/TraesCS7B02G114200/TraesCS4D02G305100	6	BP
GO:0035435	phosphate ion transmembrane transport	11/3745	278/107890	0.372377	0.822704	0.772088	TraesCS7A02G231200/TraesCS6D02G187100/TraesCS6D02G191600/TraesCS6D02G364600/TraesCS2A02G380500/TraesCS2D02G376800/TraesCS2B02G397500/TraesCS6B02G236600/TraesCS6B02G224000/TraesCS4D02G245400/TraesCS6B02G418600	11	BP
GO:0035107	appendage morphogenesis	4/3745	89/107890	0.373106	0.822704	0.772088	TraesCS7A02G262700/TraesCS7A02G465800/TraesCS2D02G480300/TraesCS6B02G335200	4	BP
GO:0043903	regulation of biological process involved in symbiotic interaction	4/3745	89/107890	0.373106	0.822704	0.772088	TraesCS6D02G254000/TraesCS1B02G254800/TraesCS2A02G292600/TraesCS2D02G290400	4	BP
GO:0051205	protein insertion into membrane	4/3745	89/107890	0.373106	0.822704	0.772088	TraesCS7A02G282000/TraesCS6D02G240500/TraesCS7A02G262900/TraesCS1B02G199200	4	BP
GO:0051347	positive regulation of transferase activity	19/3745	499/107890	0.373188	0.822704	0.772088	TraesCS6D02G332100/TraesCS6D02G328800/TraesCS6D02G354500/TraesCS2D02G339900/TraesCS5B02G154600/TraesCS6B02G402400/TraesCS4B02G116000/TraesCS6B02G362300/TraesCS6B02G226200/TraesCS4B02G115800/TraesCS6B02G382700/TraesCS6B02G352700/TraesCS6B02G379500/TraesCS5D02G184300/TraesCS6B02G358800/TraesCS4D02G195000/TraesCS5A02G179700/TraesCS1B02G375400/TraesCS5B02G177500	19	BP
GO:0009616	RNAi-mediated antiviral immune response	14/3745	361/107890	0.3745	0.822704	0.772088	TraesCS7A02G265300/TraesCS7A02G211100/TraesCS6D02G181800/TraesCS7A02G265200/TraesCS6D02G269400/TraesCS5D02G454200/TraesCS5B02G154600/TraesCS6B02G468200/TraesCS6B02G235400/TraesCS5B02G157800/TraesCS6B02G447600/TraesCS3D02G162700/TraesCS3D02G165900/TraesCS6B02G466700	14	BP
GO:0052018	modulation by symbiont of RNA levels in host	14/3745	361/107890	0.3745	0.822704	0.772088	TraesCS7A02G265300/TraesCS7A02G211100/TraesCS6D02G181800/TraesCS7A02G265200/TraesCS6D02G269400/TraesCS5D02G454200/TraesCS5B02G154600/TraesCS6B02G468200/TraesCS6B02G235400/TraesCS5B02G157800/TraesCS6B02G447600/TraesCS3D02G162700/TraesCS3D02G165900/TraesCS6B02G466700	14	BP
GO:0052249	modulation of RNA levels in other organism involved in symbiotic interaction	14/3745	361/107890	0.3745	0.822704	0.772088	TraesCS7A02G265300/TraesCS7A02G211100/TraesCS6D02G181800/TraesCS7A02G265200/TraesCS6D02G269400/TraesCS5D02G454200/TraesCS5B02G154600/TraesCS6B02G468200/TraesCS6B02G235400/TraesCS5B02G157800/TraesCS6B02G447600/TraesCS3D02G162700/TraesCS3D02G165900/TraesCS6B02G466700	14	BP
GO:0000746	conjugation	3/3745	63/107890	0.374628	0.822704	0.772088	TraesCS4A02G158000/TraesCS4A02G066100/TraesCS4B02G197800	3	BP
GO:1902806	regulation of cell cycle G1/S phase transition	3/3745	63/107890	0.374628	0.822704	0.772088	TraesCS6D02G195300/TraesCS6D02G305800/TraesCS6B02G356400	3	BP
GO:0030838	positive regulation of actin filament polymerization	17/3745	444/107890	0.374725	0.822704	0.772088	TraesCS7A02G284900/TraesCS7A02G263800/TraesCS7A02G518700/TraesCS1B02G278600/TraesCS4B02G173500/TraesCS6B02G226700/TraesCS6B02G240500/TraesCS7A02G414500/TraesCS6B02G432000/TraesCS6B02G466700/TraesCS4D02G341000/TraesCS3A02G210100/TraesCS4B02G346100/TraesCS5A02G515000/TraesCS2A02G368700/TraesCS4A02G067300/TraesCS4D02G225200	17	BP
GO:0090421	embryonic meristem initiation	8/3745	197/107890	0.376709	0.82637	0.775529	TraesCS6D02G359000/TraesCS6D02G186900/TraesCS1B02G238200/TraesCS6B02G223700/TraesCS6B02G356900/TraesCS6B02G412000/TraesCS6B02G466700/TraesCS3A02G210100	8	BP
GO:0007093	mitotic cell cycle checkpoint	9/3745	225/107890	0.380437	0.828077	0.777131	TraesCS6D02G195300/TraesCS6D02G191700/TraesCS6D02G305800/TraesCS7A02G214200/TraesCS6D02G233200/TraesCS6D02G327000/TraesCS6A02G309600/TraesCS6B02G356400/TraesCS6B02G236700	9	BP
GO:0001889	liver development	2/3745	38/107890	0.381896	0.828077	0.777131	TraesCS6D02G213600/TraesCS3B02G162400	2	BP
GO:0043618	regulation of transcription from RNA polymerase II promoter in response to stress	2/3745	38/107890	0.381896	0.828077	0.777131	TraesCS6D02G254700/TraesCS6B02G398500	2	BP
GO:0046545	development of primary female sexual characteristics	2/3745	38/107890	0.381896	0.828077	0.777131	TraesCS6B02G421000/TraesCS2B02G594400	2	BP
GO:0050000	chromosome localization	2/3745	38/107890	0.381896	0.828077	0.777131	TraesCS6D02G233200/TraesCS7B02G121400	2	BP
GO:0051013	microtubule severing	2/3745	38/107890	0.381896	0.828077	0.777131	TraesCS6D02G395000/TraesCS6B02G460300	2	BP
GO:0061008	hepaticobiliary system development	2/3745	38/107890	0.381896	0.828077	0.777131	TraesCS6D02G213600/TraesCS3B02G162400	2	BP
GO:0048667	cell morphogenesis involved in neuron differentiation	6/3745	144/107890	0.383735	0.828077	0.777131	TraesCS6D02G242400/TraesCS1B02G266200/TraesCS5B02G159100/TraesCS6B02G377200/TraesCS6B02G335200/TraesCS4D02G305100	6	BP
GO:0006222	UMP biosynthetic process	3/3745	64/107890	0.384097	0.828077	0.777131	TraesCS7A02G259200/TraesCS6D02G254500/TraesCS3A02G206600	3	BP
GO:0009174	pyrimidine ribonucleoside monophosphate biosynthetic process	3/3745	64/107890	0.384097	0.828077	0.777131	TraesCS7A02G259200/TraesCS6D02G254500/TraesCS3A02G206600	3	BP
GO:0010023	proanthocyanidin biosynthetic process	3/3745	64/107890	0.384097	0.828077	0.777131	TraesCS7A02G211400/TraesCS2B02G102900/TraesCS6D02G015400	3	BP
GO:0046049	UMP metabolic process	3/3745	64/107890	0.384097	0.828077	0.777131	TraesCS7A02G259200/TraesCS6D02G254500/TraesCS3A02G206600	3	BP
GO:0055062	phosphate ion homeostasis	3/3745	64/107890	0.384097	0.828077	0.777131	TraesCS7A02G263000/TraesCS1B02G415800/TraesCS2B02G430000	3	BP
GO:0072506	trivalent inorganic anion homeostasis	3/3745	64/107890	0.384097	0.828077	0.777131	TraesCS7A02G263000/TraesCS1B02G415800/TraesCS2B02G430000	3	BP
GO:0002237	response to molecule of bacterial origin	18/3745	475/107890	0.385795	0.828077	0.777131	TraesCS6D02G294600/TraesCS7A02G269200/TraesCS6D02G328800/TraesCS7B02G283000/TraesCS5A02G495200/TraesCS2B02G332800/TraesCS6B02G425700/TraesCS6B02G366900/TraesCS3D02G164500/TraesCS6B02G350800/TraesCS2A02G019400/TraesCS6B02G379500/TraesCS5B02G158800/TraesCS6B02G345800/TraesCS7A02G416300/TraesCS2B02G429300/TraesCS6D02G080500/TraesCS6A02G091700	18	BP
GO:0043401	steroid hormone mediated signaling pathway	13/3745	337/107890	0.388819	0.828077	0.777131	TraesCS6D02G186900/TraesCS6D02G194500/TraesCS6D02G293200/TraesCS7A02G220700/TraesCS1B02G262200/TraesCS1B02G255700/TraesCS4B02G288000/TraesCS7D02G176700/TraesCS6B02G223700/TraesCS6B02G388600/TraesCS6B02G343900/TraesCS6B02G240900/TraesCS5D02G225200	13	BP
GO:0050865	regulation of cell activation	6/3745	145/107890	0.389939	0.828077	0.777131	TraesCS6D02G242400/TraesCS4B02G071600/TraesCS2D02G480300/TraesCS6B02G452200/TraesCS4D02G091500/TraesCS5D02G479300	6	BP
GO:0007565	female pregnancy	1/3745	14/107890	0.390199	0.828077	0.777131	TraesCS4D02G091500	1	BP
GO:0008593	regulation of Notch signaling pathway	1/3745	14/107890	0.390199	0.828077	0.777131	TraesCS6D02G202800	1	BP
GO:0010032	meiotic chromosome condensation	1/3745	14/107890	0.390199	0.828077	0.777131	TraesCS1B02G244100	1	BP
GO:0010239	chloroplast mRNA processing	1/3745	14/107890	0.390199	0.828077	0.777131	TraesCS1B02G257400	1	BP
GO:0010289	homogalacturonan biosynthetic process	1/3745	14/107890	0.390199	0.828077	0.777131	TraesCS6B02G348700	1	BP
GO:0010394	homogalacturonan metabolic process	1/3745	14/107890	0.390199	0.828077	0.777131	TraesCS6B02G348700	1	BP
GO:0010438	cellular response to sulfur starvation	1/3745	14/107890	0.390199	0.828077	0.777131	TraesCS4B02G281800	1	BP
GO:0015708	silicic acid import across plasma membrane	1/3745	14/107890	0.390199	0.828077	0.777131	TraesCS6D02G286400	1	BP
GO:0019835	cytolysis	1/3745	14/107890	0.390199	0.828077	0.777131	TraesCS1D02G218400	1	BP
GO:0030952	establishment or maintenance of cytoskeleton polarity	1/3745	14/107890	0.390199	0.828077	0.777131	TraesCS4D02G305100	1	BP
GO:0032410	negative regulation of transporter activity	1/3745	14/107890	0.390199	0.828077	0.777131	TraesCS5B02G155200	1	BP
GO:0032413	negative regulation of ion transmembrane transporter activity	1/3745	14/107890	0.390199	0.828077	0.777131	TraesCS5B02G155200	1	BP
GO:0033059	cellular pigmentation	1/3745	14/107890	0.390199	0.828077	0.777131	TraesCS6B02G387300	1	BP
GO:0034766	negative regulation of ion transmembrane transport	1/3745	14/107890	0.390199	0.828077	0.777131	TraesCS5B02G155200	1	BP
GO:0042450	arginine biosynthetic process via ornithine	1/3745	14/107890	0.390199	0.828077	0.777131	TraesCS6B02G274800	1	BP
GO:0043277	apoptotic cell clearance	1/3745	14/107890	0.390199	0.828077	0.777131	TraesCS6B02G396200	1	BP
GO:0043489	RNA stabilization	1/3745	14/107890	0.390199	0.828077	0.777131	TraesCS7B02G114200	1	BP
GO:0045226	extracellular polysaccharide biosynthetic process	1/3745	14/107890	0.390199	0.828077	0.777131	TraesCS6B02G455100	1	BP
GO:0046379	extracellular polysaccharide metabolic process	1/3745	14/107890	0.390199	0.828077	0.777131	TraesCS6B02G455100	1	BP
GO:0060211	regulation of nuclear-transcribed mRNA poly(A) tail shortening	1/3745	14/107890	0.390199	0.828077	0.777131	TraesCS5B02G159400	1	BP
GO:0070981	L-asparagine biosynthetic process	1/3745	14/107890	0.390199	0.828077	0.777131	TraesCS5A02G153900	1	BP
GO:0070982	L-asparagine metabolic process	1/3745	14/107890	0.390199	0.828077	0.777131	TraesCS5A02G153900	1	BP
GO:1902369	negative regulation of RNA catabolic process	1/3745	14/107890	0.390199	0.828077	0.777131	TraesCS7B02G114200	1	BP
GO:0001816	cytokine production	8/3745	200/107890	0.392501	0.828077	0.777131	TraesCS6D02G270300/TraesCS6D02G190300/TraesCS6A02G406200/TraesCS2D02G480300/TraesCS6B02G452200/TraesCS4D02G091500/TraesCS7A02G418100/TraesCS5D02G479300	8	BP
GO:0009787	regulation of abscisic acid-activated signaling pathway	13/3745	338/107890	0.392851	0.828077	0.777131	TraesCS1B02G441400/TraesCS6B02G432600/TraesCS6B02G338000/TraesCS5B02G153300/TraesCS3A02G209200/TraesCS5D02G144800/TraesCS3D02G161900/TraesCS3B02G371200/TraesCS3A02G339600/TraesCS4B02G120400/TraesCS7D02G364600/TraesCS7A02G358200/TraesCS7B02G269600	13	BP
GO:1901419	regulation of response to alcohol	13/3745	338/107890	0.392851	0.828077	0.777131	TraesCS1B02G441400/TraesCS6B02G432600/TraesCS6B02G338000/TraesCS5B02G153300/TraesCS3A02G209200/TraesCS5D02G144800/TraesCS3D02G161900/TraesCS3B02G371200/TraesCS3A02G339600/TraesCS4B02G120400/TraesCS7D02G364600/TraesCS7A02G358200/TraesCS7B02G269600	13	BP
GO:1905957	regulation of cellular response to alcohol	13/3745	338/107890	0.392851	0.828077	0.777131	TraesCS1B02G441400/TraesCS6B02G432600/TraesCS6B02G338000/TraesCS5B02G153300/TraesCS3A02G209200/TraesCS5D02G144800/TraesCS3D02G161900/TraesCS3B02G371200/TraesCS3A02G339600/TraesCS4B02G120400/TraesCS7D02G364600/TraesCS7A02G358200/TraesCS7B02G269600	13	BP
GO:0009173	pyrimidine ribonucleoside monophosphate metabolic process	3/3745	65/107890	0.393533	0.828077	0.777131	TraesCS7A02G259200/TraesCS6D02G254500/TraesCS3A02G206600	3	BP
GO:0010555	response to mannitol	3/3745	65/107890	0.393533	0.828077	0.777131	TraesCS6D02G294500/TraesCS3D02G164500/TraesCS6B02G345700	3	BP
GO:0072505	divalent inorganic anion homeostasis	3/3745	65/107890	0.393533	0.828077	0.777131	TraesCS7A02G263000/TraesCS1B02G415800/TraesCS2B02G430000	3	BP
GO:0000967	rRNA 5'-end processing	2/3745	39/107890	0.394288	0.828077	0.777131	TraesCS6D02G272800/TraesCS3A02G209700	2	BP
GO:0006123	mitochondrial electron transport, cytochrome c to oxygen	2/3745	39/107890	0.394288	0.828077	0.777131	TraesCS7A02G239000/TraesCS3A02G405000	2	BP
GO:0008215	spermine metabolic process	2/3745	39/107890	0.394288	0.828077	0.777131	TraesCS6D02G202500/TraesCS6D02G202400	2	BP
GO:0045824	negative regulation of innate immune response	2/3745	39/107890	0.394288	0.828077	0.777131	TraesCS6D02G196000/TraesCS5B02G153300	2	BP
GO:0072595	maintenance of protein localization in organelle	2/3745	39/107890	0.394288	0.828077	0.777131	TraesCS7A02G271400/TraesCS6B02G417700	2	BP
GO:0042023	DNA endoreduplication	11/3745	283/107890	0.394422	0.828077	0.777131	TraesCS6D02G195300/TraesCS7A02G248700/TraesCS6D02G233200/TraesCS6D02G291000/TraesCS6D02G354500/TraesCS5D02G475400/TraesCS6B02G233700/TraesCS6B02G356900/TraesCS6B02G345300/TraesCS6B02G341900/TraesCS6B02G407600	11	BP
GO:0002833	positive regulation of response to biotic stimulus	7/3745	173/107890	0.394502	0.828077	0.777131	TraesCS7A02G262400/TraesCS6D02G179200/TraesCS6B02G281000/TraesCS2A02G292600/TraesCS2D02G290400/TraesCS6A02G243300/TraesCS4D02G121300	7	BP
GO:0007507	heart development	4/3745	92/107890	0.39678	0.832194	0.780994	TraesCS6D02G315400/TraesCS2D02G480300/TraesCS6B02G350800/TraesCS6B02G366400	4	BP
GO:0000245	spliceosomal complex assembly	5/3745	119/107890	0.397113	0.832227	0.781026	TraesCS6D02G197000/TraesCS6D02G182200/TraesCS6B02G231100/TraesCS6B02G230500/TraesCS6B02G415500	5	BP
GO:0006405	RNA export from nucleus	16/3745	424/107890	0.402417	0.833521	0.78224	TraesCS6D02G311700/TraesCS6D02G213600/TraesCS6D02G341300/TraesCS6D02G266800/TraesCS3B02G487900/TraesCS6B02G083500/TraesCS1B02G266900/TraesCS1B02G270700/TraesCS1B02G063400/TraesCS6B02G373300/TraesCS6B02G456000/TraesCS6A02G309600/TraesCS6B02G337900/TraesCS6B02G391200/TraesCS6B02G363200/TraesCS6B02G239100	16	BP
GO:0030261	chromosome condensation	3/3745	66/107890	0.402931	0.833521	0.78224	TraesCS7D02G057500/TraesCS1B02G244100/TraesCS6B02G341400	3	BP
GO:1901661	quinone metabolic process	11/3745	285/107890	0.403264	0.833521	0.78224	TraesCS7A02G235000/TraesCS6D02G202500/TraesCS6D02G219600/TraesCS6D02G239700/TraesCS6B02G165000/TraesCS1B02G266500/TraesCS2A02G523400/TraesCS6B02G430100/TraesCS2D02G525500/TraesCS6B02G333600/TraesCS2B02G553300	11	BP
GO:0009934	regulation of meristem structural organization	4/3745	93/107890	0.404641	0.833521	0.78224	TraesCS6D02G324300/TraesCS7A02G248700/TraesCS6D02G174100/TraesCS6B02G375500	4	BP
GO:0098586	cellular response to virus	14/3745	369/107890	0.405478	0.833521	0.78224	TraesCS7A02G265300/TraesCS7A02G211100/TraesCS6D02G181800/TraesCS7A02G265200/TraesCS6D02G269400/TraesCS5D02G454200/TraesCS5B02G154600/TraesCS6B02G468200/TraesCS6B02G235400/TraesCS5B02G157800/TraesCS6B02G447600/TraesCS3D02G162700/TraesCS3D02G165900/TraesCS6B02G466700	14	BP
GO:0098661	inorganic anion transmembrane transport	14/3745	369/107890	0.405478	0.833521	0.78224	TraesCS7A02G231200/TraesCS6D02G187100/TraesCS6D02G191600/TraesCS5D02G260400/TraesCS6D02G364600/TraesCS6D02G286400/TraesCS2A02G380500/TraesCS2D02G376800/TraesCS2B02G397500/TraesCS6B02G236600/TraesCS6B02G224000/TraesCS6A02G190200/TraesCS4D02G245400/TraesCS6B02G418600	14	BP
GO:0033385	geranylgeranyl diphosphate metabolic process	2/3745	40/107890	0.406565	0.833521	0.78224	TraesCS6D02G286900/TraesCS6B02G336300	2	BP
GO:0045619	regulation of lymphocyte differentiation	2/3745	40/107890	0.406565	0.833521	0.78224	TraesCS4B02G071600/TraesCS2D02G480300	2	BP
GO:0048705	skeletal system morphogenesis	2/3745	40/107890	0.406565	0.833521	0.78224	TraesCS4B02G358500/TraesCS4D02G126400	2	BP
GO:1904668	positive regulation of ubiquitin protein ligase activity	2/3745	40/107890	0.406565	0.833521	0.78224	TraesCS6D02G354500/TraesCS6B02G402400	2	BP
GO:0006140	regulation of nucleotide metabolic process	10/3745	258/107890	0.406599	0.833521	0.78224	TraesCS6D02G232600/TraesCS7A02G270600/TraesCS7A02G263800/TraesCS6D02G204700/TraesCS6D02G219600/TraesCS1B02G266900/TraesCS6B02G377200/TraesCS6B02G415900/TraesCS4B02G175500/TraesCS4D02G305100	10	BP
GO:1903311	regulation of mRNA metabolic process	6/3745	148/107890	0.408534	0.833521	0.78224	TraesCS7A02G234600/TraesCS1B02G252100/TraesCS5B02G159400/TraesCS7B02G114200/TraesCS3A02G232500/TraesCS3D02G220700	6	BP
GO:0032273	positive regulation of protein polymerization	18/3745	482/107890	0.409542	0.833521	0.78224	TraesCS7A02G284900/TraesCS7A02G263800/TraesCS7A02G518700/TraesCS1B02G267200/TraesCS1B02G278600/TraesCS4B02G173500/TraesCS6B02G226700/TraesCS6B02G240500/TraesCS7A02G414500/TraesCS6B02G432000/TraesCS6B02G466700/TraesCS4D02G341000/TraesCS3A02G210100/TraesCS4B02G346100/TraesCS5A02G515000/TraesCS2A02G368700/TraesCS4A02G067300/TraesCS4D02G225200	18	BP
GO:0009064	glutamine family amino acid metabolic process	17/3745	454/107890	0.409638	0.833521	0.78224	TraesCS6D02G251000/TraesCS6D02G344200/TraesCS5A02G153900/TraesCS1B02G257300/TraesCS2B02G106500/TraesCS6A02G298100/TraesCS5B02G154400/TraesCS3A02G206600/TraesCS6B02G393600/TraesCS3A02G211000/TraesCS4D02G126400/TraesCS4D02G047400/TraesCS4A02G266900/TraesCS4B02G052300/TraesCS1D02G012300/TraesCS6B02G274800/TraesCS2D02G512000	17	BP
GO:0051651	maintenance of location in cell	9/3745	231/107890	0.410036	0.833521	0.78224	TraesCS7A02G271400/TraesCS6D02G241800/TraesCS1B02G252700/TraesCS6B02G224600/TraesCS6B02G417700/TraesCS5B02G155000/TraesCS6B02G344100/TraesCS1A02G416700/TraesCS7A02G420900	9	BP
GO:0080050	regulation of seed development	5/3745	121/107890	0.410878	0.833521	0.78224	TraesCS6D02G285300/TraesCS3D02G385400/TraesCS4B02G288000/TraesCS6B02G334600/TraesCS6B02G418600	5	BP
GO:0000303	response to superoxide	10/3745	259/107890	0.411259	0.833521	0.78224	TraesCS6D02G320800/TraesCS6D02G258600/TraesCS7A02G225400/TraesCS1B02G441400/TraesCS1A02G107700/TraesCS6B02G440200/TraesCS6B02G371500/TraesCS6B02G344900/TraesCS6B02G237400/TraesCS2B02G429200	10	BP
GO:0006452	translational frameshifting	1/3745	15/107890	0.411369	0.833521	0.78224	TraesCS6B02G411200	1	BP
GO:0009831	plant-type cell wall modification involved in multidimensional cell growth	1/3745	15/107890	0.411369	0.833521	0.78224	TraesCS3D02G164400	1	BP
GO:0010037	response to carbon dioxide	1/3745	15/107890	0.411369	0.833521	0.78224	TraesCS7A02G040900	1	BP
GO:0010069	zygote asymmetric cytokinesis in embryo sac	1/3745	15/107890	0.411369	0.833521	0.78224	TraesCS6B02G419000	1	BP
GO:0010441	guard cell development	1/3745	15/107890	0.411369	0.833521	0.78224	TraesCS6B02G226700	1	BP
GO:0010442	guard cell morphogenesis	1/3745	15/107890	0.411369	0.833521	0.78224	TraesCS6B02G226700	1	BP
GO:0015746	citrate transport	1/3745	15/107890	0.411369	0.833521	0.78224	TraesCS7A02G244400	1	BP
GO:0018344	protein geranylgeranylation	1/3745	15/107890	0.411369	0.833521	0.78224	TraesCS7A02G248400	1	BP
GO:0030336	negative regulation of cell migration	1/3745	15/107890	0.411369	0.833521	0.78224	TraesCS7A02G262700	1	BP
GO:0031114	regulation of microtubule depolymerization	1/3745	15/107890	0.411369	0.833521	0.78224	TraesCS3D02G164500	1	BP
GO:0034086	maintenance of sister chromatid cohesion	1/3745	15/107890	0.411369	0.833521	0.78224	TraesCS6B02G399000	1	BP
GO:0034497	protein localization to phagophore assembly site	1/3745	15/107890	0.411369	0.833521	0.78224	TraesCS6B02G386200	1	BP
GO:0042350	GDP-L-fucose biosynthetic process	1/3745	15/107890	0.411369	0.833521	0.78224	TraesCS6D02G323500	1	BP
GO:0043491	protein kinase B signaling	1/3745	15/107890	0.411369	0.833521	0.78224	TraesCS7A02G228200	1	BP
GO:0045901	positive regulation of translational elongation	1/3745	15/107890	0.411369	0.833521	0.78224	TraesCS6B02G411200	1	BP
GO:0045905	positive regulation of translational termination	1/3745	15/107890	0.411369	0.833521	0.78224	TraesCS6B02G411200	1	BP
GO:0046368	GDP-L-fucose metabolic process	1/3745	15/107890	0.411369	0.833521	0.78224	TraesCS6D02G323500	1	BP
GO:0046475	glycerophospholipid catabolic process	1/3745	15/107890	0.411369	0.833521	0.78224	TraesCS7A02G263000	1	BP
GO:0048312	intracellular distribution of mitochondria	1/3745	15/107890	0.411369	0.833521	0.78224	TraesCS6B02G387400	1	BP
GO:0048706	embryonic skeletal system development	1/3745	15/107890	0.411369	0.833521	0.78224	TraesCS4D02G126400	1	BP
GO:0070278	extracellular matrix constituent secretion	1/3745	15/107890	0.411369	0.833521	0.78224	TraesCS3B02G162400	1	BP
GO:0070920	regulation of production of small RNA involved in gene silencing by RNA	1/3745	15/107890	0.411369	0.833521	0.78224	TraesCS3D02G165900	1	BP
GO:1901004	ubiquinone-6 metabolic process	1/3745	15/107890	0.411369	0.833521	0.78224	TraesCS6B02G430100	1	BP
GO:1901006	ubiquinone-6 biosynthetic process	1/3745	15/107890	0.411369	0.833521	0.78224	TraesCS6B02G430100	1	BP
GO:1902476	chloride transmembrane transport	1/3745	15/107890	0.411369	0.833521	0.78224	TraesCS6A02G190200	1	BP
GO:2000146	negative regulation of cell motility	1/3745	15/107890	0.411369	0.833521	0.78224	TraesCS7A02G262700	1	BP
GO:0015700	arsenite transport	3/3745	67/107890	0.412286	0.834737	0.783381	TraesCS7A02G215700/TraesCS6D02G257400/TraesCS6B02G336000	3	BP
GO:0071383	cellular response to steroid hormone stimulus	13/3745	343/107890	0.413054	0.835648	0.784236	TraesCS6D02G186900/TraesCS6D02G194500/TraesCS6D02G293200/TraesCS7A02G220700/TraesCS1B02G262200/TraesCS1B02G255700/TraesCS4B02G288000/TraesCS7D02G176700/TraesCS6B02G223700/TraesCS6B02G388600/TraesCS6B02G343900/TraesCS6B02G240900/TraesCS5D02G225200	13	BP
GO:1901071	glucosamine-containing compound metabolic process	8/3745	204/107890	0.413575	0.836058	0.784621	TraesCS6D02G190500/TraesCS6D02G199500/TraesCS3D02G366500/TraesCS6B02G470000/TraesCS4D02G126400/TraesCS4D02G142000/TraesCS3A02G312500/TraesCS2A02G350900	8	BP
GO:0071902	positive regulation of protein serine/threonine kinase activity	10/3745	260/107890	0.41592	0.840152	0.788463	TraesCS6D02G332100/TraesCS6D02G328800/TraesCS5B02G154600/TraesCS4B02G116000/TraesCS6B02G362300/TraesCS4B02G115800/TraesCS6B02G382700/TraesCS6B02G352700/TraesCS6B02G379500/TraesCS6B02G358800	10	BP
GO:0045930	negative regulation of mitotic cell cycle	11/3745	288/107890	0.416539	0.840757	0.789031	TraesCS6D02G195300/TraesCS6D02G191700/TraesCS6D02G305800/TraesCS7A02G214200/TraesCS6D02G233200/TraesCS6D02G327000/TraesCS4B02G308700/TraesCS6A02G309600/TraesCS6B02G356400/TraesCS6B02G236700/TraesCS7B02G114200	11	BP
GO:0006862	nucleotide transport	14/3745	372/107890	0.417141	0.841325	0.789563	TraesCS7A02G262400/TraesCS6D02G187100/TraesCS6D02G298000/TraesCS2A02G380500/TraesCS2D02G376800/TraesCS2B02G397500/TraesCS4B02G119700/TraesCS6B02G234200/TraesCS3A02G206300/TraesCS6B02G224000/TraesCS4B02G120800/TraesCS4D02G245400/TraesCS3B02G441200/TraesCS6B02G349000	14	BP
GO:0010112	regulation of systemic acquired resistance	5/3745	122/107890	0.417743	0.841894	0.790098	TraesCS6D02G196000/TraesCS5B02G153300/TraesCS6D02G080500/TraesCS6A02G091700/TraesCS1D02G233800	5	BP
GO:0010206	photosystem II repair	2/3745	41/107890	0.418719	0.841908	0.79011	TraesCS1B02G261800/TraesCS6B02G337900	2	BP
GO:0046660	female sex differentiation	2/3745	41/107890	0.418719	0.841908	0.79011	TraesCS6B02G421000/TraesCS2B02G594400	2	BP
GO:0090322	regulation of superoxide metabolic process	2/3745	41/107890	0.418719	0.841908	0.79011	TraesCS6D02G320800/TraesCS6B02G371500	2	BP
GO:0048545	response to steroid hormone	15/3745	401/107890	0.420816	0.841908	0.79011	TraesCS6D02G186900/TraesCS6D02G194500/TraesCS6D02G293200/TraesCS7B02G283000/TraesCS7A02G220700/TraesCS1B02G262200/TraesCS1B02G255700/TraesCS4B02G288000/TraesCS7D02G176700/TraesCS6B02G223700/TraesCS6B02G432600/TraesCS6B02G388600/TraesCS6B02G343900/TraesCS6B02G240900/TraesCS5D02G225200	15	BP
GO:0045185	maintenance of protein location	6/3745	150/107890	0.420904	0.841908	0.79011	TraesCS7A02G271400/TraesCS6D02G241800/TraesCS1B02G252700/TraesCS6B02G224600/TraesCS6B02G417700/TraesCS5B02G155000	6	BP
GO:0000731	DNA synthesis involved in DNA repair	3/3745	68/107890	0.421594	0.841908	0.79011	TraesCS6D02G357600/TraesCS3B02G289300/TraesCS6B02G411100	3	BP
GO:0008272	sulfate transport	3/3745	68/107890	0.421594	0.841908	0.79011	TraesCS5D02G260400/TraesCS2A02G496700/TraesCS6B02G342700	3	BP
GO:0009082	branched-chain amino acid biosynthetic process	3/3745	68/107890	0.421594	0.841908	0.79011	TraesCS6D02G201500/TraesCS7A02G280700/TraesCS6D02G225800	3	BP
GO:0009635	response to herbicide	3/3745	68/107890	0.421594	0.841908	0.79011	TraesCS6D02G203800/TraesCS6B02G356800/TraesCS6A02G326200	3	BP
GO:0042136	neurotransmitter biosynthetic process	3/3745	68/107890	0.421594	0.841908	0.79011	TraesCS6D02G020700/TraesCS6B02G356800/TraesCS6A02G326200	3	BP
GO:0051146	striated muscle cell differentiation	3/3745	68/107890	0.421594	0.841908	0.79011	TraesCS7A02G262700/TraesCS7A02G275500/TraesCS4D02G126400	3	BP
GO:0051352	negative regulation of ligase activity	3/3745	68/107890	0.421594	0.841908	0.79011	TraesCS6D02G195300/TraesCS6D02G233200/TraesCS6D02G327000	3	BP
GO:0008285	negative regulation of cell population proliferation	7/3745	178/107890	0.422874	0.843076	0.791207	TraesCS6D02G300700/TraesCS7A02G207400/TraesCS1D02G081300/TraesCS6B02G351700/TraesCS3A02G209700/TraesCS7D02G522100/TraesCS7B02G114400	7	BP
GO:0009229	thiamine diphosphate biosynthetic process	2/3745	42/107890	0.430744	0.843076	0.791207	TraesCS1B02G245400/TraesCS6B02G333700	2	BP
GO:0009964	negative regulation of flavonoid biosynthetic process	2/3745	42/107890	0.430744	0.843076	0.791207	TraesCS2A02G481500/TraesCS2B02G507700	2	BP
GO:0031330	negative regulation of cellular catabolic process	2/3745	42/107890	0.430744	0.843076	0.791207	TraesCS6D02G187100/TraesCS7B02G114200	2	BP
GO:0042357	thiamine diphosphate metabolic process	2/3745	42/107890	0.430744	0.843076	0.791207	TraesCS1B02G245400/TraesCS6B02G333700	2	BP
GO:0006821	chloride transport	3/3745	69/107890	0.430852	0.843076	0.791207	TraesCS7A02G240700/TraesCS6A02G190200/TraesCS6B02G419400	3	BP
GO:0010720	positive regulation of cell development	3/3745	69/107890	0.430852	0.843076	0.791207	TraesCS6D02G294500/TraesCS6D02G379500/TraesCS6B02G345700	3	BP
GO:0009861	jasmonic acid and ethylene-dependent systemic resistance	5/3745	124/107890	0.431432	0.843076	0.791207	TraesCS2D02G037300/TraesCS6B02G358000/TraesCS7B02G261800/TraesCS3A02G312500/TraesCS4D02G121300	5	BP
GO:0000461	endonucleolytic cleavage to generate mature 3'-end of SSU-rRNA from (SSU-rRNA, 5.8S rRNA, LSU-rRNA)	1/3745	16/107890	0.431804	0.843076	0.791207	TraesCS4D02G167600	1	BP
GO:0006208	pyrimidine nucleobase catabolic process	1/3745	16/107890	0.431804	0.843076	0.791207	TraesCS4D02G145000	1	BP
GO:0006556	S-adenosylmethionine biosynthetic process	1/3745	16/107890	0.431804	0.843076	0.791207	TraesCS6B02G455100	1	BP
GO:0007351	tripartite regional subdivision	1/3745	16/107890	0.431804	0.843076	0.791207	TraesCS4D02G305100	1	BP
GO:0007492	endoderm development	1/3745	16/107890	0.431804	0.843076	0.791207	TraesCS6B02G350800	1	BP
GO:0008595	anterior/posterior axis specification, embryo	1/3745	16/107890	0.431804	0.843076	0.791207	TraesCS4D02G305100	1	BP
GO:0009948	anterior/posterior axis specification	1/3745	16/107890	0.431804	0.843076	0.791207	TraesCS4D02G305100	1	BP
GO:0010070	zygote asymmetric cell division	1/3745	16/107890	0.431804	0.843076	0.791207	TraesCS6B02G419000	1	BP
GO:0015744	succinate transport	1/3745	16/107890	0.431804	0.843076	0.791207	TraesCS7A02G244400	1	BP
GO:0015759	beta-glucoside transport	1/3745	16/107890	0.431804	0.843076	0.791207	TraesCS6B02G456500	1	BP
GO:0019441	tryptophan catabolic process to kynurenine	1/3745	16/107890	0.431804	0.843076	0.791207	TraesCS5B02G158200	1	BP
GO:0019860	uracil metabolic process	1/3745	16/107890	0.431804	0.843076	0.791207	TraesCS4D02G145000	1	BP
GO:0033356	UDP-L-arabinose metabolic process	1/3745	16/107890	0.431804	0.843076	0.791207	TraesCS7A02G419300	1	BP
GO:0042218	1-aminocyclopropane-1-carboxylate biosynthetic process	1/3745	16/107890	0.431804	0.843076	0.791207	TraesCS2A02G396400	1	BP
GO:0042948	salicin transport	1/3745	16/107890	0.431804	0.843076	0.791207	TraesCS6B02G456500	1	BP
GO:0043270	positive regulation of ion transport	1/3745	16/107890	0.431804	0.843076	0.791207	TraesCS5B02G156800	1	BP
GO:0043279	response to alkaloid	1/3745	16/107890	0.431804	0.843076	0.791207	TraesCS2B02G429300	1	BP
GO:0048762	mesenchymal cell differentiation	1/3745	16/107890	0.431804	0.843076	0.791207	TraesCS6B02G350800	1	BP
GO:0051271	negative regulation of cellular component movement	1/3745	16/107890	0.431804	0.843076	0.791207	TraesCS7A02G262700	1	BP
GO:0051973	positive regulation of telomerase activity	1/3745	16/107890	0.431804	0.843076	0.791207	TraesCS2D02G339900	1	BP
GO:0070189	kynurenine metabolic process	1/3745	16/107890	0.431804	0.843076	0.791207	TraesCS5B02G158200	1	BP
GO:0071422	succinate transmembrane transport	1/3745	16/107890	0.431804	0.843076	0.791207	TraesCS7A02G244400	1	BP
GO:0018108	peptidyl-tyrosine phosphorylation	11/3745	292/107890	0.434239	0.844506	0.792549	TraesCS6D02G383800/TraesCS6D02G336200/TraesCS2B02G358500/TraesCS4B02G121600/TraesCS6A02G037600/TraesCSU02G037800/TraesCS6B02G439800/TraesCS6B02G451000/TraesCS6B02G386600/TraesCS2B02G429800/TraesCS2B02G429900	11	BP
GO:0046164	alcohol catabolic process	11/3745	292/107890	0.434239	0.844506	0.792549	TraesCS6D02G195700/TraesCS6D02G331100/TraesCS5D02G080200/TraesCS7A02G226000/TraesCS1B02G270000/TraesCS6A02G271300/TraesCS6B02G374700/TraesCS3A02G408700/TraesCS6B02G298500/TraesCS6B02G331600/TraesCS6B02G330300	11	BP
GO:0010639	negative regulation of organelle organization	10/3745	264/107890	0.434551	0.844506	0.792549	TraesCS6D02G191700/TraesCS6D02G233200/TraesCS6D02G196000/TraesCS6D02G327000/TraesCS4A02G372200/TraesCS7D02G069700/TraesCS7A02G074600/TraesCS4B02G308700/TraesCS6A02G309600/TraesCS6B02G236700	10	BP
GO:0048736	appendage development	4/3745	97/107890	0.435861	0.844506	0.792549	TraesCS7A02G262700/TraesCS7A02G465800/TraesCS2D02G480300/TraesCS6B02G335200	4	BP
GO:0018212	peptidyl-tyrosine modification	11/3745	293/107890	0.438659	0.844506	0.792549	TraesCS6D02G383800/TraesCS6D02G336200/TraesCS2B02G358500/TraesCS4B02G121600/TraesCS6A02G037600/TraesCSU02G037800/TraesCS6B02G439800/TraesCS6B02G451000/TraesCS6B02G386600/TraesCS2B02G429800/TraesCS2B02G429900	11	BP
GO:0072524	pyridine-containing compound metabolic process	6/3745	153/107890	0.43939	0.844506	0.792549	TraesCS7A02G278400/TraesCS6D02G370600/TraesCS6D02G388700/TraesCS1B02G253900/TraesCS4D02G145000/TraesCS7B02G175800	6	BP
GO:0031349	positive regulation of defense response	7/3745	181/107890	0.439836	0.844506	0.792549	TraesCS6D02G179200/TraesCS6B02G235200/TraesCS6B02G281000/TraesCS2A02G292600/TraesCS2D02G290400/TraesCS6A02G243300/TraesCS4D02G121300	7	BP
GO:0007369	gastrulation	3/3745	70/107890	0.440055	0.844506	0.792549	TraesCS7A02G227400/TraesCS6B02G350800/TraesCS4B02G348300	3	BP
GO:0019253	reductive pentose-phosphate cycle	3/3745	70/107890	0.440055	0.844506	0.792549	TraesCS2D02G034400/TraesCS2B02G048200/TraesCS2D02G065200	3	BP
GO:0030099	myeloid cell differentiation	3/3745	70/107890	0.440055	0.844506	0.792549	TraesCS4D02G145700/TraesCS6B02G350800/TraesCS6B02G387300	3	BP
GO:0043010	camera-type eye development	3/3745	70/107890	0.440055	0.844506	0.792549	TraesCS6D02G195300/TraesCS6D02G302200/TraesCS6B02G353100	3	BP
GO:0002097	tRNA wobble base modification	2/3745	43/107890	0.442636	0.844506	0.792549	TraesCS7A02G231400/TraesCS6B02G333000	2	BP
GO:0006122	mitochondrial electron transport, ubiquinol to cytochrome c	2/3745	43/107890	0.442636	0.844506	0.792549	TraesCS3A02G405000/TraesCS7B02G175500	2	BP
GO:0007128	meiotic prophase I	2/3745	43/107890	0.442636	0.844506	0.792549	TraesCS7A02G233700/TraesCS3D02G164600	2	BP
GO:1902105	regulation of leukocyte differentiation	2/3745	43/107890	0.442636	0.844506	0.792549	TraesCS4B02G071600/TraesCS2D02G480300	2	BP
GO:0000305	response to oxygen radical	11/3745	294/107890	0.443078	0.844506	0.792549	TraesCS6D02G320800/TraesCS6D02G258600/TraesCS7A02G225400/TraesCS1B02G441400/TraesCS1A02G107700/TraesCS6B02G440200/TraesCS6B02G423100/TraesCS6B02G371500/TraesCS6B02G344900/TraesCS6B02G237400/TraesCS2B02G429200	11	BP
GO:0006536	glutamate metabolic process	4/3745	98/107890	0.443596	0.844506	0.792549	TraesCS6D02G344200/TraesCS6B02G393600/TraesCS3A02G211000/TraesCS4B02G052300	4	BP
GO:0009960	endosperm development	4/3745	98/107890	0.443596	0.844506	0.792549	TraesCS6B02G335200/TraesCS6B02G455400/TraesCS6B02G356900/TraesCS6B02G418600	4	BP
GO:0015807	L-amino acid transport	4/3745	98/107890	0.443596	0.844506	0.792549	TraesCS6D02G336100/TraesCS6D02G226700/TraesCS6B02G386500/TraesCS4B02G139700	4	BP
GO:0009740	gibberellic acid mediated signaling pathway	16/3745	436/107890	0.445901	0.844506	0.792549	TraesCS7A02G247900/TraesCS7A02G270900/TraesCS3A02G122600/TraesCS7A02G225700/TraesCS3D02G385400/TraesCS6A02G334000/TraesCS1B02G265900/TraesCS2D02G442200/TraesCS5D02G467200/TraesCS2A02G288700/TraesCS6B02G366900/TraesCS6B02G338000/TraesCS3D02G161900/TraesCS6B02G429500/TraesCS4D02G269000/TraesCS3D02G403000	16	BP
GO:0030587	sorocarp development	3/3745	71/107890	0.4492	0.844506	0.792549	TraesCS6D02G373500/TraesCS3A02G211000/TraesCS6B02G403400	3	BP
GO:0090702	non-reproductive fruiting body development	3/3745	71/107890	0.4492	0.844506	0.792549	TraesCS6D02G373500/TraesCS3A02G211000/TraesCS6B02G403400	3	BP
GO:0099120	socially cooperative development	3/3745	71/107890	0.4492	0.844506	0.792549	TraesCS6D02G373500/TraesCS3A02G211000/TraesCS6B02G403400	3	BP
GO:0010476	gibberellin mediated signaling pathway	16/3745	437/107890	0.449525	0.844506	0.792549	TraesCS7A02G247900/TraesCS7A02G270900/TraesCS3A02G122600/TraesCS7A02G225700/TraesCS3D02G385400/TraesCS6A02G334000/TraesCS1B02G265900/TraesCS2D02G442200/TraesCS5D02G467200/TraesCS2A02G288700/TraesCS6B02G366900/TraesCS6B02G338000/TraesCS3D02G161900/TraesCS6B02G429500/TraesCS4D02G269000/TraesCS3D02G403000	16	BP
GO:0046348	amino sugar catabolic process	7/3745	183/107890	0.4511	0.844506	0.792549	TraesCS6D02G190500/TraesCS6D02G199500/TraesCS3D02G366500/TraesCS6B02G470000/TraesCS4D02G142000/TraesCS3A02G312500/TraesCS2A02G350900	7	BP
GO:1901072	glucosamine-containing compound catabolic process	7/3745	183/107890	0.4511	0.844506	0.792549	TraesCS6D02G190500/TraesCS6D02G199500/TraesCS3D02G366500/TraesCS6B02G470000/TraesCS4D02G142000/TraesCS3A02G312500/TraesCS2A02G350900	7	BP
GO:0019362	pyridine nucleotide metabolic process	4/3745	99/107890	0.451299	0.844506	0.792549	TraesCS7A02G278400/TraesCS6D02G370600/TraesCS1B02G253900/TraesCS7B02G175800	4	BP
GO:0042770	signal transduction in response to DNA damage	4/3745	99/107890	0.451299	0.844506	0.792549	TraesCS6D02G195300/TraesCS6D02G305800/TraesCS6B02G334400/TraesCS6B02G356400	4	BP
GO:0002576	platelet degranulation	1/3745	17/107890	0.45153	0.844506	0.792549	TraesCS3A02G205700	1	BP
GO:0006883	cellular sodium ion homeostasis	1/3745	17/107890	0.45153	0.844506	0.792549	TraesCS6D02G203800	1	BP
GO:0006919	activation of cysteine-type endopeptidase activity involved in apoptotic process	1/3745	17/107890	0.45153	0.844506	0.792549	TraesCS6B02G335200	1	BP
GO:0007019	microtubule depolymerization	1/3745	17/107890	0.45153	0.844506	0.792549	TraesCS3D02G164500	1	BP
GO:0010270	photosystem II oxygen evolving complex assembly	1/3745	17/107890	0.45153	0.844506	0.792549	TraesCS6B02G390600	1	BP
GO:0010458	exit from mitosis	1/3745	17/107890	0.45153	0.844506	0.792549	TraesCS6D02G233200	1	BP
GO:0016120	carotene biosynthetic process	1/3745	17/107890	0.45153	0.844506	0.792549	TraesCS3A02G208800	1	BP
GO:0019408	dolichol biosynthetic process	1/3745	17/107890	0.45153	0.844506	0.792549	TraesCS6B02G352400	1	BP
GO:0032309	icosanoid secretion	1/3745	17/107890	0.45153	0.844506	0.792549	TraesCS4D02G217600	1	BP
GO:0034502	protein localization to chromosome	1/3745	17/107890	0.45153	0.844506	0.792549	TraesCS6D02G207900	1	BP
GO:0034763	negative regulation of transmembrane transport	1/3745	17/107890	0.45153	0.844506	0.792549	TraesCS5B02G155200	1	BP
GO:0042946	glucoside transport	1/3745	17/107890	0.45153	0.844506	0.792549	TraesCS6B02G456500	1	BP
GO:0043280	positive regulation of cysteine-type endopeptidase activity involved in apoptotic process	1/3745	17/107890	0.45153	0.844506	0.792549	TraesCS6B02G335200	1	BP
GO:0043617	cellular response to sucrose starvation	1/3745	17/107890	0.45153	0.844506	0.792549	TraesCS5A02G153900	1	BP
GO:0045053	protein retention in Golgi apparatus	1/3745	17/107890	0.45153	0.844506	0.792549	TraesCS6B02G224600	1	BP
GO:0046102	inosine metabolic process	1/3745	17/107890	0.45153	0.844506	0.792549	TraesCS7B02G176500	1	BP
GO:0046717	acid secretion	1/3745	17/107890	0.45153	0.844506	0.792549	TraesCS4D02G217600	1	BP
GO:0050482	arachidonic acid secretion	1/3745	17/107890	0.45153	0.844506	0.792549	TraesCS4D02G217600	1	BP
GO:0051961	negative regulation of nervous system development	1/3745	17/107890	0.45153	0.844506	0.792549	TraesCS7A02G228200	1	BP
GO:0052695	cellular glucuronidation	1/3745	17/107890	0.45153	0.844506	0.792549	TraesCS7A02G219200	1	BP
GO:0052696	flavonoid glucuronidation	1/3745	17/107890	0.45153	0.844506	0.792549	TraesCS7A02G219200	1	BP
GO:0061418	regulation of transcription from RNA polymerase II promoter in response to hypoxia	1/3745	17/107890	0.45153	0.844506	0.792549	TraesCS6D02G254700	1	BP
GO:0071715	icosanoid transport	1/3745	17/107890	0.45153	0.844506	0.792549	TraesCS4D02G217600	1	BP
GO:0097202	activation of cysteine-type endopeptidase activity	1/3745	17/107890	0.45153	0.844506	0.792549	TraesCS6B02G335200	1	BP
GO:1900151	regulation of nuclear-transcribed mRNA catabolic process, deadenylation-dependent decay	1/3745	17/107890	0.45153	0.844506	0.792549	TraesCS5B02G159400	1	BP
GO:1901571	fatty acid derivative transport	1/3745	17/107890	0.45153	0.844506	0.792549	TraesCS4D02G217600	1	BP
GO:1901656	glycoside transport	1/3745	17/107890	0.45153	0.844506	0.792549	TraesCS6B02G456500	1	BP
GO:1903963	arachidonate transport	1/3745	17/107890	0.45153	0.844506	0.792549	TraesCS4D02G217600	1	BP
GO:2001056	positive regulation of cysteine-type endopeptidase activity	1/3745	17/107890	0.45153	0.844506	0.792549	TraesCS6B02G335200	1	BP
GO:2001293	malonyl-CoA metabolic process	1/3745	17/107890	0.45153	0.844506	0.792549	TraesCS7A02G256900	1	BP
GO:0071345	cellular response to cytokine stimulus	5/3745	127/107890	0.451831	0.844506	0.792549	TraesCS6A02G406200/TraesCS6B02G350800/TraesCS4D02G341000/TraesCS4B02G346100/TraesCS5A02G515000	5	BP
GO:1902652	secondary alcohol metabolic process	5/3745	127/107890	0.451831	0.844506	0.792549	TraesCS6D02G192900/TraesCS7A02G219100/TraesCS6B02G440200/TraesCS6B02G235000/TraesCS6B02G238500	5	BP
GO:0009880	embryonic pattern specification	9/3745	240/107890	0.454362	0.844506	0.792549	TraesCS6D02G378300/TraesCS6D02G186900/TraesCS1B02G238200/TraesCS6B02G223700/TraesCS6B02G356900/TraesCS6B02G432800/TraesCS6B02G466700/TraesCS3A02G210100/TraesCS4D02G305100	9	BP
GO:0010508	positive regulation of autophagy	2/3745	44/107890	0.454388	0.844506	0.792549	TraesCS5A02G548000/TraesCS1D02G072900	2	BP
GO:0032868	response to insulin	2/3745	44/107890	0.454388	0.844506	0.792549	TraesCS6B02G452200/TraesCS6B02G229000	2	BP
GO:0035114	imaginal disc-derived appendage morphogenesis	2/3745	44/107890	0.454388	0.844506	0.792549	TraesCS2D02G480300/TraesCS6B02G335200	2	BP
GO:0050879	multicellular organismal movement	2/3745	44/107890	0.454388	0.844506	0.792549	TraesCS6D02G290800/TraesCS6B02G341700	2	BP
GO:0070206	protein trimerization	2/3745	44/107890	0.454388	0.844506	0.792549	TraesCS2D02G534500/TraesCS2A02G532700	2	BP
GO:0072529	pyrimidine-containing compound catabolic process	2/3745	44/107890	0.454388	0.844506	0.792549	TraesCS4D02G145000/TraesCS7B02G176500	2	BP
GO:0098764	meiosis I cell cycle phase	2/3745	44/107890	0.454388	0.844506	0.792549	TraesCS7A02G233700/TraesCS3D02G164600	2	BP
GO:0016226	iron-sulfur cluster assembly	17/3745	467/107890	0.45528	0.844901	0.79292	TraesCS6D02G337500/TraesCS7A02G213900/TraesCS6D02G202300/TraesCS6D02G220400/TraesCS6D02G274600/TraesCS6D02G275700/TraesCS6D02G227700/TraesCS6D02G314600/TraesCS1B02G254000/TraesCS1B02G255100/TraesCS6B02G224200/TraesCS6B02G388100/TraesCS6B02G386400/TraesCS7B02G176100/TraesCS6B02G365700/TraesCS5B02G260200/TraesCS5D02G269400	17	BP
GO:0031163	metallo-sulfur cluster assembly	17/3745	467/107890	0.45528	0.844901	0.79292	TraesCS6D02G337500/TraesCS7A02G213900/TraesCS6D02G202300/TraesCS6D02G220400/TraesCS6D02G274600/TraesCS6D02G275700/TraesCS6D02G227700/TraesCS6D02G314600/TraesCS1B02G254000/TraesCS1B02G255100/TraesCS6B02G224200/TraesCS6B02G388100/TraesCS6B02G386400/TraesCS7B02G176100/TraesCS6B02G365700/TraesCS5B02G260200/TraesCS5D02G269400	17	BP
GO:0030148	sphingolipid biosynthetic process	8/3745	212/107890	0.455565	0.844901	0.79292	TraesCS7A02G255400/TraesCS3D02G057400/TraesCS6D02G210300/TraesCS6B02G241000/TraesCS6B02G335400/TraesCS3A02G207900/TraesCS5D02G199900/TraesCS6B02G257400	8	BP
GO:0018904	ether metabolic process	7/3745	184/107890	0.456716	0.846438	0.794362	TraesCS6D02G259000/TraesCS6D02G379700/TraesCS6A02G323100/TraesCS7A02G067700/TraesCS6B02G409800/TraesCS6B02G434200/TraesCS4B02G174100	7	BP
GO:0046653	tetrahydrofolate metabolic process	3/3745	72/107890	0.458283	0.848147	0.795965	TraesCS7A02G276800/TraesCS7A02G276900/TraesCS3D02G167700	3	BP
GO:0071249	cellular response to nitrate	3/3745	72/107890	0.458283	0.848147	0.795965	TraesCS6D02G294600/TraesCS5B02G158800/TraesCS6B02G345800	3	BP
GO:1900140	regulation of seedling development	17/3745	468/107890	0.458787	0.848481	0.796279	TraesCS6D02G184500/TraesCS6D02G216600/TraesCS3D02G385400/TraesCS1B02G441400/TraesCS6D02G220700/TraesCS2A02G288700/TraesCS3A02G210600/TraesCS6B02G367800/TraesCS3A02G209200/TraesCS6B02G230000/TraesCS5B02G244000/TraesCS6B02G334900/TraesCS6B02G342700/TraesCS5D02G253400/TraesCS7D02G364600/TraesCS7A02G358200/TraesCS7B02G269600	17	BP
GO:0071370	cellular response to gibberellin stimulus	16/3745	440/107890	0.460386	0.85084	0.798493	TraesCS7A02G247900/TraesCS7A02G270900/TraesCS3A02G122600/TraesCS7A02G225700/TraesCS3D02G385400/TraesCS6A02G334000/TraesCS1B02G265900/TraesCS2D02G442200/TraesCS5D02G467200/TraesCS2A02G288700/TraesCS6B02G366900/TraesCS6B02G338000/TraesCS3D02G161900/TraesCS6B02G429500/TraesCS4D02G269000/TraesCS3D02G403000	16	BP
GO:0000187	activation of MAPK activity	2/3745	45/107890	0.465996	0.852281	0.799846	TraesCS6D02G328800/TraesCS6B02G379500	2	BP
GO:0009092	homoserine metabolic process	2/3745	45/107890	0.465996	0.852281	0.799846	TraesCS5B02G158700/TraesCS6B02G467000	2	BP
GO:0010375	stomatal complex patterning	2/3745	45/107890	0.465996	0.852281	0.799846	TraesCS6D02G328800/TraesCS6B02G379500	2	BP
GO:0051324	prophase	2/3745	45/107890	0.465996	0.852281	0.799846	TraesCS7A02G233700/TraesCS3D02G164600	2	BP
GO:0072525	pyridine-containing compound biosynthetic process	4/3745	101/107890	0.466598	0.852281	0.799846	TraesCS7A02G278400/TraesCS6D02G370600/TraesCS1B02G253900/TraesCS7B02G175800	4	BP
GO:0019685	photosynthesis, dark reaction	3/3745	73/107890	0.467302	0.852281	0.799846	TraesCS2D02G034400/TraesCS2B02G048200/TraesCS2D02G065200	3	BP
GO:0030155	regulation of cell adhesion	3/3745	73/107890	0.467302	0.852281	0.799846	TraesCS7A02G221500/TraesCS6B02G241000/TraesCS6B02G366900	3	BP
GO:0030308	negative regulation of cell growth	3/3745	73/107890	0.467302	0.852281	0.799846	TraesCS3D02G164500/TraesCS3D02G220700/TraesCS3D02G505500	3	BP
GO:0042138	meiotic DNA double-strand break formation	11/3745	300/107890	0.469503	0.852281	0.799846	TraesCS7A02G255400/TraesCS6D02G315400/TraesCS6D02G196000/TraesCS7A02G247500/TraesCS6D02G341400/TraesCS1B02G328200/TraesCS6D02G229100/TraesCS5A02G099700/TraesCS6B02G333700/TraesCS6B02G366400/TraesCS6B02G356900	11	BP
GO:0051129	negative regulation of cellular component organization	11/3745	300/107890	0.469503	0.852281	0.799846	TraesCS6D02G191700/TraesCS6D02G233200/TraesCS6D02G196000/TraesCS6D02G327000/TraesCS4A02G372200/TraesCS7D02G069700/TraesCS7A02G074600/TraesCS4B02G308700/TraesCS3D02G164500/TraesCS6A02G309600/TraesCS6B02G236700	11	BP
GO:0000389	mRNA 3'-splice site recognition	1/3745	18/107890	0.470571	0.852281	0.799846	TraesCS6D02G197000	1	BP
GO:0006045	N-acetylglucosamine biosynthetic process	1/3745	18/107890	0.470571	0.852281	0.799846	TraesCS4D02G126400	1	BP
GO:0006430	lysyl-tRNA aminoacylation	1/3745	18/107890	0.470571	0.852281	0.799846	TraesCS4B02G033800	1	BP
GO:0006449	regulation of translational termination	1/3745	18/107890	0.470571	0.852281	0.799846	TraesCS6B02G411200	1	BP
GO:0006751	glutathione catabolic process	1/3745	18/107890	0.470571	0.852281	0.799846	TraesCS6B02G337600	1	BP
GO:0010390	histone monoubiquitination	1/3745	18/107890	0.470571	0.852281	0.799846	TraesCS6B02G350800	1	BP
GO:0016539	intein-mediated protein splicing	1/3745	18/107890	0.470571	0.852281	0.799846	TraesCS6D02G232000	1	BP
GO:0030900	forebrain development	1/3745	18/107890	0.470571	0.852281	0.799846	TraesCS7A02G262700	1	BP
GO:0030908	protein splicing	1/3745	18/107890	0.470571	0.852281	0.799846	TraesCS6D02G232000	1	BP
GO:0034724	DNA replication-independent nucleosome organization	1/3745	18/107890	0.470571	0.852281	0.799846	TraesCS1A02G246000	1	BP
GO:0045055	regulated exocytosis	1/3745	18/107890	0.470571	0.852281	0.799846	TraesCS3A02G205700	1	BP
GO:0046108	uridine metabolic process	1/3745	18/107890	0.470571	0.852281	0.799846	TraesCS7B02G176500	1	BP
GO:0046473	phosphatidic acid metabolic process	1/3745	18/107890	0.470571	0.852281	0.799846	TraesCS5B02G525600	1	BP
GO:0051446	positive regulation of meiotic cell cycle	1/3745	18/107890	0.470571	0.852281	0.799846	TraesCS6B02G233700	1	BP
GO:0051984	positive regulation of chromosome segregation	1/3745	18/107890	0.470571	0.852281	0.799846	TraesCS6B02G356900	1	BP
GO:0060003	copper ion export	1/3745	18/107890	0.470571	0.852281	0.799846	TraesCS2B02G429200	1	BP
GO:0071493	cellular response to UV-B	1/3745	18/107890	0.470571	0.852281	0.799846	TraesCS4B02G108400	1	BP
GO:1901073	glucosamine-containing compound biosynthetic process	1/3745	18/107890	0.470571	0.852281	0.799846	TraesCS4D02G126400	1	BP
GO:1901679	nucleotide transmembrane transport	1/3745	18/107890	0.470571	0.852281	0.799846	TraesCS3A02G206300	1	BP
GO:0001522	pseudouridine synthesis	5/3745	130/107890	0.472029	0.853229	0.800735	TraesCS6D02G269300/TraesCS6D02G207200/TraesCS6D02G234300/TraesCS6D02G204400/TraesCS7A02G252400	5	BP
GO:0009704	de-etiolation	7/3745	187/107890	0.473487	0.853229	0.800735	TraesCS6D02G271900/TraesCS6D02G202300/TraesCS3A02G437400/TraesCS4B02G151300/TraesCS6B02G429600/TraesCS1A02G186200/TraesCS7D02G131600	7	BP
GO:0015693	magnesium ion transport	4/3745	102/107890	0.474189	0.853229	0.800735	TraesCS1B02G275400/TraesCS4D02G146900/TraesCS3A02G207100/TraesCS6B02G340400	4	BP
GO:0018105	peptidyl-serine phosphorylation	3/3745	74/107890	0.476253	0.853229	0.800735	TraesCS6D02G241800/TraesCS3A02G190700/TraesCS6B02G413500	3	BP
GO:0042343	indole glucosinolate metabolic process	3/3745	74/107890	0.476253	0.853229	0.800735	TraesCS5B02G155400/TraesCS5B02G155600/TraesCS7B02G271600	3	BP
GO:0009394	2'-deoxyribonucleotide metabolic process	2/3745	46/107890	0.477456	0.853229	0.800735	TraesCS7B02G119100/TraesCS6B02G381500	2	BP
GO:0009939	positive regulation of gibberellic acid mediated signaling pathway	2/3745	46/107890	0.477456	0.853229	0.800735	TraesCS1B02G265900/TraesCS6B02G429500	2	BP
GO:0045815	positive regulation of gene expression, epigenetic	2/3745	46/107890	0.477456	0.853229	0.800735	TraesCS7A02G114000/TraesCS7D02G109300	2	BP
GO:0048833	specification of floral organ number	2/3745	46/107890	0.477456	0.853229	0.800735	TraesCS7A02G260600/TraesCS3A02G434900	2	BP
GO:0052543	callose deposition in cell wall	11/3745	302/107890	0.478267	0.853229	0.800735	TraesCS6D02G191600/TraesCS6D02G293200/TraesCS7B02G009900/TraesCS5D02G467200/TraesCS7D02G176700/TraesCS6B02G468200/TraesCS5B02G155400/TraesCS6B02G236600/TraesCS6B02G343900/TraesCS5B02G155600/TraesCS7B02G271600	11	BP
GO:0032880	regulation of protein localization	9/3745	245/107890	0.478777	0.853229	0.800735	TraesCS6D02G202000/TraesCS7A02G208000/TraesCS6D02G241800/TraesCS1B02G252700/TraesCS1B02G266500/TraesCS6B02G354300/TraesCS3A02G208600/TraesCS4A02G158100/TraesCS6B02G396200	9	BP
GO:1901988	negative regulation of cell cycle phase transition	9/3745	245/107890	0.478777	0.853229	0.800735	TraesCS6D02G195300/TraesCS6D02G191700/TraesCS6D02G305800/TraesCS6D02G233200/TraesCS6D02G327000/TraesCS4B02G308700/TraesCS6A02G309600/TraesCS6B02G356400/TraesCS6B02G236700	9	BP
GO:1901991	negative regulation of mitotic cell cycle phase transition	9/3745	245/107890	0.478777	0.853229	0.800735	TraesCS6D02G195300/TraesCS6D02G191700/TraesCS6D02G305800/TraesCS6D02G233200/TraesCS6D02G327000/TraesCS4B02G308700/TraesCS6A02G309600/TraesCS6B02G356400/TraesCS6B02G236700	9	BP
GO:0009610	response to symbiotic fungus	7/3745	188/107890	0.479048	0.853229	0.800735	TraesCS6D02G254000/TraesCS6D02G020700/TraesCS1B02G441400/TraesCS6B02G334300/TraesCS3A02G209200/TraesCS6B02G356800/TraesCS6A02G326200	7	BP
GO:0010048	vernalization response	10/3745	274/107890	0.480839	0.853229	0.800735	TraesCS7A02G266100/TraesCS7A02G284900/TraesCS6D02G207800/TraesCS1A02G199900/TraesCS3A02G432900/TraesCS3D02G427900/TraesCS3A02G434900/TraesCS7D02G261900/TraesCS3D02G428000/TraesCS7B02G158900	10	BP
GO:0030435	sporulation resulting in formation of a cellular spore	8/3745	217/107890	0.481541	0.853229	0.800735	TraesCS6D02G216400/TraesCS7A02G275500/TraesCS3A02G211000/TraesCS4D02G212300/TraesCS4B02G212300/TraesCS3D02G045500/TraesCS3B02G049900/TraesCS7A02G394700	8	BP
GO:0015977	carbon fixation	4/3745	103/107890	0.481739	0.853229	0.800735	TraesCS6D02G183200/TraesCS2D02G034400/TraesCS2B02G048200/TraesCS2D02G065200	4	BP
GO:0009410	response to xenobiotic stimulus	11/3745	303/107890	0.482638	0.853229	0.800735	TraesCS7A02G268700/TraesCS6D02G291000/TraesCS3B02G034800/TraesCS1B02G268500/TraesCS3A02G190700/TraesCS6B02G455100/TraesCS4B02G175800/TraesCS6B02G341900/TraesCS2B02G429300/TraesCS7B02G114300/TraesCS4B02G320400	11	BP
GO:0045165	cell fate commitment	11/3745	303/107890	0.482638	0.853229	0.800735	TraesCS7A02G260600/TraesCS6D02G220400/TraesCS3A02G434900/TraesCS6B02G366900/TraesCS3D02G163900/TraesCS6B02G447600/TraesCS6B02G350800/TraesCS6B02G393100/TraesCS7A02G068000/TraesCS7D02G062100/TraesCS4D02G104300	11	BP
GO:0048441	petal development	17/3745	475/107890	0.48327	0.853229	0.800735	TraesCS7A02G245400/TraesCS7A02G260600/TraesCS6D02G304300/TraesCS6D02G212700/TraesCS6D02G356500/TraesCS6D02G208400/TraesCS2A02G251700/TraesCS3A02G434900/TraesCS1B02G252400/TraesCS5D02G454200/TraesCS6B02G354900/TraesCS6B02G366900/TraesCS6B02G333400/TraesCS6B02G233400/TraesCS6B02G410200/TraesCS4B02G118300/TraesCS5B02G158100	17	BP
GO:0048465	corolla development	17/3745	475/107890	0.48327	0.853229	0.800735	TraesCS7A02G245400/TraesCS7A02G260600/TraesCS6D02G304300/TraesCS6D02G212700/TraesCS6D02G356500/TraesCS6D02G208400/TraesCS2A02G251700/TraesCS3A02G434900/TraesCS1B02G252400/TraesCS5D02G454200/TraesCS6B02G354900/TraesCS6B02G366900/TraesCS6B02G333400/TraesCS6B02G233400/TraesCS6B02G410200/TraesCS4B02G118300/TraesCS5B02G158100	17	BP
GO:0016553	base conversion or substitution editing	3/3745	75/107890	0.485133	0.853229	0.800735	TraesCS7A02G262500/TraesCS7A02G231400/TraesCS3D02G101500	3	BP
GO:0040035	hermaphrodite genitalia development	3/3745	75/107890	0.485133	0.853229	0.800735	TraesCS6D02G190000/TraesCS4D02G128200/TraesCS6B02G225700	3	BP
GO:0000712	resolution of meiotic recombination intermediates	2/3745	47/107890	0.488764	0.853229	0.800735	TraesCS4D02G106800/TraesCS6B02G265900	2	BP
GO:0000963	mitochondrial RNA processing	2/3745	47/107890	0.488764	0.853229	0.800735	TraesCS6D02G206900/TraesCS3D02G163900	2	BP
GO:0009083	branched-chain amino acid catabolic process	2/3745	47/107890	0.488764	0.853229	0.800735	TraesCS6D02G393200/TraesCS6B02G455600	2	BP
GO:0019692	deoxyribose phosphate metabolic process	2/3745	47/107890	0.488764	0.853229	0.800735	TraesCS7B02G119100/TraesCS6B02G381500	2	BP
GO:0032365	intracellular lipid transport	2/3745	47/107890	0.488764	0.853229	0.800735	TraesCS6A02G334000/TraesCS6B02G364700	2	BP
GO:0050777	negative regulation of immune response	2/3745	47/107890	0.488764	0.853229	0.800735	TraesCS6D02G196000/TraesCS5B02G153300	2	BP
GO:0050890	cognition	2/3745	47/107890	0.488764	0.853229	0.800735	TraesCS2D02G480300/TraesCS1B02G253700	2	BP
GO:0090354	regulation of auxin metabolic process	2/3745	47/107890	0.488764	0.853229	0.800735	TraesCS6D02G241900/TraesCS6D02G251700	2	BP
GO:0003016	respiratory system process	1/3745	19/107890	0.488951	0.853229	0.800735	TraesCS6B02G425700	1	BP
GO:0006937	regulation of muscle contraction	1/3745	19/107890	0.488951	0.853229	0.800735	TraesCS6B02G344100	1	BP
GO:0009994	oocyte differentiation	1/3745	19/107890	0.488951	0.853229	0.800735	TraesCS4D02G305100	1	BP
GO:0015768	maltose transport	1/3745	19/107890	0.488951	0.853229	0.800735	TraesCS6B02G456500	1	BP
GO:0015969	guanosine tetraphosphate metabolic process	1/3745	19/107890	0.488951	0.853229	0.800735	TraesCS6D02G246800	1	BP
GO:0030073	insulin secretion	1/3745	19/107890	0.488951	0.853229	0.800735	TraesCS6B02G344100	1	BP
GO:0030643	cellular phosphate ion homeostasis	1/3745	19/107890	0.488951	0.853229	0.800735	TraesCS7A02G263000	1	BP
GO:0032527	protein exit from endoplasmic reticulum	1/3745	19/107890	0.488951	0.853229	0.800735	TraesCS5B02G054600	1	BP
GO:0034035	purine ribonucleoside bisphosphate metabolic process	1/3745	19/107890	0.488951	0.853229	0.800735	TraesCS6D02G246800	1	BP
GO:0035674	tricarboxylic acid transmembrane transport	1/3745	19/107890	0.488951	0.853229	0.800735	TraesCS7A02G244400	1	BP
GO:0042177	negative regulation of protein catabolic process	1/3745	19/107890	0.488951	0.853229	0.800735	TraesCS6D02G187100	1	BP
GO:0046133	pyrimidine ribonucleoside catabolic process	1/3745	19/107890	0.488951	0.853229	0.800735	TraesCS7B02G176500	1	BP
GO:0046339	diacylglycerol metabolic process	1/3745	19/107890	0.488951	0.853229	0.800735	TraesCS6D02G252100	1	BP
GO:0048497	maintenance of floral organ identity	1/3745	19/107890	0.488951	0.853229	0.800735	TraesCS1B02G273300	1	BP
GO:0048562	embryonic organ morphogenesis	1/3745	19/107890	0.488951	0.853229	0.800735	TraesCS4D02G126400	1	BP
GO:0048599	oocyte development	1/3745	19/107890	0.488951	0.853229	0.800735	TraesCS4D02G305100	1	BP
GO:0055078	sodium ion homeostasis	1/3745	19/107890	0.488951	0.853229	0.800735	TraesCS6D02G203800	1	BP
GO:0060191	regulation of lipase activity	1/3745	19/107890	0.488951	0.853229	0.800735	TraesCS6B02G344100	1	BP
GO:0060485	mesenchyme development	1/3745	19/107890	0.488951	0.853229	0.800735	TraesCS6B02G350800	1	BP
GO:0061687	detoxification of inorganic compound	1/3745	19/107890	0.488951	0.853229	0.800735	TraesCS2B02G429200	1	BP
GO:0071329	cellular response to sucrose stimulus	1/3745	19/107890	0.488951	0.853229	0.800735	TraesCS6B02G342700	1	BP
GO:0072501	cellular divalent inorganic anion homeostasis	1/3745	19/107890	0.488951	0.853229	0.800735	TraesCS7A02G263000	1	BP
GO:0072502	cellular trivalent inorganic anion homeostasis	1/3745	19/107890	0.488951	0.853229	0.800735	TraesCS7A02G263000	1	BP
GO:0090700	maintenance of plant organ identity	1/3745	19/107890	0.488951	0.853229	0.800735	TraesCS1B02G273300	1	BP
GO:0052386	cell wall thickening	11/3745	305/107890	0.491357	0.856859	0.804142	TraesCS6D02G191600/TraesCS6D02G293200/TraesCS7B02G009900/TraesCS5D02G467200/TraesCS7D02G176700/TraesCS6B02G468200/TraesCS5B02G155400/TraesCS6B02G236600/TraesCS6B02G343900/TraesCS5B02G155600/TraesCS7B02G271600	11	BP
GO:0006206	pyrimidine nucleobase metabolic process	3/3745	76/107890	0.493939	0.859651	0.806762	TraesCS7A02G259200/TraesCS5B02G154400/TraesCS4D02G145000	3	BP
GO:0009130	pyrimidine nucleoside monophosphate biosynthetic process	3/3745	76/107890	0.493939	0.859651	0.806762	TraesCS7A02G259200/TraesCS6D02G254500/TraesCS3A02G206600	3	BP
GO:0071731	response to nitric oxide	3/3745	76/107890	0.493939	0.859651	0.806762	TraesCS6D02G185000/TraesCS6D02G225000/TraesCS6B02G228900	3	BP
GO:0009086	methionine biosynthetic process	16/3745	450/107890	0.496397	0.860374	0.80744	TraesCS7A02G211600/TraesCS6D02G294600/TraesCS6D02G252400/TraesCS6D02G378300/TraesCS6D02G181800/TraesCS6D02G203100/TraesCS7A02G209600/TraesCS6D02G338500/TraesCS6D02G216000/TraesCS5B02G159100/TraesCS6B02G235400/TraesCS6B02G404900/TraesCS5B02G158800/TraesCS6B02G345800/TraesCS6B02G432800/TraesCS6B02G467000	16	BP
GO:0005978	glycogen biosynthetic process	4/3745	105/107890	0.496706	0.860374	0.80744	TraesCS6D02G287000/TraesCS1B02G277500/TraesCS6B02G336400/TraesCS6B02G257400	4	BP
GO:0048534	hematopoietic or lymphoid organ development	9/3745	249/107890	0.498128	0.860374	0.80744	TraesCS6D02G315400/TraesCS4B02G071600/TraesCS2D02G480300/TraesCS4D02G145700/TraesCS4B02G304600/TraesCS3D02G166200/TraesCS6B02G350800/TraesCS6B02G366400/TraesCS6B02G387300	9	BP
GO:0048870	cell motility	10/3745	278/107890	0.499139	0.860374	0.80744	TraesCS6D02G270300/TraesCS6D02G198100/TraesCS6D02G242400/TraesCS1D02G406300/TraesCS7A02G262700/TraesCS6B02G335200/TraesCS7B02G260700/TraesCS3D02G166900/TraesCS5D02G479300/TraesCS2D02G533700	10	BP
GO:0000747	conjugation with cellular fusion	2/3745	48/107890	0.499917	0.860374	0.80744	TraesCS4A02G158000/TraesCS4A02G066100	2	BP
GO:0040014	regulation of multicellular organism growth	2/3745	48/107890	0.499917	0.860374	0.80744	TraesCS3D02G163900/TraesCS7B02G114200	2	BP
GO:0052325	cell wall pectin biosynthetic process	2/3745	48/107890	0.499917	0.860374	0.80744	TraesCS1B02G253400/TraesCS6B02G348700	2	BP
GO:0006040	amino sugar metabolic process	11/3745	307/107890	0.500042	0.860374	0.80744	TraesCS6D02G190500/TraesCS6D02G199500/TraesCS3D02G366500/TraesCS6B02G470000/TraesCS4D02G126400/TraesCS7D02G454000/TraesCS4D02G142000/TraesCS7D02G453900/TraesCS7A02G466300/TraesCS3A02G312500/TraesCS2A02G350900	11	BP
GO:0009583	detection of light stimulus	8/3745	221/107890	0.502091	0.860374	0.80744	TraesCS6D02G187200/TraesCS6D02G211700/TraesCS6D02G305800/TraesCS1B02G244300/TraesCS6B02G356400/TraesCS6B02G224100/TraesCS3A02G210100/TraesCS4D02G121300	8	BP
GO:0009129	pyrimidine nucleoside monophosphate metabolic process	3/3745	77/107890	0.50267	0.860374	0.80744	TraesCS7A02G259200/TraesCS6D02G254500/TraesCS3A02G206600	3	BP
GO:0048829	root cap development	3/3745	77/107890	0.50267	0.860374	0.80744	TraesCS6D02G212700/TraesCS7A02G068000/TraesCS7D02G062100	3	BP
GO:0051351	positive regulation of ligase activity	3/3745	77/107890	0.50267	0.860374	0.80744	TraesCS6D02G195300/TraesCS6D02G233200/TraesCS6D02G327000	3	BP
GO:0044275	cellular carbohydrate catabolic process	17/3745	481/107890	0.504115	0.860374	0.80744	TraesCS6D02G331100/TraesCS3A02G366300/TraesCS5D02G080200/TraesCS7A02G226000/TraesCS6D02G311400/TraesCS4B02G104500/TraesCS7D02G201000/TraesCS3D02G167100/TraesCS6B02G331600/TraesCS4B02G173200/TraesCS6B02G342600/TraesCS6A02G122100/TraesCS6A02G312400/TraesCS7A02G197900/TraesCS7B02G104600/TraesCS6B02G362900/TraesCS6B02G150300	17	BP
GO:0001934	positive regulation of protein phosphorylation	15/3745	424/107890	0.50663	0.860374	0.80744	TraesCS6D02G332100/TraesCS6D02G328800/TraesCS5B02G154600/TraesCS4B02G116000/TraesCS6B02G362300/TraesCS6B02G226200/TraesCS4B02G115800/TraesCS6B02G382700/TraesCS6B02G352700/TraesCS6B02G379500/TraesCS5D02G184300/TraesCS6B02G358800/TraesCS5A02G179700/TraesCS1B02G375400/TraesCS5B02G177500	15	BP
GO:0001704	formation of primary germ layer	1/3745	20/107890	0.506693	0.860374	0.80744	TraesCS6B02G350800	1	BP
GO:0002700	regulation of production of molecular mediator of immune response	1/3745	20/107890	0.506693	0.860374	0.80744	TraesCS7A02G262400	1	BP
GO:0006011	UDP-glucose metabolic process	1/3745	20/107890	0.506693	0.860374	0.80744	TraesCS7A02G419300	1	BP
GO:0007035	vacuolar acidification	1/3745	20/107890	0.506693	0.860374	0.80744	TraesCS3A02G210400	1	BP
GO:0007097	nuclear migration	1/3745	20/107890	0.506693	0.860374	0.80744	TraesCS6D02G253600	1	BP
GO:0007528	neuromuscular junction development	1/3745	20/107890	0.506693	0.860374	0.80744	TraesCS4D02G126400	1	BP
GO:0010430	fatty acid omega-oxidation	1/3745	20/107890	0.506693	0.860374	0.80744	TraesCS6D02G238700	1	BP
GO:0019695	choline metabolic process	1/3745	20/107890	0.506693	0.860374	0.80744	TraesCS6B02G408100	1	BP
GO:0031118	rRNA pseudouridine synthesis	1/3745	20/107890	0.506693	0.860374	0.80744	TraesCS6D02G269300	1	BP
GO:0033345	asparagine catabolic process via L-aspartate	1/3745	20/107890	0.506693	0.860374	0.80744	TraesCS2D02G512000	1	BP
GO:0035024	negative regulation of Rho protein signal transduction	1/3745	20/107890	0.506693	0.860374	0.80744	TraesCS6B02G335200	1	BP
GO:0042780	tRNA 3'-end processing	1/3745	20/107890	0.506693	0.860374	0.80744	TraesCS3D02G163900	1	BP
GO:0043112	receptor metabolic process	1/3745	20/107890	0.506693	0.860374	0.80744	TraesCS6B02G417700	1	BP
GO:0043271	negative regulation of ion transport	1/3745	20/107890	0.506693	0.860374	0.80744	TraesCS5B02G155200	1	BP
GO:0045022	early endosome to late endosome transport	1/3745	20/107890	0.506693	0.860374	0.80744	TraesCS6B02G396200	1	BP
GO:0048530	fruit morphogenesis	1/3745	20/107890	0.506693	0.860374	0.80744	TraesCS3A02G140700	1	BP
GO:0051647	nucleus localization	1/3745	20/107890	0.506693	0.860374	0.80744	TraesCS6D02G253600	1	BP
GO:0071324	cellular response to disaccharide stimulus	1/3745	20/107890	0.506693	0.860374	0.80744	TraesCS6B02G342700	1	BP
GO:0097501	stress response to metal ion	1/3745	20/107890	0.506693	0.860374	0.80744	TraesCS2B02G429200	1	BP
GO:0098927	vesicle-mediated transport between endosomal compartments	1/3745	20/107890	0.506693	0.860374	0.80744	TraesCS6B02G396200	1	BP
GO:1901002	positive regulation of response to salt stress	1/3745	20/107890	0.506693	0.860374	0.80744	TraesCS6D02G203800	1	BP
GO:1902074	response to salt	1/3745	20/107890	0.506693	0.860374	0.80744	TraesCS4B02G095400	1	BP
GO:0010389	regulation of G2/M transition of mitotic cell cycle	10/3745	280/107890	0.508225	0.860374	0.80744	TraesCS7A02G248700/TraesCS6D02G214400/TraesCS6B02G344300/TraesCS5B02G156900/TraesCS6B02G341400/TraesCS6B02G356900/TraesCS7B02G216700/TraesCS7D02G312700/TraesCS6B02G393100/TraesCS6B02G462700	10	BP
GO:0015840	urea transport	2/3745	49/107890	0.510911	0.860374	0.80744	TraesCS4B02G349500/TraesCS3D02G163400	2	BP
GO:0015937	coenzyme A biosynthetic process	2/3745	49/107890	0.510911	0.860374	0.80744	TraesCS6D02G219600/TraesCS7A02G256900	2	BP
GO:0031112	positive regulation of microtubule polymerization or depolymerization	2/3745	49/107890	0.510911	0.860374	0.80744	TraesCS1B02G267200/TraesCS3D02G164500	2	BP
GO:0070475	rRNA base methylation	2/3745	49/107890	0.510911	0.860374	0.80744	TraesCS5B02G254900/TraesCS5A02G255200	2	BP
GO:0071918	urea transmembrane transport	2/3745	49/107890	0.510911	0.860374	0.80744	TraesCS4B02G349500/TraesCS3D02G163400	2	BP
GO:0001172	transcription, RNA-templated	3/3745	78/107890	0.511323	0.860374	0.80744	TraesCS6D02G344300/TraesCS5B02G526900/TraesCS5B02G526700	3	BP
GO:0015740	C4-dicarboxylate transport	3/3745	78/107890	0.511323	0.860374	0.80744	TraesCS7A02G208700/TraesCS7A02G220200/TraesCS7A02G244400	3	BP
GO:0071417	cellular response to organonitrogen compound	3/3745	78/107890	0.511323	0.860374	0.80744	TraesCS5B02G155400/TraesCS5B02G155600/TraesCS7B02G271600	3	BP
GO:0009306	protein secretion	4/3745	107/107890	0.511486	0.860374	0.80744	TraesCS1B02G259300/TraesCS6B02G344100/TraesCS5B02G157500/TraesCS6B02G396200	4	BP
GO:0035592	establishment of protein localization to extracellular region	4/3745	107/107890	0.511486	0.860374	0.80744	TraesCS1B02G259300/TraesCS6B02G344100/TraesCS5B02G157500/TraesCS6B02G396200	4	BP
GO:0071692	protein localization to extracellular region	4/3745	107/107890	0.511486	0.860374	0.80744	TraesCS1B02G259300/TraesCS6B02G344100/TraesCS5B02G157500/TraesCS6B02G396200	4	BP
GO:0009765	photosynthesis, light harvesting	6/3745	165/107890	0.511838	0.860374	0.80744	TraesCS6D02G250200/TraesCS1B02G261800/TraesCS6B02G337900/TraesCS1A02G403800/TraesCS6B02G350500/TraesCS1A02G306600	6	BP
GO:0033866	nucleoside bisphosphate biosynthetic process	6/3745	165/107890	0.511838	0.860374	0.80744	TraesCS6D02G219600/TraesCS7B02G283000/TraesCS7A02G256900/TraesCS6B02G431000/TraesCS6B02G342000/TraesCS7D02G084700	6	BP
GO:0034030	ribonucleoside bisphosphate biosynthetic process	6/3745	165/107890	0.511838	0.860374	0.80744	TraesCS6D02G219600/TraesCS7B02G283000/TraesCS7A02G256900/TraesCS6B02G431000/TraesCS6B02G342000/TraesCS7D02G084700	6	BP
GO:0034033	purine nucleoside bisphosphate biosynthetic process	6/3745	165/107890	0.511838	0.860374	0.80744	TraesCS6D02G219600/TraesCS7B02G283000/TraesCS7A02G256900/TraesCS6B02G431000/TraesCS6B02G342000/TraesCS7D02G084700	6	BP
GO:0060627	regulation of vesicle-mediated transport	7/3745	194/107890	0.512048	0.860374	0.80744	TraesCS7A02G270600/TraesCS6D02G270300/TraesCS6D02G242400/TraesCS6B02G338000/TraesCS6B02G452200/TraesCS6B02G230400/TraesCS6B02G415900	7	BP
GO:0010050	vegetative phase change	9/3745	252/107890	0.512508	0.860374	0.80744	TraesCS7A02G265300/TraesCS6D02G181800/TraesCS7A02G265200/TraesCS6D02G293100/TraesCS6B02G235400/TraesCS5B02G157800/TraesCS3D02G162700/TraesCS6B02G343800/TraesCS6B02G466700	9	BP
GO:1902749	regulation of cell cycle G2/M phase transition	10/3745	281/107890	0.51275	0.860374	0.80744	TraesCS7A02G248700/TraesCS6D02G214400/TraesCS6B02G344300/TraesCS5B02G156900/TraesCS6B02G341400/TraesCS6B02G356900/TraesCS7B02G216700/TraesCS7D02G312700/TraesCS6B02G393100/TraesCS6B02G462700	10	BP
GO:0000077	DNA damage checkpoint	7/3745	195/107890	0.517478	0.860374	0.80744	TraesCS6D02G195300/TraesCS6D02G305800/TraesCS7A02G214200/TraesCS2D02G480300/TraesCS6B02G334400/TraesCS6B02G356400/TraesCS7B02G115400	7	BP
GO:0006265	DNA topological change	6/3745	166/107890	0.517726	0.860374	0.80744	TraesCS6D02G246300/TraesCS6D02G356900/TraesCS2B02G541100/TraesCS1B02G271100/TraesCS2A02G513200/TraesCS7B02G115000	6	BP
GO:0008406	gonad development	5/3745	137/107890	0.518135	0.860374	0.80744	TraesCS6D02G190000/TraesCS6B02G421000/TraesCS4D02G128200/TraesCS6B02G225700/TraesCS2B02G594400	5	BP
GO:0051261	protein depolymerization	5/3745	137/107890	0.518135	0.860374	0.80744	TraesCS6B02G447400/TraesCS6A02G403500/TraesCS6B02G338000/TraesCS3D02G164500/TraesCS6B02G265700	5	BP
GO:2000028	regulation of photoperiodism, flowering	5/3745	137/107890	0.518135	0.860374	0.80744	TraesCS7A02G218600/TraesCS6B02G113100/TraesCS7A02G263500/TraesCS6D02G267100/TraesCS7B02G009900	5	BP
GO:0007163	establishment or maintenance of cell polarity	4/3745	108/107890	0.5188	0.860374	0.80744	TraesCS3B02G013300/TraesCS1D02G163000/TraesCS3A02G010000/TraesCS4D02G305100	4	BP
GO:0030150	protein import into mitochondrial matrix	3/3745	79/107890	0.519895	0.860374	0.80744	TraesCS7A02G282000/TraesCS6D02G380400/TraesCS6B02G435000	3	BP
GO:0097366	response to bronchodilator	3/3745	79/107890	0.519895	0.860374	0.80744	TraesCS6D02G185000/TraesCS6D02G225000/TraesCS6B02G228900	3	BP
GO:0009060	aerobic respiration	13/3745	370/107890	0.52137	0.860374	0.80744	TraesCS6D02G183200/TraesCS6D02G192900/TraesCS7A02G263400/TraesCS7A02G239000/TraesCS7A02G219100/TraesCS5B02G322200/TraesCS2B02G244600/TraesCS3A02G405000/TraesCS6B02G440200/TraesCS6B02G235000/TraesCS6B02G238500/TraesCS4B02G173000/TraesCS7B02G175500	13	BP
GO:0048598	embryonic morphogenesis	13/3745	370/107890	0.52137	0.860374	0.80744	TraesCS7A02G286200/TraesCS7A02G227400/TraesCS6D02G239600/TraesCS1D02G406300/TraesCS6D02G229100/TraesCS6D02G254100/TraesCS1B02G244500/TraesCS4B02G288000/TraesCS6B02G337300/TraesCS6B02G350800/TraesCS4D02G126400/TraesCS6B02G342700/TraesCS4B02G348300	13	BP
GO:0002832	negative regulation of response to biotic stimulus	2/3745	50/107890	0.521745	0.860374	0.80744	TraesCS6D02G196000/TraesCS5B02G153300	2	BP
GO:0009714	chalcone metabolic process	2/3745	50/107890	0.521745	0.860374	0.80744	TraesCS7A02G093900/TraesCS2B02G558400	2	BP
GO:0009715	chalcone biosynthetic process	2/3745	50/107890	0.521745	0.860374	0.80744	TraesCS7A02G093900/TraesCS2B02G558400	2	BP
GO:0010082	regulation of root meristem growth	2/3745	50/107890	0.521745	0.860374	0.80744	TraesCS1B02G274600/TraesCS7B02G175400	2	BP
GO:0048737	imaginal disc-derived appendage development	2/3745	50/107890	0.521745	0.860374	0.80744	TraesCS2D02G480300/TraesCS6B02G335200	2	BP
GO:0060041	retina development in camera-type eye	2/3745	50/107890	0.521745	0.860374	0.80744	TraesCS6D02G302200/TraesCS6B02G353100	2	BP
GO:0006662	glycerol ether metabolic process	6/3745	167/107890	0.523587	0.860374	0.80744	TraesCS6D02G259000/TraesCS6D02G379700/TraesCS6A02G323100/TraesCS6B02G409800/TraesCS6B02G434200/TraesCS4B02G174100	6	BP
GO:0046351	disaccharide biosynthetic process	6/3745	167/107890	0.523587	0.860374	0.80744	TraesCS7A02G209600/TraesCS6D02G334000/TraesCS6B02G235400/TraesCS6B02G384500/TraesCS1B02G224300/TraesCS6B02G330900	6	BP
GO:0006842	tricarboxylic acid transport	1/3745	21/107890	0.52382	0.860374	0.80744	TraesCS7A02G244400	1	BP
GO:0009051	pentose-phosphate shunt, oxidative branch	1/3745	21/107890	0.52382	0.860374	0.80744	TraesCS6D02G195700	1	BP
GO:0010148	transpiration	1/3745	21/107890	0.52382	0.860374	0.80744	TraesCS6B02G366900	1	BP
GO:0010158	abaxial cell fate specification	1/3745	21/107890	0.52382	0.860374	0.80744	TraesCS6D02G220400	1	BP
GO:0010950	positive regulation of endopeptidase activity	1/3745	21/107890	0.52382	0.860374	0.80744	TraesCS6B02G335200	1	BP
GO:0014003	oligodendrocyte development	1/3745	21/107890	0.52382	0.860374	0.80744	TraesCS6B02G421000	1	BP
GO:0016094	polyprenol biosynthetic process	1/3745	21/107890	0.52382	0.860374	0.80744	TraesCS6B02G352400	1	BP
GO:0019228	neuronal action potential	1/3745	21/107890	0.52382	0.860374	0.80744	TraesCS6B02G421000	1	BP
GO:0036092	phosphatidylinositol-3-phosphate biosynthetic process	1/3745	21/107890	0.52382	0.860374	0.80744	TraesCS6B02G374700	1	BP
GO:0040013	negative regulation of locomotion	1/3745	21/107890	0.52382	0.860374	0.80744	TraesCS7A02G262700	1	BP
GO:0044205	'de novo' UMP biosynthetic process	1/3745	21/107890	0.52382	0.860374	0.80744	TraesCS3A02G206600	1	BP
GO:0045736	negative regulation of cyclin-dependent protein serine/threonine kinase activity	1/3745	21/107890	0.52382	0.860374	0.80744	TraesCS6B02G345300	1	BP
GO:0048311	mitochondrion distribution	1/3745	21/107890	0.52382	0.860374	0.80744	TraesCS6B02G387400	1	BP
GO:0048709	oligodendrocyte differentiation	1/3745	21/107890	0.52382	0.860374	0.80744	TraesCS6B02G421000	1	BP
GO:0061041	regulation of wound healing	1/3745	21/107890	0.52382	0.860374	0.80744	TraesCS6A02G037600	1	BP
GO:1903034	regulation of response to wounding	1/3745	21/107890	0.52382	0.860374	0.80744	TraesCS6A02G037600	1	BP
GO:1904030	negative regulation of cyclin-dependent protein kinase activity	1/3745	21/107890	0.52382	0.860374	0.80744	TraesCS6B02G345300	1	BP
GO:0009773	photosynthetic electron transport in photosystem I	5/3745	138/107890	0.524585	0.86083	0.807868	TraesCS7A02G282100/TraesCS6D02G271900/TraesCS6D02G287300/TraesCS1B02G261800/TraesCS6B02G336800	5	BP
GO:0006555	methionine metabolic process	17/3745	487/107890	0.524775	0.86083	0.807868	TraesCS7A02G211600/TraesCS6D02G294600/TraesCS6D02G252400/TraesCS6D02G378300/TraesCS6D02G181800/TraesCS6D02G203100/TraesCS7A02G209600/TraesCS6D02G338500/TraesCS6D02G216000/TraesCS5B02G159100/TraesCS6B02G235400/TraesCS6B02G404900/TraesCS5B02G158800/TraesCS6B02G345800/TraesCS6B02G432800/TraesCS6B02G467000/TraesCS2A02G396400	17	BP
GO:0014706	striated muscle tissue development	4/3745	109/107890	0.526063	0.86083	0.807868	TraesCS7A02G419900/TraesCS4D02G126400/TraesCS5D02G441800/TraesCS5B02G436800	4	BP
GO:0061136	regulation of proteasomal protein catabolic process	4/3745	109/107890	0.526063	0.86083	0.807868	TraesCS6D02G187100/TraesCS5B02G153700/TraesCS6B02G341600/TraesCS4B02G208900	4	BP
GO:1903050	regulation of proteolysis involved in cellular protein catabolic process	4/3745	109/107890	0.526063	0.86083	0.807868	TraesCS6D02G187100/TraesCS5B02G153700/TraesCS6B02G341600/TraesCS4B02G208900	4	BP
GO:1903362	regulation of cellular protein catabolic process	4/3745	109/107890	0.526063	0.86083	0.807868	TraesCS6D02G187100/TraesCS5B02G153700/TraesCS6B02G341600/TraesCS4B02G208900	4	BP
GO:0009269	response to desiccation	9/3745	255/107890	0.526757	0.86143	0.808432	TraesCS6D02G252900/TraesCS7A02G278900/TraesCS4D02G329400/TraesCS1B02G273000/TraesCS1B02G273100/TraesCS6B02G365200/TraesCS3D02G162700/TraesCS1A02G317900/TraesCS5B02G381800	9	BP
GO:0009608	response to symbiont	7/3745	197/107890	0.528272	0.863017	0.809921	TraesCS6D02G254000/TraesCS6D02G020700/TraesCS1B02G441400/TraesCS6B02G334300/TraesCS3A02G209200/TraesCS6B02G356800/TraesCS6A02G326200	7	BP
GO:0006901	vesicle coating	3/3745	80/107890	0.528385	0.863017	0.809921	TraesCS1B02G252100/TraesCS6B02G335200/TraesCS6B02G407500	3	BP
GO:0007548	sex differentiation	6/3745	168/107890	0.529418	0.864168	0.811002	TraesCS6D02G190000/TraesCS2D02G480300/TraesCS6B02G421000/TraesCS4D02G128200/TraesCS6B02G225700/TraesCS2B02G594400	6	BP
GO:0030004	cellular monovalent inorganic cation homeostasis	5/3745	139/107890	0.530997	0.866207	0.812915	TraesCS7A02G244400/TraesCS6D02G203800/TraesCS7A02G242300/TraesCS3A02G210400/TraesCS4D02G147600	5	BP
GO:0019646	aerobic electron transport chain	2/3745	51/107890	0.532417	0.866909	0.813574	TraesCS7A02G239000/TraesCS3A02G405000	2	BP
GO:0043620	regulation of DNA-templated transcription in response to stress	2/3745	51/107890	0.532417	0.866909	0.813574	TraesCS6D02G254700/TraesCS6B02G398500	2	BP
GO:0140253	cell-cell fusion	2/3745	51/107890	0.532417	0.866909	0.813574	TraesCS4A02G158000/TraesCS4A02G066100	2	BP
GO:0030048	actin filament-based movement	9/3745	257/107890	0.536176	0.872489	0.81881	TraesCS6D02G263000/TraesCS6D02G350800/TraesCS5D02G092500/TraesCS6B02G226700/TraesCS6B02G041100/TraesCS6B02G403400/TraesCS3A02G205700/TraesCS5A02G386500/TraesCS5A02G382800	9	BP
GO:0006530	asparagine catabolic process	1/3745	22/107890	0.540352	0.873873	0.82011	TraesCS2D02G512000	1	BP
GO:0006646	phosphatidylethanolamine biosynthetic process	1/3745	22/107890	0.540352	0.873873	0.82011	TraesCS4D02G121900	1	BP
GO:0017157	regulation of exocytosis	1/3745	22/107890	0.540352	0.873873	0.82011	TraesCS6B02G338000	1	BP
GO:0034067	protein localization to Golgi apparatus	1/3745	22/107890	0.540352	0.873873	0.82011	TraesCS6B02G224600	1	BP
GO:0040018	positive regulation of multicellular organism growth	1/3745	22/107890	0.540352	0.873873	0.82011	TraesCS7B02G114200	1	BP
GO:0042552	myelination	1/3745	22/107890	0.540352	0.873873	0.82011	TraesCS6B02G421000	1	BP
GO:0046135	pyrimidine nucleoside catabolic process	1/3745	22/107890	0.540352	0.873873	0.82011	TraesCS7B02G176500	1	BP
GO:0046337	phosphatidylethanolamine metabolic process	1/3745	22/107890	0.540352	0.873873	0.82011	TraesCS4D02G121900	1	BP
GO:0048564	photosystem I assembly	1/3745	22/107890	0.540352	0.873873	0.82011	TraesCS6D02G244900	1	BP
GO:0090257	regulation of muscle system process	1/3745	22/107890	0.540352	0.873873	0.82011	TraesCS6B02G344100	1	BP
GO:0010052	guard cell differentiation	2/3745	52/107890	0.542924	0.876416	0.822495	TraesCS6B02G226700/TraesCS6B02G347500	2	BP
GO:0051443	positive regulation of ubiquitin-protein transferase activity	2/3745	52/107890	0.542924	0.876416	0.822495	TraesCS6D02G354500/TraesCS6B02G402400	2	BP
GO:0051781	positive regulation of cell division	2/3745	52/107890	0.542924	0.876416	0.822495	TraesCS6D02G216400/TraesCS1B02G275600	2	BP
GO:0009647	skotomorphogenesis	3/3745	82/107890	0.545108	0.878861	0.824791	TraesCS6D02G305800/TraesCS6B02G356400/TraesCS4D02G235200	3	BP
GO:0051051	negative regulation of transport	3/3745	82/107890	0.545108	0.878861	0.824791	TraesCS6D02G241800/TraesCS1B02G252700/TraesCS5B02G155200	3	BP
GO:0006887	exocytosis	15/3745	436/107890	0.55029	0.883373	0.829025	TraesCS7A02G247000/TraesCS7A02G208500/TraesCS7D02G416800/TraesCS6D02G254300/TraesCS2D02G147900/TraesCS7A02G424800/TraesCS6B02G333500/TraesCS6B02G338000/TraesCS4D02G112900/TraesCS6B02G387300/TraesCS3A02G205700/TraesCS3D02G165300/TraesCS6B02G432000/TraesCS4B02G115200/TraesCS4D02G305100	15	BP
GO:0009895	negative regulation of catabolic process	2/3745	53/107890	0.553265	0.883373	0.829025	TraesCS6D02G187100/TraesCS7B02G114200	2	BP
GO:0019217	regulation of fatty acid metabolic process	2/3745	53/107890	0.553265	0.883373	0.829025	TraesCS6D02G358000/TraesCS6B02G411500	2	BP
GO:0019933	cAMP-mediated signaling	2/3745	53/107890	0.553265	0.883373	0.829025	TraesCS4B02G173700/TraesCS6B02G229000	2	BP
GO:0030098	lymphocyte differentiation	2/3745	53/107890	0.553265	0.883373	0.829025	TraesCS4B02G071600/TraesCS2D02G480300	2	BP
GO:0098609	cell-cell adhesion	2/3745	53/107890	0.553265	0.883373	0.829025	TraesCS7A02G227400/TraesCS6B02G413200	2	BP
GO:0006553	lysine metabolic process	3/3745	83/107890	0.553339	0.883373	0.829025	TraesCS6D02G325100/TraesCS6B02G376200/TraesCS4D02G125600	3	BP
GO:0046185	aldehyde catabolic process	12/3745	349/107890	0.55384	0.883373	0.829025	TraesCS6D02G221800/TraesCS6D02G216200/TraesCS6D02G393200/TraesCS7A02G252400/TraesCS7A02G261700/TraesCS1B02G273600/TraesCS5B02G464300/TraesCS6B02G423900/TraesCS6B02G425700/TraesCS1D02G132700/TraesCS5D02G550100/TraesCS6B02G455600	12	BP
GO:0006085	acetyl-CoA biosynthetic process	4/3745	113/107890	0.554562	0.883373	0.829025	TraesCS7B02G283000/TraesCS6B02G431000/TraesCS6B02G342000/TraesCS7D02G084700	4	BP
GO:0002520	immune system development	9/3745	261/107890	0.5548	0.883373	0.829025	TraesCS6D02G315400/TraesCS4B02G071600/TraesCS2D02G480300/TraesCS4D02G145700/TraesCS4B02G304600/TraesCS3D02G166200/TraesCS6B02G350800/TraesCS6B02G366400/TraesCS6B02G387300	9	BP
GO:0071482	cellular response to light stimulus	17/3745	496/107890	0.555305	0.883373	0.829025	TraesCS6D02G187200/TraesCS6D02G211700/TraesCS6D02G202000/TraesCS7A02G282100/TraesCS6D02G305800/TraesCS4B02G108400/TraesCS1B02G244300/TraesCS1B02G257400/TraesCS5B02G155200/TraesCS6B02G331000/TraesCS6B02G356400/TraesCS6B02G224100/TraesCS6B02G227500/TraesCS6B02G237800/TraesCS3A02G210100/TraesCS6B02G418600/TraesCS4D02G121300	17	BP
GO:0006048	UDP-N-acetylglucosamine biosynthetic process	1/3745	23/107890	0.55631	0.883373	0.829025	TraesCS4D02G126400	1	BP
GO:0010188	response to microbial phytotoxin	1/3745	23/107890	0.55631	0.883373	0.829025	TraesCS3D02G165700	1	BP
GO:0010452	histone H3-K36 methylation	1/3745	23/107890	0.55631	0.883373	0.829025	TraesCS4D02G145700	1	BP
GO:0010721	negative regulation of cell development	1/3745	23/107890	0.55631	0.883373	0.829025	TraesCS7A02G228200	1	BP
GO:0015012	heparan sulfate proteoglycan biosynthetic process	1/3745	23/107890	0.55631	0.883373	0.829025	TraesCS3A02G207900	1	BP
GO:0019478	D-amino acid catabolic process	1/3745	23/107890	0.55631	0.883373	0.829025	TraesCS6B02G354300	1	BP
GO:0021782	glial cell development	1/3745	23/107890	0.55631	0.883373	0.829025	TraesCS6B02G421000	1	BP
GO:0031638	zymogen activation	1/3745	23/107890	0.55631	0.883373	0.829025	TraesCS6B02G335200	1	BP
GO:0032261	purine nucleotide salvage	1/3745	23/107890	0.55631	0.883373	0.829025	TraesCS1B02G238200	1	BP
GO:0035308	negative regulation of protein dephosphorylation	1/3745	23/107890	0.55631	0.883373	0.829025	TraesCS7B02G278100	1	BP
GO:0043954	cellular component maintenance	1/3745	23/107890	0.55631	0.883373	0.829025	TraesCS4B02G358500	1	BP
GO:0043984	histone H4-K16 acetylation	1/3745	23/107890	0.55631	0.883373	0.829025	TraesCS6D02G232000	1	BP
GO:0080144	amino acid homeostasis	1/3745	23/107890	0.55631	0.883373	0.829025	TraesCS6B02G360900	1	BP
GO:0090344	negative regulation of cell aging	1/3745	23/107890	0.55631	0.883373	0.829025	TraesCS4A02G409200	1	BP
GO:1901800	positive regulation of proteasomal protein catabolic process	3/3745	84/107890	0.56148	0.889081	0.834381	TraesCS5B02G153700/TraesCS6B02G341600/TraesCS4B02G208900	3	BP
GO:1903052	positive regulation of proteolysis involved in cellular protein catabolic process	3/3745	84/107890	0.56148	0.889081	0.834381	TraesCS5B02G153700/TraesCS6B02G341600/TraesCS4B02G208900	3	BP
GO:1903364	positive regulation of cellular protein catabolic process	3/3745	84/107890	0.56148	0.889081	0.834381	TraesCS5B02G153700/TraesCS6B02G341600/TraesCS4B02G208900	3	BP
GO:0006909	phagocytosis	4/3745	114/107890	0.561542	0.889081	0.834381	TraesCS3A02G211000/TraesCS6B02G452200/TraesCS6B02G432000/TraesCS6B02G396200	4	BP
GO:0051674	localization of cell	10/3745	292/107890	0.561596	0.889081	0.834381	TraesCS6D02G270300/TraesCS6D02G198100/TraesCS6D02G242400/TraesCS1D02G406300/TraesCS7A02G262700/TraesCS6B02G335200/TraesCS7B02G260700/TraesCS3D02G166900/TraesCS5D02G479300/TraesCS2D02G533700	10	BP
GO:0043928	exonucleolytic catabolism of deadenylated mRNA	2/3745	54/107890	0.56344	0.891463	0.836617	TraesCS1B02G254400/TraesCS2A02G528800	2	BP
GO:0019751	polyol metabolic process	17/3745	499/107890	0.565336	0.893261	0.838304	TraesCS6D02G199200/TraesCS6D02G259000/TraesCS6D02G287000/TraesCS6D02G379900/TraesCS6B02G246500/TraesCS6A02G216400/TraesCS7A02G263000/TraesCS7B02G093800/TraesCS2D02G218400/TraesCS1B02G274000/TraesCS1B02G278600/TraesCS6B02G374700/TraesCS6B02G226700/TraesCS6B02G336400/TraesCS6B02G434400/TraesCS6B02G350700/TraesCS6B02G348200	17	BP
GO:0006896	Golgi to vacuole transport	4/3745	115/107890	0.568462	0.893261	0.838304	TraesCS6B02G342500/TraesCS7A02G483700/TraesCS7D02G471300/TraesCS7B02G387100	4	BP
GO:0048508	embryonic meristem development	9/3745	264/107890	0.568567	0.893261	0.838304	TraesCS6D02G359000/TraesCS6D02G186900/TraesCS1B02G238200/TraesCS6B02G223700/TraesCS6B02G356900/TraesCS6B02G412000/TraesCS6B02G425900/TraesCS6B02G466700/TraesCS3A02G210100	9	BP
GO:0006760	folic acid-containing compound metabolic process	5/3745	145/107890	0.568607	0.893261	0.838304	TraesCS6D02G181700/TraesCS7A02G276800/TraesCS7A02G276900/TraesCS6B02G230200/TraesCS3D02G167700	5	BP
GO:0055081	anion homeostasis	5/3745	145/107890	0.568607	0.893261	0.838304	TraesCS6D02G203800/TraesCS7A02G263000/TraesCS1B02G415800/TraesCS6B02G360900/TraesCS2B02G430000	5	BP
GO:0001578	microtubule bundle formation	3/3745	85/107890	0.56953	0.893261	0.838304	TraesCS1B02G267200/TraesCS3B02G013300/TraesCS3A02G010000	3	BP
GO:0009396	folic acid-containing compound biosynthetic process	3/3745	85/107890	0.56953	0.893261	0.838304	TraesCS7A02G276800/TraesCS7A02G276900/TraesCS3D02G167700	3	BP
GO:0090502	RNA phosphodiester bond hydrolysis, endonucleolytic	16/3745	471/107890	0.570065	0.893261	0.838304	TraesCS7A02G286200/TraesCS6D02G188100/TraesCS7A02G261300/TraesCS6D02G384500/TraesCS6D02G272800/TraesCS6D02G320200/TraesCS6B02G010000/TraesCS4D02G167600/TraesCS4B02G140700/TraesCS6B02G231600/TraesCS6B02G440500/TraesCS3D02G163900/TraesCS3A02G209700/TraesCS6B02G344700/TraesCS4D02G141600/TraesCS4B02G118400	16	BP
GO:0009612	response to mechanical stimulus	10/3745	294/107890	0.570266	0.893261	0.838304	TraesCS6D02G181200/TraesCS4D02G077900/TraesCS6D02G318000/TraesCS7D02G419900/TraesCS7A02G427600/TraesCS7B02G327700/TraesCS5D02G392200/TraesCS3A02G537700/TraesCS5A02G382800/TraesCS2A02G396400	10	BP
GO:0019048	modulation by virus of host process	7/3745	205/107890	0.570445	0.893261	0.838304	TraesCS6D02G219400/TraesCS6D02G091700/TraesCS2A02G467700/TraesCS4B02G081100/TraesCS3D02G164500/TraesCS6B02G412000/TraesCS6B02G466700	7	BP
GO:0000737	DNA catabolic process, endonucleolytic	1/3745	24/107890	0.571714	0.893261	0.838304	TraesCS6B02G286500	1	BP
GO:0002696	positive regulation of leukocyte activation	1/3745	24/107890	0.571714	0.893261	0.838304	TraesCS6D02G242400	1	BP
GO:0006107	oxaloacetate metabolic process	1/3745	24/107890	0.571714	0.893261	0.838304	TraesCS6D02G183200	1	BP
GO:0019464	glycine decarboxylation via glycine cleavage system	1/3745	24/107890	0.571714	0.893261	0.838304	TraesCS6B02G342400	1	BP
GO:0033591	response to L-ascorbic acid	1/3745	24/107890	0.571714	0.893261	0.838304	TraesCS6D02G294800	1	BP
GO:0042547	cell wall modification involved in multidimensional cell growth	1/3745	24/107890	0.571714	0.893261	0.838304	TraesCS3D02G164400	1	BP
GO:0045216	cell-cell junction organization	1/3745	24/107890	0.571714	0.893261	0.838304	TraesCS6D02G216300	1	BP
GO:0045851	pH reduction	1/3745	24/107890	0.571714	0.893261	0.838304	TraesCS3A02G210400	1	BP
GO:0046580	negative regulation of Ras protein signal transduction	1/3745	24/107890	0.571714	0.893261	0.838304	TraesCS6B02G335200	1	BP
GO:0051058	negative regulation of small GTPase mediated signal transduction	1/3745	24/107890	0.571714	0.893261	0.838304	TraesCS6B02G335200	1	BP
GO:0051452	intracellular pH reduction	1/3745	24/107890	0.571714	0.893261	0.838304	TraesCS3A02G210400	1	BP
GO:0006367	transcription initiation from RNA polymerase II promoter	9/3745	265/107890	0.573115	0.894903	0.839845	TraesCS6D02G294500/TraesCS6D02G237400/TraesCS6D02G266800/TraesCS6D02G250200/TraesCS6B02G083500/TraesCS1B02G258300/TraesCS6B02G345700/TraesCS6B02G376500/TraesCS6B02G341600	9	BP
GO:0015868	purine ribonucleotide transport	2/3745	55/107890	0.573446	0.894903	0.839845	TraesCS4B02G119700/TraesCS3A02G206300	2	BP
GO:0046520	sphingoid biosynthetic process	5/3745	146/107890	0.574723	0.896154	0.841019	TraesCS7A02G255400/TraesCS6D02G210300/TraesCS6B02G241000/TraesCS6B02G335400/TraesCS5D02G199900	5	BP
GO:0033238	regulation of cellular amine metabolic process	6/3745	176/107890	0.57493	0.896154	0.841019	TraesCS6D02G195300/TraesCS6D02G335000/TraesCS6D02G251700/TraesCS7A02G261700/TraesCS6B02G385200/TraesCS6B02G226200	6	BP
GO:0000479	endonucleolytic cleavage of tricistronic rRNA transcript (SSU-rRNA, 5.8S rRNA, LSU-rRNA)	3/3745	86/107890	0.577488	0.898354	0.843084	TraesCS6D02G272800/TraesCS4D02G167600/TraesCS3A02G209700	3	BP
GO:0006829	zinc ion transport	3/3745	86/107890	0.577488	0.898354	0.843084	TraesCS4D02G146900/TraesCS7A02G419500/TraesCS7A02G420000	3	BP
GO:0048806	genitalia development	3/3745	86/107890	0.577488	0.898354	0.843084	TraesCS6D02G190000/TraesCS4D02G128200/TraesCS6B02G225700	3	BP
GO:0042327	positive regulation of phosphorylation	15/3745	444/107890	0.578653	0.898354	0.843084	TraesCS6D02G332100/TraesCS6D02G328800/TraesCS5B02G154600/TraesCS4B02G116000/TraesCS6B02G362300/TraesCS6B02G226200/TraesCS4B02G115800/TraesCS6B02G382700/TraesCS6B02G352700/TraesCS6B02G379500/TraesCS5D02G184300/TraesCS6B02G358800/TraesCS5A02G179700/TraesCS1B02G375400/TraesCS5B02G177500	15	BP
GO:0006032	chitin catabolic process	6/3745	177/107890	0.580464	0.898354	0.843084	TraesCS6D02G190500/TraesCS6D02G199500/TraesCS3D02G366500/TraesCS4D02G142000/TraesCS3A02G312500/TraesCS2A02G350900	6	BP
GO:0034097	response to cytokine	5/3745	147/107890	0.580793	0.898354	0.843084	TraesCS6A02G406200/TraesCS6B02G350800/TraesCS4D02G341000/TraesCS4B02G346100/TraesCS5A02G515000	5	BP
GO:0045137	development of primary sexual characteristics	5/3745	147/107890	0.580793	0.898354	0.843084	TraesCS6D02G190000/TraesCS6B02G421000/TraesCS4D02G128200/TraesCS6B02G225700/TraesCS2B02G594400	5	BP
GO:0006075	(1->3)-beta-D-glucan biosynthetic process	2/3745	56/107890	0.583284	0.898354	0.843084	TraesCS6D02G406000/TraesCS6B02G468200	2	BP
GO:0019755	one-carbon compound transport	2/3745	56/107890	0.583284	0.898354	0.843084	TraesCS4B02G349500/TraesCS3D02G163400	2	BP
GO:0009065	glutamine family amino acid catabolic process	3/3745	87/107890	0.585353	0.898354	0.843084	TraesCS5B02G154400/TraesCS1D02G012300/TraesCS2D02G512000	3	BP
GO:0090092	regulation of transmembrane receptor protein serine/threonine kinase signaling pathway	3/3745	87/107890	0.585353	0.898354	0.843084	TraesCS6D02G270300/TraesCS6A02G406200/TraesCS6D02G092000	3	BP
GO:0006026	aminoglycan catabolic process	6/3745	178/107890	0.585961	0.898354	0.843084	TraesCS6D02G190500/TraesCS6D02G199500/TraesCS3D02G366500/TraesCS4D02G142000/TraesCS3A02G312500/TraesCS2A02G350900	6	BP
GO:0006030	chitin metabolic process	6/3745	178/107890	0.585961	0.898354	0.843084	TraesCS6D02G190500/TraesCS6D02G199500/TraesCS3D02G366500/TraesCS4D02G142000/TraesCS3A02G312500/TraesCS2A02G350900	6	BP
GO:0006541	glutamine metabolic process	6/3745	178/107890	0.585961	0.898354	0.843084	TraesCS5A02G153900/TraesCS6A02G298100/TraesCS5B02G154400/TraesCS4D02G126400/TraesCS4D02G047400/TraesCS4A02G266900	6	BP
GO:0000080	mitotic G1 phase	1/3745	25/107890	0.586584	0.898354	0.843084	TraesCS6D02G233200	1	BP
GO:0000710	meiotic mismatch repair	1/3745	25/107890	0.586584	0.898354	0.843084	TraesCS1B02G328200	1	BP
GO:0007272	ensheathment of neurons	1/3745	25/107890	0.586584	0.898354	0.843084	TraesCS6B02G421000	1	BP
GO:0008366	axon ensheathment	1/3745	25/107890	0.586584	0.898354	0.843084	TraesCS6B02G421000	1	BP
GO:0010450	inflorescence meristem growth	1/3745	25/107890	0.586584	0.898354	0.843084	TraesCS6D02G220400	1	BP
GO:0015689	molybdate ion transport	1/3745	25/107890	0.586584	0.898354	0.843084	TraesCS2A02G496700	1	BP
GO:0019233	sensory perception of pain	1/3745	25/107890	0.586584	0.898354	0.843084	TraesCS3D02G369700	1	BP
GO:0032872	regulation of stress-activated MAPK cascade	1/3745	25/107890	0.586584	0.898354	0.843084	TraesCS6D02G276500	1	BP
GO:0035051	cardiocyte differentiation	1/3745	25/107890	0.586584	0.898354	0.843084	TraesCS2D02G480300	1	BP
GO:0045168	cell-cell signaling involved in cell fate commitment	1/3745	25/107890	0.586584	0.898354	0.843084	TraesCS3D02G163900	1	BP
GO:0046328	regulation of JNK cascade	1/3745	25/107890	0.586584	0.898354	0.843084	TraesCS6D02G276500	1	BP
GO:0046349	amino sugar biosynthetic process	1/3745	25/107890	0.586584	0.898354	0.843084	TraesCS4D02G126400	1	BP
GO:0060048	cardiac muscle contraction	1/3745	25/107890	0.586584	0.898354	0.843084	TraesCS6B02G344100	1	BP
GO:1903312	negative regulation of mRNA metabolic process	1/3745	25/107890	0.586584	0.898354	0.843084	TraesCS7B02G114200	1	BP
GO:2000573	positive regulation of DNA biosynthetic process	1/3745	25/107890	0.586584	0.898354	0.843084	TraesCS2D02G339900	1	BP
GO:0009944	polarity specification of adaxial/abaxial axis	13/3745	387/107890	0.586596	0.898354	0.843084	TraesCS7A02G255400/TraesCS7A02G211100/TraesCS7A02G263800/TraesCS6D02G242100/TraesCS6D02G220400/TraesCS6D02G361900/TraesCS6D02G269400/TraesCS6B02G288700/TraesCS6B02G366900/TraesCS5B02G157800/TraesCS6B02G472100/TraesCS6B02G414700/TraesCS4D02G120400	13	BP
GO:0032984	protein-containing complex disassembly	10/3745	298/107890	0.587384	0.899036	0.843724	TraesCS6D02G190300/TraesCS6B02G447400/TraesCSU02G051800/TraesCS6A02G403500/TraesCSU02G248500/TraesCS6B02G338000/TraesCS3D02G164500/TraesCS6B02G386600/TraesCS6B02G265700/TraesCS6B02G411200	10	BP
GO:0009937	regulation of gibberellic acid mediated signaling pathway	4/3745	118/107890	0.588851	0.900233	0.844847	TraesCS7A02G225700/TraesCS3D02G385400/TraesCS1B02G265900/TraesCS6B02G429500	4	BP
GO:0016482	cytosolic transport	4/3745	118/107890	0.588851	0.900233	0.844847	TraesCS6D02G181400/TraesCS6B02G377200/TraesCS6B02G396200/TraesCS6B02G443700	4	BP
GO:0009582	detection of abiotic stimulus	8/3745	239/107890	0.590802	0.902691	0.847154	TraesCS6D02G187200/TraesCS6D02G211700/TraesCS6D02G305800/TraesCS1B02G244300/TraesCS6B02G356400/TraesCS6B02G224100/TraesCS3A02G210100/TraesCS4D02G121300	8	BP
GO:0046854	phosphatidylinositol phosphorylation	6/3745	179/107890	0.591421	0.903112	0.847549	TraesCS7A02G213100/TraesCS6D02G358000/TraesCS6D02G390100/TraesCS6D02G216000/TraesCS6B02G451200/TraesCS6B02G411500	6	BP
GO:0042219	cellular modified amino acid catabolic process	2/3745	57/107890	0.592954	0.904659	0.849001	TraesCS3B02G119800/TraesCS6B02G337600	2	BP
GO:0048871	multicellular organismal homeostasis	3/3745	88/107890	0.593123	0.904659	0.849001	TraesCS6D02G315400/TraesCS4B02G358500/TraesCS6B02G366400	3	BP
GO:0009641	shade avoidance	4/3745	119/107890	0.59552	0.906061	0.850316	TraesCS6D02G294600/TraesCS6D02G305800/TraesCS6B02G356400/TraesCS6B02G345800	4	BP
GO:0009742	brassinosteroid mediated signaling pathway	10/3745	300/107890	0.595825	0.906061	0.850316	TraesCS6D02G186900/TraesCS6D02G293200/TraesCS1B02G262200/TraesCS1B02G255700/TraesCS4B02G288000/TraesCS7D02G176700/TraesCS6B02G223700/TraesCS6B02G388600/TraesCS6B02G343900/TraesCS5D02G225200	10	BP
GO:0051554	flavonol metabolic process	10/3745	300/107890	0.595825	0.906061	0.850316	TraesCS6D02G388700/TraesCS4B02G081200/TraesCS7D02G341500/TraesCS3A02G534900/TraesCS3D02G540200/TraesCS6B02G449400/TraesCS3B02G612000/TraesCS1D02G072700/TraesCS7D02G190600/TraesCS3D02G403000	10	BP
GO:0051555	flavonol biosynthetic process	10/3745	300/107890	0.595825	0.906061	0.850316	TraesCS6D02G388700/TraesCS4B02G081200/TraesCS7D02G341500/TraesCS3A02G534900/TraesCS3D02G540200/TraesCS6B02G449400/TraesCS3B02G612000/TraesCS1D02G072700/TraesCS7D02G190600/TraesCS3D02G403000	10	BP
GO:0006289	nucleotide-excision repair	7/3745	210/107890	0.595882	0.906061	0.850316	TraesCS6D02G315400/TraesCS7A02G214200/TraesCS6D02G302200/TraesCS7B02G113500/TraesCS6B02G233800/TraesCS6B02G366400/TraesCS6B02G353100	7	BP
GO:0010325	raffinose family oligosaccharide biosynthetic process	3/3745	89/107890	0.600798	0.906061	0.850316	TraesCS3D02G385400/TraesCS1B02G265900/TraesCS6B02G429500	3	BP
GO:0031398	positive regulation of protein ubiquitination	3/3745	89/107890	0.600798	0.906061	0.850316	TraesCS6D02G354500/TraesCS6B02G402400/TraesCS4B02G208900	3	BP
GO:1903830	magnesium ion transmembrane transport	3/3745	89/107890	0.600798	0.906061	0.850316	TraesCS1B02G275400/TraesCS3A02G207100/TraesCS6B02G340400	3	BP
GO:0006083	acetate metabolic process	1/3745	26/107890	0.600937	0.906061	0.850316	TraesCS6B02G431000	1	BP
GO:0006356	regulation of transcription by RNA polymerase I	1/3745	26/107890	0.600937	0.906061	0.850316	TraesCS4B02G109300	1	BP
GO:0006572	tyrosine catabolic process	1/3745	26/107890	0.600937	0.906061	0.850316	TraesCS6B02G369300	1	BP
GO:0007080	mitotic metaphase plate congression	1/3745	26/107890	0.600937	0.906061	0.850316	TraesCS6D02G233200	1	BP
GO:0010046	response to mycotoxin	1/3745	26/107890	0.600937	0.906061	0.850316	TraesCS4D02G121300	1	BP
GO:0031155	regulation of reproductive fruiting body development	1/3745	26/107890	0.600937	0.906061	0.850316	TraesCS6B02G403400	1	BP
GO:0031156	regulation of sorocarp development	1/3745	26/107890	0.600937	0.906061	0.850316	TraesCS6B02G403400	1	BP
GO:0035023	regulation of Rho protein signal transduction	1/3745	26/107890	0.600937	0.906061	0.850316	TraesCS6B02G335200	1	BP
GO:0048813	dendrite morphogenesis	1/3745	26/107890	0.600937	0.906061	0.850316	TraesCS6B02G335200	1	BP
GO:0051310	metaphase plate congression	1/3745	26/107890	0.600937	0.906061	0.850316	TraesCS6D02G233200	1	BP
GO:0051318	G1 phase	1/3745	26/107890	0.600937	0.906061	0.850316	TraesCS6D02G233200	1	BP
GO:0075260	regulation of spore-bearing organ development	1/3745	26/107890	0.600937	0.906061	0.850316	TraesCS6B02G403400	1	BP
GO:0065001	specification of axis polarity	13/3745	391/107890	0.601394	0.906228	0.850474	TraesCS7A02G255400/TraesCS7A02G211100/TraesCS7A02G263800/TraesCS6D02G242100/TraesCS6D02G220400/TraesCS6D02G361900/TraesCS6D02G269400/TraesCS6B02G288700/TraesCS6B02G366900/TraesCS5B02G157800/TraesCS6B02G472100/TraesCS6B02G414700/TraesCS4D02G120400	13	BP
GO:0030042	actin filament depolymerization	4/3745	120/107890	0.602124	0.90629	0.850532	TraesCS6B02G447400/TraesCS6A02G403500/TraesCS6B02G338000/TraesCS6B02G265700	4	BP
GO:0045862	positive regulation of proteolysis	4/3745	120/107890	0.602124	0.90629	0.850532	TraesCS6B02G335200/TraesCS5B02G153700/TraesCS6B02G341600/TraesCS4B02G208900	4	BP
GO:0043066	negative regulation of apoptotic process	6/3745	182/107890	0.60757	0.908193	0.852318	TraesCS6D02G293100/TraesCS4B02G109300/TraesCS6B02G405200/TraesCS6B02G233600/TraesCS6B02G343800/TraesCS5D02G479300	6	BP
GO:0009902	chloroplast relocation	14/3745	423/107890	0.609137	0.908193	0.852318	TraesCS6D02G183600/TraesCS7A02G222800/TraesCS6D02G202300/TraesCS6D02G267500/TraesCS6D02G186300/TraesCS6D02G204200/TraesCS6B02G010000/TraesCS1B02G254000/TraesCS1B02G255100/TraesCS6B02G233800/TraesCS5B02G155200/TraesCS6B02G344700/TraesCS6B02G223400/TraesCS6B02G410200	14	BP
GO:0051667	establishment of plastid localization	14/3745	423/107890	0.609137	0.908193	0.852318	TraesCS6D02G183600/TraesCS7A02G222800/TraesCS6D02G202300/TraesCS6D02G267500/TraesCS6D02G186300/TraesCS6D02G204200/TraesCS6B02G010000/TraesCS1B02G254000/TraesCS1B02G255100/TraesCS6B02G233800/TraesCS5B02G155200/TraesCS6B02G344700/TraesCS6B02G223400/TraesCS6B02G410200	14	BP
GO:0007143	female meiotic nuclear division	2/3745	59/107890	0.611785	0.908193	0.852318	TraesCS5D02G454200/TraesCS6B02G354700	2	BP
GO:0007444	imaginal disc development	2/3745	59/107890	0.611785	0.908193	0.852318	TraesCS6B02G335200/TraesCS4A02G158000	2	BP
GO:0016122	xanthophyll metabolic process	2/3745	59/107890	0.611785	0.908193	0.852318	TraesCS3A02G208800/TraesCS6B02G432200	2	BP
GO:0032102	negative regulation of response to external stimulus	2/3745	59/107890	0.611785	0.908193	0.852318	TraesCS6D02G196000/TraesCS5B02G153300	2	BP
GO:0034312	diol biosynthetic process	2/3745	59/107890	0.611785	0.908193	0.852318	TraesCS2D02G218400/TraesCS6B02G348200	2	BP
GO:0048568	embryonic organ development	2/3745	59/107890	0.611785	0.908193	0.852318	TraesCS1D02G288200/TraesCS4D02G126400	2	BP
GO:0048832	specification of plant organ number	2/3745	59/107890	0.611785	0.908193	0.852318	TraesCS7A02G260600/TraesCS3A02G434900	2	BP
GO:0051503	adenine nucleotide transport	2/3745	59/107890	0.611785	0.908193	0.852318	TraesCS4B02G119700/TraesCS3A02G206300	2	BP
GO:0019243	methylglyoxal catabolic process to D-lactate via S-lactoyl-glutathione	10/3745	304/107890	0.61246	0.908193	0.852318	TraesCS6D02G221800/TraesCS6D02G216200/TraesCS6D02G393200/TraesCS7A02G252400/TraesCS7A02G261700/TraesCS1B02G273600/TraesCS5B02G464300/TraesCS1D02G132700/TraesCS5D02G550100/TraesCS6B02G455600	10	BP
GO:0019750	chloroplast localization	14/3745	424/107890	0.612638	0.908193	0.852318	TraesCS6D02G183600/TraesCS7A02G222800/TraesCS6D02G202300/TraesCS6D02G267500/TraesCS6D02G186300/TraesCS6D02G204200/TraesCS6B02G010000/TraesCS1B02G254000/TraesCS1B02G255100/TraesCS6B02G233800/TraesCS5B02G155200/TraesCS6B02G344700/TraesCS6B02G223400/TraesCS6B02G410200	14	BP
GO:0015837	amine transport	9/3745	274/107890	0.613042	0.908193	0.852318	TraesCS6D02G331400/TraesCS6D02G235500/TraesCS2B02G343300/TraesCS4B02G349500/TraesCS4B02G081100/TraesCS6B02G382000/TraesCS3B02G441200/TraesCS3D02G163400/TraesCS4B02G139700	9	BP
GO:0019226	transmission of nerve impulse	15/3745	454/107890	0.613058	0.908193	0.852318	TraesCS6D02G193800/TraesCS6D02G187000/TraesCS6D02G349100/TraesCS6D02G254300/TraesCS1A02G089300/TraesCS1D02G325000/TraesCS1B02G252100/TraesCS6B02G342500/TraesCS6B02G421000/TraesCS6B02G377200/TraesCS6B02G344100/TraesCS6B02G432900/TraesCS6B02G239600/TraesCS4D02G305100/TraesCS5D02G479300	15	BP
GO:0035196	production of miRNAs involved in gene silencing by miRNA	15/3745	454/107890	0.613058	0.908193	0.852318	TraesCS7A02G211100/TraesCS6D02G203100/TraesCS7A02G231500/TraesCS6D02G269400/TraesCS3B02G487900/TraesCS5B02G154600/TraesCS6B02G449300/TraesCS6B02G468200/TraesCS6B02G447600/TraesCS6B02G350800/TraesCS3D02G165900/TraesCS4B02G117900/TraesCS4B02G117800/TraesCS6B02G466700/TraesCS4B02G118400	15	BP
GO:0043624	cellular protein complex disassembly	8/3745	244/107890	0.614053	0.908193	0.852318	TraesCS6D02G190300/TraesCS6B02G447400/TraesCSU02G051800/TraesCS6A02G403500/TraesCS6B02G338000/TraesCS3D02G164500/TraesCS6B02G265700/TraesCS6B02G411200	8	BP
GO:0061061	muscle structure development	8/3745	244/107890	0.614053	0.908193	0.852318	TraesCS6D02G270300/TraesCS7A02G262700/TraesCS7A02G275500/TraesCS2D02G480300/TraesCS5B02G156800/TraesCS4D02G126400/TraesCS6B02G452800/TraesCS3D02G166900	8	BP
GO:0000098	sulfur amino acid catabolic process	1/3745	27/107890	0.614793	0.908193	0.852318	TraesCS6B02G354300	1	BP
GO:0003015	heart process	1/3745	27/107890	0.614793	0.908193	0.852318	TraesCS6B02G344100	1	BP
GO:0008016	regulation of heart contraction	1/3745	27/107890	0.614793	0.908193	0.852318	TraesCS6B02G344100	1	BP
GO:0008298	intracellular mRNA localization	1/3745	27/107890	0.614793	0.908193	0.852318	TraesCS4D02G305100	1	BP
GO:0010001	glial cell differentiation	1/3745	27/107890	0.614793	0.908193	0.852318	TraesCS6B02G421000	1	BP
GO:0015885	5-formyltetrahydrofolate transport	1/3745	27/107890	0.614793	0.908193	0.852318	TraesCS1B02G254500	1	BP
GO:0018871	1-aminocyclopropane-1-carboxylate metabolic process	1/3745	27/107890	0.614793	0.908193	0.852318	TraesCS2A02G396400	1	BP
GO:0030166	proteoglycan biosynthetic process	1/3745	27/107890	0.614793	0.908193	0.852318	TraesCS3A02G207900	1	BP
GO:0051972	regulation of telomerase activity	1/3745	27/107890	0.614793	0.908193	0.852318	TraesCS2D02G339900	1	BP
GO:0060047	heart contraction	1/3745	27/107890	0.614793	0.908193	0.852318	TraesCS6B02G344100	1	BP
GO:1901334	lactone metabolic process	1/3745	27/107890	0.614793	0.908193	0.852318	TraesCS4B02G151300	1	BP
GO:1901336	lactone biosynthetic process	1/3745	27/107890	0.614793	0.908193	0.852318	TraesCS4B02G151300	1	BP
GO:1901600	strigolactone metabolic process	1/3745	27/107890	0.614793	0.908193	0.852318	TraesCS4B02G151300	1	BP
GO:1901601	strigolactone biosynthetic process	1/3745	27/107890	0.614793	0.908193	0.852318	TraesCS4B02G151300	1	BP
GO:1903522	regulation of blood circulation	1/3745	27/107890	0.614793	0.908193	0.852318	TraesCS6B02G344100	1	BP
GO:0006112	energy reserve metabolic process	7/3745	214/107890	0.615663	0.908745	0.852835	TraesCS6D02G287000/TraesCS3A02G366300/TraesCS1B02G277500/TraesCS6B02G336400/TraesCS3A02G211000/TraesCS4D02G126400/TraesCS6B02G257400	7	BP
GO:0034314	Arp2/3 complex-mediated actin nucleation	3/3745	91/107890	0.615859	0.908745	0.852835	TraesCS7A02G518700/TraesCS6B02G240500/TraesCS6B02G432000	3	BP
GO:0046519	sphingoid metabolic process	5/3745	153/107890	0.616204	0.908745	0.852835	TraesCS7A02G255400/TraesCS6D02G210300/TraesCS6B02G241000/TraesCS6B02G335400/TraesCS5D02G199900	5	BP
GO:0051644	plastid localization	14/3745	426/107890	0.619594	0.911613	0.855528	TraesCS6D02G183600/TraesCS7A02G222800/TraesCS6D02G202300/TraesCS6D02G267500/TraesCS6D02G186300/TraesCS6D02G204200/TraesCS6B02G010000/TraesCS1B02G254000/TraesCS1B02G255100/TraesCS6B02G233800/TraesCS5B02G155200/TraesCS6B02G344700/TraesCS6B02G223400/TraesCS6B02G410200	14	BP
GO:0003012	muscle system process	2/3745	60/107890	0.620948	0.911613	0.855528	TraesCS6B02G344100/TraesCS6B02G396100	2	BP
GO:0006904	vesicle docking involved in exocytosis	2/3745	60/107890	0.620948	0.911613	0.855528	TraesCS4D02G112900/TraesCS6B02G387300	2	BP
GO:0010623	programmed cell death involved in cell development	2/3745	60/107890	0.620948	0.911613	0.855528	TraesCS1B02G033200/TraesCS1D02G026500	2	BP
GO:0031338	regulation of vesicle fusion	2/3745	60/107890	0.620948	0.911613	0.855528	TraesCS7A02G270600/TraesCS6B02G415900	2	BP
GO:0006775	fat-soluble vitamin metabolic process	5/3745	154/107890	0.621931	0.911613	0.855528	TraesCS6D02G286900/TraesCS6D02G245200/TraesCS6D02G219600/TraesCS6B02G336300/TraesCS6B02G369300	5	BP
GO:0035637	multicellular organismal signaling	15/3745	457/107890	0.623124	0.911613	0.855528	TraesCS6D02G193800/TraesCS6D02G187000/TraesCS6D02G349100/TraesCS6D02G254300/TraesCS1A02G089300/TraesCS1D02G325000/TraesCS1B02G252100/TraesCS6B02G342500/TraesCS6B02G421000/TraesCS6B02G377200/TraesCS6B02G344100/TraesCS6B02G432900/TraesCS6B02G239600/TraesCS4D02G305100/TraesCS5D02G479300	15	BP
GO:0000209	protein polyubiquitination	13/3745	397/107890	0.623127	0.911613	0.855528	TraesCS6D02G195300/TraesCS6D02G233200/TraesCS6D02G327000/TraesCS6D02G354500/TraesCS4A02G185800/TraesCS5B02G153700/TraesCS6B02G395000/TraesCS2D02G162600/TraesCS2B02G182300/TraesCS2A02G156800/TraesCS2D02G063300/TraesCS2B02G077400/TraesCS2A02G065200	13	BP
GO:0006071	glycerol metabolic process	3/3745	92/107890	0.623244	0.911613	0.855528	TraesCS6D02G259000/TraesCS7A02G263000/TraesCS6B02G226700	3	BP
GO:1903322	positive regulation of protein modification by small protein conjugation or removal	3/3745	92/107890	0.623244	0.911613	0.855528	TraesCS6D02G354500/TraesCS6B02G402400/TraesCS4B02G208900	3	BP
GO:0019321	pentose metabolic process	9/3745	277/107890	0.62592	0.911613	0.855528	TraesCS6D02G195700/TraesCS7A02G231700/TraesCS5D02G404300/TraesCS6B02G415700/TraesCS4B02G173300/TraesCS2D02G111400/TraesCS2B02G129600/TraesCS5B02G244000/TraesCS5D02G253400	9	BP
GO:0048451	petal formation	12/3745	368/107890	0.627098	0.911613	0.855528	TraesCS7A02G245400/TraesCS6D02G304300/TraesCS6D02G356500/TraesCS6D02G208400/TraesCS2A02G251700/TraesCS1B02G252400/TraesCS6B02G354900/TraesCS6B02G333400/TraesCS6B02G233400/TraesCS6B02G410200/TraesCS4B02G118300/TraesCS5B02G158100	12	BP
GO:0003013	circulatory system process	5/3745	155/107890	0.627607	0.911613	0.855528	TraesCS3D02G385400/TraesCS2D02G480300/TraesCS6B02G425700/TraesCS6B02G344100/TraesCS5D02G479300	5	BP
GO:0006268	DNA unwinding involved in DNA replication	1/3745	28/107890	0.628167	0.911613	0.855528	TraesCS1B02G274600	1	BP
GO:0006269	DNA replication, synthesis of RNA primer	1/3745	28/107890	0.628167	0.911613	0.855528	TraesCS1B02G242000	1	BP
GO:0006567	threonine catabolic process	1/3745	28/107890	0.628167	0.911613	0.855528	TraesCS1B02G257300	1	BP
GO:0006848	pyruvate transport	1/3745	28/107890	0.628167	0.911613	0.855528	TraesCS5B02G157900	1	BP
GO:0008653	lipopolysaccharide metabolic process	1/3745	28/107890	0.628167	0.911613	0.855528	TraesCS7A02G419200	1	BP
GO:0009088	threonine biosynthetic process	1/3745	28/107890	0.628167	0.911613	0.855528	TraesCS6B02G467000	1	BP
GO:0009103	lipopolysaccharide biosynthetic process	1/3745	28/107890	0.628167	0.911613	0.855528	TraesCS7A02G419200	1	BP
GO:0009249	protein lipoylation	1/3745	28/107890	0.628167	0.911613	0.855528	TraesCS6D02G217500	1	BP
GO:0009650	UV protection	1/3745	28/107890	0.628167	0.911613	0.855528	TraesCS7A02G267500	1	BP
GO:0018126	protein hydroxylation	1/3745	28/107890	0.628167	0.911613	0.855528	TraesCS6B02G365100	1	BP
GO:0031032	actomyosin structure organization	1/3745	28/107890	0.628167	0.911613	0.855528	TraesCS6B02G335200	1	BP
GO:0036525	protein deglycation	1/3745	28/107890	0.628167	0.911613	0.855528	TraesCS7D02G548900	1	BP
GO:0090480	purine nucleotide-sugar transmembrane transport	1/3745	28/107890	0.628167	0.911613	0.855528	TraesCS4D02G245400	1	BP
GO:1901475	pyruvate transmembrane transport	1/3745	28/107890	0.628167	0.911613	0.855528	TraesCS5B02G157900	1	BP
GO:0034406	cell wall beta-glucan metabolic process	6/3745	186/107890	0.628543	0.911613	0.855528	TraesCS5B02G051300/TraesCS7A02G264200/TraesCS6B02G226700/TraesCS5B02G155400/TraesCS5B02G155600/TraesCS7B02G271600	6	BP
GO:0052541	plant-type cell wall cellulose metabolic process	6/3745	186/107890	0.628543	0.911613	0.855528	TraesCS5B02G051300/TraesCS7A02G264200/TraesCS6B02G226700/TraesCS5B02G155400/TraesCS5B02G155600/TraesCS7B02G271600	6	BP
GO:0061727	methylglyoxal catabolic process to lactate	10/3745	308/107890	0.628748	0.911613	0.855528	TraesCS6D02G221800/TraesCS6D02G216200/TraesCS6D02G393200/TraesCS7A02G252400/TraesCS7A02G261700/TraesCS1B02G273600/TraesCS5B02G464300/TraesCS1D02G132700/TraesCS5D02G550100/TraesCS6B02G455600	10	BP
GO:0002165	instar larval or pupal development	2/3745	61/107890	0.629943	0.911613	0.855528	TraesCS6D02G379500/TraesCS6B02G335200	2	BP
GO:0009956	radial pattern formation	2/3745	61/107890	0.629943	0.911613	0.855528	TraesCS2D02G506500/TraesCS3B02G369300	2	BP
GO:0090116	C-5 methylation of cytosine	2/3745	61/107890	0.629943	0.911613	0.855528	TraesCS6B02G419000/TraesCS6B02G369700	2	BP
GO:0140029	exocytic process	2/3745	61/107890	0.629943	0.911613	0.855528	TraesCS4D02G112900/TraesCS6B02G387300	2	BP
GO:0016032	viral process	16/3745	490/107890	0.632956	0.914135	0.857894	TraesCS6D02G207800/TraesCS6D02G240800/TraesCS6D02G219400/TraesCS6D02G091700/TraesCS2A02G467700/TraesCS7D02G156000/TraesCS1B02G244500/TraesCS1B02G254800/TraesCS4B02G081100/TraesCS2D02G480300/TraesCS3D02G164500/TraesCS6B02G412000/TraesCS6B02G466700/TraesCS3A02G210100/TraesCS2D02G534500/TraesCS2A02G532700	16	BP
GO:0035384	thioester biosynthetic process	4/3745	125/107890	0.634145	0.914135	0.857894	TraesCS7B02G283000/TraesCS6B02G431000/TraesCS6B02G342000/TraesCS7D02G084700	4	BP
GO:0044773	mitotic DNA damage checkpoint	4/3745	125/107890	0.634145	0.914135	0.857894	TraesCS6D02G195300/TraesCS6D02G305800/TraesCS7A02G214200/TraesCS6B02G356400	4	BP
GO:0071616	acyl-CoA biosynthetic process	4/3745	125/107890	0.634145	0.914135	0.857894	TraesCS7B02G283000/TraesCS6B02G431000/TraesCS6B02G342000/TraesCS7D02G084700	4	BP
GO:0002164	larval development	11/3745	340/107890	0.63542	0.914135	0.857894	TraesCS6D02G187100/TraesCS6D02G253600/TraesCS6D02G190000/TraesCS6D02G256000/TraesCS4B02G218100/TraesCS3D02G163900/TraesCS6B02G225700/TraesCS6B02G224000/TraesCS4A02G158000/TraesCS6B02G239500/TraesCS6B02G396200	11	BP
GO:0009955	adaxial/abaxial pattern specification	16/3745	491/107890	0.636141	0.914135	0.857894	TraesCS7A02G278700/TraesCS7A02G255400/TraesCS7A02G211100/TraesCS7A02G263800/TraesCS6D02G242100/TraesCS6D02G220400/TraesCS6D02G361900/TraesCS6D02G269400/TraesCS6B02G288700/TraesCS6B02G366900/TraesCS5B02G157800/TraesCS6B02G472100/TraesCS7B02G176600/TraesCS6B02G466700/TraesCS6B02G414700/TraesCS4D02G120400	16	BP
GO:0030488	tRNA methylation	3/3745	94/107890	0.637719	0.914135	0.857894	TraesCS6D02G199000/TraesCS7A02G414100/TraesCS6B02G333000	3	BP
GO:0006002	fructose 6-phosphate metabolic process	2/3745	62/107890	0.63877	0.914135	0.857894	TraesCS7A02G226000/TraesCS4D02G126400	2	BP
GO:0006074	(1->3)-beta-D-glucan metabolic process	2/3745	62/107890	0.63877	0.914135	0.857894	TraesCS6D02G406000/TraesCS6B02G468200	2	BP
GO:0006566	threonine metabolic process	2/3745	62/107890	0.63877	0.914135	0.857894	TraesCS1B02G257300/TraesCS6B02G467000	2	BP
GO:0030582	reproductive fruiting body development	2/3745	62/107890	0.63877	0.914135	0.857894	TraesCS3A02G211000/TraesCS6B02G403400	2	BP
GO:0031110	regulation of microtubule polymerization or depolymerization	2/3745	62/107890	0.63877	0.914135	0.857894	TraesCS1B02G267200/TraesCS3D02G164500	2	BP
GO:0045931	positive regulation of mitotic cell cycle	2/3745	62/107890	0.63877	0.914135	0.857894	TraesCS7B02G216700/TraesCS7D02G312700	2	BP
GO:0075259	spore-bearing structure development	2/3745	62/107890	0.63877	0.914135	0.857894	TraesCS3A02G211000/TraesCS6B02G403400	2	BP
GO:0035195	gene silencing by miRNA	16/3745	492/107890	0.639311	0.914135	0.857894	TraesCS7A02G211100/TraesCS6D02G203100/TraesCS7A02G231500/TraesCS6D02G269400/TraesCS3B02G487900/TraesCS5D02G454200/TraesCS5B02G154600/TraesCS6B02G449300/TraesCS6B02G468200/TraesCS6B02G447600/TraesCS6B02G350800/TraesCS3D02G165900/TraesCS4B02G117900/TraesCS4B02G117800/TraesCS6B02G466700/TraesCS4B02G118400	16	BP
GO:0000122	negative regulation of transcription by RNA polymerase II	7/3745	219/107890	0.63963	0.914135	0.857894	TraesCS7A02G251900/TraesCS1B02G265200/TraesCS6A02G177000/TraesCS6B02G350800/TraesCS7B02G261800/TraesCS7A02G417200/TraesCS6D02G296400	7	BP
GO:0002703	regulation of leukocyte mediated immunity	1/3745	29/107890	0.641077	0.914135	0.857894	TraesCS6D02G270300	1	BP
GO:0006999	nuclear pore organization	1/3745	29/107890	0.641077	0.914135	0.857894	TraesCS6D02G241100	1	BP
GO:0007350	blastoderm segmentation	1/3745	29/107890	0.641077	0.914135	0.857894	TraesCS4D02G305100	1	BP
GO:0010196	nonphotochemical quenching	1/3745	29/107890	0.641077	0.914135	0.857894	TraesCS3A02G210000	1	BP
GO:0043982	histone H4-K8 acetylation	1/3745	29/107890	0.641077	0.914135	0.857894	TraesCS6D02G232000	1	BP
GO:0045144	meiotic sister chromatid segregation	1/3745	29/107890	0.641077	0.914135	0.857894	TraesCS6B02G399000	1	BP
GO:0046786	viral replication complex formation and maintenance	1/3745	29/107890	0.641077	0.914135	0.857894	TraesCS6D02G240800	1	BP
GO:0051085	chaperone cofactor-dependent protein refolding	1/3745	29/107890	0.641077	0.914135	0.857894	TraesCS6B02G371500	1	BP
GO:0051177	meiotic sister chromatid cohesion	1/3745	29/107890	0.641077	0.914135	0.857894	TraesCS6B02G399000	1	BP
GO:0051303	establishment of chromosome localization	1/3745	29/107890	0.641077	0.914135	0.857894	TraesCS6D02G233200	1	BP
GO:1990066	energy quenching	1/3745	29/107890	0.641077	0.914135	0.857894	TraesCS3A02G210000	1	BP
GO:0032147	activation of protein kinase activity	9/3745	281/107890	0.64273	0.915995	0.85964	TraesCS6D02G328800/TraesCS5B02G154600/TraesCS6B02G226200/TraesCS6B02G352700/TraesCS6B02G379500/TraesCS5D02G184300/TraesCS6B02G358800/TraesCS5A02G179700/TraesCS5B02G177500	9	BP
GO:0071367	cellular response to brassinosteroid stimulus	10/3745	312/107890	0.64467	0.918261	0.861766	TraesCS6D02G186900/TraesCS6D02G293200/TraesCS1B02G262200/TraesCS1B02G255700/TraesCS4B02G288000/TraesCS7D02G176700/TraesCS6B02G223700/TraesCS6B02G388600/TraesCS6B02G343900/TraesCS5D02G225200	10	BP
GO:0006528	asparagine metabolic process	2/3745	63/107890	0.64743	0.918349	0.861849	TraesCS5A02G153900/TraesCS2D02G512000	2	BP
GO:0006573	valine metabolic process	2/3745	63/107890	0.64743	0.918349	0.861849	TraesCS6D02G201500/TraesCS3A02G205100	2	BP
GO:0009438	methylglyoxal metabolic process	10/3745	313/107890	0.648591	0.918349	0.861849	TraesCS6D02G221800/TraesCS6D02G216200/TraesCS6D02G393200/TraesCS7A02G252400/TraesCS7A02G261700/TraesCS1B02G273600/TraesCS5B02G464300/TraesCS1D02G132700/TraesCS5D02G550100/TraesCS6B02G455600	10	BP
GO:0051596	methylglyoxal catabolic process	10/3745	313/107890	0.648591	0.918349	0.861849	TraesCS6D02G221800/TraesCS6D02G216200/TraesCS6D02G393200/TraesCS7A02G252400/TraesCS7A02G261700/TraesCS1B02G273600/TraesCS5B02G464300/TraesCS1D02G132700/TraesCS5D02G550100/TraesCS6B02G455600	10	BP
GO:0006301	postreplication repair	6/3745	190/107890	0.648848	0.918349	0.861849	TraesCS6D02G357600/TraesCS1B02G415800/TraesCS3B02G289300/TraesCS7D02G270100/TraesCS7B02G167800/TraesCS6B02G411100	6	BP
GO:0006783	heme biosynthetic process	5/3745	159/107890	0.649787	0.918349	0.861849	TraesCS7A02G260800/TraesCS6D02G259800/TraesCS7A02G239000/TraesCS1B02G258200/TraesCS7A02G415000	5	BP
GO:0051790	short-chain fatty acid biosynthetic process	13/3745	405/107890	0.651169	0.918349	0.861849	TraesCS6D02G294600/TraesCS6D02G252400/TraesCS6D02G378300/TraesCS6D02G181800/TraesCS6D02G203100/TraesCS7A02G209600/TraesCS6D02G338500/TraesCS6D02G216000/TraesCS6B02G235400/TraesCS5B02G158800/TraesCS6B02G345800/TraesCS6B02G432800/TraesCS6B02G467000	13	BP
GO:0010959	regulation of metal ion transport	3/3745	96/107890	0.651799	0.918349	0.861849	TraesCS6B02G344100/TraesCS4A02G405400/TraesCS3A02G208300	3	BP
GO:0042436	indole-containing compound catabolic process	16/3745	496/107890	0.651854	0.918349	0.861849	TraesCS6D02G328800/TraesCS3A02G287400/TraesCS3B02G266700/TraesCS6B02G425700/TraesCS2A02G019400/TraesCS5B02G155400/TraesCS6B02G379500/TraesCS5B02G155600/TraesCS7A02G416300/TraesCS6B02G369300/TraesCS5B02G158200/TraesCS6D02G112200/TraesCS7B02G271600/TraesCS7D02G364600/TraesCS7A02G358200/TraesCS7B02G269600	16	BP
GO:0071805	potassium ion transmembrane transport	10/3745	314/107890	0.652488	0.918349	0.861849	TraesCS6D02G181100/TraesCS7A02G209600/TraesCS7A02G209900/TraesCS7A02G242300/TraesCS1B02G441400/TraesCS1B02G278600/TraesCS6B02G432900/TraesCS2B02G305900/TraesCS6B02G382300/TraesCS6B02G382500	10	BP
GO:0000239	pachytene	1/3745	30/107890	0.653539	0.918349	0.861849	TraesCS3D02G164600	1	BP
GO:0000472	endonucleolytic cleavage to generate mature 5'-end of SSU-rRNA from (SSU-rRNA, 5.8S rRNA, LSU-rRNA)	1/3745	30/107890	0.653539	0.918349	0.861849	TraesCS3A02G209700	1	BP
GO:0000480	endonucleolytic cleavage in 5'-ETS of tricistronic rRNA transcript (SSU-rRNA, 5.8S rRNA, LSU-rRNA)	1/3745	30/107890	0.653539	0.918349	0.861849	TraesCS3A02G209700	1	BP
GO:0001822	kidney development	1/3745	30/107890	0.653539	0.918349	0.861849	TraesCS5B02G155100	1	BP
GO:0006941	striated muscle contraction	1/3745	30/107890	0.653539	0.918349	0.861849	TraesCS6B02G344100	1	BP
GO:0007004	telomere maintenance via telomerase	1/3745	30/107890	0.653539	0.918349	0.861849	TraesCS7B02G121400	1	BP
GO:0009098	leucine biosynthetic process	1/3745	30/107890	0.653539	0.918349	0.861849	TraesCS6D02G225800	1	BP
GO:0009645	response to low light intensity stimulus	1/3745	30/107890	0.653539	0.918349	0.861849	TraesCS6B02G350500	1	BP
GO:0010952	positive regulation of peptidase activity	1/3745	30/107890	0.653539	0.918349	0.861849	TraesCS6B02G335200	1	BP
GO:0033523	histone H2B ubiquitination	1/3745	30/107890	0.653539	0.918349	0.861849	TraesCS6B02G350800	1	BP
GO:0036265	RNA (guanine-N7)-methylation	1/3745	30/107890	0.653539	0.918349	0.861849	TraesCS6D02G274200	1	BP
GO:0045664	regulation of neuron differentiation	1/3745	30/107890	0.653539	0.918349	0.861849	TraesCS7A02G227400	1	BP
GO:0060776	simple leaf morphogenesis	1/3745	30/107890	0.653539	0.918349	0.861849	TraesCS3B02G106900	1	BP
GO:0031537	regulation of anthocyanin metabolic process	7/3745	222/107890	0.653586	0.918349	0.861849	TraesCS4B02G236700/TraesCS6D02G212700/TraesCS2B02G300500/TraesCS7A02G093900/TraesCS6B02G366900/TraesCS2B02G558400/TraesCS6B02G342700	7	BP
GO:0005977	glycogen metabolic process	6/3745	191/107890	0.653817	0.918349	0.861849	TraesCS6D02G287000/TraesCS3A02G366300/TraesCS1B02G277500/TraesCS6B02G336400/TraesCS3A02G211000/TraesCS6B02G257400	6	BP
GO:0046834	lipid phosphorylation	6/3745	191/107890	0.653817	0.918349	0.861849	TraesCS7A02G213100/TraesCS6D02G358000/TraesCS6D02G390100/TraesCS6D02G216000/TraesCS6B02G451200/TraesCS6B02G411500	6	BP
GO:0009943	adaxial/abaxial axis specification	13/3745	406/107890	0.654595	0.918951	0.862414	TraesCS7A02G255400/TraesCS7A02G211100/TraesCS7A02G263800/TraesCS6D02G242100/TraesCS6D02G220400/TraesCS6D02G361900/TraesCS6D02G269400/TraesCS6B02G288700/TraesCS6B02G366900/TraesCS5B02G157800/TraesCS6B02G472100/TraesCS6B02G414700/TraesCS4D02G120400	13	BP
GO:0048024	regulation of mRNA splicing, via spliceosome	2/3745	64/107890	0.655925	0.920102	0.863494	TraesCS7A02G234600/TraesCS1B02G252100	2	BP
GO:0010584	pollen exine formation	7/3745	223/107890	0.658166	0.920102	0.863494	TraesCS6D02G187100/TraesCS6D02G230400/TraesCS1B02G278100/TraesCS6B02G224000/TraesCS6B02G127900/TraesCS6B02G126200/TraesCS6A02G098100	7	BP
GO:0010268	brassinosteroid homeostasis	4/3745	129/107890	0.658526	0.920102	0.863494	TraesCS1B02G264200/TraesCS1B02G264400/TraesCS2A02G400500/TraesCS2D02G157900	4	BP
GO:0019400	alditol metabolic process	3/3745	97/107890	0.658691	0.920102	0.863494	TraesCS6D02G259000/TraesCS7A02G263000/TraesCS6B02G226700	3	BP
GO:0006561	proline biosynthetic process	2/3745	65/107890	0.664255	0.920102	0.863494	TraesCS2B02G106500/TraesCS6B02G274800	2	BP
GO:0007135	meiosis II	2/3745	65/107890	0.664255	0.920102	0.863494	TraesCS3D02G164600/TraesCS6B02G399000	2	BP
GO:0007164	establishment of tissue polarity	2/3745	65/107890	0.664255	0.920102	0.863494	TraesCS6D02G390100/TraesCS6B02G451200	2	BP
GO:0010496	intercellular transport	2/3745	65/107890	0.664255	0.920102	0.863494	TraesCS6D02G216300/TraesCS3B02G369300	2	BP
GO:0061983	meiosis II cell cycle process	2/3745	65/107890	0.664255	0.920102	0.863494	TraesCS3D02G164600/TraesCS6B02G399000	2	BP
GO:0090630	activation of GTPase activity	2/3745	65/107890	0.664255	0.920102	0.863494	TraesCS7A02G270600/TraesCS6B02G415900	2	BP
GO:0006890	retrograde vesicle-mediated transport, Golgi to endoplasmic reticulum	3/3745	98/107890	0.665483	0.920102	0.863494	TraesCS3D02G392900/TraesCS6B02G363500/TraesCS3B02G431200	3	BP
GO:0032434	regulation of proteasomal ubiquitin-dependent protein catabolic process	3/3745	98/107890	0.665483	0.920102	0.863494	TraesCS6D02G187100/TraesCS5B02G153700/TraesCS4B02G208900	3	BP
GO:0051340	regulation of ligase activity	3/3745	98/107890	0.665483	0.920102	0.863494	TraesCS6D02G195300/TraesCS6D02G233200/TraesCS6D02G327000	3	BP
GO:2000058	regulation of ubiquitin-dependent protein catabolic process	3/3745	98/107890	0.665483	0.920102	0.863494	TraesCS6D02G187100/TraesCS5B02G153700/TraesCS4B02G208900	3	BP
GO:0005980	glycogen catabolic process	1/3745	31/107890	0.665569	0.920102	0.863494	TraesCS3A02G366300	1	BP
GO:0006273	lagging strand elongation	1/3745	31/107890	0.665569	0.920102	0.863494	TraesCS6D02G251900	1	BP
GO:0007266	Rho protein signal transduction	1/3745	31/107890	0.665569	0.920102	0.863494	TraesCS6B02G335200	1	BP
GO:0009107	lipoate biosynthetic process	1/3745	31/107890	0.665569	0.920102	0.863494	TraesCS6D02G217500	1	BP
GO:0009446	putrescine biosynthetic process	1/3745	31/107890	0.665569	0.920102	0.863494	TraesCS1D02G012300	1	BP
GO:0010236	plastoquinone biosynthetic process	1/3745	31/107890	0.665569	0.920102	0.863494	TraesCS6D02G219600	1	BP
GO:0014902	myotube differentiation	1/3745	31/107890	0.665569	0.920102	0.863494	TraesCS4D02G126400	1	BP
GO:0014904	myotube cell development	1/3745	31/107890	0.665569	0.920102	0.863494	TraesCS4D02G126400	1	BP
GO:0015909	long-chain fatty acid transport	1/3745	31/107890	0.665569	0.920102	0.863494	TraesCS4D02G217600	1	BP
GO:0018342	protein prenylation	1/3745	31/107890	0.665569	0.920102	0.863494	TraesCS7A02G248400	1	BP
GO:0030201	heparan sulfate proteoglycan metabolic process	1/3745	31/107890	0.665569	0.920102	0.863494	TraesCS3A02G207900	1	BP
GO:0031126	sno(s)RNA 3'-end processing	1/3745	31/107890	0.665569	0.920102	0.863494	TraesCS6D02G384500	1	BP
GO:0048741	skeletal muscle fiber development	1/3745	31/107890	0.665569	0.920102	0.863494	TraesCS4D02G126400	1	BP
GO:0050867	positive regulation of cell activation	1/3745	31/107890	0.665569	0.920102	0.863494	TraesCS6D02G242400	1	BP
GO:0097354	prenylation	1/3745	31/107890	0.665569	0.920102	0.863494	TraesCS7A02G248400	1	BP
GO:0060284	regulation of cell development	7/3745	225/107890	0.667214	0.921892	0.865174	TraesCS6D02G294500/TraesCS7A02G228200/TraesCS7A02G227400/TraesCS6D02G242400/TraesCS6D02G379500/TraesCS6B02G468200/TraesCS6B02G345700	7	BP
GO:0010562	positive regulation of phosphorus metabolic process	15/3745	472/107890	0.671469	0.923744	0.866912	TraesCS6D02G332100/TraesCS6D02G328800/TraesCS5B02G154600/TraesCS4B02G116000/TraesCS6B02G362300/TraesCS6B02G226200/TraesCS4B02G115800/TraesCS6B02G382700/TraesCS6B02G352700/TraesCS6B02G379500/TraesCS5D02G184300/TraesCS6B02G358800/TraesCS5A02G179700/TraesCS1B02G375400/TraesCS5B02G177500	15	BP
GO:0045937	positive regulation of phosphate metabolic process	15/3745	472/107890	0.671469	0.923744	0.866912	TraesCS6D02G332100/TraesCS6D02G328800/TraesCS5B02G154600/TraesCS4B02G116000/TraesCS6B02G362300/TraesCS6B02G226200/TraesCS4B02G115800/TraesCS6B02G382700/TraesCS6B02G352700/TraesCS6B02G379500/TraesCS5D02G184300/TraesCS6B02G358800/TraesCS5A02G179700/TraesCS1B02G375400/TraesCS5B02G177500	15	BP
GO:0043434	response to peptide hormone	7/3745	226/107890	0.671683	0.923744	0.866912	TraesCS3A02G437400/TraesCS6B02G421000/TraesCS6B02G452200/TraesCS6B02G229000/TraesCS6B02G429600/TraesCS1A02G186200/TraesCS7D02G131600	7	BP
GO:0010120	camalexin biosynthetic process	3/3745	99/107890	0.672177	0.923744	0.866912	TraesCS6D02G328800/TraesCS6B02G379500/TraesCS1D02G072900	3	BP
GO:0052317	camalexin metabolic process	3/3745	99/107890	0.672177	0.923744	0.866912	TraesCS6D02G328800/TraesCS6B02G379500/TraesCS1D02G072900	3	BP
GO:0007188	adenylate cyclase-modulating G protein-coupled receptor signaling pathway	2/3745	66/107890	0.672421	0.923744	0.866912	TraesCS4B02G173700/TraesCS6B02G229000	2	BP
GO:0009920	cell plate formation involved in plant-type cell wall biogenesis	2/3745	66/107890	0.672421	0.923744	0.866912	TraesCS7A02G234900/TraesCS3D02G120200	2	BP
GO:0009938	negative regulation of gibberellic acid mediated signaling pathway	2/3745	66/107890	0.672421	0.923744	0.866912	TraesCS7A02G225700/TraesCS3D02G385400	2	BP
GO:0010132	dhurrin biosynthetic process	2/3745	66/107890	0.672421	0.923744	0.866912	TraesCS5A02G495200/TraesCS2A02G019400	2	BP
GO:0015865	purine nucleotide transport	2/3745	66/107890	0.672421	0.923744	0.866912	TraesCS4B02G119700/TraesCS3A02G206300	2	BP
GO:0043331	response to dsRNA	2/3745	66/107890	0.672421	0.923744	0.866912	TraesCS7A02G262500/TraesCS6B02G347100	2	BP
GO:0001708	cell fate specification	6/3745	195/107890	0.673255	0.924407	0.867534	TraesCS7A02G260600/TraesCS6D02G220400/TraesCS3A02G434900/TraesCS6B02G366900/TraesCS6B02G393100/TraesCS4D02G104300	6	BP
GO:1901652	response to peptide	7/3745	227/107890	0.676114	0.925838	0.868877	TraesCS3A02G437400/TraesCS6B02G421000/TraesCS6B02G452200/TraesCS6B02G229000/TraesCS6B02G429600/TraesCS1A02G186200/TraesCS7D02G131600	7	BP
GO:1902532	negative regulation of intracellular signal transduction	5/3745	164/107890	0.676305	0.925838	0.868877	TraesCS6D02G263500/TraesCS7B02G027500/TraesCS6B02G235500/TraesCS6B02G335200/TraesCS6B02G439600	5	BP
GO:0007040	lysosome organization	1/3745	32/107890	0.677181	0.925838	0.868877	TraesCS1B02G252100	1	BP
GO:0019348	dolichol metabolic process	1/3745	32/107890	0.677181	0.925838	0.868877	TraesCS6B02G352400	1	BP
GO:0046500	S-adenosylmethionine metabolic process	1/3745	32/107890	0.677181	0.925838	0.868877	TraesCS6B02G455100	1	BP
GO:0048747	muscle fiber development	1/3745	32/107890	0.677181	0.925838	0.868877	TraesCS4D02G126400	1	BP
GO:0050830	defense response to Gram-positive bacterium	1/3745	32/107890	0.677181	0.925838	0.868877	TraesCS2D02G480300	1	BP
GO:0007249	I-kappaB kinase/NF-kappaB signaling	2/3745	67/107890	0.680425	0.925838	0.868877	TraesCS6B02G449300/TraesCS6B02G452200	2	BP
GO:0042451	purine nucleoside biosynthetic process	2/3745	67/107890	0.680425	0.925838	0.868877	TraesCS6D02G202500/TraesCS6B02G455100	2	BP
GO:0046129	purine ribonucleoside biosynthetic process	2/3745	67/107890	0.680425	0.925838	0.868877	TraesCS6D02G202500/TraesCS6B02G455100	2	BP
GO:0060537	muscle tissue development	4/3745	133/107890	0.681785	0.925838	0.868877	TraesCS7A02G419900/TraesCS4D02G126400/TraesCS5D02G441800/TraesCS5B02G436800	4	BP
GO:0007417	central nervous system development	6/3745	197/107890	0.682707	0.925838	0.868877	TraesCS7A02G227400/TraesCS7A02G262700/TraesCS6B02G421000/TraesCS6B02G452200/TraesCS2B02G429300/TraesCS7A02G418100	6	BP
GO:0009958	positive gravitropism	6/3745	197/107890	0.682707	0.925838	0.868877	TraesCS7A02G284900/TraesCS6D02G390100/TraesCS6B02G337300/TraesCS6B02G451200/TraesCS6B02G340100/TraesCS6B02G237800	6	BP
GO:0010017	red or far-red light signaling pathway	9/3745	291/107890	0.68285	0.925838	0.868877	TraesCS6D02G202000/TraesCS6D02G305800/TraesCS1B02G244300/TraesCS6B02G331000/TraesCS6B02G356400/TraesCS6B02G227500/TraesCS3A02G210100/TraesCS6B02G418600/TraesCS4D02G121300	9	BP
GO:0034293	sexual sporulation	12/3745	384/107890	0.683732	0.925838	0.868877	TraesCS6D02G186900/TraesCS6D02G191600/TraesCS6D02G293200/TraesCS7B02G009900/TraesCS7A02G275500/TraesCS7D02G176700/TraesCS6B02G223700/TraesCS6B02G468200/TraesCS6B02G236600/TraesCS3D02G164600/TraesCS6B02G343900/TraesCS4D02G104300	12	BP
GO:0016139	glycoside catabolic process	3/3745	101/107890	0.685266	0.925838	0.868877	TraesCS5B02G155400/TraesCS5B02G155600/TraesCS7B02G271600	3	BP
GO:0031122	cytoplasmic microtubule organization	3/3745	101/107890	0.685266	0.925838	0.868877	TraesCS3D02G164500/TraesCS6B02G226200/TraesCS4B02G173200	3	BP
GO:0006089	lactate metabolic process	10/3745	323/107890	0.686447	0.925838	0.868877	TraesCS6D02G221800/TraesCS6D02G216200/TraesCS6D02G393200/TraesCS7A02G252400/TraesCS7A02G261700/TraesCS1B02G273600/TraesCS5B02G464300/TraesCS1D02G132700/TraesCS5D02G550100/TraesCS6B02G455600	10	BP
GO:0042330	taxis	6/3745	198/107890	0.687366	0.925838	0.868877	TraesCS6D02G252800/TraesCS6A02G132700/TraesCS5B02G159100/TraesCS6B02G377200/TraesCS3A02G211000/TraesCS4D02G305100	6	BP
GO:0010208	pollen wall assembly	8/3745	261/107890	0.687541	0.925838	0.868877	TraesCS6D02G187100/TraesCS6D02G230400/TraesCS1B02G278100/TraesCS6B02G468200/TraesCS6B02G224000/TraesCS6B02G127900/TraesCS6B02G126200/TraesCS6A02G098100	8	BP
GO:0002478	antigen processing and presentation of exogenous peptide antigen	2/3745	68/107890	0.688269	0.925838	0.868877	TraesCS6D02G195300/TraesCS5B02G159100	2	BP
GO:0010506	regulation of autophagy	2/3745	68/107890	0.688269	0.925838	0.868877	TraesCS5A02G548000/TraesCS1D02G072900	2	BP
GO:0019882	antigen processing and presentation	2/3745	68/107890	0.688269	0.925838	0.868877	TraesCS6D02G195300/TraesCS5B02G159100	2	BP
GO:0019884	antigen processing and presentation of exogenous antigen	2/3745	68/107890	0.688269	0.925838	0.868877	TraesCS6D02G195300/TraesCS5B02G159100	2	BP
GO:0036294	cellular response to decreased oxygen levels	2/3745	68/107890	0.688269	0.925838	0.868877	TraesCS6D02G254700/TraesCS2D02G034400	2	BP
GO:0048002	antigen processing and presentation of peptide antigen	2/3745	68/107890	0.688269	0.925838	0.868877	TraesCS6D02G195300/TraesCS5B02G159100	2	BP
GO:0071453	cellular response to oxygen levels	2/3745	68/107890	0.688269	0.925838	0.868877	TraesCS6D02G254700/TraesCS2D02G034400	2	BP
GO:0080188	gene silencing by RNA-directed DNA methylation	2/3745	68/107890	0.688269	0.925838	0.868877	TraesCS3D02G165900/TraesCS4B02G118300	2	BP
GO:0140458	pre-transcriptional gene silencing by RNA	2/3745	68/107890	0.688269	0.925838	0.868877	TraesCS3D02G165900/TraesCS4B02G118300	2	BP
GO:1901806	beta-glucoside biosynthetic process	2/3745	68/107890	0.688269	0.925838	0.868877	TraesCS5A02G495200/TraesCS2A02G019400	2	BP
GO:0000103	sulfate assimilation	1/3745	33/107890	0.688389	0.925838	0.868877	TraesCS6D02G216000	1	BP
GO:0002479	antigen processing and presentation of exogenous peptide antigen via MHC class I, TAP-dependent	1/3745	33/107890	0.688389	0.925838	0.868877	TraesCS6D02G195300	1	BP
GO:0007032	endosome organization	1/3745	33/107890	0.688389	0.925838	0.868877	TraesCS6B02G239500	1	BP
GO:0009445	putrescine metabolic process	1/3745	33/107890	0.688389	0.925838	0.868877	TraesCS1D02G012300	1	BP
GO:0010165	response to X-ray	1/3745	33/107890	0.688389	0.925838	0.868877	TraesCS6B02G354700	1	BP
GO:0034472	snRNA 3'-end processing	1/3745	33/107890	0.688389	0.925838	0.868877	TraesCS1A02G324600	1	BP
GO:0043101	purine-containing compound salvage	1/3745	33/107890	0.688389	0.925838	0.868877	TraesCS1B02G238200	1	BP
GO:0043981	histone H4-K5 acetylation	1/3745	33/107890	0.688389	0.925838	0.868877	TraesCS6D02G232000	1	BP
GO:0071333	cellular response to glucose stimulus	1/3745	33/107890	0.688389	0.925838	0.868877	TraesCS4B02G174900	1	BP
GO:0072001	renal system development	1/3745	33/107890	0.688389	0.925838	0.868877	TraesCS5B02G155100	1	BP
GO:0071489	cellular response to red or far red light	9/3745	293/107890	0.690533	0.928246	0.871137	TraesCS6D02G202000/TraesCS6D02G305800/TraesCS1B02G244300/TraesCS6B02G331000/TraesCS6B02G356400/TraesCS6B02G227500/TraesCS3A02G210100/TraesCS6B02G418600/TraesCS4D02G121300	9	BP
GO:0009700	indole phytoalexin biosynthetic process	3/3745	102/107890	0.691662	0.928813	0.871669	TraesCS6D02G328800/TraesCS6B02G379500/TraesCS1D02G072900	3	BP
GO:0046217	indole phytoalexin metabolic process	3/3745	102/107890	0.691662	0.928813	0.871669	TraesCS6D02G328800/TraesCS6B02G379500/TraesCS1D02G072900	3	BP
GO:0009798	axis specification	15/3745	479/107890	0.692807	0.929449	0.872266	TraesCS7A02G255400/TraesCS7A02G211100/TraesCS7A02G228200/TraesCS7A02G263800/TraesCS6D02G242100/TraesCS6D02G220400/TraesCS6D02G361900/TraesCS6D02G269400/TraesCS6B02G288700/TraesCS6B02G366900/TraesCS5B02G157800/TraesCS6B02G472100/TraesCS6B02G414700/TraesCS4D02G120400/TraesCS4D02G305100	15	BP
GO:0031570	DNA integrity checkpoint	7/3745	231/107890	0.693459	0.929449	0.872266	TraesCS6D02G195300/TraesCS6D02G305800/TraesCS7A02G214200/TraesCS2D02G480300/TraesCS6B02G334400/TraesCS6B02G356400/TraesCS7B02G115400	7	BP
GO:0030307	positive regulation of cell growth	2/3745	69/107890	0.695953	0.929449	0.872266	TraesCS6D02G358000/TraesCS6B02G411500	2	BP
GO:0046620	regulation of organ growth	2/3745	69/107890	0.695953	0.929449	0.872266	TraesCS7A02G273300/TraesCS6B02G418600	2	BP
GO:0051262	protein tetramerization	4/3745	136/107890	0.698484	0.929449	0.872266	TraesCS6D02G183200/TraesCS7B02G283000/TraesCS2B02G129600/TraesCS2B02G429300	4	BP
GO:0007349	cellularization	1/3745	34/107890	0.699209	0.929449	0.872266	TraesCS6B02G335200	1	BP
GO:0009395	phospholipid catabolic process	1/3745	34/107890	0.699209	0.929449	0.872266	TraesCS7A02G263000	1	BP
GO:0010138	pyrimidine ribonucleotide salvage	1/3745	34/107890	0.699209	0.929449	0.872266	TraesCS7A02G259200	1	BP
GO:0010597	green leaf volatile biosynthetic process	1/3745	34/107890	0.699209	0.929449	0.872266	TraesCS7B02G307700	1	BP
GO:0015867	ATP transport	1/3745	34/107890	0.699209	0.929449	0.872266	TraesCS4B02G119700	1	BP
GO:0019372	lipoxygenase pathway	1/3745	34/107890	0.699209	0.929449	0.872266	TraesCS7B02G307700	1	BP
GO:0032262	pyrimidine nucleotide salvage	1/3745	34/107890	0.699209	0.929449	0.872266	TraesCS7A02G259200	1	BP
GO:0043470	regulation of carbohydrate catabolic process	1/3745	34/107890	0.699209	0.929449	0.872266	TraesCS6B02G331600	1	BP
GO:0043471	regulation of cellular carbohydrate catabolic process	1/3745	34/107890	0.699209	0.929449	0.872266	TraesCS6B02G331600	1	BP
GO:0044206	UMP salvage	1/3745	34/107890	0.699209	0.929449	0.872266	TraesCS7A02G259200	1	BP
GO:0046113	nucleobase catabolic process	1/3745	34/107890	0.699209	0.929449	0.872266	TraesCS4D02G145000	1	BP
GO:0071326	cellular response to monosaccharide stimulus	1/3745	34/107890	0.699209	0.929449	0.872266	TraesCS4B02G174900	1	BP
GO:0071331	cellular response to hexose stimulus	1/3745	34/107890	0.699209	0.929449	0.872266	TraesCS4B02G174900	1	BP
GO:0071484	cellular response to light intensity	1/3745	34/107890	0.699209	0.929449	0.872266	TraesCS7A02G282100	1	BP
GO:0090358	positive regulation of tryptophan metabolic process	1/3745	34/107890	0.699209	0.929449	0.872266	TraesCS6D02G251700	1	BP
GO:0016554	cytidine to uridine editing	2/3745	70/107890	0.703479	0.931727	0.874404	TraesCS7A02G262500/TraesCS3D02G101500	2	BP
GO:0042638	exogen	2/3745	70/107890	0.703479	0.931727	0.874404	TraesCS6D02G195300/TraesCS5B02G159100	2	BP
GO:0044851	hair cycle phase	2/3745	70/107890	0.703479	0.931727	0.874404	TraesCS6D02G195300/TraesCS5B02G159100	2	BP
GO:0048820	hair follicle maturation	2/3745	70/107890	0.703479	0.931727	0.874404	TraesCS6D02G195300/TraesCS5B02G159100	2	BP
GO:0070076	histone lysine demethylation	2/3745	70/107890	0.703479	0.931727	0.874404	TraesCS7A02G246000/TraesCS5D02G454200	2	BP
GO:0009969	xyloglucan biosynthetic process	4/3745	137/107890	0.703908	0.931727	0.874404	TraesCS6D02G181200/TraesCS6D02G300400/TraesCS5D02G092500/TraesCS6B02G350900	4	BP
GO:0002119	nematode larval development	10/3745	328/107890	0.704414	0.931727	0.874404	TraesCS6D02G187100/TraesCS6D02G253600/TraesCS6D02G190000/TraesCS6D02G256000/TraesCS4B02G218100/TraesCS3D02G163900/TraesCS6B02G225700/TraesCS6B02G224000/TraesCS6B02G239500/TraesCS6B02G396200	10	BP
GO:0010501	RNA secondary structure unwinding	5/3745	170/107890	0.706313	0.931727	0.874404	TraesCS6D02G216300/TraesCS6D02G392700/TraesCS1B02G273000/TraesCS1B02G273100/TraesCS6B02G391200	5	BP
GO:0006900	vesicle budding from membrane	4/3745	138/107890	0.70926	0.931727	0.874404	TraesCS1B02G252100/TraesCS6B02G335200/TraesCS6B02G407500/TraesCS6B02G239500	4	BP
GO:0009789	positive regulation of abscisic acid-activated signaling pathway	4/3745	138/107890	0.70926	0.931727	0.874404	TraesCS6B02G432600/TraesCS7D02G364600/TraesCS7A02G358200/TraesCS7B02G269600	4	BP
GO:0045732	positive regulation of protein catabolic process	4/3745	138/107890	0.70926	0.931727	0.874404	TraesCS6D02G360700/TraesCS5B02G153700/TraesCS6B02G341600/TraesCS4B02G208900	4	BP
GO:1901421	positive regulation of response to alcohol	4/3745	138/107890	0.70926	0.931727	0.874404	TraesCS6B02G432600/TraesCS7D02G364600/TraesCS7A02G358200/TraesCS7B02G269600	4	BP
GO:1905959	positive regulation of cellular response to alcohol	4/3745	138/107890	0.70926	0.931727	0.874404	TraesCS6B02G432600/TraesCS7D02G364600/TraesCS7A02G358200/TraesCS7B02G269600	4	BP
GO:0002495	antigen processing and presentation of peptide antigen via MHC class II	1/3745	35/107890	0.709653	0.931727	0.874404	TraesCS5B02G159100	1	BP
GO:0002504	antigen processing and presentation of peptide or polysaccharide antigen via MHC class II	1/3745	35/107890	0.709653	0.931727	0.874404	TraesCS5B02G159100	1	BP
GO:0009768	photosynthesis, light harvesting in photosystem I	1/3745	35/107890	0.709653	0.931727	0.874404	TraesCS6B02G350500	1	BP
GO:0016574	histone ubiquitination	1/3745	35/107890	0.709653	0.931727	0.874404	TraesCS6B02G350800	1	BP
GO:0019886	antigen processing and presentation of exogenous peptide antigen via MHC class II	1/3745	35/107890	0.709653	0.931727	0.874404	TraesCS5B02G159100	1	BP
GO:0031573	intra-S DNA damage checkpoint	1/3745	35/107890	0.709653	0.931727	0.874404	TraesCS7A02G214200	1	BP
GO:0035305	negative regulation of dephosphorylation	1/3745	35/107890	0.709653	0.931727	0.874404	TraesCS7B02G278100	1	BP
GO:0045764	positive regulation of cellular amino acid metabolic process	1/3745	35/107890	0.709653	0.931727	0.874404	TraesCS6D02G251700	1	BP
[truncated: 669 more rows]
